# Supplementary material for: Comprehensive analysis of indels in whole-genome microsatellite regions and microsatellite instability across 21 cancer types
Source: HighWire-hosted journal article supplement (doi:10.1101/gr.255026.119), 2020-03-01
Supplement: Supplemental_Information_.docx [file Supplemental_Information_.docx]

**Supplementary Material**

**Comprehensive Analysis of Indels in Whole-genome Microsatellite Regions and Microsatellite Instability across 21 Cancer Types**

Akihiro Fujimoto, Masashi Fujita, Takanori Hasegawa, Jing Hao Wong, Kazuhiro Maejima, Aya Oku-Sasaki,　Kaoru Nakano, Yuichi Shiraishi, Satoru Miyano, Go Yamamoto, Kiwamu Akagi, Seiya Imoto, and Hidewaki Nakagawa

**Table of Contents:**

**Supplemental Tables**

**Supplemental Figure S1.** **Definition of microsatellite (MS) in the human genome.**

**Supplemental Figure S2.** **Methods for error rate estimation.**

**Supplemental Figure S3.** **Error rate estimation with hemizygotic Chr X data.**

**Supplemental Figure S4.** **Evaluation of threshold.**

**Supplemental Figure S5. Comparison with PCAWG callers.**

**Supplemental Figure S6. Validation of somatic indels in microsatellites.**

**Supplemental Figure S7. Proportion of mutated microsatellites among different categories.**

**Supplemental Figure S8. Threshold determination and mutation rate of Bethesda markers.**

**Supplemental Figure S9. Correlation between the mutation rate of microsatellites and the number of somatic SNVs.**

**Supplemental Figure S10. Correlation between the mutation rate of microsatellites and the number of somatic indels.**

**Supplemental Figure S11. DNA shape and mutability of microsatellites.**

**Supplemental Figure S12. Germline variation and somatic mutation rates of microsatellites.**

**Supplemental Figure S13. Highly-mutated microsatellite markers.**

**Supplemental Figure S14. Analysis of microsatellite** **mutation rate per gene.**

**Supplemental Figure S15. Mutation rate and *POLE*-mutated samples.**

**Supplemental Figure S16. Mutation rates of microsatellites and PCAWG mutational signatures.**

**Supplemental Figure S17. Prediction of neo-antigens in MSI/MSS tumors.**

**Supplemental Figure S18. Filtering microsatellites for this study.**

**Supplemental Figure S19. Examples of indel mutations by MiSeq.**

**Supplemental Tables**

**Table S1: Estimated error rates for genotyping.** Refer to Tab 2 in Supplemental_Tables.xlsx.

**Table S2: Summary of identified mutations.** Refer to Tab 3 in Supplemental_Tables.xlsx.

**Table S3: Correlation between the total number of SNVs/indels and the number of SNVs/indels in 1Mbp bins.** Refer to Tab 4 in Supplemental_Tables.xlsx.

**Table S4: Summary of regression on proportion of mutated samples in each microsatellite.** Refer to Tab 5 in Supplemental_Tables.xlsx.

**Table S5: Highly mutated microsatellite markers.** Refer to Tab 6 in Supplemental_Tables.xlsx.

**Table S6: Genes with large numbers of mutated microsatellites.** Refer to Tab 7 in Supplemental_Tables.xlsx.

**Table S7: Highly mutated microsatellites in coding regions.** Refer to Tab 8 in Supplemental_Tables.xlsx.

**Table S8: Association between microsatellite mutations and gene expression in CR.** Refer to Tab 9 in Supplemental_Tables.xlsx.

**Table S9: Association between microsatellite mutations and gene expression in ST.** Refer to Tab 10 in Supplemental_Tables.xlsx.

**Table S10: Association between microsatellite mutations and gene expression in UT.** Refer to Tab 11 in Supplemental_Tables.xlsx.

**Table S11: Somatic mutations of *POLE* gene and mutation rate of microsatellites, SNVs and indels.** Refer to Tab 12 in Supplemental_Tables.xlsx.

**Table S12: Association between mutational signatures and MSI.** Refer to Tab 13 in Supplemental_Tables.xlsx.

**Table S13: Association between mutational signatures and mutations in exonuclease domain of *POLE*.** Refer to Tab 14 in Supplemental_Tables.xlsx.

**Table S14: ICGC project code and abbreviation.** Refer to Tab 15 in Supplemental_Tables.xlsx.

**Table S15: Primer set for validation.** Refer to Tab 16 in Supplemental_Tables.xlsx.

**Table S16: Mutation table.** Refer to Table_S16.txt.

**Supplemental Figure S1.** **Definition of microsatellite (MS) in the human genome.** (a) Number of microsatellites in each chromosome. (b) Length distribution of microsatellites. Length is distance between the start and end positions of each microsatellite in the reference genome sequence. (c) Distribution of unit length. (d) Proportion of MS type.

**Supplemental Figure S1.** **Definition of microsatellite (MS) in the human genome.** (continued) (e) Number of MS regions using different methods. (f) Length distribution of MS in different methods. Length is distance between the start and end positions of each microsatellite in the reference genome sequence.

**Supplemental Figure S2.** **Methods for error rate estimation.** (a) Method for error rate estimation. (b) Method for false positive/negative rate estimation with mixed Chr X data. (c) Example of a combination of true genotype in simulation data, result of variant calling and classification.

**Supplemental Figure S3.** **Error rate estimation with hemizygotic Chr X data.** (a) Error rate/reads for different microsatellite length and unit type. Length is distance between the start and end positions of each microsatellite in the reference genome sequence. (b) Error rate of microsatellites 5-9bp in length. (c) Error rate of microsatellites 10-19bp in length. (d) Error rate of microsatellites 20-29bp in length. (e) Error rate of microsatellites 30-39bp in length. (f) Error rate of microsatellites 40-100bp in length.

**Supplemental Figure S4.** **Evaluation of threshold.** (a) Threshold for microsatellite mutation calling and false negative rate. Higher *L* value showed higher false negative rate. (b) Threshold for microsatellite mutation calling and false positive rate. Higher *L* value showed lower false positive rate. (c) Threshold for microsatellite mutation calling and false positive and negative rates. Trade-off effect of *L* values are shown. (d) Number of reads covering microsatellites. In (a), (b) and (d), microsatellites were classified by length of the microsatellites in the reference genome sequence.

**Supplemental Figure S5. Comparison with PCAWG callers.** (a) Number of identified mutated microsatellites with MIMcall and PCAWG callers. (b) Correlation between our call and consensus with PCAWG callers ( ≥ 2 callers).

**Supplemental Figure S6. Validation of somatic indels in microsatellites.** (a) Length distribution of all microsatellite (MS) and MS selected for validation. (b-g) Examples of the electrophoresis are shown.

**Supplemental Figure S7. Proportion of mutated microsatellites among different categories.** (a) Coding region. (b) UTR region. (c) Intronic regions. (d) Non-genic region. Numbers of microsatellites with mutation rate ≥ 0.001 and those with < 0.001 were compared for each category using chi-squared test.

**Supplemental Figure S8. Threshold determination and mutation rate of Bethesda markers.** (a) Threshold determination for MSI. A threshold of 0.03 was able to clearly divide the samples into two groups. (b) Mutation rate of all microsatellites of samples with ≥ 1 testable Bethesda markers (number of reads ≥ 15 in cancer and matched normal samples). Only 342 samples had ≥ 1 testable Bethesda markers. (c) Number of testable Bethesda markers in each sample. (d) Mutation rate of Bethesda markers in each sample. Pattern of mutation rate of all microsatellites and Bethesda markers were consistent.

**Supplemental Figure S9. Correlation between the mutation rate of microsatellites and the number of somatic SNVs.** (a) MY *r*=0.08 (NS), (b) KI *r*=0.22 (corrected *p-value*=0.024), (c) CN *r*=0.29 (NS), (d) BR *r*=0.16 (NS), (e) BS *r*=0.57 (corrected *p-value*=2.6E-09), (f) OV *r*=0.62 (corrected *p-value*=9.1E-12), (g) TH *r*=-0.35 (NS), (h) LI r=0.78 (corrected *p-value*=5.1E-55), (i) SK *r*=0.05 (NS), (j) PR *r*=0.54 (corrected *p-value*=3.2E-21), (k) LU r=0.42 (corrected *p-value*=0.0045), (l) CE *r*=0.3 (NS) , (m) LY *r*=0.86 (corrected *p-value*=3.4E-58), (n) PA *r*=0.51 (corrected *p-value*=8.3E-22), (o) UT *r*=0.53 (corrected *p-value*=0.0017), (p) HN *r*=0.26 (NS), (q) BD r=-0.03 (NS), (r) ST *r*=0.76 (corrected *p-value*=9.9E-15), (s) BI *r*=0.65 (NS), (t) ES *r*=0.45 (corrected *p-value*=8.6E-05), and (u) CR *r*=0 (NS). Correction for multiple testing was perform using Bonferroni correction. NS; Not significant. *r*; Pearson's product moment correlation coefficient.

**Supplemental Figure S10. Correlation between the mutation rate of microsatellites and the number of somatic indels.** (a) MY *r*=0.19 (NS), (b) KI *r*=0.93 (corrected *p-value*=4.2E-90), (c) CN *r*=0.4 (corrected *p-value*=5.8E-11), (d) BR *r*=0.66 (corrected *p-value*=6.8E-26), (e) BS *r*=0.66 (corrected *p-value*=1.9E-13), (f) OV *r*=0.99 (corrected *p-value*=1.9E-106), (g) TH *r*=-0.13 (NS), (h) LI *r*=1 (corrected *p-value*=3.2E-273), (i) SK *r*=0.99 (corrected *p-value*=4.1E-82), (j) PR *r*=0.21 (corrected *p-value*=0.0070), (k) LU *r*=0.65 (corrected *p-value*=1.1E-08), (l) CE *r*=0.61 (NS), (m) LY *r*=0.98 (corrected *p-value*=1.3E-143), (n) PA *r*=0.96 (corrected *p-value*=1.2E-182), (o) UT *r*=0.98 (corrected *p-value*=6.6E-33), (p) HN *r*=0.59 (corrected *p-value*=3.3E-05), (q) BD *r*=0.48 (NS), (r) ST *r*=1 (corrected *p-value*=3.2E-108), (s) BI *r*=0.93 (corrected *p-value*=0.00031), (t) ES *r*=0.95 (corrected *p-value*=4.2E-49), and (u) CR *r*=0.99 (corrected *p-value*=1.1E-51). Correction for multiple testing was perform by the Bonferroni correction. NS; Not significant. *r*; Pearson's product moment correlation coefficient.

**Supplemental Figure S11. DNA shape and mutability of microsatellites.** Distance from microsatellites and HelT for microsatellites with different mutability; (a) Deletion in MSI, (b) Insertion in MSI, (c) Deletion in MSS and (d) Insertion in MSS. Distance from microsatellites and minor groove width (MGW) for microsatellites with different mutability; (e) Deletion in MSI, (f) Insertion in MSI, (g) Deletion in MSS and (h) Insertion in MSS. Average and 95% confidence intervals are shown.

**Supplemental Figure S11. DNA shape and mutability of microsatellites.** (continued) Distance from microsatellites and OC2 (ORChID2) for microsatellites with different mutability; (i) Deletion in MSI, (j) Insertion in MSI, (k) Deletion in MSS and (l) Insertion in MSS. Distance from microsatellites and ProT for microsatellites with different mutability; (m) Deletion in MSI, (n) Insertion in MSI, (o) Deletion in MSS and (p) Insertion in MSS. Average and 95% confidence intervals are shown.

**Supplemental Figure S11.** **DNA shape and mutability of microsatellites.** (continued) Distance from microsatellites and Roll for microsatellites with different mutability; (q) Deletion in MSI, (r) Insertion in MSI, (s) Deletion in MSS and (t) Insertion in MSS. Distance from microsatellites and Slide for microsatellites with different mutability; (u) Deletion in MSI, (v) Insertion in MSI, (w) Deletion in MSS and (x) Insertion in MSS. Average and 95% confidence intervals are shown.

**Supplemental Figure S12. Germline variation and somatic mutation rates of microsatellites.** The amount of germline variation was estimated using heterozygosity of normal tissues. X-axis; the proportion of mutated samples in each microsatellite (somatic mutation rate). Y-axis; heterozygosity of each microsatellite. Both rates were positively correlated (Pearson's product-moment correlation; *r* = 0.31, *p-value* < 1.0×10-100).

**Supplemental Figure S13. Highly-mutated microsatellite markers.** Result of clustering analysis with the top 20 microsatellites. **(a)** CR (Colon/Rectum) cancer. Mutation status for the 20 microsatellites in each sample are shown. Colors indicates mutation status of each microsatellite (Red; mutated, blue; unmutated and white; unanalyzed due to low depth). Sample ID and name of the 20 microsatellites are shown.

**Supplemental Figure S13. Highly-mutated microsatellite markers.** (continued) Result of clustering analysis with the top 20 microsatellites. **(b)** ST (Stomach) cancer. Mutation status for the 20 microsatellites in each sample are shown. Colors indicates mutation status of each microsatellite (Red; mutated, blue; unmutated and white; unanalyzed due to low depth). Sample ID and name of the 20 microsatellites are shown.

**Supplemental Figure S13. Highly-mutated microsatellite markers.** (continued) Result of clustering analysis with the top 20 microsatellites. **(c)** UT (Uterus) cancer. Mutation status for the 20 microsatellites in each sample are shown. Colors indicates mutation status of each microsatellite (Red; mutated, blue; unmutated and white; unanalyzed due to low depth). Sample ID and name of the 20 microsatellites are shown.

**Supplemental Figure S14. Analysis of microsatellite** **mutation rate per gene.** Total number of mutated microsatellites was calculated and compared with those of other genes. Genes with total number of mutated microsatellites ≥ 10 were used for analysis. Genes with odds ratio ≥ 5 are shown in this figure. Cancer types and gene names are shown. Upper panel; Odds ratio = (total number of mutated microsatellites in a gene)/(total number of un-mutated microsatellites in a gene)/(total number of mutated microsatellites in all other genes)/(total number of un-mutated microsatellites in all other genes). Lower panel; log(*q-value*) of the number of mutated microsatellites.

**Supplemental Figure S15. Mutation rate and *POLE*-mutated samples.** Mutation rates of MSI, MSS and samples with mutations in the exonuclease domain of *POLE* are shown. Upper panel; Mutation rate of microsatellites, Middle panel; Number of somatic SNV, and Lower panel; Number of somatic indels.

**Supplemental Figure S16. Mutation rates of microsatellites and PCAWG mutational signatures.** Mutation rate of microsatellites and fraction of mutational signatures are shown. Mutational signatures that differed significantly between the MSI and MSS samples were squares in figure legends. (a) DBS (double base substitution) signature of CR, (b) DBS signature of UT, (c) DBS signature of ST, (d) ID (indel) signature of CR, (e) ID signature of UT, (f) ID signature of ST.

**Supplemental Figure S17. Prediction of neo-antigens in MSI/MSS tumors.** (a) Number of neoantigens. The numbers of neo-antigens were compared between 31 MSI samples and 2,531 MSS samples. (b) mRNA expression levels of anti-tumor immunity genes *GZMA* and *IFNG.* mRNA expression levels of anti-tumor immunity genes *GZMA* and *IFNG* were positively correlated with microsatellite neo-antigens (*p-values* < 0.05, Jonckheere-Terpstra trend test).

**Supplemental Figure S18. Filtering microsatellites for this study.** Result of filtering was shown (see “Definition of microsatellite region for the analysis” in the Methods section). From 15,737,726 microsatellites, 8,817,054 microsatellites (“Unfiltered” in this figure) were selected for this study. After repeat unit definition, microsatellites were filtered with distance to closest microsatellite, similarity of flanking sequences and length of microsatellite. Cluster; distance between closest neighboring microsatellite < 30bp, Flanking sequence; upstream and downstream flaking sequences were mapped to different positions in the reference genome, Length; length of microsatellite region ≥ 80bp.

**Supplemental Figure S19. Examples of indel mutations by MiSeq.** (a) CR-8965 (MSI). (b) CR-10117 (MSS). Read counts of cancer and matched normal samples are shown.
