# Supplementary material for: Comprehensive analysis of indels in whole-genome microsatellite regions and microsatellite instability across 21 cancer types
Source: HighWire-hosted journal article supplement (doi:10.1101/gr.255026.119), 2020-03-01
Supplement: Supplemental_Tables.xlsx [file Supplemental_Tables.xlsx]

## Sheet: Index
Index:
Table S1	Estimated error rates for genotyping.
Table S2	Summary of identified mutations.
Table S3	Correlation between the total number of SNVs/indels and the number of SNVs/indels in 1Mbp bins.
Table S4	Summary of regression on proportion of mutated samples in each microsatellite.
Table S5	Highly mutated microsatellite markers.
Table S6	Genes with large numbers of mutated microsatellites.
Table S7	Highly mutated microsatellites in coding regions.
Table S8	Association between microsatellite mutations and gene expression in CR.
Table S9	Association between microsatellite mutations and gene expression in ST.
Table S10	Association between microsatellite mutations and gene expression in UT.
Table S11	Somatic mutations of POLE gene and mutation rate of microsatellites, SNVs and indels.
Table S12	Association between mutational signatures and MSI.
Table S13	Association between mutational signatures and mutations in exonuclease domain of POLE.
Table S14	ICGC project code and abbreviation.
Table S15	Primer set for validation.

## Sheet: Table S1
Table S1; Estimated error rates for genotyping
length(bp)	unit	≤-10	-9	-8	-7	-6	-5	-4	-3	-2	-1	1	2	3	4	5	6	7	8	9	≥10
0-9	A/T	0.001	0.001	0.001	0.001	0.001	0.001	0.001	0.001	0.001	0.0002	0.0001	0.001	0.001	0.001	0.001	0.001	0.001	0.001	0.001	0.001
0-9	C/G	0.001	0.001	0.001	0.001	0.001	0.001	0.001	0.001	0.001	0.0001	0.001	0.001	0.001	0.001	0.001	0.001	0.001	0.001	0.001	0.001
10-19	AC/GT	0.001	0.001	0.001	0.001	0.001	0.001	0.001	0.001	0.0002	0.0063	0.0005	0.001	0.001	0.001	0.001	0.001	0.001	0.001	0.001	0.001
10-19	CA/TG	0.001	0.001	0.001	0.001	0.001	0.001	0.001	0.001	0.0002	0.0049	0.0003	0.001	0.001	0.001	0.001	0.001	0.001	0.001	0.001	0.001
10-19	AT	0.001	0.001	0.001	0.001	0.001	0.001	0.001	0.001	0.0005	0.0092	0.0019	0.0001	0.001	0.001	0.001	0.001	0.001	0.001	0.001	0.001
10-19	TA	0.001	0.001	0.001	0.001	0.001	0.001	0.001	0.001	0.0005	0.008	0.0015	0.0001	0.001	0.001	0.001	0.001	0.001	0.001	0.001	0.001
10-19	GA/TC	0.001	0.001	0.001	0.001	0.001	0.001	0.001	0.001	0.0002	0.004	0.0001	0.001	0.001	0.001	0.001	0.001	0.001	0.001	0.001	0.001
10-19	C/G	0.001	0.001	0.0001	0.001	0.001	0.001	0.001	0.001	0.0001	0.0026	0.0008	0.0001	0.001	0.001	0.001	0.001	0.001	0.001	0.001	0.001
10-19	AG/CT	0.001	0.001	0.0001	0.001	0.001	0.001	0.001	0.001	0.0002	0.0035	0.0002	0.001	0.0001	0.001	0.001	0.001	0.001	0.001	0.001	0.001
10-19	A/T	0.001	0.001	0.001	0.001	0.001	0.001	0.0001	0.0002	0.0016	0.018	0.0097	0.0005	0.001	0.001	0.001	0.001	0.001	0.001	0.001	0.001
10-19	6bp	0.001	0.001	0.001	0.001	0.001	0.001	0.001	0.001	0.001	0.001	0.001	0.001	0.001	0.001	0.001	0.001	0.001	0.001	0.001	0.001
10-19	4bp	0.001	0.001	0.001	0.001	0.001	0.001	0.001	0.001	0.001	0.0008	0.001	0.001	0.001	0.001	0.001	0.001	0.001	0.001	0.001	0.001
10-19	3bp	0.001	0.001	0.001	0.001	0.001	0.001	0.001	0.001	0.001	0.0026	0.0001	0.001	0.001	0.001	0.001	0.001	0.001	0.001	0.001	0.001
10-19	2bp	0.001	0.001	0.001	0.001	0.001	0.001	0.001	0.001	0.001	0.001	0.001	0.001	0.001	0.001	0.001	0.001	0.001	0.001	0.001	0.001
10-19	5bp	0.001	0.001	0.001	0.001	0.001	0.001	0.001	0.001	0.001	0.001	0.001	0.001	0.001	0.001	0.001	0.001	0.001	0.001	0.001	0.001
20-29	AC/GT	0.001	0.001	0.001	0.0001	0.0003	0.0001	0.0002	0.0008	0.005	0.0501	0.0057	0.0004	0.0001	0.001	0.0001	0.0001	0.001	0.001	0.001	0.001
20-29	CA/TG	0.001	0.001	0.001	0.001	0.001	0.0001	0.0004	0.0007	0.005	0.046	0.0054	0.0006	0.0001	0.0002	0.001	0.001	0.001	0.001	0.001	0.001
20-29	A/T	0.001	0.001	0.001	0.001	0.001	0.0001	0.0002	0.0005	0.0029	0.0217	0.0131	0.0011	0.0001	0.001	0.001	0.001	0.001	0.001	0.001	0.001
20-29	6bp	0.001	0.001	0.001	0.001	0.001	0.001	0.001	0.001	0.001	0.0007	0.001	0.001	0.001	0.001	0.001	0.001	0.001	0.001	0.001	0.001
20-29	C/G	0.001	0.001	0.001	0.001	0.001	0.001	0.001	0.001	0.001	0.0011	0.0011	0.0005	0.001	0.001	0.001	0.001	0.001	0.001	0.001	0.001
20-29	4bp	0.001	0.001	0.001	0.001	0.001	0.0001	0.0001	0.001	0.0004	0.0042	0.0006	0.001	0.001	0.001	0.001	0.001	0.001	0.001	0.001	0.001
20-29	3bp	0.001	0.001	0.001	0.001	0.0002	0.001	0.001	0.0001	0.0012	0.0109	0.0005	0.0001	0.001	0.001	0.001	0.001	0.001	0.001	0.001	0.001
20-29	2bp	0.001	0.001	0.001	0.001	0.001	0.0001	0.0004	0.0017	0.0101	0.0627	0.0168	0.0027	0.0005	0.0002	0.0001	0.001	0.001	0.001	0.001	0.001
20-29	5bp	0.001	0.001	0.001	0.001	0.001	0.001	0.001	0.001	0.001	0.0025	0.0001	0.001	0.001	0.001	0.001	0.001	0.001	0.001	0.001	0.001
30-39	AC/GT	0.001	0.001	0.001	0.001	0.001	0.0002	0.0006	0.0018	0.0108	0.0807	0.0124	0.0011	0.0004	0.0002	0.0001	0.001	0.001	0.001	0.001	0.001
30-39	CA/TG	0.001	0.001	0.0001	0.0002	0.0001	0.0002	0.0004	0.0016	0.0099	0.0764	0.0121	0.0015	0.0004	0.0004	0.0001	0.0001	0.0001	0.001	0.001	0.001
30-39	A/T	0.001	0.0001	0.001	0.0001	0.001	0.0001	0.0002	0.0005	0.003	0.0239	0.0163	0.0011	0.0002	0.001	0.001	0.001	0.001	0.001	0.001	0.001
30-39	6bp	0.001	0.001	0.001	0.001	0.001	0.001	0.001	0.001	0.0001	0.0008	0.001	0.001	0.001	0.001	0.001	0.001	0.001	0.001	0.001	0.001
30-39	4bp	0.001	0.001	0.001	0.001	0.001	0.001	0.001	0.0004	0.0011	0.0076	0.0007	0.0003	0.0003	0.001	0.0001	0.001	0.001	0.001	0.001	0.001
30-39	3bp	0.001	0.001	0.001	0.001	0.001	0.0001	0.001	0.0002	0.0008	0.0154	0.0007	0.0001	0.001	0.001	0.001	0.001	0.001	0.001	0.001	0.001
30-39	2bp	0.001	0.001	0.001	0.001	0.0002	0.0004	0.0006	0.0025	0.0138	0.0669	0.0215	0.0042	0.001	0.0003	0.0001	0.001	0.0001	0.001	0.001	0.001
30-39	1bp	0.001	0.001	0.001	0.001	0.0002	0.0004	0.0006	0.0025	0.0138	0.0669	0.0215	0.0042	0.001	0.0003	0.0001	0.001	0.0001	0.001	0.001	0.001
30-39	5bp	0.001	0.001	0.001	0.001	0.001	0.001	0.001	0.001	0.0001	0.0014	0.0002	0.001	0.001	0.001	0.001	0.001	0.001	0.001	0.001	0.001
40-100	6bp	0.001	0.001	0.001	0.001	0.001	0.001	0.001	0.001	0.0007	0.0022	0.0004	0.0001	0.001	0.001	0.001	0.001	0.001	0.001	0.001	0.001
40-100	A/T	0.001	0.001	0.001	0.0001	0.0001	0.002	0.0002	0.0009	0.0052	0.0319	0.023	0.0031	0.0006	0.0002	0.0002	0.001	0.001	0.0001	0.001	0.001
40-100	4bp	0.001	0.001	0.001	0.001	0.001	0.001	0.001	0.0003	0.0018	0.0134	0.0031	0.0007	0.0003	0.001	0.001	0.001	0.001	0.001	0.001	0.001
40-100	3bp	0.0001	0.001	0.001	0.001	0.001	0.001	0.0001	0.001	0.0014	0.0208	0.0024	0.0001	0.001	0.001	0.001	0.001	0.001	0.001	0.001	0.001
40-100	2bp	0.001	0.001	0.0001	0.0001	0.0001	0.0002	0.0006	0.0029	0.0151	0.0876	0.0193	0.003	0.0006	0.0002	0.001	0.001	0.001	0.001	0.001	0.001
40-100	1bp	0.001	0.001	0.0001	0.0001	0.0001	0.0002	0.0006	0.0029	0.0151	0.0876	0.0193	0.003	0.0006	0.0002	0.001	0.001	0.001	0.001	0.001	0.001
40-100	5bp	0.001	0.001	0.001	0.001	0.001	0.001	0.0001	0.0001	0.0001	0.0033	0.0007	0.001	0.0003	0.001	0.001	0.001	0.001	0.001	0.001	0.001

## Sheet: Table S2
Table S2; Summary of identified mutations
ID	Cancer	Total number of analyzed informative microsatellite	Number of mutations in informative microsatellite	Mutation rate in informative microsatellite	Mutated microsatellite	Mutated microsatellite (proportion)	Cancer bam	Normal bam	Total number of analyzed microsatellite	Number of mutations in all microsatellite	Mutation rate in all microsatellite	Number of SNVs	Number of indels
301d6ce3-4099-4c1d-8e50-c04b7ce91450	BD	190958	88	0.0005	A/T;68|AC/GT;8|CA/TG;5|AG/CT;3|GA/TC;2|C/G;1|TA;1	A/T;0.7727|AC/GT;0.0909|CA/TG;0.0568|AG/CT;0.0341|GA/TC;0.0227|C/G;0.0114|TA;0.0114	f22a72c5-73c8-478d-b03e-04599b9d5321/PCAWG.67455c36-aa47-4cc4-8b6d-9a9012b616ed.bam	a6e8dd23-c8a5-445a-ae4b-b9f92ed6a73e/PCAWG.a833602e-7ee7-442b-9bf9-f6489cd64ba2.bam	7532562	150	2e-05	34256	1549
4838b5a9-968c-4178-bffb-3fafe1f6dc09	BD	145411	147	0.001	A/T;134|AC/GT;6|CA/TG;2|AT;1|C/G;1|GA/TC;1|TA;1|AG/CT;1	A/T;0.9116|AC/GT;0.0408|CA/TG;0.0136|AT;0.0068|C/G;0.0068|GA/TC;0.0068|TA;0.0068|AG/CT;0.0068	964bac8f-43cc-4a47-b233-53798d287029/PCAWG.13985b6b-d7b6-4efd-9c53-288f4d269a0c.bam	437e11a0-4137-4614-9f64-c5e798c8bb33/PCAWG.af830047-822a-4dcc-88bc-68f7440a208d.bam	6472671	209	3e-05	20993	1943
c66c92d5-df65-46e6-861d-d8a98808e6a3	BD	148801	161	0.0011	A/T;139|AC/GT;7|CA/TG;6|C/G;3|AG/CT;3|AT;2|GA/TC;1	A/T;0.8634|AC/GT;0.0435|CA/TG;0.0373|C/G;0.0186|AG/CT;0.0186|AT;0.0124|GA/TC;0.0062	fa36e89d-55b8-4c72-9392-80113efde076/PCAWG.c878fe80-0a2e-43d2-ab62-1214fc34c282.bam	416911eb-e10f-4edd-8f07-5e87b0228a11/PCAWG.066b5025-1a70-4db4-bd98-964b8c9939c3.bam	6488432	235	4e-05	4581	1383
973d0577-8ca4-44a1-817f-1d3c1bada151	BD	164637	235	0.0014	A/T;220|C/G;5|CA/TG;4|AC/GT;3|TA;2|AG/CT;1	A/T;0.9362|C/G;0.0213|CA/TG;0.017|AC/GT;0.0128|TA;0.0085|AG/CT;0.0043	b2a9fda3-15e8-4a8b-8a8a-195d72573423/PCAWG.c3ffa75b-de27-4cc6-b713-b32c51f5bee5.bam	d2e25eb8-8899-4ba5-a2f1-0a69ba97cef2/PCAWG.bd9f7681-6ed4-4f60-8db9-eb7ab0d4a7e7.bam	6943771	342	5e-05	15037	2021
91f458e6-64b7-454d-a542-b0aa23638fd8	BD	144111	171	0.0012	A/T;150|CA/TG;6|C/G;6|AC/GT;3|AT;2|AG/CT;2|GA/TC;1|TA;1	A/T;0.8772|CA/TG;0.0351|C/G;0.0351|AC/GT;0.0175|AT;0.0117|AG/CT;0.0117|GA/TC;0.0058|TA;0.0058	6c60027c-18c8-444e-816d-a482d1591783/PCAWG.4fa2be0e-2789-43ab-9252-9142fa6a8b73.bam	24f09372-c73f-4b14-a4c4-f317cd5a7183/PCAWG.66ae8aa3-0f01-44b2-9cae-5fde3a5bf31f.bam	6359293	256	4e-05	22082	2816
8c619cbc-9e91-4716-9711-5236e55d8f46	BD	181621	160	0.0009	A/T;138|AC/GT;6|CA/TG;6|TA;5|C/G;2|AG/CT;2|AT;1	A/T;0.8625|AC/GT;0.0375|CA/TG;0.0375|TA;0.0313|C/G;0.0125|AG/CT;0.0125|AT;0.0063	e5571614-9944-4cd2-923e-f58cacc2ec75/PCAWG.4fca38ac-cba9-48a6-8fdc-d04e2226980b.bam	1162579b-c7c6-4cbe-8eac-f245377e8156/PCAWG.4afe0dad-2080-4d17-844f-0c86be031952.bam	7391933	245	3e-05	10312	1408
abd2d959-d5ed-4eb3-9759-67eb1aa23325	BD	173942	98	0.0006	A/T;78|GA/TC;6|CA/TG;5|AG/CT;3|AC/GT;2|C/G;2|TA;2	A/T;0.7959|GA/TC;0.0612|CA/TG;0.051|AG/CT;0.0306|AC/GT;0.0204|C/G;0.0204|TA;0.0204	acbca92d-d886-4bcd-b6ce-05db5be21540/PCAWG.593af649-e5c3-41a4-b02e-7b441b6490a1.bam	bba259e2-97c7-49c1-9ed3-2dcedd85038e/PCAWG.28821945-931e-4151-893d-f955882a6e70.bam	7172973	153	2e-05	15374	1940
0c7aca3f-e006-4de3-afc2-20b4f727d4fd	BD	180598	120	0.0007	A/T;100|AC/GT;7|CA/TG;4|C/G;3|AT;2|AG/CT;2|GA/TC;1|TA;1	A/T;0.8333|AC/GT;0.0583|CA/TG;0.0333|C/G;0.025|AT;0.0167|AG/CT;0.0167|GA/TC;0.0083|TA;0.0083	2b806207-94e0-4bd9-8365-24b6609158d9/PCAWG.2a1f418f-995a-4881-8908-233aa753ff7e.bam	3a1c12d7-cfca-4313-a4d2-7560e5db2351/PCAWG.e8fec5b5-471d-46aa-bcaa-432e3763be53.bam	7340849	201	3e-05	17400	1481
2b142863-b963-4cc9-8f8f-c72503c93390	BD	167985	171	0.001	A/T;148|CA/TG;9|AC/GT;4|C/G;3|AG/CT;3|TA;2|AT;1|GA/TC;1	A/T;0.8655|CA/TG;0.0526|AC/GT;0.0234|C/G;0.0175|AG/CT;0.0175|TA;0.0117|AT;0.0058|GA/TC;0.0058	78c19361-fdf6-4329-995f-2224cb9d5f9b/PCAWG.556cea63-34dd-4a32-b415-cf47e8b0cb5b.bam	b0922230-67ac-4cf2-b109-17d0af4f0ac2/PCAWG.5a1ebe5d-5436-4b3e-aa2e-51f5ce84193f.bam	7042889	283	4e-05	27489	1702
45a7949d-e63f-4956-866c-df51257032de	BD	171785	80	0.0005	A/T;65|AC/GT;5|CA/TG;5|AG/CT;3|C/G;1|GA/TC;1	A/T;0.8125|AC/GT;0.0625|CA/TG;0.0625|AG/CT;0.0375|C/G;0.0125|GA/TC;0.0125	8b1146c1-f63b-4ef0-81e5-91e4608e0ecc/PCAWG.8e6e337b-b6ea-41a4-adf2-c1528616bdfb.bam	dca27f4e-4925-4ac9-9642-15fc6bd5129d/PCAWG.adcec9cf-9354-4432-b734-b4de2e366294.bam	7010522	111	2e-05	25277	1207
acc629cb-ad03-4cec-9b21-922e4932ef3e	BD	185562	94	0.0005	A/T;81|AC/GT;5|GA/TC;3|CA/TG;2|TA;2|C/G;1	A/T;0.8617|AC/GT;0.0532|GA/TC;0.0319|CA/TG;0.0213|TA;0.0213|C/G;0.0106	a08ea303-0fb2-4241-bebc-567a1e14d047/PCAWG.218ea522-6b61-43a5-b5e1-bfb6afa0a338.bam	84f3cbf3-8181-48b9-af7b-abffa5f57028/PCAWG.2aafaa5c-f5c6-493c-b51a-9707d739b8ba.bam	7332901	135	2e-05	15783	1251
d4615ca0-b5c7-4a5c-8593-bd50034a78ae	BD	196493	453	0.0023	A/T;436|C/G;6|CA/TG;3|AT;2|AC/GT;2|TA;2|GA/TC;1|AG/CT;1	A/T;0.9625|C/G;0.0132|CA/TG;0.0066|AT;0.0044|AC/GT;0.0044|TA;0.0044|GA/TC;0.0022|AG/CT;0.0022	f18a77ba-0959-43eb-8fbb-e4cb7964dd99/PCAWG.25c5a60f-61fd-4177-a3b6-e47d26c1780b.bam	b5d87b26-e67a-46f5-911a-360694194fa3/PCAWG.2aae8471-bb09-406e-aa77-2f6e3ddf2308.bam	7611529	601	8e-05	15674	2423
448fe471-3f4e-4dc8-a4e0-6f147dc93abe	BD	164686	101	0.0006	A/T;80|AC/GT;10|CA/TG;5|AT;2|GA/TC;2|TA;1|AG/CT;1	A/T;0.7921|AC/GT;0.099|CA/TG;0.0495|AT;0.0198|GA/TC;0.0198|TA;0.0099|AG/CT;0.0099	6e822923-4f29-4373-97c5-1b116de02c19/PCAWG.ab3835bc-98d7-48c4-ac43-94b4d486591f.bam	303b3499-b5f3-4279-8cbf-6786c5e703ac/PCAWG.cee6c740-a965-42d3-a009-60fd09ccbd5d.bam	6927347	168	2e-05	36959	1396
cda1a403-16b6-487c-a82a-c377d1d0f89d	BD	174864	266	0.0015	A/T;241|CA/TG;7|AC/GT;4|GA/TC;4|C/G;4|AT;3|TA;2|AG/CT;1	A/T;0.906|CA/TG;0.0263|AC/GT;0.015|GA/TC;0.015|C/G;0.015|AT;0.0113|TA;0.0075|AG/CT;0.0038	8f89bf0a-7add-409e-a39d-78f168f21ed7/PCAWG.b6c91d5a-d4a2-4147-a279-fd7bb9c828db.bam	fa69fea6-05f1-4c3f-82b0-969b5477d220/PCAWG.3972cca7-91dc-4a27-9608-17c35cc4eb48.bam	7220015	381	5e-05	41148	2092
df8a913c-5160-4fc5-950d-7c890e24e820	BD	159351	186	0.0012	A/T;170|AC/GT;5|CA/TG;5|AG/CT;4|GA/TC;1|C/G;1	A/T;0.914|AC/GT;0.0269|CA/TG;0.0269|AG/CT;0.0215|GA/TC;0.0054|C/G;0.0054	36e8af42-fb66-44ca-b9ca-29100a67ba90/PCAWG.17d4ede4-41e3-4ebe-9081-8bc49ab5661a.bam	7acfbf62-1ae5-4b33-874a-5906cf9a6f3e/PCAWG.8524cdf9-fabc-4eb9-8561-670f7f5c2928.bam	6726662	308	5e-05	37962	1959
418a3dec-96ff-4719-becb-e1a8260cce2f	BD	186541	139	0.0007	A/T;122|CA/TG;4|C/G;4|AC/GT;3|AT;2|GA/TC;2|AG/CT;2	A/T;0.8777|CA/TG;0.0288|C/G;0.0288|AC/GT;0.0216|AT;0.0144|GA/TC;0.0144|AG/CT;0.0144	4d7785f6-029f-45e0-839a-e2e769cb7051/PCAWG.c6b00ff6-e405-49e7-80cd-3964fc3221dd.bam	09c46728-a8e2-4848-9721-049231234bce/PCAWG.20e33f07-681e-4a7a-8764-fd17bf0fbf43.bam	7451459	292	4e-05	40742	3027
b73523d7-f5a5-4140-8537-4df4d1ecf465	BD	178317	177	0.001	A/T;155|AC/GT;10|CA/TG;5|TA;4|C/G;2|GA/TC;1	A/T;0.8757|AC/GT;0.0565|CA/TG;0.0282|TA;0.0226|C/G;0.0113|GA/TC;0.0056	963386d2-8873-4b34-8d61-69e87fd5c2b8/PCAWG.5c56e7c5-4c5b-4435-8a2b-77fcab52257b.bam	be8858ff-a51b-4848-a0ec-20b3537bd640/PCAWG.f78b4954-8a49-4626-be74-755d5ec999e1.bam	7350272	291	4e-05	55968	2378
ffdd4feb-aca3-4104-b1e8-954d705a6450	BD	167624	157	0.0009	A/T;135|CA/TG;7|AC/GT;6|C/G;5|AG/CT;2|GA/TC;1|TA;1	A/T;0.8599|CA/TG;0.0446|AC/GT;0.0382|C/G;0.0318|AG/CT;0.0127|GA/TC;0.0064|TA;0.0064	b0e7dd53-4a1b-4af5-9dc9-659c404439e2/PCAWG.9a2bc4e4-e700-4f90-b888-dad8d97beed4.bam	d7fbcb86-a466-49ce-85b0-db17687e4bb9/PCAWG.4716a71d-624f-4588-8005-589c226410e0.bam	7051158	237	3e-05	13436	1793
94108975-b7a0-40ba-ad39-e44cc62e8cc0	BD	158262	141	0.0009	A/T;130|AT;3|C/G;3|AC/GT;2|CA/TG;2|GA/TC;1	A/T;0.922|AT;0.0213|C/G;0.0213|AC/GT;0.0142|CA/TG;0.0142|GA/TC;0.0071	e9db87d3-8323-431f-b164-5605dd60b8b9/PCAWG.98bf2e5d-444d-43e0-b1ac-7ee699053fe5.bam	7b51785f-541a-460e-adf4-f8a4f1d68675/PCAWG.0d3d331c-a865-4ed2-8703-075e0a61501c.bam	6676597	283	4e-05	65247	2281
e6c78a98-f45b-482b-a551-4f11b8c1ff8b	BD	184311	140	0.0008	A/T;123|AC/GT;6|CA/TG;6|C/G;2|AG/CT;2|GA/TC;1	A/T;0.8786|AC/GT;0.0429|CA/TG;0.0429|C/G;0.0143|AG/CT;0.0143|GA/TC;0.0071	254ca054-420b-4abf-85d2-9f35aa04b64f/PCAWG.1834407e-34ba-44fa-81f8-b51fe842553f.bam	4a023844-e7e8-4345-bb25-b7e2fdbbe23d/PCAWG.d03a26d6-b3e4-4301-95e6-df28f01634f9.bam	7368326	197	3e-05	11785	1347
7d2a22eb-7344-4cba-ad7d-94c3f9ef3d7c	BD	167956	104	0.0006	A/T;91|AC/GT;8|CA/TG;2|GA/TC;1|C/G;1|AG/CT;1	A/T;0.875|AC/GT;0.0769|CA/TG;0.0192|GA/TC;0.0096|C/G;0.0096|AG/CT;0.0096	234502bb-df30-427a-9644-c0c02afd3247/PCAWG.821db16f-94b9-4246-a4bc-f9453bf2119d.bam	c78a221c-aaf8-4a2a-82fa-429031ea9815/PCAWG.4d2df6dd-ac02-41a3-a00d-8d0f3873d212.bam	7004926	158	2e-05	10935	1028
PD7190a	BS	198407	39	0.0002	A/T;38|AC/GT;1	A/T;0.9744|AC/GT;0.0256	f87f8019-db9f-46d0-9e39-d16a37646815/1faf4818aef944ccd0cea1553aa19f55.bam	eda9dfda-2700-4283-b853-c760501fd2f4/ae4b28479dc6652ba00a73ec76c8be95.bam	7646238	73	1e-05	13718	1250
PD7193a	BS	181019	17	0.0001	A/T;17	A/T;1	4d1fcef5-9c33-4852-963e-00dc2393eaf2/3bff6fb6d22946b29f935e60def05e65.bam	d45ec707-a0a0-439b-a3d4-fbb0eae80961/526545cc9e38dc6c354a8c6aacb52893.bam	7081458	34	0	6161	579
PD7195a	BS	169268	80	0.0005	A/T;80	A/T;1	851e827c-7baa-4f4c-8723-e76d3e6acf55/0e5a3377f656e2c83c7cd65a664fbe1e.bam	f9f498a1-0293-488b-b634-b728f3bdcd73/2aaf3eee5c612b9fd1507722dcaf91ab.bam	6658780	122	2e-05	4992	1166
PD7196a	BS	192763	21	0.0001	A/T;17|AT;2|CA/TG;1|C/G;1	A/T;0.8095|AT;0.0952|CA/TG;0.0476|C/G;0.0476	f00ee221-f51c-4fa9-bb62-8cb08a141bcd/e4bab214f06cb0664d4bb265fc3b9a1f.bam	31e7b4c4-d33a-4db0-a17f-e386e8fde19e/33302efeeb0492bb17828bc81b594ba7.bam	7460789	34	0	10840	1093
PD7197a	BS	192205	31	0.0002	A/T;30|CA/TG;1	A/T;0.9677|CA/TG;0.0323	b6cf3e41-3c1f-43df-adf0-b73ddbe92c45/27c6e06f744eb004af32433d957588a4.bam	acc6d226-0b42-4bfd-9158-46910ed80be2/e9b2cbc302dbb6ff2c7f1383b84df9f5.bam	7469486	67	1e-05	7405	688
PD7401a	BS	195255	3	0	A/T;2|AT;1	A/T;0.6667|AT;0.3333	bca3550c-a7af-444e-ad29-09722f4a4361/a8f33eb6ca9e93900208de2780e02b65.bam	f85f3ec1-1a5a-475e-91bc-3f683c6d7b09/9e9d5f8b4e50da0d117e0865fcba745c.bam	7554452	7	0	3919	534
PD7507a	BS	190965	142	0.0007	A/T;136|AC/GT;2|C/G;2|AT;1|GA/TC;1	A/T;0.9577|AC/GT;0.0141|C/G;0.0141|AT;0.007|GA/TC;0.007	b91f34e7-5004-4845-b125-b90af522c343/84efc0fa997bb145da8558ce3742bd13.bam	1cae13a7-5c58-4790-a08a-8f56cfa74339/904daae70c72674cf7bc5c1ad7c70220.bam	7430396	225	3e-05	16978	1402
PD7508a	BS	193361	22	0.0001	A/T;21|C/G;1	A/T;0.9545|C/G;0.0455	4023faaf-c73d-4587-a888-1c700fda100b/92a65acef03597a1e00eff319bde3b44.bam	fc8d56d8-6cbb-4f2b-a956-055640f78453/ccd3b76afff94a26333b2740b960a1e5.bam	7489822	37	0	8653	795
PD7509a	BS	194199	32	0.0002	A/T;30|CA/TG;1|AATGG/CCATT;1	A/T;0.9375|CA/TG;0.0313|AATGG/CCATT;0.0313	c6d615d0-dfc3-4424-8e00-aa697a3a9992/a04fc9ba29fc9e7379fa29bd2d1308b5.bam	555493e7-2612-4522-8023-8f9544b31557/1d826b27a356a722e26e97c0cf85ad29.bam	7551926	57	1e-05	5052	517
PD7510a	BS	196149	27	0.0001	A/T;26|AC/GT;1	A/T;0.963|AC/GT;0.037	6746a54b-ae2e-49e4-84b7-02da86b3ec4a/d71e49c6637a497f14f36938e772a1b0.bam	3ddf3333-98eb-4eea-9d39-7eca4af3c810/5a5a4d48f56d863a291e464b754dd794.bam	7590802	47	1e-05	7260	848
PD7511a	BS	194289	91	0.0005	A/T;82|C/G;7|AC/GT;1|TA;1	A/T;0.9011|C/G;0.0769|AC/GT;0.011|TA;0.011	1da94974-e018-4af7-a34b-de4701d324d5/ec1dbea57e3bbb155f7ea6f42cfd6b91.bam	2e594b5c-2f7f-45ee-b863-4467d665042b/033ecbdb2c27445b9e507feca1e3e2d9.bam	7529833	127	2e-05	7192	1061
PD7512a	BS	187510	19	0.0001	A/T;17|CA/TG;1|C/G;1	A/T;0.8947|CA/TG;0.0526|C/G;0.0526	6822bbf9-827d-4dc7-a37e-636836152edb/737c12717376b6251b3b6664d8e6df2d.bam	ccbbc482-8be8-4140-97a5-71fad2f2f8a1/3af809864aceb41b5fc027cc828d1b3e.bam	7320264	33	0	2702	532
PD7513a	BS	196502	13	0.0001	A/T;13	A/T;1	e0467d1f-96f9-4445-a700-b7f6af185ca4/a9130c0f035dfa94adda3314ab79200b.bam	cca8ddac-3bb6-4606-9a55-802fdb75790d/a482171b01d1d7917bec6ac1ecd4767a.bam	7597991	19	0	3707	619
PD7514a	BS	196024	10	0.0001	A/T;8|C/G;2	A/T;0.8|C/G;0.2	c51af6e1-8263-425a-b32a-9852989eacef/b263024d58d3aa9820185e051e77eedf.bam	44a68476-03ff-4715-9c25-de16ac2d3d22/56e9ea4825d86f21a3fa9804bc198e86.bam	7593932	26	0	3385	529
PD7515a	BS	196209	2	0	A/T;2	A/T;1	0e203e50-239e-4976-88c3-f8ee2715780b/45749c94a678e8181af728ac726b068d.bam	befa969c-d3b3-4e04-bf79-666cb4cf74b9/08f4328f1b8bcf45a332ffe896531b03.bam	7595829	2	0	2290	386
PD7516a	BS	195508	3	0	A/T;3	A/T;1	b3b3559d-67e6-4216-99b8-6df3ace9a399/8d35619347952f08d81bcd78beb4e64e.bam	ff92c2f2-9ba2-4e06-ae36-556ece3b0228/f665fc5c67b645d3038770c49c02fb02.bam	7580769	5	0	2464	382
PD7517a	BS	194507	7	0	A/T;6|CA/TG;1	A/T;0.8571|CA/TG;0.1429	122a0ad0-76b9-4235-9b29-0bc7102cd3d7/6e7be063c5e91a802c89888fbf52ae82.bam	c1e328ee-7029-42b8-9365-321779ca5a91/1403d82072da188ee2ef6db37285bd6e.bam	7485835	11	0	2261	473
PD7518a	BS	198145	7	0	A/T;6|TA;1	A/T;0.8571|TA;0.1429	27164dce-5f26-401e-9797-0846f7cf5a8e/60a3cf48c26b669f40162394322a3510.bam	94293801-eca1-4c57-a5ab-e66aae700644/2636fd0eda99f4e7eb69d28317606ab9.bam	7642014	12	0	2144	252
PD7519a	BS	198027	2	0	A/T;2	A/T;1	a1e0fc29-354e-4cf6-aa37-cca0dcc5db7e/9791e68368e8e21636cf9e629d6fafaf.bam	0754c826-98a8-4a18-8348-2c576cc53d07/65c7e989be4c8c6a606815d3a3a91b3c.bam	7639600	2	0	2153	265
PD7520a	BS	197082	5	0	A/T;4|GA/TC;1	A/T;0.8|GA/TC;0.2	fff2315d-7a73-49a9-9d98-68adb362afb0/5a438ed8caed09cbfca982097ed9d0db.bam	07fefc07-b24b-49b9-9118-69975be52a5d/1b6fabec9b3deec470696335c32d5f8a.bam	7620322	10	0	2178	297
PD7521a	BS	196310	2	0	CA/TG;1|C/G;1	CA/TG;0.5|C/G;0.5	39ab83d9-7473-44c0-95c9-ad5582c0db69/43c8f3d198f91c369c5a17a5dd33a81a.bam	96e252b8-911a-44c7-abc6-b924845e0be6/7d743b10ea1231730151b2c9d91c527f.bam	7563559	3	0	1833	267
PD7522a	BS	196625	6	0	A/T;5|C/G;1	A/T;0.8333|C/G;0.1667	c5522620-e4c8-4e35-a6fa-67a781391ac7/4279b93ee06b0dd52f5609d2bedf34f8.bam	ba1dac3a-aef9-4392-998c-ff478241de72/abca37398ecaf8947b48eaa60680586a.bam	7606988	10	0	2564	446
PD7523a	BS	197266	6	0	A/T;5|GA/TC;1	A/T;0.8333|GA/TC;0.1667	71383775-7b5e-41ba-8088-35cf6776b1aa/edbec27d86e3c619ca715ad6674ddb5c.bam	dd8dd612-b936-46b9-9fa0-54dab3780304/0f2af469789af057c1f5f9a7f82f5d61.bam	7580565	10	0	6494	609
PD7524a	BS	195790	4	0	A/T;4	A/T;1	4d0c84a4-af47-4d0c-9853-bb0a30537457/3d43086bf3f2f3b11bcf56734a311856.bam	b8a9396c-f579-4397-8104-7d477d353fb2/da63f508497e0e28f0eda0c2d9af8770.bam	7457213	9	0	4390	469
PD7525a	BS	198248	2	0	A/T;2	A/T;1	12be9397-3696-47ef-aeac-988bf140f35b/a2f4ff3ba0c9e71c5402708fe2c4856e.bam	c82f95c2-6162-4c59-912c-e452c7b1d6d6/e32d22509a2624304a38e9b125db46ac.bam	7625861	4	0	2583	319
PD7527a	BS	197047	2	0	A/T;2	A/T;1	9e7fe4e2-09cb-486e-a81e-9a6f7ece2257/0492040c731fd42381efe0d8cc3d2e6e.bam	96b357a6-069f-4eca-ac92-f01279cc0e37/4d4764559b73b3ee5dd35a79b7bbdba7.bam	7613677	4	0	3163	502
PD7528a	BS	197019	15	0.0001	A/T;14|C/G;1	A/T;0.9333|C/G;0.0667	db21cb5c-8c07-4be9-9e2b-d83f8092e470/aabda85231d136c38b4502929ad9d7d4.bam	14cf5f9f-537e-47b5-a991-a78a8efda47d/d4c15c2dfe7fb1bdea5c15ff8cae8bd8.bam	7610306	30	0	4408	410
PD7529a	BS	195832	7	0	A/T;7	A/T;1	1782c590-3083-4302-a665-bb0cf75d8ecc/7c25af594cf4da27ef5cb975c59ca32a.bam	207b41b6-d92c-484f-a532-0557de567f18/da0701a0d76c793c44c6d0fe304c2b4c.bam	7581393	12	0	3027	392
PD9056a	BS	179236	17	0.0001	A/T;16|C/G;1	A/T;0.9412|C/G;0.0588	2769c4cf-b1a9-41c8-b597-0cda975f4a80/396a997ff0bd81dfcbebe6a889d7b494.bam	64f4e1ca-9724-460e-89e1-7238900ab01c/c15e37a7f556c4c3bbf262d0255d27d7.bam	7064457	43	1e-05	7403	1215
PD9402a	BS	190192	97	0.0005	A/T;89|AC/GT;4|TA;2|CA/TG;1|AG/CT;1	A/T;0.9175|AC/GT;0.0412|TA;0.0206|CA/TG;0.0103|AG/CT;0.0103	e1eca6c9-5111-4ba2-ae80-2b3a5be3e659/1612f8544dc963747e394d5fac768b86.bam	3994022f-41f3-406a-8982-a71b0bce4e7f/08e0e137249c5ff8de518b4788eff356.bam	7421878	155	2e-05	9333	1401
PD9408a	BS	191490	53	0.0003	A/T;39|CA/TG;6|AC/GT;3|AT;2|GA/TC;2|TA;1	A/T;0.7358|CA/TG;0.1132|AC/GT;0.0566|AT;0.0377|GA/TC;0.0377|TA;0.0189	964ff278-3259-4daa-897f-3b0546b1bd5c/7cdcbaec9488b2447573750e1d1bad59.bam	c414eae3-d330-4223-b093-cbec65341815/a275f6564a00ef628ff79cbd16bddd42.bam	7467687	63	1e-05	5411	885
PD9962a	BS	186564	76	0.0004	A/T;65|AC/GT;7|CA/TG;1|C/G;1|TA;1|AG/CT;1	A/T;0.8553|AC/GT;0.0921|CA/TG;0.0132|C/G;0.0132|TA;0.0132|AG/CT;0.0132	ecefda8e-2384-484a-aa6e-1476d4787712/9deb46a544af23b56f8ef67c805d27ca.bam	119a6bb2-aeb5-47ed-a58b-7fc90465197c/4e2a90096443c03100f9f26633636332.bam	7292058	108	1e-05	13093	1729
PD9969a	BS	194511	33	0.0002	A/T;19|CA/TG;6|AC/GT;5|AT;2|GA/TC;1	A/T;0.5758|CA/TG;0.1818|AC/GT;0.1515|AT;0.0606|GA/TC;0.0303	7ffbb347-f39a-4cc3-9268-19838fd4dc05/cbb366530e07ffe759133f09f874b9b2.bam	d40b4ccc-0fbf-4829-b89d-817b53c839c0/97ecece74ac1d2cfb04450f36b71959a.bam	7533453	37	0	5380	831
PD9972a	BS	189283	45	0.0002	A/T;37|CA/TG;4|AC/GT;3|C/G;1	A/T;0.8222|CA/TG;0.0889|AC/GT;0.0667|C/G;0.0222	bbab75ef-2468-4108-90de-83da6690e769/6d791476bd00844cfe505b92fbbd2e17.bam	3d50377a-c58a-4505-9678-14004ebb82e6/561249f63b7b65807ce0aeec745572e2.bam	7399967	74	1e-05	9125	967
PD9979a	BS	184319	77	0.0004	A/T;61|AC/GT;8|CA/TG;4|GA/TC;2|C/G;2	A/T;0.7922|AC/GT;0.1039|CA/TG;0.0519|GA/TC;0.026|C/G;0.026	f028021d-1aa5-4a7c-bbba-96431557490c/852c8f01b65d51b2ed01adfa15d88ad7.bam	9144614c-6e81-4976-814d-b76ac005cc4c/902916bdf3467ba69b91a37fb2dd8653.bam	7245589	99	1e-05	4300	796
PD11411a	BS	192057	77	0.0004	A/T;75|C/G;2	A/T;0.974|C/G;0.026	8d0ac9ca-726d-4718-9ac4-653245130ca5/368dbc1d6bafe7ff0fba385888821b89.bam	8388cc98-9843-4d03-8f57-222fbee892a4/5b9fdbbabb2e1856a80b571147e503c9.bam	7344147	108	1e-05	8015	1463
PD11424a	BS	193696	27	0.0001	A/T;25|C/G;2	A/T;0.9259|C/G;0.0741	e4046517-331f-4813-865a-184ec2eee1cb/39e6b1b736b9dbc108415c59737bd43f.bam	9b140ebc-d555-4211-9393-a4b4faacfca7/9f9361039a8e981aedfe4c73fabcc361.bam	7499922	51	1e-05	6737	804
PD13450a	BS	195391	40	0.0002	A/T;36|AC/GT;3|CA/TG;1	A/T;0.9|AC/GT;0.075|CA/TG;0.025	dd6493e4-2438-4907-ac52-55c861d4e5e0/85d645c6314537ac6e866015774762c7.bam	619b4b29-6595-40b5-b8df-929bf2fea2ec/32981effa9d331ff9d054d26e2e888d0.bam	7551315	55	1e-05	3207	767
PD13453a	BS	196555	52	0.0003	A/T;36|AC/GT;10|CA/TG;4|AT;1|GA/TC;1	A/T;0.6923|AC/GT;0.1923|CA/TG;0.0769|AT;0.0192|GA/TC;0.0192	c2d93b9d-2c03-489d-a0e0-d6b59dcbe300/73f825482719b1f8069820746de863ef.bam	1f25b6a2-506f-4a3d-948c-69e808d9355f/538f75ab8d470b4e87beec9dc53b0255.bam	7595513	53	1e-05	1722	785
PD13457a	BS	197721	42	0.0002	A/T;27|AC/GT;5|CA/TG;4|TA;2|AT;1|AAG/CTT;1|C/G;1|AG/CT;1	A/T;0.6429|AC/GT;0.119|CA/TG;0.0952|TA;0.0476|AT;0.0238|AAG/CTT;0.0238|C/G;0.0238|AG/CT;0.0238	362fa54c-e5f1-4b22-bee0-eb933cf5e4b4/a56fab4ed827c92e715ccb91a7e96515.bam	ec24ac98-8add-4870-be63-7b7b680a0dab/cb36b35626939237ec61c9acfd77222c.bam	7625897	44	1e-05	1871	698
PD13459a	BS	194355	37	0.0002	A/T;26|AC/GT;5|CA/TG;2|AG/CT;2|AT;1|GA/TC;1	A/T;0.7027|AC/GT;0.1351|CA/TG;0.0541|AG/CT;0.0541|AT;0.027|GA/TC;0.027	f9647cae-c4b6-4ed4-bf8e-8b837d71612e/c6bdd06336129077a0a94fe4d5950a55.bam	c9454e13-6007-4b30-a138-711f50fa42e6/65f51c0929458bfc0a88c39a4fc14106.bam	7547095	37	0	1643	849
PD13460a	BS	194929	36	0.0002	A/T;24|AC/GT;4|CA/TG;4|TA;2|AT;1|AG/CT;1	A/T;0.6667|AC/GT;0.1111|CA/TG;0.1111|TA;0.0556|AT;0.0278|AG/CT;0.0278	1d00c93d-9aab-46fd-ab57-96dfc2975189/c1deb1f406b763366df4041ef8ce25e2.bam	0eeb0b6f-eb4e-48fd-907b-259aeff46363/81b02f66883d5502793983c48a3ab79d.bam	7554480	41	1e-05	4055	1205
PD13461a	BS	197564	22	0.0001	A/T;17|CA/TG;3|AC/GT;1|C/G;1	A/T;0.7727|CA/TG;0.1364|AC/GT;0.0455|C/G;0.0455	08e478a7-64c7-4543-91f3-230c4a86a752/82e6e2ca15fb85c2bea281845a8978e3.bam	b594e431-a35a-4b04-b2ae-11235961a275/6becf07f2d05fcaa974dea2302411117.bam	7626576	25	0	1263	388
PD13462a	BS	196319	40	0.0002	A/T;33|AC/GT;3|CA/TG;3|TA;1	A/T;0.825|AC/GT;0.075|CA/TG;0.075|TA;0.025	a8ac1017-fdf8-476a-8a5b-528a69225393/4e12c76d0d05b45c8391266d06ddc22b.bam	27197561-03a2-455e-a4c7-292a6b89f77b/ce4afaafd87c53846d56bf3148d730c1.bam	7586394	59	1e-05	4263	661
PD13463a	BS	197417	34	0.0002	A/T;29|AC/GT;2|AT;1|CA/TG;1|TA;1	A/T;0.8529|AC/GT;0.0588|AT;0.0294|CA/TG;0.0294|TA;0.0294	4089c19a-ec98-4379-bd03-3433ad73e1cb/943d211159674c1f2973bba9840a7e02.bam	b63b3176-1230-46f9-9fa4-c1884e95296c/83ab7ac530b2ee0a6cb195df8d884492.bam	7618190	49	1e-05	3656	543
PD13464a	BS	192194	67	0.0003	A/T;56|AC/GT;5|CA/TG;2|AT;1|C/G;1|GA/TC;1|AG/CT;1	A/T;0.8358|AC/GT;0.0746|CA/TG;0.0299|AT;0.0149|C/G;0.0149|GA/TC;0.0149|AG/CT;0.0149	a04fce14-890f-4ea6-955d-a566de144561/4c416d4b3a1e6e3b341a251a93064e41.bam	d39f6c4c-4992-4bda-a12e-20f10363fe5f/8fa15ee32cf3bd6aa032b33726b06941.bam	7473910	86	1e-05	4433	834
PD13467a	BS	182909	54	0.0003	A/T;37|AC/GT;8|CA/TG;4|TA;2|GA/TC;1|C/G;1|AG/CT;1	A/T;0.6852|AC/GT;0.1481|CA/TG;0.0741|TA;0.037|GA/TC;0.0185|C/G;0.0185|AG/CT;0.0185	d7eda28f-c885-407d-a2e8-415fb0200815/7cf2ebd8e80ff23ddd2f67f124dc7fb3.bam	d6b836d7-a1b2-437c-b8a2-e106471d2086/04b7f00d324578492295b02ee57179bd.bam	7122679	57	1e-05	3504	1178
PD13468a	BS	174174	19	0.0001	A/T;16|CA/TG;3	A/T;0.8421|CA/TG;0.1579	1942d206-4827-4d8a-8a2a-9032b188634a/8b3385319133789bb729439c79df03bc.bam	9a59c6ee-7e01-46f5-b054-7b2afc6e4f34/7310c8bc561e2655033297a71ff14a8b.bam	6825625	25	0	6548	1653
PD13472a	BS	195667	35	0.0002	A/T;24|CA/TG;5|AC/GT;3|GAA/TTC;1|C/G;1|TA;1	A/T;0.6857|CA/TG;0.1429|AC/GT;0.0857|GAA/TTC;0.0286|C/G;0.0286|TA;0.0286	c33c796f-d493-4981-ac31-6f5c6d18ac43/b2adc35a1d62489b6af415400c742851.bam	3e26378b-afbb-4d59-a12a-dc1524d54a30/2b9baf71b2c4ab5b2872bd24e16a06ab.bam	7561040	42	1e-05	2247	735
PD13474a	BS	198065	23	0.0001	A/T;15|AC/GT;3|TA;2|CA/TG;1|GA/TC;1|AG/CT;1	A/T;0.6522|AC/GT;0.1304|TA;0.087|CA/TG;0.0435|GA/TC;0.0435|AG/CT;0.0435	2e8f1a84-430d-4591-ab68-d8bf7bfe00fe/747351fcbce916b22cf23184412d039e.bam	cd235220-7766-4e55-a7a5-7dc993beb2dc/3b5374f10b49f1e771f1b33283509d9c.bam	7635743	25	0	1765	496
PD13475a	BS	192852	41	0.0002	A/T;27|CA/TG;6|AC/GT;4|AG/CT;2|AT;1|GA/TC;1	A/T;0.6585|CA/TG;0.1463|AC/GT;0.0976|AG/CT;0.0488|AT;0.0244|GA/TC;0.0244	7d2a2c79-c5c8-4c88-8a37-eb328d444b05/92d0f260ad53a5ed645be623dc5cf2f5.bam	149d6e14-045d-4a12-8456-305b2c5a8984/4aa11a11436b34fee62ac56e815db5e1.bam	7488114	49	1e-05	1328	705
PD13476a	BS	194055	71	0.0004	A/T;57|AC/GT;5|CA/TG;4|C/G;3|AT;2	A/T;0.8028|AC/GT;0.0704|CA/TG;0.0563|C/G;0.0423|AT;0.0282	4f843535-9a54-4837-8d62-70102227d2e5/5dda89740ba3a860861bdfaea3ed2cab.bam	db6dda9d-7b39-4381-abc8-e60b4f9a3580/55928e15f8fb7864bd7c54acff475dd9.bam	7538601	95	1e-05	12296	1202
PD13477a	BS	198018	30	0.0002	A/T;21|AC/GT;6|GA/TC;2|CA/TG;1	A/T;0.7|AC/GT;0.2|GA/TC;0.0667|CA/TG;0.0333	e5cd99fd-23be-494f-898a-8151c2b59778/64e32130bfc19b04ac6fb43adc6e3604.bam	cef09e83-48ef-4eaa-ab7a-3faff3f3a647/9a5a53e214268ebe2d0b62cba0ebc16d.bam	7636641	31	0	2631	841
PD13478a	BS	194391	46	0.0002	A/T;32|CA/TG;8|AC/GT;5|AT;1	A/T;0.6957|CA/TG;0.1739|AC/GT;0.1087|AT;0.0217	1945ba35-ee8c-459d-8c9f-03eb36929b93/1ae952a516d3a981c832cf95de9d4b20.bam	14ade525-3f44-4228-8bc7-cf0f11ab42e2/8c7f8f25dc4fd74123baa9a099742047.bam	7546563	50	1e-05	2786	688
PD13479a	BS	194763	18	0.0001	A/T;18	A/T;1	55c7e0d4-0ac9-45a8-bbf7-85c6341820e9/d3cbbd1ed1ac03389e559b51f02927cc.bam	08984d6b-3278-49b1-97fa-185454aa5bd1/d49530e603ffa85a902fa3a0a6086a0b.bam	7559968	37	0	4082	647
PD13480a	BS	180592	41	0.0002	A/T;28|AC/GT;6|CA/TG;6|AG/CT;1	A/T;0.6829|AC/GT;0.1463|CA/TG;0.1463|AG/CT;0.0244	f909de3f-7b65-42df-8b64-33074692e370/cb08d0e5dcd33e91f05a9691d8200992.bam	abd7dc71-fa7e-4973-8767-46c92cbc390e/adb67999ca1fe33525afde4b1a7258a0.bam	7098867	46	1e-05	1730	817
PD13481a	BS	192717	34	0.0002	A/T;23|CA/TG;4|AC/GT;3|AT;1|GA/TC;1|C/G;1|AG/CT;1	A/T;0.6765|CA/TG;0.1176|AC/GT;0.0882|AT;0.0294|GA/TC;0.0294|C/G;0.0294|AG/CT;0.0294	180082a8-531b-418b-a3ce-fefecae9f6ff/482e5e8b8ac5f1f70396b829085939e7.bam	74c74482-0ddf-40fe-b677-b6e74e549e3c/3cd898848e6bccd676972d536ce4159e.bam	7487854	37	0	1934	725
PD13482a	BS	195351	37	0.0002	A/T;26|AC/GT;6|CA/TG;3|AT;1|TA;1	A/T;0.7027|AC/GT;0.1622|CA/TG;0.0811|AT;0.027|TA;0.027	3336f323-386f-49e7-9f19-f2a4dd65b381/fea703adbfc25a5356f5f0c629961ff9.bam	0376929e-5d04-4ce8-bf91-aa9494087afc/5e2f2386cc571c0182953f9fee5f5ede.bam	7552551	42	1e-05	1452	645
PD13483a	BS	195231	67	0.0003	A/T;67	A/T;1	6691369c-7595-4b41-8fc7-22c8e199fb31/5b21f1f2603e762a16d25d559d74d0de.bam	c1da556f-5a64-4d9e-9fdb-85351964d528/3973f1cd4a27a1629f218e0ad5961667.bam	7481915	112	1e-05	8309	963
PD13484a	BS	197836	25	0.0001	A/T;15|CA/TG;5|AC/GT;4|AAG/CTT;1	A/T;0.6|CA/TG;0.2|AC/GT;0.16|AAG/CTT;0.04	58e6aeb2-d67e-48ca-8df6-0785f5ecba3d/33ed53a4af5db311d8a6d595df8ce1f9.bam	7c7bbff3-b454-4523-8fa4-e17d0fdcd481/12cb482b0ce20ad883c13ca3e26313b0.bam	7628968	33	0	4068	576
PD13485a	BS	193788	44	0.0002	A/T;31|AC/GT;8|AT;2|CA/TG;2|AG/CT;1	A/T;0.7045|AC/GT;0.1818|AT;0.0455|CA/TG;0.0455|AG/CT;0.0227	6d67c7a6-423f-4ce6-a9a6-1149cd1f7667/247838a10a1c7321ceff74883737507a.bam	c4edccee-dd6d-424f-b252-5385e3bf80fc/8b66971a2d1c72225eb386f7bde0bafe.bam	7533910	47	1e-05	11858	1041
PD13486a	BS	193427	54	0.0003	A/T;44|AC/GT;5|GATA/TATC;2|GA/TC;2|AT;1	A/T;0.8148|AC/GT;0.0926|GATA/TATC;0.037|GA/TC;0.037|AT;0.0185	b8a2c1a4-ed6a-4c0b-91da-1064e71e3b0b/21ee46fed0fdf8887d5c3f7131660fe9.bam	271a7ada-98aa-413c-a1f4-6381612c5ce2/8fcbefb5d7d9f42b5e55447424db60d6.bam	7503490	79	1e-05	9154	995
PD13487a	BS	187028	66	0.0004	A/T;51|AC/GT;8|CA/TG;3|AG/CT;2|AT;1|C/G;1	A/T;0.7727|AC/GT;0.1212|CA/TG;0.0455|AG/CT;0.0303|AT;0.0152|C/G;0.0152	3a49639b-7896-48a1-a674-2c42b3c568b1/ae4bebfbb355ef4996e9bffe254f1973.bam	22d1f447-c860-43e4-8612-11dc6644082a/eb633138157a29a01e1c2577b3263a0d.bam	7315015	88	1e-05	3571	965
PD13488a	BS	192380	67	0.0003	A/T;58|AC/GT;5|CA/TG;3|TA;1	A/T;0.8657|AC/GT;0.0746|CA/TG;0.0448|TA;0.0149	04335b26-01db-4c44-9b7d-e6fc6a090e4b/0004f66bfe7597b67af4ce5f990890de.bam	9fbc6b28-a2a0-4a1a-99db-1ead7eab738a/e3feb4a67c6a75f3b8acb9af61ddefcc.bam	7487084	94	1e-05	3299	804
PD13489a	BS	189361	35	0.0002	A/T;27|CA/TG;5|AC/GT;2|AT;1	A/T;0.7714|CA/TG;0.1429|AC/GT;0.0571|AT;0.0286	f1100be5-4c57-4a9c-b6ac-a69e3d385cba/054869f173d6b7f0e351db9fbffa2f43.bam	d0232013-aba1-4093-8276-8f74c47a351e/29d628431aaa83639e684b3481ba7b47.bam	7369234	60	1e-05	5223	996
PD13490a	BS	189233	90	0.0005	A/T;76|AC/GT;6|CA/TG;4|C/G;3|AT;1	A/T;0.8444|AC/GT;0.0667|CA/TG;0.0444|C/G;0.0333|AT;0.0111	6c732673-375b-4ab5-a1f7-a8b009ce1ade/8bd227324581c8abb36f2a83cb991146.bam	39323c15-4b06-48ce-b019-f5a961bfe93e/3592a3dfd8f87f0d03a17a2e2758e4ed.bam	7385108	123	2e-05	8286	1122
PD13491a	BS	190833	59	0.0003	A/T;47|CA/TG;5|AC/GT;4|AT;1|C/G;1|AG/CT;1	A/T;0.7966|CA/TG;0.0847|AC/GT;0.0678|AT;0.0169|C/G;0.0169|AG/CT;0.0169	5161b68b-e757-47df-80cf-79554430e5cb/459793d5b324900a2f9dd1ec079a368e.bam	0772aed3-4df7-403f-802a-808df2935cd1/c007f362d965b32174ec030825262714.bam	7425922	76	1e-05	4902	888
PD13492a	BS	178210	67	0.0004	A/T;56|AC/GT;6|CA/TG;4|TA;1	A/T;0.8358|AC/GT;0.0896|CA/TG;0.0597|TA;0.0149	f6787195-f8a4-4dac-b09e-ad10321a96cd/6ec712be863e8d0eefce4eaa68c32804.bam	443e04a8-fe2e-4077-bd0d-fcbb03bd14c9/33cf5d73187a6c0037412c234615c8b2.bam	7060162	92	1e-05	10360	1381
PD13493a	BS	195469	38	0.0002	A/T;27|AC/GT;4|CA/TG;4|AT;1|GA/TC;1|AAC/GTT;1	A/T;0.7105|AC/GT;0.1053|CA/TG;0.1053|AT;0.0263|GA/TC;0.0263|AAC/GTT;0.0263	b412646c-8039-4543-87b3-d944be0161d8/c4f2bce8119c08997e31056620007fe5.bam	9a442aa9-3cf4-405a-a7dd-dba6a0d92704/718db53891f8efef65f825d8c8756fff.bam	7573889	45	1e-05	5604	410
PD13494a	BS	192955	37	0.0002	A/T;24|AG/CT;4|AC/GT;3|CA/TG;3|ACAG/CTGT;1|AT;1|C/G;1	A/T;0.6486|AG/CT;0.1081|AC/GT;0.0811|CA/TG;0.0811|ACAG/CTGT;0.027|AT;0.027|C/G;0.027	7f83458a-bf29-40e9-b1c8-6cc24c5abf42/94dced3c46499e0d5bed39088ef025ec.bam	644b98b5-c699-4808-9a49-36da31ce8a5c/ef3344347e59a94378b7f67dd7d398dc.bam	7506874	46	1e-05	3473	883
PD13495a	BS	197918	31	0.0002	A/T;18|AC/GT;6|CA/TG;4|AT;1|GA/TC;1|TA;1	A/T;0.5806|AC/GT;0.1935|CA/TG;0.129|AT;0.0323|GA/TC;0.0323|TA;0.0323	d234a0e1-4336-4a4c-8e0f-18b21027c286/50654b0f20d65db1ed93a8934eeb5b7b.bam	f0153a82-d093-49dc-a22a-dcd9ef483a11/501552aae01a386209f78e62f2a291b0.bam	7634962	40	1e-05	2956	515
PD13496a	BS	194120	65	0.0003	A/T;54|AC/GT;5|CA/TG;2|AT;1|GA/TC;1|C/G;1|AG/CT;1	A/T;0.8308|AC/GT;0.0769|CA/TG;0.0308|AT;0.0154|GA/TC;0.0154|C/G;0.0154|AG/CT;0.0154	260731ef-b78e-42bd-8e1f-1d475aedc837/f0c2c1403e1034ef584358104f09973c.bam	7093c863-3ce6-4283-8b07-972c7e3ac11f/1a4c45ba2dd127f831bb11d39497b4cd.bam	7519730	85	1e-05	8270	769
PD18817a	BS	197347	8	0	A/T;6|AC/GT;1|GA/TC;1	A/T;0.75|AC/GT;0.125|GA/TC;0.125	3eaf0cee-4b75-4a99-819f-b4bfc40eeae9/ad4aeedc224c6be5e21e26c038a43df4.bam	9fb4230e-da35-4a4c-8482-61da2b7ea1f5/9f8f6f03df6d100c90a761164800a42c.bam	7619340	27	0	3081	347
PD3989a	BR	197937	33	0.0002	A/T;30|AC/GT;1|AT;1|C/G;1	A/T;0.9091|AC/GT;0.0303|AT;0.0303|C/G;0.0303	52f85095-ba9b-4cd9-a64f-c34cd33b69e2/6372cfa467cd1e1298ca96ee02d27523.bam	efbede8e-f6a9-44a5-a9e9-a8e2b7330cb8/95ef20e701769cce3ae329e54544c7c8.bam	7638043	52	1e-05	4745	598
PD4069a	BR	197268	53	0.0003	A/T;49|C/G;2|AT;1|CA/TG;1	A/T;0.9245|C/G;0.0377|AT;0.0189|CA/TG;0.0189	317957ac-e739-4da6-a36f-89aab53ec8c6/ff9816177c1072f4a8bd486d20c9bbae.bam	52bbca28-6c1f-471c-9b42-a05b13db64f6/8c07e92da897cf40d1773e9e12685182.bam	7603646	80	1e-05	3178	689
PD4072a	BR	197106	11	0.0001	A/T;11	A/T;1	5aba9f36-0ccc-49bc-bfb3-0ed9f3b2d437/35a2abf93646d3984633f23f7c3c061d.bam	d7781b6c-45be-404e-9332-9100ec94ef3f/6e1fca03e50493939c64452cbe9143d7.bam	7581566	22	0	59914	465
PD4080a	BR	197807	4	0	A/T;4	A/T;1	6efda910-cc8a-4b52-9825-d128fa4db2f1/dd2d051fcbd7b8d5c17f653dba734b9c.bam	47feafdf-56ee-414f-824f-1da941953bf1/8f021d5e6e9783e23c096b9fcf070d6f.bam	7606280	6	0	3843	487
PD4224a	BR	184998	14	0.0001	A/T;12|CA/TG;1|C/G;1	A/T;0.8571|CA/TG;0.0714|C/G;0.0714	f268b166-ca61-4547-ba16-795d3bcd5507/36499e9b123c010f8a631a9366d685e3.bam	5215064e-16eb-4275-8d1f-298118cdaf27/ac135405085f44f6957fd783bca373a3.bam	7183665	33	0	9735	555
PD4225a	BR	197576	38	0.0002	A/T;36|C/G;2	A/T;0.9474|C/G;0.0526	42e051be-bee6-40dc-8dc9-a7d66022c2bb/eb15fa15c2e7687ae8fbc1eb734c6c98.bam	a4a93d2c-2d88-4b6f-b341-5056845e3dd1/1b2bb50c1a08d6958593172b67d4a01a.bam	7615046	58	1e-05	3389	859
PD4266a	BR	198462	15	0.0001	A/T;15	A/T;1	df3e5838-6b0f-49f5-8fb5-cfa2ae8c8154/72974903d64f4205d516d9b6486ded22.bam	03f25a55-70dd-4e25-8e80-b0d2a98f10e7/dafe1ba5cc8c9d0b59ba4d24eafe142a.bam	7644065	24	0	5707	944
PD4267a	BR	198496	18	0.0001	A/T;16|C/G;2	A/T;0.8889|C/G;0.1111	33b747bc-9e11-4cc7-ac6d-c4d4d548ee41/d8bdae97274e1eff0d875a626c091a37.bam	0edf217f-cfd0-4f24-aeb8-b43c152fad15/451549329670aa5c903f71488cbb029f.bam	7647104	29	0	3637	579
PD4315a	BR	198223	40	0.0002	A/T;37|C/G;2|AATGG/CCATT;1	A/T;0.925|C/G;0.05|AATGG/CCATT;0.025	01b8baf1-9926-4118-9f4c-c2986bbfe561/ce4d5dcb435b0b3d641a422f82e145ce.bam	42a74437-09c7-4aea-8455-4cc8b407c5b1/0f87bf73bbfc57ae5512aeb0360fcb2b.bam	7637426	64	1e-05	5718	947
PD4604a	BR	198183	32	0.0002	A/T;28|C/G;4	A/T;0.875|C/G;0.125	87907428-a714-4de1-8479-ffd1e6da6a7e/46333afe4198d17ae2d1087f9bd9de3a.bam	47303498-cb6a-4cf3-b9d9-2826929cd05a/0f0bfdf8d64c44b955129ab1e8a9a046.bam	7634290	55	1e-05	12901	1451
PD4605a	BR	196367	46	0.0002	A/T;45|TA;1	A/T;0.9783|TA;0.0217	74dc6ae8-50f3-444d-88ed-b91b2e68b05c/25df56acc40dfa57e33f826c3bd8197e.bam	e798256d-d385-472a-8ae4-7096189a460e/75e5ab0697eec300150de8ff1f549336.bam	7587336	69	1e-05	3995	876
PD4606a	BR	197362	12	0.0001	A/T;9|C/G;2|TA;1	A/T;0.75|C/G;0.1667|TA;0.0833	655cb0a4-a03e-4ad8-a79a-5850f79e273c/fee02d75c8d6fcb08acdf27c9bd7cdee.bam	45e52be8-a9ab-4789-af84-83e0285cfa67/df251763cd8276f7b379425ebb55d8c7.bam	7592856	18	0	2421	327
PD4607a	BR	198373	21	0.0001	A/T;18|AC/GT;1|C/G;1|TA;1	A/T;0.8571|AC/GT;0.0476|C/G;0.0476|TA;0.0476	b29306c7-5d8d-4b14-aa07-05f787f3353b/4fd7f1f5987b2aa5ba6caef1540aa121.bam	e938c25c-4398-43c0-aba5-76938135cbaa/08c90bc547856d0718b6dbf50ace69d7.bam	7640962	44	1e-05	39772	729
PD4608a	BR	198084	17	0.0001	A/T;11|C/G;3|CA/TG;2|AC/GT;1	A/T;0.6471|C/G;0.1765|CA/TG;0.1176|AC/GT;0.0588	ed8fb229-e4bd-42bd-a078-841964308845/b365e6923149d69b9f46a0ed2a7d434d.bam	0570d14a-051f-47c3-b13e-1b481c6f9a30/601ac1f77b9ef56fb8f9fefed549fff3.bam	7629473	31	0	3714	627
PD4613a	BR	197815	23	0.0001	A/T;22|AC/GT;1	A/T;0.9565|AC/GT;0.0435	1efbd447-1910-4032-a088-c3b6ba0d6122/ea9c99442afb2b2f23b3cb1ed2da419f.bam	bf48d336-a0aa-4928-a111-9eebcabaae07/8b7d25d765aa9121f99e06e33c11d302.bam	7615677	45	1e-05	3211	706
PD4953a	BR	197749	22	0.0001	A/T;22	A/T;1	318abc37-e90a-4c23-889f-8eacf6fdc9ed/7e6ccc67de0b0b14531794504b51afb1.bam	4b844d64-4d2b-4154-b7b4-2d5ce04db625/e7b29013c21f5172f093d7d25f3ea7ad.bam	7617990	72	1e-05	9305	1446
PD4954a	BR	197973	19	0.0001	A/T;19	A/T;1	f433970b-10bf-49ef-a2f4-d3747a6c0f2f/8bbda3241ff088d94a1903cb999827f2.bam	f551cde7-800c-446f-92b9-5325b6fe4ce3/2cadde6a8f80e326701ff958a70f6d1c.bam	7629510	36	0	7306	1297
PD4959a	BR	197109	36	0.0002	A/T;32|C/G;3|AC/GT;1	A/T;0.8889|C/G;0.0833|AC/GT;0.0278	aead845d-6992-4df1-9531-7443f73e2a82/d50b356f8406c757ee1a97b11312b817.bam	e215832d-9e24-4934-b639-713b24c8fea9/9acfb08c765d442ab403eff4e7be5955.bam	7603269	77	1e-05	6012	1126
PD4962a	BR	198567	18	0.0001	A/T;18	A/T;1	745357a7-d39a-4ba7-a146-f0cb91166ce0/190bf230ed6b1eff247a9a19297861f8.bam	47038e74-8a6b-4e46-858a-6cfd55e93329/a0d3ba4606beb9d06f445cae2196ceb6.bam	7649833	33	0	10522	315
PD4963a	BR	197834	15	0.0001	A/T;14|C/G;1	A/T;0.9333|C/G;0.0667	041b9bd3-b6ab-431e-aef1-78ab48b6c6a9/0f1918376baeccdc6bf47725566ae8ec.bam	7d0bf92e-a40a-4c8a-8a43-46028d57cf21/860e68a6860b393896cf0ae13075e339.bam	7623453	26	0	3043	529
PD4965a	BR	198133	20	0.0001	A/T;16|TA;2|C/G;1|AATGG/CCATT;1	A/T;0.8|TA;0.1|C/G;0.05|AATGG/CCATT;0.05	0b682636-5106-4089-8348-74478be359be/34f1ee5a6608cf17d16eac752c4e2978.bam	f989b02c-cd3e-4199-acf1-6e4f6db30425/cb32ab778eb9565d20ebc07a1fe1e0be.bam	7631852	37	0	4393	506
PD4967a	BR	198350	10	0.0001	A/T;10	A/T;1	b16b1f2d-adb3-48fa-acca-814658331056/b68e528fca84d4b31b044e103f544bc1.bam	f566a2d4-be4f-40d0-bb8d-9632c78a6e64/69b692e259a274a4c5668d8a37e567d4.bam	7634744	17	0	5700	607
PD4968a	BR	196574	72	0.0004	A/T;68|C/G;2|AT;1|GAAA/TTTC;1	A/T;0.9444|C/G;0.0278|AT;0.0139|GAAA/TTTC;0.0139	fa9b1133-f145-43c6-a8b4-96be14e735a1/e4f18e9492442ad684ea0faece0d528c.bam	85929c47-247d-4ed5-9835-b1d0f2ab61e5/392dadae71b447bd51bfd692fe35724f.bam	7587109	116	2e-05	7578	1048
PD4970a	BR	197808	18	0.0001	A/T;18	A/T;1	032dc384-a7e3-48b9-bb30-67f6f586c3e6/942772fb5e75a3cf18ce9a1f6b6039dd.bam	e60f38a6-0ada-4582-8b29-8498bbc8e709/6ff9e3385587d8c1c7d90c4fd1bce33b.bam	7606116	33	0	3918	649
PD4971a	BR	194209	25	0.0001	A/T;22|C/G;2|AG/CT;1	A/T;0.88|C/G;0.08|AG/CT;0.04	b27d8d3a-bf55-443d-97c7-a47f0b3f76ea/d03b8b2f7505cd583a8122594d6692ee.bam	24d0ebc6-56fc-44f7-beb7-f04f4137b859/e78993c3a33d0ffa0962406a92c3b33b.bam	7509716	36	0	4337	525
PD4976a	BR	195583	142	0.0007	A/T;139|C/G;2|AC/GT;1	A/T;0.9789|C/G;0.0141|AC/GT;0.007	4786c989-61bd-4b57-ace4-78c33ab8649c/4574a10d2c54f48ba4ea2b1943d18640.bam	74ef1ceb-34e4-4c65-a7a3-d06d1303a6e5/4ad77a16f1e57940eb4661b925e942ca.bam	7552283	212	3e-05	9457	1299
PD4981a	BR	198321	28	0.0001	A/T;23|ATG/CAT;1|AC/GT;1|CA/TG;1|GA/TC;1|C/G;1	A/T;0.8214|ATG/CAT;0.0357|AC/GT;0.0357|CA/TG;0.0357|GA/TC;0.0357|C/G;0.0357	5f48118d-72f9-4aee-b030-71080085ed49/8de9603fa4f3bbd707e79c5365f17683.bam	72346200-e6e5-4511-8f85-35cc7b5f9808/f24ab63f613645a02fc4b022e96285b9.bam	7635782	43	1e-05	2996	722
PD4982a	BR	197841	35	0.0002	A/T;32|CA/TG;2|C/G;1	A/T;0.9143|CA/TG;0.0571|C/G;0.0286	3b197303-1892-423d-815e-e19b241e80dc/41495b5561fb524ca929cdffb5d77d95.bam	efcf90ee-53ae-4f9f-b29a-e0a83ca70272/f5c9381090a53c54358feb2ba5b7a3d7.bam	7623452	56	1e-05	2533	677
PD4983a	BR	197947	19	0.0001	A/T;18|AC/GT;1	A/T;0.9474|AC/GT;0.0526	dd4b3b0e-c099-4bd6-8703-698e9ae75de6/159d08ad6aa64c9932a397702791dea0.bam	948cec5e-9ceb-453b-b0b1-34c3b9860db3/15e98f5745668996f7c608b2a8037616.bam	7626569	33	0	2836	513
PD4985a	BR	198164	16	0.0001	A/T;13|CA/TG;1|C/G;1|AG/CT;1	A/T;0.8125|CA/TG;0.0625|C/G;0.0625|AG/CT;0.0625	a3667f2c-7002-468a-b3bc-88ed95883fd2/0662486a572be505c9564e2ed50ddc94.bam	a982bbdd-a755-4fa4-b1e1-70f63c199735/f942c24e43418beb7aedf9d3400f439e.bam	7630941	30	0	3351	995
PD4986a	BR	195704	22	0.0001	A/T;21|C/G;1	A/T;0.9545|C/G;0.0455	0918909b-8b95-47d8-aee6-84d143c71d76/a9dc3fc69720c1f5191f2d0a78036431.bam	17aaf0aa-e6d1-489e-8dec-fba91749a684/a273b73d6599a8eef8f90908e737420f.bam	7559316	46	1e-05	3013	920
PD5928a	BR	196855	28	0.0001	A/T;28	A/T;1	2b09152d-7cd5-48ce-aa48-642f73c50f3b/47b4d5189043dc28d943a157b02f44f0.bam	20a236d6-23b1-471e-8a98-a079d3240c90/19b911355b841c93bed9fbdd7c9ed5c6.bam	7573739	65	1e-05	10066	1790
PD5936a	BR	189854	56	0.0003	A/T;52|C/G;2|AC/GT;1|CA/TG;1	A/T;0.9286|C/G;0.0357|AC/GT;0.0179|CA/TG;0.0179	aa610a96-eeff-47b8-933e-ec37521fcc18/1b2f1747e64a34472da2e08cf5b721e2.bam	4fe78b01-6bea-4bba-92cb-2ea7419ad085/e12a97afd05a50cc78fb97743db6a522.bam	7398594	91	1e-05	4965	815
PD5947a	BR	198387	20	0.0001	A/T;20	A/T;1	f3c8b0de-1ead-4a41-a728-a5f3bc214822/ff4956778e1b3967b073d65049dfcf49.bam	d3175f2a-cf2a-4919-9064-9ddb6ab5294f/c6b0dd73563bdac54c0be7bbb90ab803.bam	7637654	30	0	3381	421
PD5956a	BR	184945	35	0.0002	A/T;33|C/G;2	A/T;0.9429|C/G;0.0571	a3f03ee0-cef6-4a86-9f42-9eea9d39f87d/80a84d5b7bd63796ada4f3bcbc1ddd05.bam	492b6295-7749-4f9f-9aba-a33f28a72602/8a10957537ddf975ffffdef6fbe805e2.bam	7234778	73	1e-05	7657	1238
PD5961a	BR	194230	25	0.0001	A/T;22|AC/GT;1|AT;1|TA;1	A/T;0.88|AC/GT;0.04|AT;0.04|TA;0.04	f029d11d-a3ec-47bc-ab49-a4d8d72e7c52/02226b857f74317cd2cd8a389b186e0c.bam	e05c8626-722c-4331-b023-c0cf44376039/868a8f7a46ea621ff343ed1c0c0c6cf3.bam	7533583	41	1e-05	4803	734
PD6041a	BR	198274	25	0.0001	A/T;22|C/G;3	A/T;0.88|C/G;0.12	105adff2-7461-4e10-8b15-f9227ddd5cf0/00333230243c5b597674b629623fa831.bam	2d71556e-4140-4d6a-9aef-01e7e1c76724/423b15b512d70781b65de4085adae995.bam	7631592	45	1e-05	3077	548
PD6042a	BR	198466	10	0.0001	A/T;9|GA/TC;1	A/T;0.9|GA/TC;0.1	759d8057-f36c-49b4-8350-d45374541e2f/cf93f1b0544d205cc9079bd68a2c3e35.bam	a8100316-41b6-46ed-8552-8f3c9473fc8a/56cca90bdcc617f2f4df5d3bab56b432.bam	7640035	33	0	11110	935
PD6043a	BR	197361	44	0.0002	A/T;42|C/G;2	A/T;0.9545|C/G;0.0455	cac3b40e-4feb-4103-9ed1-9e882688e2bb/4f0f16f23eb9540ea66438d040540053.bam	10cb26bd-48a9-4048-906a-7dd878dca4fb/727185bb203cb1d0a2aa6059a6f00a65.bam	7539642	91	1e-05	28451	2392
PD6044a	BR	198504	22	0.0001	A/T;20|AC/GT;1|C/G;1	A/T;0.9091|AC/GT;0.0455|C/G;0.0455	1a84be48-b465-4bd5-8cf6-769c9ced212c/2fa3bf5c31213aa8a5c24497f0e7026e.bam	7f6e3ea3-e08a-4a42-8c8b-43e3ac3c8de9/bed760a07ef65925400f21dafd9c0f2e.bam	7646282	37	0	5643	789
PD6049a	BR	198230	50	0.0003	A/T;46|C/G;2|AC/GT;1|AATGG/CCATT;1	A/T;0.92|C/G;0.04|AC/GT;0.02|AATGG/CCATT;0.02	e440fc4b-24ef-4ddc-9c9b-53c05145092e/72fabcecabd4954fe9de28baf8e4be6d.bam	b5fdf322-d18d-4c0c-ba70-85c68b40dcd6/74a5c71078d87c1fb3272b24cb54977c.bam	7634644	82	1e-05	13109	1702
PD6417a	BR	191792	21	0.0001	A/T;18|C/G;2|CA/TG;1	A/T;0.8571|C/G;0.0952|CA/TG;0.0476	4043146d-80a8-4046-acd2-00e8a3e15533/1f51bc0abbba888a6aede0c5e86d00a7.bam	4c628934-e077-496c-a4f1-f5e9ed37f954/03f2ccd4cb3727c832ae49d3aa7fa692.bam	7439787	36	0	3403	440
PD6418a	BR	197047	34	0.0002	A/T;31|CA/TG;1|C/G;1|TA;1	A/T;0.9118|CA/TG;0.0294|C/G;0.0294|TA;0.0294	94a3f293-5e5d-4d9c-b34d-94a1b5f81e4e/cce7700af661cd1bfd87b0055c6a21d8.bam	d061e36d-03b0-401a-8259-c8b8ffca6eb0/8ab3c3cfcd5183c3f8872dec9087af13.bam	7606553	50	1e-05	4619	548
PD6422a	BR	194872	59	0.0003	A/T;55|C/G;3|CA/TG;1	A/T;0.9322|C/G;0.0508|CA/TG;0.0169	656eeecf-d440-4cab-a610-22f18a7d4663/62997b6d55a4c99aaee0b5ba583c716a.bam	359fd83a-8c5f-4f79-a800-8cddfa25e172/465c41279f86cde6606765655f9845a0.bam	7551520	114	2e-05	7538	747
PD6719a	BR	197433	8	0	A/T;5|C/G;2|CA/TG;1	A/T;0.625|C/G;0.25|CA/TG;0.125	bf0773ce-82db-4472-bf07-14f6b363bd3f/1dabc6f8a86e801f7f08b32e2075e398.bam	8176d601-021f-4150-9a87-cda1a794e6eb/6e75f04c104516af8d5759d4dcac8f76.bam	7613767	23	0	6236	256
PD6720a	BR	198235	49	0.0002	A/T;43|C/G;3|AC/GT;2|CA/TG;1	A/T;0.8776|C/G;0.0612|AC/GT;0.0408|CA/TG;0.0204	d3cd8549-f15c-4a74-8fed-08cdf80b958c/c363be71f4ecabaa7bf0a79c1bdac15c.bam	e9c2ce79-f7d9-4fe7-9d9a-b7606297432c/8685a0380f1e02b6d81165adbe57363e.bam	7639725	70	1e-05	3172	494
PD6721a	BR	198435	16	0.0001	A/T;15|TA;1	A/T;0.9375|TA;0.0625	eac1badd-dd50-49c9-8fc4-d6c764ba3089/2cc673e90c898b9c0b2d7a6d8ae11b2a.bam	a157d323-c961-44bd-9ceb-9e65e4f77584/63e504f8014c75c36be9bf162f5d001a.bam	7646157	32	0	3170	340
PD7199a	BR	194450	18	0.0001	A/T;14|C/G;2|AT;1|AC/GT;1	A/T;0.7778|C/G;0.1111|AT;0.0556|AC/GT;0.0556	d65b1aa9-da87-4aa2-a47c-c2663f13ba31/7ddbf968524f72e01c892968d742b362.bam	cb720066-1ac6-42b3-b177-c38a5d51a579/68fcfce3f452dfe01f8eb1c664da0917.bam	7542232	28	0	3133	520
PD7201a	BR	195314	13	0.0001	A/T;11|AC/GT;1|AAC/GTT;1	A/T;0.8462|AC/GT;0.0769|AAC/GTT;0.0769	c7f274d0-3a9a-4069-b5cd-4cdeb78455a1/752de9ecc05759f561ee32d27ba25835.bam	20a785ea-23cd-4083-99e6-e9694e847871/9d947cdef40c91b7bb2dca7b2197fc12.bam	7566498	21	0	3022	492
PD7206a	BR	166182	29	0.0002	A/T;27|C/G;1|GA/TC;1	A/T;0.931|C/G;0.0345|GA/TC;0.0345	681167bc-6605-4382-b902-5a2777ab7f11/4bc3e7a22136229927820e7cddd6d032.bam	a987ee51-b0f1-44c8-9133-afd9b9d4c746/1e2f6199bb1e0beefca68897726d6c75.bam	6707033	64	1e-05	7978	536
PD7207a	BR	161804	22	0.0001	A/T;22	A/T;1	04500079-bdf3-4adc-98cd-a5defb6772b9/c4373dd15532078ebd6a852d7adf19ef.bam	71e565ee-3962-476a-9f15-74b4b6c47fbb/3383f52d295210573edc2591c4f0f0b1.bam	6510498	39	1e-05	4331	637
PD7208a	BR	170393	10	0.0001	A/T;9|C/G;1	A/T;0.9|C/G;0.1	32afc9c8-0ede-420b-9580-3a33f3dec266/96fa698430e6f55e077c42388ea5f169.bam	063be993-6b13-496e-870a-a1eb069fa405/c065da5677879d13c497258b59c5e9cc.bam	6883040	16	0	6534	476
PD7209a	BR	198226	26	0.0001	A/T;25|C/G;1	A/T;0.9615|C/G;0.0385	193da36e-ed3d-4204-b550-befdecbcadef/dd38977a6768b372e2e1b0de36d7b8bc.bam	60f6b841-00ad-4e67-a590-9a1385b0e682/b0926c6a562bd3f22f2ffbc69beedc16.bam	7641944	43	1e-05	2821	532
PD7210a	BR	197662	22	0.0001	A/T;22	A/T;1	e59a8d97-330c-44ba-9e49-f266ca441b18/deb3f305973e40fe22e7bb0c0b279957.bam	b564babf-e981-4b58-a3e7-b1def7f31376/672f1a0b6f0e38b56abb4599af2fff23.bam	7626977	38	0	2246	538
PD7212a	BR	197969	13	0.0001	A/T;11|C/G;2	A/T;0.8462|C/G;0.1538	4c616ef4-c449-417b-874c-fa49bfbfcfcb/4f9028b9aa9665efccd56500fc9dba2e.bam	2a04ed05-86c4-4039-893e-3d8b319a4e3c/9ca68553fc9bc0a6d4fe77a7a1aa5eaf.bam	7633961	26	0	4419	609
PD7214a	BR	198545	14	0.0001	A/T;12|C/G;1|AG/CT;1	A/T;0.8571|C/G;0.0714|AG/CT;0.0714	f68a029a-b83d-4cfd-ae91-7e54c12ff104/ae9230e446c61e1b6ae388e81cd2fcad.bam	1cd50238-17c4-4130-8596-a60287c03ff5/e0daa95d9782909fd4805f519c4164c4.bam	7649453	19	0	2613	270
PD7215a	BR	198238	22	0.0001	A/T;19|C/G;3	A/T;0.8636|C/G;0.1364	3b4e523c-8c65-4897-b1d8-acebd1008b94/1f6cdd41691cf38d5d3892b6fffd6b55.bam	22d48590-67f3-4d4b-a66f-711798c88383/2fb4308ca855919546e433830a70a9ed.bam	7642573	37	0	7956	611
PD7216a	BR	198281	6	0	A/T;4|AAAAC/GTTTT;1|C/G;1	A/T;0.6667|AAAAC/GTTTT;0.1667|C/G;0.1667	c0e4a94b-d8f0-4a21-b8d4-5203583dfe2e/3ffb14ad03990b7c301c3401abd8d99b.bam	7d6854c8-7ed7-45dd-94ce-049751a7bb63/bbba59198fc5fe9035b9fb2e722554a6.bam	7640007	16	0	2556	563
PD7218a	BR	197692	32	0.0002	A/T;29|C/G;2|CA/TG;1	A/T;0.9063|C/G;0.0625|CA/TG;0.0313	46589ab6-bd15-4883-b017-9f969e38aec4/6244dcb7d1e46205c2d278f2c86185c1.bam	f1f06462-7fbe-40cf-8584-7f6bb25dd675/d69544a962843a0010099bc068ab1bcb.bam	7625441	47	1e-05	2629	471
PD7219a	BR	197035	20	0.0001	A/T;15|C/G;3|AC/GT;1|CA/TG;1	A/T;0.75|C/G;0.15|AC/GT;0.05|CA/TG;0.05	ce5eacae-c719-4542-9bf5-25ec5f6ce7f5/59ffad6f94e85aa9154dc5530f6bdc20.bam	eaa887d4-6087-4a7e-88e4-37653300b499/c63c0880556f09e781c8b365e94dea3a.bam	7607514	28	0	15105	581
PD7221a	BR	190427	16	0.0001	A/T;14|AC/GT;1|C/G;1	A/T;0.875|AC/GT;0.0625|C/G;0.0625	bb1a966a-2986-4514-9403-90af8cfbfb27/639858b7c435a556d6baf3d1d22e369a.bam	8e43b39a-9990-49d7-8534-fbde556f9418/9a707571fb1613fba23386a854ce4f8e.bam	7394894	27	0	2944	329
PD7433a	BR	197363	34	0.0002	A/T;31|C/G;2|CA/TG;1	A/T;0.9118|C/G;0.0588|CA/TG;0.0294	a2e2bebe-7419-47f5-b1d4-befde7c41e8d/e4b398553027dc84ba05cbb2c418787f.bam	63ac60e9-3cc4-4243-8ff5-bf96275cf064/c5f40b0464d5d5cf04629dee61c02662.bam	7612708	54	1e-05	4466	589
PD8618a	BR	185415	26	0.0001	A/T;24|C/G;2	A/T;0.9231|C/G;0.0769	63a47e41-4ab1-4e5c-a267-83afadf29919/00db6dca2dd605d2f1c8bc4c9bf45d1c.bam	48864056-3eb5-4eb8-af62-7a69687fe612/4b10addb14e2f1431a8b1ed4ec160c60.bam	7296826	35	0	3537	577
PD8622a	BR	198195	22	0.0001	A/T;22	A/T;1	e9372326-21f3-4d38-a70b-da80b42e298b/ff5321f8588106f8fc14735b66ba005d.bam	3561a0a7-8ba0-4c37-8868-2c15ef495ff9/7c0080375414f18c4d39f0eaa7fa454f.bam	7641869	39	1e-05	3612	919
PD8623a	BR	195417	14	0.0001	A/T;13|TA;1	A/T;0.9286|TA;0.0714	d3940b3e-8aee-49bb-bc4b-1c2f2a4def1c/f0e3e921b1af35bcbb81055ccce4aa51.bam	4482248a-94fe-468e-b66a-3a8aca5c8bf2/d844dde2261fa9718763bad6f14a08bb.bam	7577366	39	1e-05	4912	951
PD9000a	BR	193687	40	0.0002	A/T;38|C/G;2	A/T;0.95|C/G;0.05	7a979e5f-6908-4413-9374-6cd5b48a7afc/962563a8ac90079983039ff82798c2c2.bam	932325c1-e53d-4712-aa76-1b6198a611a8/39a6cd29b3215c01ee73b9ae4b9f968f.bam	7518390	89	1e-05	12492	1694
PD9001a	BR	195322	41	0.0002	A/T;38|AC/GT;1|CA/TG;1|AG/CT;1	A/T;0.9268|AC/GT;0.0244|CA/TG;0.0244|AG/CT;0.0244	10f40913-d59c-4bc4-84d2-ed1a61c0daa6/f5d20700ccb412aece405e3f903a941d.bam	b9d3bccb-fd6a-451e-b8e4-c5fa730a84f0/4e477976c92568614918611b0919592c.bam	7573021	71	1e-05	4966	880
PD9002a	BR	191110	251	0.0013	A/T;235|C/G;7|AC/GT;5|AT;1|CA/TG;1|GA/TC;1|AG/CT;1	A/T;0.9363|C/G;0.0279|AC/GT;0.0199|AT;0.004|CA/TG;0.004|GA/TC;0.004|AG/CT;0.004	873fb184-f963-4f24-82ef-fa0b137c6acb/afc0f7d5e0113b1c633d5f0dddf403e6.bam	10be41ab-18ca-4c24-8250-86bec436297c/338cc03eada42718af9d5ca5e5169ec0.bam	7447244	348	5e-05	12955	2090
PD9567a	BR	197860	24	0.0001	A/T;22|AC/GT;1|C/G;1	A/T;0.9167|AC/GT;0.0417|C/G;0.0417	02be2b97-1897-463b-84f3-d7bcf3f184ae/d4a1ff158eea86c343aee8cc14f46a5f.bam	b6a37fb7-bb3b-4c8c-94d1-53a0bcdbf20c/10f92bc54f041e45e71c9894e8830cfe.bam	7635597	43	1e-05	6435	531
PD9569a	BR	198372	17	0.0001	A/T;16|C/G;1	A/T;0.9412|C/G;0.0588	2db8bb78-d12e-460f-ac25-ba998c2a0b38/c24d16491a5f62490b9a14add33e8801.bam	b970c443-5d34-4cab-a35a-12449f97a10d/4b76db53038f484c17e5f5183ece91ae.bam	7645462	30	0	4446	567
PD9570a	BR	198416	18	0.0001	A/T;17|C/G;1	A/T;0.9444|C/G;0.0556	d529813c-001f-48de-915e-4621c5747a0f/1591269c8015dd7558031f70c917793f.bam	1483a2f6-e194-4dc9-b21b-cc43fde1df2f/77b817877bee951efa52cbeb18902545.bam	7646808	23	0	3531	332
PD9572a	BR	198290	13	0.0001	A/T;13	A/T;1	90aea36e-dc63-455d-b4a3-1daccee3b134/2bd0a0ccfcdc047b68fe55a6ab8e5737.bam	b8a4487d-d8ae-4c51-a26d-f32e421b130d/fdadbda39a455f9b9e1685c39d84660d.bam	7642786	20	0	6036	431
PD9573a	BR	198042	28	0.0001	A/T;22|C/G;3|CA/TG;2|GA/TC;1	A/T;0.7857|C/G;0.1071|CA/TG;0.0714|GA/TC;0.0357	0e50ff92-ec3a-4c59-91da-eddd704bc2da/874346f5d9625335b940414e971c4642.bam	5999d974-c4c6-4913-9933-23b9220c11ec/e5128f75536aedece012397e1b0a299f.bam	7638709	45	1e-05	3901	586
PD9574a	BR	195935	18	0.0001	A/T;16|AC/GT;1|C/G;1	A/T;0.8889|AC/GT;0.0556|C/G;0.0556	3b0d47c0-11bd-49b2-9bb5-9d6591145184/72e1f4085ea25351bdd25b3066d44c43.bam	e26ed789-3b01-4665-a99b-8d6a9b6bc41a/4eeba0a09027ccff5003cc4e22ee224e.bam	7590875	28	0	2665	433
PD9577a	BR	198575	7	0	A/T;7	A/T;1	2af8189f-fd8d-4ac1-b036-8702a40784e6/ee5ebb87e3b99c9fa4b4a44853a61268.bam	a52e655d-bf71-48e6-b1ef-c5327e6e88f1/21eefe2e8de8a6857fa95703505712a5.bam	7649998	13	0	5632	838
PD9582a	BR	198402	9	0	A/T;7|AC/GT;1|CA/TG;1	A/T;0.7778|AC/GT;0.1111|CA/TG;0.1111	7887f116-2ec5-4c40-b466-d986bdfb32fe/d97f6432e95baededa27746b4fccde11.bam	394f8b99-1960-4626-bf1e-762a98341888/754df569ac232b01fd590d851c0c3a23.bam	7645503	19	0	5161	459
PD9589a	BR	193683	8	0	A/T;7|AG/CT;1	A/T;0.875|AG/CT;0.125	6619d650-dba5-4a4a-a729-4a4f8f74c4a7/2b32eef776a46492513db8331796e396.bam	49f67f99-19b3-4d57-8a54-1d4700984940/dc586ba727711659c589d5c0e245f40e.bam	7548362	19	0	3805	623
PD9599a	BR	192280	59	0.0003	A/T;47|AC/GT;4|CA/TG;2|C/G;2|AT;1|GA/TC;1|TA;1|AG/CT;1	A/T;0.7966|AC/GT;0.0678|CA/TG;0.0339|C/G;0.0339|AT;0.0169|GA/TC;0.0169|TA;0.0169|AG/CT;0.0169	d4ba03a5-17a0-4a15-991f-50a45ad26ff6/c08ad2b2fbc311cfcab0aeadbdf3946b.bam	3f48b5f4-776d-4c30-b84e-87bbbe86ea2e/83f765504ca65610220698f70dce73ad.bam	7464982	92	1e-05	7581	1423
PD9605a	BR	186195	71	0.0004	A/T;56|CA/TG;6|AC/GT;4|AT;2|AAG/CTT;1|C/G;1|TA;1	A/T;0.7887|CA/TG;0.0845|AC/GT;0.0563|AT;0.0282|AAG/CTT;0.0141|C/G;0.0141|TA;0.0141	bbd8e28d-d712-4401-a32d-5e21f0775663/402f54dff10529591bb750da0b95bb69.bam	b9c320f5-ff78-4ece-b6dc-fa8a4a9f0091/18f53542d4bbd85d5b199b05c5336623.bam	7292998	94	1e-05	6320	1618
PD3890a	BR	175908	25	0.0001	A/T;19|CA/TG;2|C/G;2|AT;1|AC/GT;1	A/T;0.76|CA/TG;0.08|C/G;0.08|AT;0.04|AC/GT;0.04	e10a633e-7181-4211-9f59-b35fb20ce7ca/83f31e082cc17e5b14cf8b07afdc89ca.bam	318b0217-5d3d-496d-b8ef-9d3b29bf2880/2b845b723d691204a14e5bddc2d73e55.bam	7081680	46	1e-05	8183	885
PD3904a	BR	189556	29	0.0002	A/T;22|AC/GT;2|C/G;2|AT;1|CA/TG;1|AG/CT;1	A/T;0.7586|AC/GT;0.069|C/G;0.069|AT;0.0345|CA/TG;0.0345|AG/CT;0.0345	ecb855eb-3369-4bf3-b096-b18ab652fc47/e19b256847e1bf578a05608ad2e4ef64.bam	03e305fa-64ec-45cb-96de-94b0e2b30ddf/d71f32b81cdc2b244002beedfe8af310.bam	7373873	66	1e-05	8755	1825
PD3905a	BR	171481	24	0.0001	A/T;19|CA/TG;2|C/G;2|AC/GT;1	A/T;0.7917|CA/TG;0.0833|C/G;0.0833|AC/GT;0.0417	373900e7-91d4-44f1-a237-43ee4897dd8c/9b853d15dfbfe1b9f3eaad9b039107e4.bam	1677b4e7-a66f-4815-a120-1df11c3308d8/47fb91c726f5d03bfdf1b387ccce8aaf.bam	6847122	41	1e-05	10199	981
PD3945a	BR	170349	57	0.0003	A/T;56|AT;1	A/T;0.9825|AT;0.0175	57f0267b-606f-438e-9917-66549299ae4e/cd68ee9c75a886ddf4baa9ee504089fc.bam	5b64c1d0-1642-48d8-ab4f-dc0599bac6dd/99d91eaa92214a3809350b7acad4aaf2.bam	6618792	115	2e-05	14964	2029
PD4005a	BR	194228	19	0.0001	A/T;18|TA;1	A/T;0.9474|TA;0.0526	7b4265ba-d604-4081-973f-81ee87495e06/228a53b73d2c63eb66530b172cb65b41.bam	85b36881-9cb8-4487-a5bd-dc4f07f3e516/b6ee98f353017df7d1354ae22fc9e3dc.bam	7510179	38	1e-05	8064	676
PD4006a	BR	157017	19	0.0001	A/T;16|C/G;2|AC/GT;1	A/T;0.8421|C/G;0.1053|AC/GT;0.0526	f1daba3e-ca92-4313-a8fd-60c61f65923d/9fb058ca5dc7ad08c86a3158a39a65ff.bam	92c0d198-cf69-466b-8459-71a1b24785fb/48df04ff1d77c273e472effcabf70ec7.bam	6221447	52	1e-05	20107	1163
PD4085a	BR	177294	19	0.0001	A/T;19	A/T;1	3f0ada53-6215-4f70-bcb6-c1b564cc657c/04b444338ca9115da592c7533028ee03.bam	bcb66cf5-7fe5-4736-85da-d2f28bd62dfc/fbea9273f92db57593383df21f483cff.bam	6891138	32	0	4982	621
PD4086a	BR	194999	12	0.0001	A/T;11|C/G;1	A/T;0.9167|C/G;0.0833	1a125701-a625-464e-a3bf-046438d46c70/616481944c74066664e0ef8189f371eb.bam	d322582f-8fea-42ea-9778-2886dc89b918/92706898d41bca1d4cd94fa8499e829d.bam	7478201	23	0	3277	342
PD4088a	BR	190231	29	0.0002	A/T;25|CA/TG;1|GA/TC;1|C/G;1|AG/CT;1	A/T;0.8621|CA/TG;0.0345|GA/TC;0.0345|C/G;0.0345|AG/CT;0.0345	142dad63-1f3c-4125-9dd5-32f5d28862b8/6908c9336a4de80f5f16af39da29b1e4.bam	3121b375-100a-482b-80fc-1661fd4968e1/a39aed571f52193a6f25edfeee924929.bam	7282803	49	1e-05	3371	345
PD4103a	BR	197642	49	0.0002	A/T;49	A/T;1	835b4912-d1e1-4719-969d-c516f196981e/2091598e1b73ad759444a9a05a662cdc.bam	d42119c2-cf97-46c7-8e02-79ba36ff1779/5168c0f1e53ae29a91f8dfb5108daca2.bam	7608988	85	1e-05	7210	610
PD4107a	BR	196402	42	0.0002	A/T;39|CA/TG;2|C/G;1	A/T;0.9286|CA/TG;0.0476|C/G;0.0238	7a66726d-39a8-46eb-9ebb-23eec6a7ac67/ae57bc369df888047340433c48ebf199.bam	1b1cc026-6783-461b-be67-481d648880c7/fb21dbec380434180ded9a1820c48330.bam	7555403	71	1e-05	12746	890
PD4109a	BR	196630	175	0.0009	A/T;168|C/G;3|CA/TG;2|AT;1|TA;1	A/T;0.96|C/G;0.0171|CA/TG;0.0114|AT;0.0057|TA;0.0057	b88dc76c-4322-42a9-b8b6-8fa33730b264/7f10f832beece369b665bb530f972965.bam	1a6f3118-3878-4b61-8f5e-42df61433cb3/8730a4615612249f4e15b1543b19095e.bam	7574560	268	4e-05	13038	1190
PD4115a	BR	186399	29	0.0002	A/T;28|CA/TG;1	A/T;0.9655|CA/TG;0.0345	6f560ceb-265b-4b33-a58b-48dc6f8b7169/fa53a1862ab9edf2d889c6c4fa239479.bam	b0693623-9626-4028-b9d2-2ef537bcd793/ea40b5df5d9dcf15afd455997b8ec157.bam	7196546	85	1e-05	12176	1631
PD4116a	BR	167273	39	0.0002	A/T;36|AC/GT;1|C/G;1|AG/CT;1	A/T;0.9231|AC/GT;0.0256|C/G;0.0256|AG/CT;0.0256	1b9215ab-3634-4108-9db7-7e63139ef7e9/8f957ddae66343269cb9b854c02eee2f.bam	ef26d046-e88a-4f21-a232-16ccb43637f2/7723a85b59ebce340fe43fc1df504b35.bam	6598188	90	1e-05	11204	1408
PD4120a	BR	198521	20	0.0001	A/T;19|CA/TG;1	A/T;0.95|CA/TG;0.05	1abdd039-1c39-4593-b7ee-fd6c90e85fd6/17a31a3deafd6aa0e119d28c8ad27b3f.bam	b49ae15e-b5e2-47b1-aff6-34a5a84b78a6/88b3de0d9e2f87263a2063f1cf179ff0.bam	7649049	36	0	80163	3395
PD4198a	BR	191431	72	0.0004	A/T;66|C/G;3|AC/GT;2|GA/TC;1	A/T;0.9167|C/G;0.0417|AC/GT;0.0278|GA/TC;0.0139	f555b7dd-4aa1-4b1a-bf03-fc0c39d8141f/fb6b8d2696c394b4cae539763aaf28d2.bam	28f9d3ff-1d8f-4378-b2a2-3a98cf4900f3/ad7de49d82b86cbcb4a7e7abf27df1ce.bam	7423768	124	2e-05	7132	667
PD4248a	BR	195312	25	0.0001	A/T;22|C/G;2|CA/TG;1	A/T;0.88|C/G;0.08|CA/TG;0.04	ba68c9e4-bdb0-4506-b73d-0c3e5426f8aa/8f54ef773e0d385efea404f33f8d0335.bam	19a2784e-7ce0-4b49-958b-a00850db67f1/97259156cf28a2b1bb89afea72d4b55f.bam	7504512	48	1e-05	4249	839
PD4255a	BR	197860	75	0.0004	A/T;69|AC/GT;2|C/G;2|CA/TG;1|AG/CT;1	A/T;0.92|AC/GT;0.0267|C/G;0.0267|CA/TG;0.0133|AG/CT;0.0133	354292b7-7f1f-41c9-a1c5-9e9ddb701e28/3998954cb0a16eac5a28f0b825ba16a3.bam	d1c96c68-d96d-429c-a127-d9ae9788daff/47bbd2941d2f5f50094d2419a94a4f2c.bam	7617665	146	2e-05	6749	1090
PD4836a	BR	197994	75	0.0004	A/T;70|AC/GT;2|CA/TG;1|GA/TC;1|TA;1	A/T;0.9333|AC/GT;0.0267|CA/TG;0.0133|GA/TC;0.0133|TA;0.0133	0de7aa70-b764-4937-8154-266568277ab7/6a14cdd22dacb3527dd3664837577ff3.bam	a5353242-e49c-458c-9b02-60571e630848/5a6f7b5ed230cd6d0aa2b3bfea56cf7e.bam	7622619	109	1e-05	6868	984
PD4845a	BR	198466	76	0.0004	A/T;73|AC/GT;1|CA/TG;1|C/G;1	A/T;0.9605|AC/GT;0.0132|CA/TG;0.0132|C/G;0.0132	88f1fde4-24bb-4c1a-ad69-8848507d6d55/528628b7a4b981e51647fbc5b9ebb108.bam	f795e982-6b15-4888-a718-7a332bc6be66/45f14ecc7fbeecd5f0b200502403b2d8.bam	7644331	100	1e-05	8881	1048
PD4980a	BR	197089	88	0.0004	A/T;85|CA/TG;1|GA/TC;1|C/G;1	A/T;0.9659|CA/TG;0.0114|GA/TC;0.0114|C/G;0.0114	7bf04954-b929-4370-a9f2-cb17c50bff0d/e73e8a92a29a78e334430e920209ab5b.bam	10719123-7905-4fbb-b6d0-d33a89f2e826/54e3bac37058447a7b4666d4ec4afd07.bam	7597407	144	2e-05	5992	1113
PD5925a	BR	197687	13	0.0001	A/T;11|C/G;2	A/T;0.8462|C/G;0.1538	4acd08c6-1354-414d-8961-1f04acb2275c/1b60a51ec86ff776ebc257d132d58496.bam	fa462850-1f86-4a76-9973-09d88bf3a9d6/fc47284df17c4702f04cce252d505551.bam	7605825	42	1e-05	12353	1045
PD5942a	BR	195421	81	0.0004	A/T;80|AC/GT;1	A/T;0.9877|AC/GT;0.0123	a0f8eb55-9b9c-4f08-a90c-4735d741e9a1/23bbf606908877c6ed572c99aa7a2460.bam	6357b366-6a75-4186-910b-1d9a508b17b6/a9a185461a2af90dba56aa1a60decd7b.bam	7514201	120	2e-05	8642	1082
PD5944a	BR	191944	69	0.0004	A/T;67|GA/TC;1|C/G;1	A/T;0.971|GA/TC;0.0145|C/G;0.0145	666bb75e-c33d-4257-9fd0-ab5260030591/587655467d4ee2f5d115c68f04e14f33.bam	3c43cc68-b412-4a61-8ab0-ea3e88e60b15/e347618abe48a38da78f56dd358d1ec9.bam	7453491	100	1e-05	4370	814
PD5950a	BR	195905	24	0.0001	A/T;20|C/G;2|AT;1|TA;1	A/T;0.8333|C/G;0.0833|AT;0.0417|TA;0.0417	39061df1-d308-4b57-8175-e798bb21110d/b59613424dfecb7d67d87b96eca09d5f.bam	71332a36-1e30-41d0-9ffd-5670a3c5098b/4bcf4f050a418a10e324fae4392a7ebc.bam	7574452	40	1e-05	4408	594
PD6018a	BR	198281	27	0.0001	A/T;23|C/G;2|AC/GT;1|AT;1	A/T;0.8519|C/G;0.0741|AC/GT;0.037|AT;0.037	bcad1156-15cc-473d-a8bc-22f97382153d/966c9e57d9fcc4c4ed9cf102fe959d33.bam	f617b26d-618b-4d98-8197-cfd31fe23257/9a735f863cb004596fe80a8abde82223.bam	7633832	44	1e-05	4166	640
PD6046a	BR	198472	38	0.0002	A/T;38	A/T;1	f92a69b4-0be8-41f9-9fe2-4fd85fcd4ce5/6c1c9eac8759c05c3a33a8ab29f49533.bam	4b3a50b5-af07-4e82-afa8-54b5cb7e524c/12dda9058c61aa1f4c832661bf0058fe.bam	7647622	60	1e-05	4317	724
PD6047a	BR	191963	170	0.0009	A/T;165|CA/TG;2|C/G;2|AC/GT;1	A/T;0.9706|CA/TG;0.0118|C/G;0.0118|AC/GT;0.0059	8e44dd8d-d1e8-4c86-bee8-fee31984a276/298a7c366520e93ad1ed9de5a4288bd2.bam	759bbf39-a07c-454e-99d4-19543afff26c/498f8fbffe0b553724d9960824932a52.bam	7403124	277	4e-05	12638	2021
PD6409a	BR	198525	10	0.0001	A/T;7|AC/GT;1|C/G;1|AG/CT;1	A/T;0.7|AC/GT;0.1|C/G;0.1|AG/CT;0.1	ee99f2a5-3ed7-43ee-b145-5701ca55a8a2/b3e207b2752e0b2f2e9fd6878058cab9.bam	ecf5ff4d-f4ac-4a37-aaa0-c49030e37cf1/febc6e5fa113b0ed1025b4fea982b145.bam	7647965	21	0	12200	828
PD6411a	BR	198430	5	0	A/T;5	A/T;1	1a337099-2805-42e1-bb1c-54a7c3b8e1bb/17da6bacc1b0bb5e78d6ddac01b5afd3.bam	129498fe-517a-4058-b4ff-6fdc8fbe1761/15b95585cdc3b861b66f7240c41662c9.bam	7645994	13	0	9195	703
PD6415a	BR	195684	21	0.0001	A/T;20|CA/TG;1	A/T;0.9524|CA/TG;0.0476	a4b233cc-9b32-4571-97e2-c7879a91ea8a/31e52d5245825bf339f4ea525069ea57.bam	e35586a2-7b19-4ce2-8699-5371a3516374/b78c9fe7bf1aa96b21bc94aa72ba0d04.bam	7575464	51	1e-05	18850	1295
PD6722a	BR	198554	17	0.0001	A/T;16|AC/GT;1	A/T;0.9412|AC/GT;0.0588	4318b574-235a-4cdc-8692-21496c8d9636/02f09c901488d56acef72a53a2b40bb5.bam	3b1aa236-4ec6-472d-bad6-cdd4d0a10785/e826dfbd6080835afd1077a3a8f5ab71.bam	7649616	27	0	11881	599
PD7316a	BR	190718	9	0	A/T;8|TA;1	A/T;0.8889|TA;0.1111	cbc0a4b3-4ac8-4791-a8cc-3ce909d2ba3f/a8e08da635077bbb0cceffe16719d032.bam	b89bca6b-fc28-4239-a035-c0ef0dab06a0/b0c752b754546f71620b0701a6e054d2.bam	7433984	23	0	8219	660
PD7321a	BR	195315	26	0.0001	A/T;24|AT;1|AC/GT;1	A/T;0.9231|AT;0.0385|AC/GT;0.0385	855fa2b6-eedb-4f2a-9f63-f6fea1c6dc85/84384d4e4263ccc6e9a100f78adff314.bam	c6fe8064-b308-4d95-ba81-ac0bef3ca332/b02b9fc24633e471a80ab1d2e1434b10.bam	7568702	51	1e-05	9029	1377
PD8830a	BR	160218	105	0.0007	A/T;97|CA/TG;4|AC/GT;3|C/G;1	A/T;0.9238|CA/TG;0.0381|AC/GT;0.0286|C/G;0.0095	e2e85e5d-1ffc-4e77-903c-01a75d655ee0/1a8637d9cd1f22c48c3b6f686deaa3da.bam	75ca1088-1248-4a5e-a84c-268556a8e6e7/8eadcd3ffc7774f80fd39dc5820d920c.bam	6534123	142	2e-05	12150	1426
PD8964a	BR	168598	148	0.0009	A/T;138|CA/TG;5|AC/GT;2|C/G;2|GA/TC;1	A/T;0.9324|CA/TG;0.0338|AC/GT;0.0135|C/G;0.0135|GA/TC;0.0068	f807042c-1e66-44d8-9281-3cebd425f140/cade26a3fe30122082eb98cd22722b3d.bam	a9f0bd48-6bdc-48a4-b3ca-dd6006f138ad/0c9401e78fc7f2e4bd3414e5572eb9a3.bam	6794580	246	4e-05	15905	2802
PD8965a	BR	189177	104	0.0005	A/T;83|CA/TG;10|AC/GT;6|TA;2|AT;1|C/G;1|GA/TC;1	A/T;0.7981|CA/TG;0.0962|AC/GT;0.0577|TA;0.0192|AT;0.0096|C/G;0.0096|GA/TC;0.0096	daff8205-af74-4c63-bd95-6b4c0c0dfcce/16fad18e5b765125d634b21adbfaaa74.bam	98687658-5d16-42d7-b90f-20a4a8c2d53c/c8aa43b0b5950427706e966022e3ec00.bam	7400579	143	2e-05	7232	1751
PD9592a	BR	198219	16	0.0001	A/T;16	A/T;1	e0d3b03c-7c46-4e79-a9c3-6f863565effd/a1935c669321c25169389a1786ea376e.bam	721b3e46-c6f3-4a32-9af1-cded0a21cbe3/cb07f7195409403cba42b2276cb2ee27.bam	7643523	43	1e-05	13386	1077
PD11752a	BR	195243	112	0.0006	A/T;103|CA/TG;3|AC/GT;2|C/G;2|TA;2	A/T;0.9196|CA/TG;0.0268|AC/GT;0.0179|C/G;0.0179|TA;0.0179	3e7969a9-2ebe-4bb5-a38b-97cec8ba6b37/3c8b599f5c945689af31f4abc473d08d.bam	bb288c9e-9b11-4296-bc50-9c78ebc0b8ff/a9e072f9f291232ea8cc319241755ae9.bam	7562703	191	3e-05	11078	1424
PD13298a	BR	183359	105	0.0006	A/T;92|AC/GT;4|C/G;4|AT;2|CA/TG;2|TA;1	A/T;0.8762|AC/GT;0.0381|C/G;0.0381|AT;0.019|CA/TG;0.019|TA;0.0095	dcee9fd8-776c-4931-9b6c-2b50d2bdd674/e06588d9bca6003c0f0ec945f109b30a.bam	70cbb75b-5f6e-469d-ab90-2f1c15399387/1f33331db34476d411390e48dc3e949d.bam	7152842	168	2e-05	11661	1696
PD13622a	BR	197588	87	0.0004	A/T;81|AC/GT;2|CA/TG;1|GA/TC;1|C/G;1|AG/CT;1	A/T;0.931|AC/GT;0.023|CA/TG;0.0115|GA/TC;0.0115|C/G;0.0115|AG/CT;0.0115	25e9e9c7-e4d6-4b0b-b9c4-eae88e559a9f/abd52dc6c3c031318bdf855dc31e4f53.bam	f38795ee-eadb-42db-9242-44254d90cae3/eb5f6eee937da5537ce407964e3af9f5.bam	7623612	137	2e-05	7635	1070
a876398c-5b1d-444f-a360-5fe2db697480	BR	190046	47	0.0002	A/T;44|CA/TG;1|C/G;1|TA;1	A/T;0.9362|CA/TG;0.0213|C/G;0.0213|TA;0.0213	0fd19ef1-6ae9-43d8-88cc-8c81b97221cf/PCAWG.be4e193a-0c7e-4f1f-bb1d-db374264155d.bam	5e4bbb6b-66b2-4787-b8ce-70d17bc80ba8/PCAWG.4b7c5c51-36d4-45a4-ae4d-0e8154e4f0c6.bam	7416819	84	1e-05	29812	4047
f848b66f-bd9e-4fba-afd4-eb58848d1ef4	BR	191180	59	0.0003	A/T;46|CA/TG;5|AC/GT;4|AG/CT;2|AT;1|C/G;1	A/T;0.7797|CA/TG;0.0847|AC/GT;0.0678|AG/CT;0.0339|AT;0.0169|C/G;0.0169	7dc06c71-8af9-428e-b87e-b268aa2b9168/PCAWG.1f6de218-f294-4555-9a6c-04c6c4ed81ef.bam	b92ab845-7c4c-4498-88c2-75c2cb770b62/PCAWG.a3efd151-d3c6-49da-9692-f0436e849d87.bam	7475250	102	1e-05	12300	2533
e5593865-5f8e-4a4c-b36f-73fbe64d66da	BR	195354	44	0.0002	A/T;37|CA/TG;3|C/G;2|GA/TC;1|TA;1	A/T;0.8409|CA/TG;0.0682|C/G;0.0455|GA/TC;0.0227|TA;0.0227	62e9f559-0b03-4b88-aa47-d0492c4f6c30/PCAWG.22199b3d-c92b-4d22-a17c-665a358923c2.bam	14729af7-2c85-4122-b05f-4283ea5f4a6d/PCAWG.efb02c7f-55b1-42de-9b20-b1f6df91cf0b.bam	7588583	67	1e-05	6022	1200
1eb62abc-7928-405b-84cc-f091ca5347b2	BR	177755	76	0.0004	A/T;66|C/G;4|AC/GT;3|CA/TG;2|TA;1	A/T;0.8684|C/G;0.0526|AC/GT;0.0395|CA/TG;0.0263|TA;0.0132	88c45872-86a2-4cfa-8424-93030c4fdd4f/PCAWG.7ff82d5b-8ad1-4da2-b6bf-f1c746609638.bam	dc22f90b-bb26-45ac-8ec9-2a37f7e8e7e9/PCAWG.15c6fc97-de2a-472c-9f20-3bca01462f66.bam	7103261	129	2e-05	16990	1319
dabb5a94-9706-4429-8db0-c328e2004340	BR	196308	65	0.0003	A/T;52|C/G;4|CA/TG;3|AC/GT;2|AT;1|GA/TC;1|TA;1|AG/CT;1	A/T;0.8|C/G;0.0615|CA/TG;0.0462|AC/GT;0.0308|AT;0.0154|GA/TC;0.0154|TA;0.0154|AG/CT;0.0154	42649da3-0a01-4ffe-b27c-a368b55cc0f2/PCAWG.4544b1d3-bd47-4921-a049-7f4702b75f31.bam	d525a66a-2c5d-46c2-b0b8-6469e626fbcd/PCAWG.39ad557b-b9ca-4dc6-a3c7-eea8798e56e3.bam	7605024	103	1e-05	4344	1185
ec4d4cbc-d5d1-418d-a292-cad9576624fd	BR	191376	28	0.0001	A/T;19|CA/TG;4|AC/GT;2|AT;2|TA;1	A/T;0.6786|CA/TG;0.1429|AC/GT;0.0714|AT;0.0714|TA;0.0357	e78099d4-9eb7-44ff-9e1a-72eef83f7733/PCAWG.aeb582ed-4374-4de6-aa73-6b57508ccb2e.bam	bea1137d-9d54-4215-9381-a98dd095ab28/PCAWG.e4ccbda6-c7b3-4bf4-be67-ffe4bf4b1b60.bam	7504125	50	1e-05	4478	1191
6764e0a2-7a78-45c1-9189-6001c6518ce4	BR	192361	92	0.0005	A/T;68|AC/GT;11|CA/TG;5|TA;4|C/G;2|GA/TC;1|AG/CT;1	A/T;0.7391|AC/GT;0.1196|CA/TG;0.0543|TA;0.0435|C/G;0.0217|GA/TC;0.0109|AG/CT;0.0109	24ca61c6-4775-4472-8376-a82c5be38fcd/PCAWG.98fd4b50-d684-4c8b-8400-a4f88e9eaec6.bam	2196f7fd-f798-4276-a195-714017ae7ca6/PCAWG.08182412-3255-4dc5-b767-03161d9fc148.bam	7512322	151	2e-05	14223	2486
8f558713-f32b-403b-aedf-c79efeb41c67	BR	197505	31	0.0002	A/T;28|AT;2|TA;1	A/T;0.9032|AT;0.0645|TA;0.0323	350932f6-c733-497f-9ca0-814d424dce67/PCAWG.a2936dfc-a9b7-442c-ac4a-ec501778d1b4.bam	89e7fa74-111d-4176-8acd-4d0b9e60305d/PCAWG.f8c314db-e175-4ded-a0f6-2733cdd2a67b.bam	7633606	52	1e-05	4597	1133
fc6d77a9-121b-48ab-a899-713c3d1319a2	BR	195811	58	0.0003	A/T;39|AC/GT;8|CA/TG;6|AT;2|TA;2|AG/CT;1	A/T;0.6724|AC/GT;0.1379|CA/TG;0.1034|AT;0.0345|TA;0.0345|AG/CT;0.0172	85cbe37b-ef1e-4048-adc1-18eb72c3a28f/PCAWG.c3eb8b5e-d2f6-4b75-9e92-0f719cac2e2d.bam	fb307283-0e21-430b-9881-cd4b32bac5cc/PCAWG.9fdaaf43-a5b1-4b57-b3da-a5d5d00c4d55.bam	7598656	94	1e-05	9453	1907
987d41ee-6bab-490c-b0f2-bf28c0089de9	BR	195600	205	0.001	A/T;194|C/G;4|AC/GT;3|CA/TG;3|AT;1	A/T;0.9463|C/G;0.0195|AC/GT;0.0146|CA/TG;0.0146|AT;0.0049	40c84dfb-42a0-464e-bbf2-9a3c6bd952d1/PCAWG.064feb9b-d754-4110-8854-747c3512957b.bam	8ab70e8c-1b67-4f08-9d59-686e7444eead/PCAWG.02bdc978-abd0-41a0-8c0d-9b57790430ba.bam	7599216	346	5e-05	17295	2135
d8fbb398-d1da-4444-984a-22c8523625da	BR	197745	47	0.0002	A/T;37|AC/GT;4|CA/TG;3|C/G;1|GA/TC;1|TA;1	A/T;0.7872|AC/GT;0.0851|CA/TG;0.0638|C/G;0.0213|GA/TC;0.0213|TA;0.0213	4c4560ee-1eee-4bce-999a-a3132d93e839/PCAWG.4a7bb94c-f872-4385-9c45-cf43684c905e.bam	039608d1-d476-4711-a259-fdf3678c50e5/PCAWG.6f5ac8e1-96f0-4baf-b7ab-77802f444485.bam	7634821	93	1e-05	17740	2550
f39cc911-36a7-4c06-9e91-4ad86281db3d	BR	182084	95	0.0005	A/T;70|AC/GT;7|CA/TG;7|AT;4|GA/TC;3|C/G;3|TA;1	A/T;0.7368|AC/GT;0.0737|CA/TG;0.0737|AT;0.0421|GA/TC;0.0316|C/G;0.0316|TA;0.0105	a6ee781a-a5ef-477c-91fc-e5d0ba441817/PCAWG.c24945be-a051-4797-b7e6-09b32396f354.bam	30629fec-d298-4364-aa7b-ddc933aeedc9/PCAWG.144dada2-1d8d-47fc-8307-31e64a25bd31.bam	7083176	136	2e-05	4965	1684
7b0b60c7-5fa0-440e-937f-8d82119330d6	BR	189662	77	0.0004	A/T;52|AC/GT;7|CA/TG;7|AT;5|C/G;2|AG/CT;2|GA/TC;1|TA;1	A/T;0.6753|AC/GT;0.0909|CA/TG;0.0909|AT;0.0649|C/G;0.026|AG/CT;0.026|GA/TC;0.013|TA;0.013	b9a49a0b-1f02-4f5e-b0ad-dbfc09bb214f/PCAWG.38c6b56f-3b06-46ea-be92-9acba8cf0a75.bam	80beffe7-9d38-4a4d-b802-09d8b32241e5/PCAWG.0d5b5b1d-5338-4e96-a0d7-f1521fa95cdc.bam	7521371	99	1e-05	4287	1249
4e84eed6-82a8-4e91-b0fd-61ec6ef69ce9	BR	194657	165	0.0008	A/T;133|CA/TG;13|AC/GT;7|C/G;4|AT;2|TA;2|AG/CT;2|ATC/GAT;1|GA/TC;1	A/T;0.8061|CA/TG;0.0788|AC/GT;0.0424|C/G;0.0242|AT;0.0121|TA;0.0121|AG/CT;0.0121|ATC/GAT;0.0061|GA/TC;0.0061	00791661-9472-4388-ba5b-6b86b3a32650/PCAWG.e95f539f-ed8d-47b6-be7c-9a13e89e89a6.bam	167ffe2e-f3b1-4155-a9d9-1b37fdb1b7fa/PCAWG.339f255c-553d-45af-87d7-dc160fd390e2.bam	7585677	212	3e-05	7203	2525
eef9dce1-6ba6-432b-bbe2-53c7dbe64fe7	BR	196145	41	0.0002	A/T;23|CA/TG;6|AC/GT;4|GA/TC;3|AT;2|C/G;1|TA;1|AG/CT;1	A/T;0.561|CA/TG;0.1463|AC/GT;0.0976|GA/TC;0.0732|AT;0.0488|C/G;0.0244|TA;0.0244|AG/CT;0.0244	1efca758-d133-40b0-a114-d9293347cecf/PCAWG.5d1896e5-fd9b-48ab-854b-3b597a81bbc4.bam	942509e0-2301-4518-aad1-bf1dd2bac141/PCAWG.1e2a4eee-1dc9-4195-8359-da95953d897e.bam	7614433	51	1e-05	2552	1291
e8392f20-c9e3-4649-b64f-5b266c393a76	BR	187583	51	0.0003	A/T;35|AC/GT;5|CA/TG;4|AT;2|C/G;2|TA;2|GA/TC;1	A/T;0.6863|AC/GT;0.098|CA/TG;0.0784|AT;0.0392|C/G;0.0392|TA;0.0392|GA/TC;0.0196	2b1c9e5c-d227-42f8-9d05-7bcc15e53b47/PCAWG.fdb7b8a7-7c0e-4738-8766-d58163b3d29b.bam	ba416b5c-95f6-4e54-9af2-d858c648a089/PCAWG.5511ff03-895e-4800-a230-44ce0aaf71e6.bam	7400662	67	1e-05	4669	975
fb9135d9-2acf-41dd-8552-359e6b8c9470	BR	196270	81	0.0004	A/T;75|CA/TG;3|C/G;2|AT;1	A/T;0.9259|CA/TG;0.037|C/G;0.0247|AT;0.0123	6cb6dea7-ed78-4ff7-a59b-ea2813c619b8/PCAWG.8c9b6dac-99cc-4375-a754-08d88cefa6fa.bam	710f81b7-b9a3-476f-905b-d3837ba9712e/PCAWG.8b279d12-923e-4fd2-9286-433d9ffd0415.bam	7601980	124	2e-05	15667	1416
2c6f1862-bb82-4e7e-9cb3-338bdf022ff4	BR	197396	93	0.0005	A/T;84|C/G;4|AC/GT;2|AT;1|CA/TG;1|AACA/TGTT;1	A/T;0.9032|C/G;0.043|AC/GT;0.0215|AT;0.0108|CA/TG;0.0108|AACA/TGTT;0.0108	d106fbb5-640c-4f57-9e09-5323ecb44f1c/PCAWG.67e257c8-c564-4ec5-a116-ec6bfe215e71.bam	252fc3df-1ed5-4671-99ed-fa861d192ab8/PCAWG.39191fee-e58e-4c66-87c7-7de3fff1d4dc.bam	7628516	146	2e-05	5804	948
6dbc5c31-043b-40e9-bf1a-e7b4ec351b4d	BR	194725	45	0.0002	A/T;39|C/G;3|AT;1|CA/TG;1|GA/TC;1	A/T;0.8667|C/G;0.0667|AT;0.0222|CA/TG;0.0222|GA/TC;0.0222	91789b49-bc0f-4aaa-a854-c22ef0a92674/PCAWG.9a8c7c5b-d323-4293-8106-01b3bb7461ba.bam	fce5cd1f-4d55-489a-9f33-acda5165df6c/PCAWG.d857a214-e446-4335-a73a-3ec0aacfe711.bam	7574977	63	1e-05	6142	1078
47312f61-5ef4-4f25-9320-8fbb4758790e	BR	197028	76	0.0004	A/T;71|AT;2|AC/GT;2|C/G;1	A/T;0.9342|AT;0.0263|AC/GT;0.0263|C/G;0.0132	86f12d0a-83a4-4aa3-a81b-cfd9da0813d4/PCAWG.34c7b276-0b4c-4c32-94e7-d2adff9bedd7.bam	621a4e70-6826-4e8a-8367-00308c206b87/PCAWG.29d28f0c-1c26-407a-92f9-b27c0c0601b3.bam	7632406	116	2e-05	12161	1437
f9f04e42-63a2-4ee1-ade4-9e5bb5c20cdd	BR	196292	62	0.0003	A/T;42|AC/GT;10|CA/TG;2|C/G;2|GA/TC;2|AG/CT;2|AT;1|TA;1	A/T;0.6774|AC/GT;0.1613|CA/TG;0.0323|C/G;0.0323|GA/TC;0.0323|AG/CT;0.0323|AT;0.0161|TA;0.0161	438439f8-48be-4223-afe8-83da70644fa2/PCAWG.4b4f9b02-0d1f-42e1-90da-4e805ae9fa7b.bam	5e789376-dfd3-4989-bbbe-be6982d04158/PCAWG.07a937e2-44cb-4c60-8975-a03006f9639a.bam	7622346	85	1e-05	4524	1638
71fda5a9-7049-406f-9348-2c24f7ddf5f4	BR	188266	92	0.0005	A/T;79|AC/GT;5|C/G;4|CA/TG;2|AT;1|AAT/ATT;1	A/T;0.8587|AC/GT;0.0543|C/G;0.0435|CA/TG;0.0217|AT;0.0109|AAT/ATT;0.0109	b0c9d39f-707d-4576-9cdb-a7939bb966ff/PCAWG.b981b3f4-b454-47c5-9660-ac6ca9cdf105.bam	33c0f328-c73e-46dd-a5b1-3df6536cd25c/PCAWG.fa7f0b9f-2d7f-476e-a876-30474d87e46a.bam	7410076	143	2e-05	11419	2545
e55f338f-97e2-4394-ae23-c92606069485	BR	195429	105	0.0005	A/T;79|AC/GT;10|CA/TG;9|GA/TC;3|AG/CT;2|AT;1|TA;1	A/T;0.7524|AC/GT;0.0952|CA/TG;0.0857|GA/TC;0.0286|AG/CT;0.019|AT;0.0095|TA;0.0095	3f961aa1-9628-4d14-8e42-981d67a2e88a/PCAWG.47b69615-c0af-4e29-89af-9b2f3560efb5.bam	d4ead0ae-9754-4ccc-9724-9cbd128a928f/PCAWG.5f506c75-5657-4a22-9dbf-e6f6d75c18b9.bam	7588233	134	2e-05	3429	1923
cc4f9175-a8c8-424a-99d7-8bd11cae0e52	BR	196468	132	0.0007	A/T;118|AC/GT;4|CA/TG;4|TA;3|C/G;2|AT;1	A/T;0.8939|AC/GT;0.0303|CA/TG;0.0303|TA;0.0227|C/G;0.0152|AT;0.0076	a87489d3-cedc-494d-abb0-1adb4db6a208/PCAWG.f669b2f8-01e3-40f7-9be0-769fd40d018e.bam	dea1dcf4-0677-49e4-8883-13697c2dfdbc/PCAWG.7622635e-10f4-4cff-a44e-3d63af2034a2.bam	7610488	182	2e-05	9698	1644
13d05f7a-e16a-40ef-9a15-21257da2cf89	BR	198009	14	0.0001	AC/GT;7|A/T;5|CA/TG;1|TA;1	AC/GT;0.5|A/T;0.3571|CA/TG;0.0714|TA;0.0714	a08f5699-d2c8-4f01-8865-c0be67716a27/PCAWG.778ebd16-9794-48bd-a2b0-79afcb5fea74.bam	e3ad5fe1-b0c8-4798-9b00-ca4fe7ae5f29/PCAWG.2dde803b-eb4c-4219-a756-3fe25fad0a8a.bam	7640862	24	0	2922	968
d5372745-95cf-4572-a6e7-e7f5b796911a	BR	198002	50	0.0003	A/T;42|C/G;3|AC/GT;2|CA/TG;2|AT;1	A/T;0.84|C/G;0.06|AC/GT;0.04|CA/TG;0.04|AT;0.02	0d2c22f7-c8bf-4627-a06b-f06a0bd89cf7/PCAWG.f8cc7a38-7725-4ef4-98a5-427cb116d9c3.bam	2b285151-0370-45f3-80f5-1425f508cb5f/PCAWG.ef8914fd-cb87-4380-86e2-2633ba876665.bam	7638020	80	1e-05	8666	2048
aacaba97-ecde-440b-aae0-0e9c608c4b24	BR	198334	83	0.0004	A/T;79|AC/GT;1|CA/TG;1|C/G;1|GA/TC;1	A/T;0.9518|AC/GT;0.012|CA/TG;0.012|C/G;0.012|GA/TC;0.012	683113e6-2166-4983-a002-6949df1f010e/PCAWG.e667d676-68ff-4d4d-b81c-e89739663d08.bam	02c782f3-a05a-415b-8c74-088d5e5e71a1/PCAWG.c065719a-770e-4f87-b592-6c2035cd056a.bam	7646000	127	2e-05	5227	1150
25c76a8f-77c0-4650-bddf-45ed0c10a2e6	BR	195961	56	0.0003	A/T;50|AC/GT;2|CA/TG;2|C/G;2	A/T;0.8929|AC/GT;0.0357|CA/TG;0.0357|C/G;0.0357	bb36499f-ecca-4e86-b117-10d8f17af385/PCAWG.f3168c30-697b-430f-8483-7ab3e4b23ecf.bam	dda886ac-2e9b-4e9d-b756-cdf9165a81f1/PCAWG.f064cc30-9b22-47d5-9727-02f40a25e100.bam	7592345	136	2e-05	9365	2627
1bb3a1c7-4d7b-4fb6-b54d-e94cbd0e32aa	BR	197900	12	0.0001	A/T;5|AC/GT;3|CA/TG;2|C/G;1|AAC/GTT;1	A/T;0.4167|AC/GT;0.25|CA/TG;0.1667|C/G;0.0833|AAC/GTT;0.0833	8adb20f4-ae1b-4ec9-b766-ba452deeb98a/PCAWG.a9cfaf7f-7d15-4701-873f-b6284c9ecf65.bam	049690c9-a216-4867-b357-859c1d733b48/PCAWG.46f30746-20e5-4159-bb2d-6393c536f2fe.bam	7631604	13	0	11020	1211
df291849-4c35-44e1-b013-8f6b7ee36113	BR	193853	120	0.0006	A/T;108|AC/GT;3|CA/TG;2|GA/TC;2|C/G;2|TA;2|AT;1	A/T;0.9|AC/GT;0.025|CA/TG;0.0167|GA/TC;0.0167|C/G;0.0167|TA;0.0167|AT;0.0083	92bb6d7e-40bf-48bc-af42-98c3520785c1/PCAWG.12e80eb4-6cc5-4ee8-8cf6-f8676ea4abd5.bam	3d58bc0d-3586-4971-98d1-f5c471cb7c48/PCAWG.b6c859ea-87f2-4276-9343-2d5365373f7b.bam	7482715	156	2e-05	7973	1913
c61ded54-f80e-4da8-b1d8-e22551c96118	BR	196445	55	0.0003	A/T;44|CA/TG;6|AC/GT;3|C/G;1|GA/TC;1	A/T;0.8|CA/TG;0.1091|AC/GT;0.0545|C/G;0.0182|GA/TC;0.0182	255d3d4f-d65e-4a1b-918a-6a18289df12f/PCAWG.0d3bf79d-f45b-4064-837c-63f1b059186c.bam	5649c178-a375-4e50-ac27-49c21661176f/PCAWG.0124c228-3b8b-4240-a9a3-1e601015e2c1.bam	7594652	77	1e-05	6288	1421
c67409b2-ac25-42a0-8543-4636ef132fe4	BR	191266	72	0.0004	A/T;52|AC/GT;10|CA/TG;5|GA/TC;4|AT;1	A/T;0.7222|AC/GT;0.1389|CA/TG;0.0694|GA/TC;0.0556|AT;0.0139	bf316432-7184-4c0f-81ca-29d3555f5c0b/PCAWG.17ba4146-78ba-4615-9b09-62c835bd6808.bam	4aba88dc-88f4-4e82-963d-6bac82b3a584/PCAWG.29555bb4-dc7e-4fd7-8c5f-ef28f0f3a539.bam	7504918	99	1e-05	5324	1468
6d7f44df-e9f0-4542-a6d8-d14ee7804002	BR	196387	35	0.0002	A/T;24|CA/TG;4|AC/GT;2|AG/CT;2|AT;1|GA/TC;1|TA;1	A/T;0.6857|CA/TG;0.1143|AC/GT;0.0571|AG/CT;0.0571|AT;0.0286|GA/TC;0.0286|TA;0.0286	ade86f53-eeb1-4b94-92cf-5442834ac693/PCAWG.8962335a-b408-4e29-a2aa-2534f7939bcd.bam	7e006885-04cf-441a-afe9-420cf5cf8163/PCAWG.bf0b577b-9362-47f5-a2d9-c177f4f63faf.bam	7613623	46	1e-05	2823	827
a6c14ebc-81a2-44f7-af87-2b7ec85e5696	BR	197229	66	0.0003	A/T;57|AC/GT;5|C/G;3|AT;1	A/T;0.8636|AC/GT;0.0758|C/G;0.0455|AT;0.0152	1c4662e8-d898-494c-94e1-ff65272483c0/PCAWG.2980bd39-5e30-4e15-8ed1-b5e0b0d680db.bam	1bc8c7ab-2ee9-4fde-9f23-84aa512bf324/PCAWG.bcaded8b-e416-42be-978f-b2eae85194fc.bam	7624276	104	1e-05	6101	1273
07b5141f-ac79-439b-883b-b0183bbe7ff5	BR	186899	236	0.0013	A/T;176|CA/TG;21|AC/GT;17|C/G;5|TA;5|AG/CT;5|AT;4|GA/TC;3	A/T;0.7458|CA/TG;0.089|AC/GT;0.072|C/G;0.0212|TA;0.0212|AG/CT;0.0212|AT;0.0169|GA/TC;0.0127	8e624492-5436-447d-b9e3-0a90c8c705e3/PCAWG.2479421e-859f-4fe3-b32f-20d919e82726.bam	55f346b6-2dfd-4ca3-971e-f99c36caa7d1/PCAWG.0bc05048-9e45-4a8b-aa79-25b7d5b0c17e.bam	7426735	355	5e-05	12318	3377
98bb3025-0637-4106-8621-12df7b5d662f	BR	196890	62	0.0003	A/T;46|AC/GT;8|CA/TG;4|AT;1|GA/TC;1|C/G;1|AG/CT;1	A/T;0.7419|AC/GT;0.129|CA/TG;0.0645|AT;0.0161|GA/TC;0.0161|C/G;0.0161|AG/CT;0.0161	882b8dd0-e723-48ba-a5e4-a4f601467bb8/PCAWG.285f164e-24f4-4bb5-8cf7-ae27f2b97d54.bam	9992a047-a3ee-4f46-a094-dca190776ad3/PCAWG.bc29a8d7-54b5-4012-b6fc-4ba09c637628.bam	7619123	84	1e-05	47603	1513
2290b078-6a5b-4c83-9dfb-b525bbf14e4e	BR	195641	196	0.001	A/T;179|AC/GT;6|C/G;4|TA;4|AT;1|CA/TG;1|AG/CT;1	A/T;0.9133|AC/GT;0.0306|C/G;0.0204|TA;0.0204|AT;0.0051|CA/TG;0.0051|AG/CT;0.0051	3e97e9a4-cf7c-4214-9ab3-4a7972333c37/PCAWG.3b61a905-aa50-4c9f-b9db-280fd9f49daa.bam	658498c9-69fe-4f2c-a0da-fe293442772e/PCAWG.b2dded26-d31c-4274-9d74-57317f2b183e.bam	7585200	282	4e-05	8501	2377
36d1a85e-a09b-4537-86e0-eaf1eb03aed8	BR	180431	31	0.0002	A/T;22|C/G;3|CA/TG;2|GA/TC;2|TA;1|AG/CT;1	A/T;0.7097|C/G;0.0968|CA/TG;0.0645|GA/TC;0.0645|TA;0.0323|AG/CT;0.0323	f178de4c-7fe6-43d4-b982-8682a172f540/PCAWG.e2b7e9f3-e2db-4e89-b5e9-9cdc203499d9.bam	ffd3a5d3-1d5b-47df-8aa0-9c874c2d5d9a/PCAWG.58b5d864-f885-48cb-88b7-031637a468c4.bam	7048921	61	1e-05	7332	1194
15f90ef0-831b-40a3-98bd-ec226a9e8b26	BR	188442	208	0.0011	A/T;179|AC/GT;13|CA/TG;7|AT;2|C/G;2|TA;2|ACACA/TGTGT;1|GA/TC;1|AG/CT;1	A/T;0.8606|AC/GT;0.0625|CA/TG;0.0337|AT;0.0096|C/G;0.0096|TA;0.0096|ACACA/TGTGT;0.0048|GA/TC;0.0048|AG/CT;0.0048	27a3fd92-2745-418d-b148-a6396b0dec0f/PCAWG.dd5f934e-937a-4c21-b0cf-76b71d8028e2.bam	b088f580-8df0-42f7-b490-e77a32a24eef/PCAWG.8aae02db-d7ce-4cd1-9922-2d354f3518ec.bam	7471439	265	4e-05	5522	2177
74039acd-5aca-4c65-818c-3b577d295be0	BR	194747	57	0.0003	A/T;40|CA/TG;5|AC/GT;4|C/G;3|TA;3|GA/TC;1|AG/CT;1	A/T;0.7018|CA/TG;0.0877|AC/GT;0.0702|C/G;0.0526|TA;0.0526|GA/TC;0.0175|AG/CT;0.0175	7157d2ab-31a5-4433-a7ae-aca5f15dc80c/PCAWG.272b1a5b-c7fc-4aca-8f78-1d9b1012277f.bam	113e833e-d750-4f69-9f25-0166964cf15a/PCAWG.e8e9e34b-c40e-4073-a712-f27dc35753a9.bam	7578024	80	1e-05	5316	1343
b27d75ba-5989-4200-bfe9-f1b7d7cf8008	BR	197132	36	0.0002	A/T;26|AC/GT;4|CA/TG;3|AT;1|ACACA/TGTGT;1|GATA/TATC;1	A/T;0.7222|AC/GT;0.1111|CA/TG;0.0833|AT;0.0278|ACACA/TGTGT;0.0278|GATA/TATC;0.0278	0454a4fb-a30a-48f2-a964-d53e6d7d5049/PCAWG.83ec6937-850a-4be7-9212-4dd20780b670.bam	c5ec8b3e-c738-4e07-b300-e64c791658f6/PCAWG.c8e7bbdb-6d87-445f-bf43-dbf88805b1ed.bam	7625795	59	1e-05	12496	1969
97064332-1d4f-4571-93ff-354ffe6d7df9	BR	136670	25	0.0002	A/T;23|AC/GT;2	A/T;0.92|AC/GT;0.08	a3fdb58b-0665-429b-8947-dff9fe6d55ba/PCAWG.b43c9b79-be36-496a-8fa0-29ecdfa2d315.bam	93b39b17-866d-4359-80a1-67610a02f679/PCAWG.04d09fee-cfda-4d8a-80fe-9ad96d8fefb2.bam	6000024	42	1e-05	5483	888
8e03e773-5557-4e78-889b-4710c515378f	BR	196128	182	0.0009	A/T;163|AC/GT;6|C/G;6|CA/TG;3|AG/CT;2|GA/TC;1|TA;1	A/T;0.8956|AC/GT;0.033|C/G;0.033|CA/TG;0.0165|AG/CT;0.011|GA/TC;0.0055|TA;0.0055	e1a8a153-0803-4a81-954a-6bcb083a2cb6/PCAWG.4d594f8a-70ed-47ad-9383-0692b946b998.bam	e40f72d6-9cf5-4b18-8f55-35753e3730f6/PCAWG.a5bb0916-d7f4-4840-94eb-205dd369972e.bam	7595138	266	4e-05	12657	2591
41f140b8-72b9-4ae3-8b25-6144d9f94d0f	BR	197558	21	0.0001	A/T;18|CA/TG;2|AC/GT;1	A/T;0.8571|CA/TG;0.0952|AC/GT;0.0476	6fd958ae-2e6e-4664-9f3c-876570d1da04/PCAWG.dd5ea83d-2654-41cd-bc4e-675bb7e668a0.bam	937470d4-8e43-4074-a0a9-fe95f3a2f64d/PCAWG.dc310a34-1cc4-41bd-8279-3e1997f7864b.bam	7636551	33	0	5397	736
30dbe353-86d5-40ed-84c2-dbddf7beb17b	BR	197525	30	0.0002	A/T;17|AC/GT;6|GA/TC;3|CA/TG;2|AT;1|AG/CT;1	A/T;0.5667|AC/GT;0.2|GA/TC;0.1|CA/TG;0.0667|AT;0.0333|AG/CT;0.0333	b6b41343-59ee-4d1b-90d4-c7315861933c/PCAWG.4639f9ce-56a7-4eb7-b17e-09a55a44bee3.bam	51b8c8d4-5219-4d19-9818-6ca2fdd23fd2/PCAWG.2ba861be-44cf-4d68-80f1-186b34c48cda.bam	7626394	42	1e-05	1917	979
2b000af3-2c9d-4eaa-af3f-8101b7425c37	BR	188835	112	0.0006	A/T;80|CA/TG;9|AC/GT;8|AG/CT;5|TA;4|AT;3|GA/TC;2|C/G;1	A/T;0.7143|CA/TG;0.0804|AC/GT;0.0714|AG/CT;0.0446|TA;0.0357|AT;0.0268|GA/TC;0.0179|C/G;0.0089	5f7ef589-00ba-46c8-8dbc-3e7c878deade/PCAWG.741527d2-6828-4b68-858e-96a03431a429.bam	585cee43-af17-4dd5-a694-2d12cb935b00/PCAWG.97c4edeb-05f8-45f2-a2b4-f4ff29471227.bam	7440435	142	2e-05	6165	1819
546b982f-60d9-43df-9761-09369afbee2d	BR	197812	34	0.0002	A/T;31|C/G;2|TA;1	A/T;0.9118|C/G;0.0588|TA;0.0294	cc3506e2-7482-4077-8af4-9f267ed4c5a6/PCAWG.8b94dc69-959c-4a01-b17d-4ce4912ecfad.bam	e5bbcdb4-25fb-44b0-ab2a-ae42244742a2/PCAWG.93760b0d-0e2f-4f55-bd67-9e4a9c956dbd.bam	7636656	53	1e-05	3458	478
6c8e9197-fd16-4fed-bfda-e349cab26314	BR	197880	35	0.0002	A/T;30|AC/GT;2|CA/TG;1|C/G;1|AG/CT;1	A/T;0.8571|AC/GT;0.0571|CA/TG;0.0286|C/G;0.0286|AG/CT;0.0286	b3667088-e65b-4141-9329-1252481b3463/PCAWG.22a130c7-fa78-4777-acde-baa79c8dcbe7.bam	6cfb9797-99e6-4cf5-8b2b-746025696b04/PCAWG.8244953d-ebe8-4a88-a547-00185b4cb18a.bam	7636186	65	1e-05	9802	1487
eddfbfb9-3ae8-449b-b870-46062a2571c1	BR	172211	37	0.0002	A/T;28|AC/GT;3|CA/TG;2|TA;2|C/G;1|AG/CT;1	A/T;0.7568|AC/GT;0.0811|CA/TG;0.0541|TA;0.0541|C/G;0.027|AG/CT;0.027	7180d988-7d56-439a-96fc-0db9f848360f/PCAWG.385801ff-b732-4515-8c7d-ca2a71ee83e1.bam	c16c5b39-d4c3-4398-a7ef-4d8813351767/PCAWG.bd267985-8d5e-41d0-b511-354642d1a6c0.bam	7021487	67	1e-05	9807	1256
9032b7fe-e38a-4641-a45e-67041668adc4	BR	196140	35	0.0002	A/T;24|AC/GT;3|CA/TG;3|TA;2|AT;1|CATC/GATG;1|AG/CT;1	A/T;0.6857|AC/GT;0.0857|CA/TG;0.0857|TA;0.0571|AT;0.0286|CATC/GATG;0.0286|AG/CT;0.0286	11a0518e-5f27-4084-96ab-c182e798fc68/PCAWG.93367159-5797-4a9e-b658-a74750a347e8.bam	bb0357ef-4086-46a5-b3cc-f2f1a2004c21/PCAWG.9700bf2c-e700-4a7a-ae0d-154fce501550.bam	7594628	69	1e-05	9578	1961
418e916b-7a4e-4fab-8616-15dcec4d79f8	BR	182280	152	0.0008	A/T;131|CA/TG;9|AC/GT;4|AT;2|C/G;2|TA;2|AG/CT;2	A/T;0.8618|CA/TG;0.0592|AC/GT;0.0263|AT;0.0132|C/G;0.0132|TA;0.0132|AG/CT;0.0132	ff2657e2-0d4b-4dab-8e3e-f041d3801384/PCAWG.b32e0cea-678c-47f5-8c03-c9c99955025c.bam	f945990a-00d4-4cef-848b-8f145dd27601/PCAWG.2cfe323e-a7c1-4d7c-8b49-dbb4df3ce0ed.bam	7307375	217	3e-05	11261	2189
9ddf2119-a222-4fa5-a9f3-0bec7eeea36b	BR	194812	78	0.0004	A/T;66|AT;2|AC/GT;2|C/G;2|GA/TC;2|AG/CT;2|CA/TG;1|TA;1	A/T;0.8462|AT;0.0256|AC/GT;0.0256|C/G;0.0256|GA/TC;0.0256|AG/CT;0.0256|CA/TG;0.0128|TA;0.0128	78331830-6b59-486b-b88a-b4667b138b1e/PCAWG.269387d9-06f5-47df-a57e-39235645fa38.bam	11cc20bb-5bc0-469d-8700-eaa43267ce6f/PCAWG.022b1379-c033-4e17-9365-a7e366e1a6b6.bam	7549963	116	2e-05	18964	2185
fe04d042-a4cc-4a14-8197-415ea40951aa	BR	195444	107	0.0005	A/T;91|AC/GT;6|AT;3|CA/TG;3|C/G;2|GA/TC;1|TA;1	A/T;0.8505|AC/GT;0.0561|AT;0.028|CA/TG;0.028|C/G;0.0187|GA/TC;0.0093|TA;0.0093	47333035-cbce-48f1-a073-99124e384359/PCAWG.c551843b-2222-497b-bb53-5a9142539367.bam	a58c75df-cb73-445c-b954-86f87708ad06/PCAWG.bd595e18-dd12-432c-b72a-0bb9788a0817.bam	7599973	219	3e-05	26440	3825
27f87d1e-2c32-4beb-9677-62f7a286673d	BR	194240	60	0.0003	A/T;56|AT;1|CA/TG;1|GA/TC;1|TA;1	A/T;0.9333|AT;0.0167|CA/TG;0.0167|GA/TC;0.0167|TA;0.0167	ffc44aec-c852-46ad-b8ba-002b14942db6/PCAWG.2f580b69-5432-466f-b403-02d306088600.bam	9ac55bd6-4a07-454d-8d47-b3ade2561101/PCAWG.0a1fe8b4-3496-4319-b239-b8104cab499f.bam	7564398	93	1e-05	5626	1071
f8f749b7-547d-49fa-9da2-44eed962b6fd	BR	197794	70	0.0004	A/T;61|C/G;4|CA/TG;2|TA;2|AC/GT;1	A/T;0.8714|C/G;0.0571|CA/TG;0.0286|TA;0.0286|AC/GT;0.0143	7bbb40b0-b7bb-4c80-93ed-b48b107fc53b/PCAWG.8d55f01b-8dfe-4460-a1cc-9aa300b3cfd5.bam	62174ffc-6292-4be2-aa66-cd6075d64b2a/PCAWG.758a7eb7-eb38-48b7-8896-d1502c76f4a0.bam	7637043	101	1e-05	10880	920
73936e8b-c893-4afd-bd1f-be90c06a4869	BR	195117	186	0.001	A/T;170|AC/GT;7|C/G;3|GA/TC;2|TA;2|AT;1|CA/TG;1	A/T;0.914|AC/GT;0.0376|C/G;0.0161|GA/TC;0.0108|TA;0.0108|AT;0.0054|CA/TG;0.0054	93781a05-0459-4178-b87e-3db6cbf94c03/PCAWG.0e7b8948-9007-450a-ac99-435372419b17.bam	c39a54bd-f51a-4a2a-a71f-3b5873ccb998/PCAWG.56b35675-497a-4e88-b6da-ef3b6ded2154.bam	7573252	275	4e-05	5311	2255
25e4cad7-2403-4992-9cbc-433574673549	BR	190067	43	0.0002	A/T;35|CA/TG;4|AC/GT;2|TA;1|AG/CT;1	A/T;0.814|CA/TG;0.093|AC/GT;0.0465|TA;0.0233|AG/CT;0.0233	9010e063-8bdd-4a05-bbd9-64f0d7b835ce/PCAWG.311ec0ec-d4a4-4d45-b6d8-f2c1dca1b611.bam	46c0fa7c-f0f3-445e-9098-43a644c09f92/PCAWG.691cdac4-3120-4377-9655-25391398d92e.bam	7439524	57	1e-05	3269	1427
db45d81f-695c-4f99-beea-6dbec1ff47fc	BR	197680	43	0.0002	A/T;37|CA/TG;3|AC/GT;1|C/G;1|GA/TC;1	A/T;0.8605|CA/TG;0.0698|AC/GT;0.0233|C/G;0.0233|GA/TC;0.0233	4375d577-9e24-47b2-9dcb-8a7daf9f9e16/PCAWG.57f31c04-ba0a-4aa6-82d7-2a8fe5a1319b.bam	3ba763f8-86f4-4f65-93ec-003b14a8031f/PCAWG.267f1705-12bb-485e-9e72-bb616b24f059.bam	7637332	95	1e-05	24334	2216
467ef778-f481-44f3-9768-b9900252d2ba	BR	192509	27	0.0001	A/T;20|CA/TG;5|AT;1|C/G;1	A/T;0.7407|CA/TG;0.1852|AT;0.037|C/G;0.037	df6bd8ac-3e9e-45d2-878b-d3fa22b9ef38/PCAWG.b82de11e-f66f-40c5-b4c6-912bc612162e.bam	5b478efe-eeac-42b4-b4a1-8d270f1c9e5a/PCAWG.912289ca-9b8c-4b62-8bc6-b280f47a5513.bam	7522120	52	1e-05	10570	2218
7b08e810-f3c9-4155-ac11-f45a3a4f8b41	BR	180254	30	0.0002	A/T;24|AC/GT;2|C/G;2|AT;1|CA/TG;1	A/T;0.8|AC/GT;0.0667|C/G;0.0667|AT;0.0333|CA/TG;0.0333	3b2936c2-d6bd-4a6f-bc2a-d93819c0e365/PCAWG.1861ba24-9870-49cc-aa21-0228250d45a5.bam	825ae0cd-214b-4763-8290-e3572b2ed2f7/PCAWG.3b85b93f-b9f3-46da-8faa-63bae9903889.bam	7191248	62	1e-05	10238	1496
5dbf3203-ce73-41e4-bf9a-32fc856f73f5	BR	188666	74	0.0004	A/T;57|CA/TG;7|AC/GT;4|AT;3|GA/TC;2|TA;1	A/T;0.7703|CA/TG;0.0946|AC/GT;0.0541|AT;0.0405|GA/TC;0.027|TA;0.0135	7aecebb6-5cf3-43af-b84a-3ae88368aa3a/PCAWG.8cfe9d6a-b412-47e8-8eee-e84b02f76c0a.bam	8f0ce179-a754-464d-84b6-31f8a1a8f77f/PCAWG.bf9e4936-6222-42eb-aecd-2f15c6811b1a.bam	7434217	114	2e-05	19625	2850
6c65cb6d-8c50-4c7c-bc84-eeebe09fbe01	BR	179689	145	0.0008	A/T;121|AC/GT;9|CA/TG;6|GA/TC;4|TA;2|AT;1|ATC/GAT;1|AG/CT;1	A/T;0.8345|AC/GT;0.0621|CA/TG;0.0414|GA/TC;0.0276|TA;0.0138|AT;0.0069|ATC/GAT;0.0069|AG/CT;0.0069	b9ce997f-46fb-4872-a033-cefbdd0bef8f/PCAWG.d990ac48-dd92-48eb-ad07-29f27b7249a2.bam	cabcf9af-59e8-4ef9-87f9-04bc9a77fdc0/PCAWG.95fde0b0-601e-4181-95a6-b3034014b1ac.bam	7110936	187	3e-05	5882	2426
47b5d831-5287-4f62-b17a-6e5eff2e4184	BR	197353	76	0.0004	A/T;57|AC/GT;10|CA/TG;7|GA/TC;1|AG/CT;1	A/T;0.75|AC/GT;0.1316|CA/TG;0.0921|GA/TC;0.0132|AG/CT;0.0132	6ffd08bf-931c-4da2-9432-f3ba1ee49d02/PCAWG.4140ef27-e23a-4e5b-8cc0-02d97d44b74a.bam	2f296cc3-3fdf-48f7-9c31-ef239024b99c/PCAWG.353a27de-f667-4bf7-9d49-32b4f75bd452.bam	7625790	105	1e-05	4977	1510
8691c87f-2468-44bb-a670-3dccd6da33c6	BR	192810	33	0.0002	A/T;27|AC/GT;2|CA/TG;2|TA;1|AATGG/CCATT;1	A/T;0.8182|AC/GT;0.0606|CA/TG;0.0606|TA;0.0303|AATGG/CCATT;0.0303	546df871-3f1b-446e-a86d-624e490298cd/PCAWG.7b3754e5-07c9-462a-8a2b-a10874da7565.bam	96d74c15-1fbe-4852-bb1a-7a62905d7d69/PCAWG.6f7d23f9-ae54-4e1f-8a84-6f6679aff09b.bam	7550152	59	1e-05	15914	618
d8c6d4b8-f279-4edc-aaa3-a1cc266aec4d	BR	198097	68	0.0003	A/T;62|CA/TG;2|C/G;2|AT;1|AC/GT;1	A/T;0.9118|CA/TG;0.0294|C/G;0.0294|AT;0.0147|AC/GT;0.0147	3a6661e9-b388-4968-b117-86017ca50cae/PCAWG.f385d668-76a0-4bcc-a221-4612288f8e42.bam	8fc5f4ee-deb0-4890-aa46-f1219b935705/PCAWG.a0194549-6c93-4c7b-af3d-2c97f8c0879a.bam	7643559	106	1e-05	13829	1223
110b5f05-ded7-45ec-b0f6-a941c92d77dd	BR	164549	28	0.0002	A/T;21|CA/TG;2|AC/GT;1|AT;1|GA/TC;1|C/G;1|TA;1	A/T;0.75|CA/TG;0.0714|AC/GT;0.0357|AT;0.0357|GA/TC;0.0357|C/G;0.0357|TA;0.0357	43a1cd52-eadf-4eea-81e7-c673a44ca5ab/PCAWG.dd416c92-2136-4685-b7c8-234944159dde.bam	badf37ff-5ebb-448f-b62d-458cbfb0c1fe/PCAWG.23c18105-3eaf-4de5-81f2-90593277fb81.bam	6671810	45	1e-05	11263	1319
aa58c09a-7799-4675-8310-d270224b163e	BR	193555	33	0.0002	A/T;24|AC/GT;6|CA/TG;3	A/T;0.7273|AC/GT;0.1818|CA/TG;0.0909	63da0dc1-96a0-436a-8ec7-855802b79f0f/PCAWG.0f1dc162-b5e1-4157-946f-672268786f91.bam	02cf8459-7179-4dd5-bf4b-d3ad04f23451/PCAWG.f0fcbe5d-335f-4c5e-ab71-77ab26c4972d.bam	7519367	50	1e-05	2989	1241
987528ac-437a-4eb8-a335-4f2076d5c006	BR	180169	229	0.0013	A/T;213|CA/TG;6|AT;4|AC/GT;3|C/G;1|GA/TC;1|TA;1	A/T;0.9301|CA/TG;0.0262|AT;0.0175|AC/GT;0.0131|C/G;0.0044|GA/TC;0.0044|TA;0.0044	7479b0aa-798a-4615-8c60-0458696d4bee/PCAWG.45840782-3434-45f4-be3b-b0d2ea92ec0b.bam	649630d6-3318-4e29-b003-71980bbde398/PCAWG.4e4fd519-4e5b-41f0-be68-f9ecc833e4bd.bam	7178334	335	5e-05	17599	3858
13c312ec-0add-4758-ab8d-c193e2e08c6d	BR	197229	46	0.0002	A/T;35|CA/TG;4|AC/GT;2|GA/TC;2|C/G;1|TA;1|AG/CT;1	A/T;0.7609|CA/TG;0.087|AC/GT;0.0435|GA/TC;0.0435|C/G;0.0217|TA;0.0217|AG/CT;0.0217	0d41fabf-025f-418f-b0ad-50892bd735b1/PCAWG.37cc3f26-7a81-47e8-b66d-4a7a0085c8b2.bam	d069277c-ffe8-408c-81e7-3a72844b09ef/PCAWG.4d8f5e7c-d7fc-4469-839f-3ea547bf871c.bam	7623288	64	1e-05	3313	1185
5b7d5767-2037-4175-aec9-886776343181	BR	197665	77	0.0004	A/T;70|AC/GT;4|AT;1|CA/TG;1|C/G;1	A/T;0.9091|AC/GT;0.0519|AT;0.013|CA/TG;0.013|C/G;0.013	21fc6af7-11e9-42c9-9d8e-ebde817e9469/PCAWG.6e729e43-e906-4767-812d-b31d537664f9.bam	503c468e-e44f-48be-91fc-69e7a80f5cc2/PCAWG.76966014-9acd-4643-9d5a-b55836f5b4e9.bam	7635119	114	1e-05	8617	1529
b752b444-f033-4be4-9d24-e5e80b4181af	BR	162578	45	0.0003	A/T;35|AC/GT;5|CA/TG;3|AT;1|C/G;1	A/T;0.7778|AC/GT;0.1111|CA/TG;0.0667|AT;0.0222|C/G;0.0222	e4c403f3-09e6-42ca-93b6-f30247bbd8ea/PCAWG.49d40d69-bd53-4b70-b66a-a387ac81f5db.bam	c9284e6b-fa37-4085-b88e-5b56bac3849d/PCAWG.e46e9b2f-1eb0-49c6-84fd-ebb4db64c4d8.bam	6717337	80	1e-05	9814	1820
5a535c49-d42e-43c6-9d32-dc76f28d4f0f	BR	196599	142	0.0007	A/T;98|AC/GT;14|CA/TG;14|TA;5|AG/CT;5|AT;3|GA/TC;3	A/T;0.6901|AC/GT;0.0986|CA/TG;0.0986|TA;0.0352|AG/CT;0.0352|AT;0.0211|GA/TC;0.0211	ee866c04-9e29-40d5-9a8d-9c6226f338eb/PCAWG.86568564-8463-4588-b43c-b4e205cf3cb6.bam	bb07e025-8aab-41fd-8bc0-b5af2d50b2d9/PCAWG.0d9f2c17-dfac-41d9-a258-003c1e480518.bam	7621860	163	2e-05	3452	2195
84c77098-03d0-4b22-afb1-797703e85c6c	BR	192698	83	0.0004	A/T;54|AC/GT;10|CA/TG;9|AG/CT;6|TA;3|C/G;1	A/T;0.6506|AC/GT;0.1205|CA/TG;0.1084|AG/CT;0.0723|TA;0.0361|C/G;0.012	53df1157-5174-4103-adb1-564ca88240d7/PCAWG.0c6de04c-ff05-4a5f-beb2-23af602ed90b.bam	fbf3fd39-5b48-474a-8a88-7c7e60215d36/PCAWG.6c7c954f-ed03-4053-91ae-9832111c6922.bam	7542284	122	2e-05	12272	1551
4d409156-3a36-4c63-9ad6-b6af34f27b06	BR	195416	54	0.0003	A/T;46|AC/GT;4|CA/TG;2|GA/TC;1|C/G;1	A/T;0.8519|AC/GT;0.0741|CA/TG;0.037|GA/TC;0.0185|C/G;0.0185	7c5ce223-ef44-4b24-a692-f4218ac481af/PCAWG.471f9500-1daa-45bd-8743-e8044f2a7f93.bam	b9f5021f-d1b7-4f68-9064-74aae7e9d19c/PCAWG.9627201d-6cd4-41c9-8249-36f69a7005ed.bam	7586927	81	1e-05	6892	1290
ddc7377d-82c3-480a-be3c-3d1da52c77d4	BR	198110	22	0.0001	A/T;19|CA/TG;1|GA/TC;1|TA;1	A/T;0.8636|CA/TG;0.0455|GA/TC;0.0455|TA;0.0455	982bab9b-594e-4caa-8355-026c71533675/PCAWG.03e8aa4f-c18e-422d-ac34-c8c0a66f6fae.bam	00782db7-af61-483f-b130-c7f7d3e145d6/PCAWG.cebba3c0-3dbf-46c1-ad6f-190fad4bc451.bam	7643791	50	1e-05	34338	943
207f8a42-5b05-4876-b0ae-ebfaeea27844	BR	196945	50	0.0003	A/T;45|AC/GT;2|CA/TG;1|C/G;1|AG/CT;1	A/T;0.9|AC/GT;0.04|CA/TG;0.02|C/G;0.02|AG/CT;0.02	95541ebf-c540-4634-9ff1-c85c43a0de3a/PCAWG.a31098f6-069b-4e0f-bfa4-2436ed3f2c83.bam	c9c1e5cd-b770-4a5c-bc2b-b2ef79a9bcd2/PCAWG.95f4764f-dff6-49aa-80dc-6d7b2b1c020a.bam	7617895	94	1e-05	10047	2140
ea43434b-197e-48ac-ae2e-46bc7f3776de	BR	162496	208	0.0013	A/T;185|AC/GT;7|C/G;5|CA/TG;4|GA/TC;3|AT;2|TA;1|AG/CT;1	A/T;0.8894|AC/GT;0.0337|C/G;0.024|CA/TG;0.0192|GA/TC;0.0144|AT;0.0096|TA;0.0048|AG/CT;0.0048	f7ae1aaf-e6ac-4bb9-8b67-c3b30be99481/PCAWG.aa1232dd-5839-4b48-9b9d-b309c160d8e8.bam	8e1fcbf2-f912-4942-8208-12516694a750/PCAWG.d5115b50-b8bd-4ac4-9c94-4e344963f9b1.bam	6559463	300	5e-05	21129	4608
01658141-8398-4585-9f0f-8355dd9b0604	BR	194084	214	0.0011	A/T;199|C/G;4|AT;2|AC/GT;2|CA/TG;2|GA/TC;2|TA;2|AG/CT;1	A/T;0.9299|C/G;0.0187|AT;0.0093|AC/GT;0.0093|CA/TG;0.0093|GA/TC;0.0093|TA;0.0093|AG/CT;0.0047	802df3ae-94fc-4605-8201-209bd062e4e6/PCAWG.3c879c6c-ea75-459f-8b88-44667106c64d.bam	cf9d4b01-7ab6-4d2a-bdbc-cd3b6238ad06/PCAWG.35b97fc7-79ee-43ab-939f-c83e5a87d68e.bam	7547450	293	4e-05	24700	2219
7456abd5-303e-4e6f-bf4e-47efefc7310f	BR	195029	29	0.0001	A/T;21|C/G;3|AT;2|AC/GT;2|GA/TC;1	A/T;0.7241|C/G;0.1034|AT;0.069|AC/GT;0.069|GA/TC;0.0345	bb63d42a-03a3-4dbc-9905-5a8f1947ef66/PCAWG.e30809d1-0292-436a-bb39-a9fa4222336a.bam	0068b7d0-92bb-48d3-b4d2-11bebc4ba785/PCAWG.a67f66e5-5e6f-4ca0-9464-6ddc103e8bc6.bam	7581664	43	1e-05	5734	1242
f6114c69-71a1-47d5-9b28-b0227b1872f7	BR	191248	65	0.0003	A/T;60|CA/TG;3|C/G;2	A/T;0.9231|CA/TG;0.0462|C/G;0.0308	515b18fc-b8c2-4f97-b7cc-d3b3a01a7f36/PCAWG.46b76580-ab31-4d29-9b6e-cb219d24f114.bam	fda3cad1-6c76-4d49-8177-f1785001ed0f/PCAWG.734f4d36-312a-4dca-b627-f96cff88c09f.bam	7497755	95	1e-05	7479	1433
0448206f-3ade-4087-b1a9-4fb2d14e1367	BR	197277	35	0.0002	A/T;23|AC/GT;4|AT;2|CA/TG;2|TA;2|C/G;1|GA/TC;1	A/T;0.6571|AC/GT;0.1143|AT;0.0571|CA/TG;0.0571|TA;0.0571|C/G;0.0286|GA/TC;0.0286	2c11d82e-be99-4226-b1a2-690759807fff/PCAWG.6efc9350-f8a4-4c38-a60a-8e21fbe4d30c.bam	7d6f7908-c56b-4715-94d4-b5fb15c480a1/PCAWG.3a171f98-25de-4210-8c43-08b76ad3d692.bam	7624111	79	1e-05	21791	2679
74b57d2c-a83f-4798-b86b-a533975e4cc0	BR	197996	238	0.0012	A/T;231|GA/TC;3|AT;1|AC/GT;1|CA/TG;1|C/G;1	A/T;0.9706|GA/TC;0.0126|AT;0.0042|AC/GT;0.0042|CA/TG;0.0042|C/G;0.0042	696c6894-90f5-486d-b01b-34c90af47a57/PCAWG.8e314d61-376b-4d8c-9c9d-8561b2fddfb1.bam	efd94c57-0248-433a-99cf-f2a68d16e0af/PCAWG.85249aad-7e95-469a-bbe1-24b665040441.bam	7639016	348	5e-05	10070	1815
6e839eaf-1dbb-43f5-8846-c980e05540c7	BR	194055	133	0.0007	A/T;101|CA/TG;8|AC/GT;7|C/G;7|AG/CT;5|AT;2|GA/TC;2|TA;1	A/T;0.7594|CA/TG;0.0602|AC/GT;0.0526|C/G;0.0526|AG/CT;0.0376|AT;0.015|GA/TC;0.015|TA;0.0075	3d397465-efc6-4a90-b7f5-bf5e0d5d6349/PCAWG.003a4eb9-c647-4a9f-aebb-b29dff6d5645.bam	f4d85e15-0de6-46b7-98d3-db3485f0e6b2/PCAWG.89eaae39-e648-4e4e-b170-717609baa18e.bam	7563009	199	3e-05	14998	2936
7cdbe0e8-f614-4f54-b864-fd6b39e8ef1c	BR	196744	41	0.0002	A/T;28|CA/TG;4|AC/GT;3|C/G;3|TA;2|AT;1	A/T;0.6829|CA/TG;0.0976|AC/GT;0.0732|C/G;0.0732|TA;0.0488|AT;0.0244	13bdb30f-7c7d-4129-ac2c-027bd25aba18/PCAWG.26a0f7a0-4361-4886-9260-0d142b76129e.bam	4b0d2118-951e-423c-8730-ba56a0bfa1dc/PCAWG.86778b7c-298d-491b-9296-34ad2973f53d.bam	7603698	57	1e-05	19344	1395
2da2b745-068d-408c-9163-3b3a78d4aaed	BR	195752	34	0.0002	A/T;23|CA/TG;5|AC/GT;3|AT;1|C/G;1|TA;1	A/T;0.6765|CA/TG;0.1471|AC/GT;0.0882|AT;0.0294|C/G;0.0294|TA;0.0294	e1478051-01b3-4d1b-9287-831c61c996c6/PCAWG.bac6cc92-1965-4b1f-93f5-868fe97b6e18.bam	0271b532-e961-49de-8f0b-ec6f3177af40/PCAWG.f4b566dc-ebec-4681-b427-b36b8c227378.bam	7590161	46	1e-05	2901	1119
3585e133-b3c1-4d90-b5f2-2b867e0ae0ec	BR	197151	79	0.0004	A/T;61|AC/GT;8|CA/TG;5|GA/TC;3|AT;1|AG/CT;1	A/T;0.7722|AC/GT;0.1013|CA/TG;0.0633|GA/TC;0.038|AT;0.0127|AG/CT;0.0127	0ab920b9-5375-43ca-bb2f-f33d3c46ca14/PCAWG.5a44dfa6-58b1-40db-b37f-fa8f16c97c94.bam	9f4d6035-e1b9-431b-a6e4-91a0bde15dfe/PCAWG.43fabc8a-85f6-424b-95ae-a622ef6c1c15.bam	7620857	134	2e-05	10931	2405
1c0e384f-7254-4afe-93c0-b3fc6c6a7894	BR	186774	223	0.0012	A/T;207|AC/GT;4|AT;3|C/G;3|CA/TG;2|GA/TC;2|TA;2	A/T;0.9283|AC/GT;0.0179|AT;0.0135|C/G;0.0135|CA/TG;0.009|GA/TC;0.009|TA;0.009	7b0d36d0-89da-4e67-b8f7-dd71fc66165f/PCAWG.c35f6994-5e39-4905-bba2-d00d89ad0d0c.bam	4bbb33a4-26ef-4488-abf1-90f295241b71/PCAWG.58ce7cc4-e64c-43f5-b4f9-c12677f4f106.bam	7390048	342	5e-05	29548	2504
e7dc7492-3a84-49c7-8dea-8f508b53dc40	BR	197333	70	0.0004	A/T;55|CA/TG;5|AG/CT;3|AC/GT;2|GA/TC;2|AT;1|C/G;1|TA;1	A/T;0.7857|CA/TG;0.0714|AG/CT;0.0429|AC/GT;0.0286|GA/TC;0.0286|AT;0.0143|C/G;0.0143|TA;0.0143	4903f8c4-3871-40db-acd4-4709c0a813f7/PCAWG.d36cd7cd-08de-4106-964f-dda6b23bac30.bam	653aff4d-cea8-4462-b359-cbbbc6324603/PCAWG.81503ba7-fd40-45ea-9e77-9bd0275efad7.bam	7624143	110	1e-05	3801	1442
9c70688d-6e43-4520-9262-eaae4e4d597d	BR	198012	41	0.0002	A/T;31|C/G;4|AC/GT;2|CA/TG;2|AT;1|TA;1	A/T;0.7561|C/G;0.0976|AC/GT;0.0488|CA/TG;0.0488|AT;0.0244|TA;0.0244	0b20bd57-16a2-48ce-be7d-4fc3775931e5/PCAWG.c0f8b6f4-32f6-486d-8a12-a666b9af1103.bam	7a8e78b1-6a82-4899-ac9d-0e182b45f63c/PCAWG.5f5460e6-84e1-40a1-b96a-d8b8f378d280.bam	7641556	78	1e-05	5067	1002
T27	BI	198574	14	0.0001	A/T;12|AT;1|GA/TC;1	A/T;0.8571|AT;0.0714|GA/TC;0.0714	7bda19f2-1fab-47be-bd2a-36197b81d327/91b4aa58291e9c113145d4a74db61fd5.bam	28a0f3a0-33be-4238-8a30-7f2003287506/7d0b17313f8a058ac97d9e0aec277928.bam	7649834	23	0	5330	705
TA035	BI	197876	263	0.0013	A/T;253|CA/TG;5|C/G;3|AT;1|AAC/GTT;1	A/T;0.962|CA/TG;0.019|C/G;0.0114|AT;0.0038|AAC/GTT;0.0038	5ed7d292-55d3-4cd7-9210-6a8838da5a34/2ec6b917978ffd7545a56250b6522199.bam	bc2e0c14-a7c7-4f90-8310-534226ef482d/8f310909eaf51636057f672899a95031.bam	7632634	377	5e-05	6358	1851
TA096	BI	192566	524	0.0027	A/T;513|C/G;5|AC/GT;3|CA/TG;1|AAC/GTT;1|TA;1	A/T;0.979|C/G;0.0095|AC/GT;0.0057|CA/TG;0.0019|AAC/GTT;0.0019|TA;0.0019	c705c132-95bd-4853-96ff-bd4ee5b028d5/80ae5df80bd3e08383ed80f48e4dab58.bam	b27142c3-8765-451a-bb68-77ced083d7bb/73c4a73954614dda9be097dfb8305bd8.bam	7431216	686	9e-05	17657	3145
TA153	BI	198485	575	0.0029	A/T;546|C/G;14|AC/GT;4|CA/TG;4|AT;2|GA/TC;2|TA;2|AG/CT;1	A/T;0.9496|C/G;0.0243|AC/GT;0.007|CA/TG;0.007|AT;0.0035|GA/TC;0.0035|TA;0.0035|AG/CT;0.0017	34d42b18-1717-4720-a487-4459165c6782/3a62b4250f4c7227fd5283888f2b598e.bam	d080db6b-583b-46fe-9e2b-b70069ebe960/a51ad19bf9dcf4819371740c732bcba0.bam	7648699	877	0.00011	15180	3091
TB070	BI	198216	325	0.0016	A/T;309|C/G;8|CA/TG;4|AC/GT;2|TA;1|AG/CT;1	A/T;0.9508|C/G;0.0246|CA/TG;0.0123|AC/GT;0.0062|TA;0.0031|AG/CT;0.0031	6082c501-11c6-4078-90a8-9b0c69feba24/45960bcbf9c4b164bbcb007b780ae426.bam	08695683-9bfc-4c2f-a64e-d177c71b78c9/051ffcb4f054cb56186501f378879bd5.bam	7644128	453	6e-05	14694	2502
TB083	BI	197555	111	0.0006	A/T;103|AC/GT;3|CA/TG;3|AT;1|C/G;1	A/T;0.9279|AC/GT;0.027|CA/TG;0.027|AT;0.009|C/G;0.009	4b1a14a5-07ee-4f5a-9a7c-15c480020d64/bae038429ec4b7785bac22581f381f33.bam	cfd56615-6170-4c5c-973a-e91881328753/8c89db3631ba6755522be50a5b8e5340.bam	7615747	171	2e-05	7561	1040
TC080	BI	197857	506	0.0026	A/T;484|C/G;13|CA/TG;4|AT;2|AC/GT;1|TA;1|AG/CT;1	A/T;0.9565|C/G;0.0257|CA/TG;0.0079|AT;0.004|AC/GT;0.002|TA;0.002|AG/CT;0.002	6c85dd09-dc9e-43ff-b8f6-cde205524a41/6047b764df227f9e79bfd1b0c10e5c0c.bam	8c5fad4e-f37e-4021-b777-12b180a834e9/07a920d94cb607e6171890cef2220498.bam	7633181	732	0.0001	16421	3051
TR149	BI	198545	125	0.0006	A/T;120|AT;2|AC/GT;1|CA/TG;1|C/G;1	A/T;0.96|AT;0.016|AC/GT;0.008|CA/TG;0.008|C/G;0.008	f17da8b5-e744-4f7b-8a10-bc01c7981dc3/a6c5aadff8af7ecfb7b697fdec78091d.bam	107d3668-c7ff-4f39-a35c-9e932da50e18/74603ffb17b69f001392d4eba39eea07.bam	7649475	194	3e-05	16127	1523
TY008	BI	188327	85	0.0005	A/T;68|AT;5|AC/GT;4|CA/TG;4|C/G;2|TA;2	A/T;0.8|AT;0.0588|AC/GT;0.0471|CA/TG;0.0471|C/G;0.0235|TA;0.0235	aa511ed0-88db-4232-b024-03a625e85c3e/eb62d67453bbc1e8cf861ca19bdf7f5a.bam	e0185d1b-11c3-4168-9ae6-2b3ddcfa80a6/daeaabe3ad65b6b6b494caf2e280a79e.bam	7486238	129	2e-05	8044	2072
TY065	BI	198244	330	0.0017	A/T;317|CA/TG;4|AC/GT;3|C/G;3|AT;1|TA;1|AG/CT;1	A/T;0.9606|CA/TG;0.0121|AC/GT;0.0091|C/G;0.0091|AT;0.003|TA;0.003|AG/CT;0.003	8521968f-1cda-4333-993d-22e146f02938/49f6d0817c3e066a79031b6e75f3de1f.bam	4be2df67-502e-45d9-83c2-87e5287ed19a/2fb481d77b703b886e8d8b8daa86691d.bam	7637997	472	6e-05	11848	1942
TY140	BI	188540	273	0.0014	A/T;254|C/G;9|AT;2|AC/GT;2|CA/TG;2|TA;2|GA/TC;1|AG/CT;1	A/T;0.9304|C/G;0.033|AT;0.0073|AC/GT;0.0073|CA/TG;0.0073|TA;0.0073|GA/TC;0.0037|AG/CT;0.0037	77fc5205-606d-45c1-8ea2-9bf36b1596fd/45ee17dec214135d0dcfd2aafc75534e.bam	3481e852-6f62-4195-863c-a1b35add0922/bf257295d462336f4e47c2e4f8eabee2.bam	7313568	386	5e-05	15345	2003
TZ2403	BI	189954	74	0.0004	A/T;68|AC/GT;3|CA/TG;1|C/G;1|TA;1	A/T;0.9189|AC/GT;0.0405|CA/TG;0.0135|C/G;0.0135|TA;0.0135	dd034345-36f9-4660-b647-a8a25f2d485b/a0558c590b729c1c04f9aa6e75b09eae.bam	5f6a6aeb-1578-4b7e-bc79-8241f612b8b8/aff87d81ad845907d46f5b7126c09cc9.bam	7411083	133	2e-05	13141	1116
3269608c-5dd7-452a-976a-31ac971aac2f	CE	193333	184	0.001	A/T;171|AT;4|CA/TG;3|AC/GT;2|C/G;2|GA/TC;1|TA;1	A/T;0.9293|AT;0.0217|CA/TG;0.0163|AC/GT;0.0109|C/G;0.0109|GA/TC;0.0054|TA;0.0054	9a106f03-caed-42b5-94dc-c7cc4a5550bd/PCAWG.45a1d49f-b5ee-4e9b-96a8-0c134ebfac6c.bam	2e2b63f1-b38f-4801-ae9e-93e1262e921f/PCAWG.ed062bdb-9c6b-4845-ad42-1736f1f66853.bam	7556921	273	4e-05	10634	2171
b3b3a27c-ee9a-42af-a6d1-9af5970a98b9	CE	197560	86	0.0004	A/T;75|AC/GT;4|C/G;3|CA/TG;2|GA/TC;2	A/T;0.8721|AC/GT;0.0465|C/G;0.0349|CA/TG;0.0233|GA/TC;0.0233	1e8faf9d-5754-4c99-a099-7d16c68a64ad/PCAWG.3b2c5881-e2a9-4ae9-9abd-bafec7c045f1.bam	4eda8fde-9820-4062-9706-45886bdf548c/PCAWG.0b2484f8-2bc8-474b-830a-42c68c78c881.bam	7633777	117	2e-05	5148	1231
07d20658-3db4-47e7-877b-66536266edfc	CE	187471	89	0.0005	A/T;78|AG/CT;4|AC/GT;3|GA/TC;2|CA/TG;1|C/G;1	A/T;0.8764|AG/CT;0.0449|AC/GT;0.0337|GA/TC;0.0225|CA/TG;0.0112|C/G;0.0112	646684e5-190a-4d0c-9620-85e6aa45b14b/PCAWG.a8558d63-00d8-425a-931c-e630c87f933d.bam	4957d416-f640-41af-8952-19e716b5e5ae/PCAWG.a589e544-78fc-48f5-9faa-bf32e2377e7a.bam	7424308	137	2e-05	8023	1644
945e6808-2887-4f32-ac32-8f9e00353bf6	CE	194022	93	0.0005	A/T;84|TA;3|AC/GT;2|CA/TG;2|C/G;2	A/T;0.9032|TA;0.0323|AC/GT;0.0215|CA/TG;0.0215|C/G;0.0215	bd829214-f230-4331-b234-def10bbe7938/PCAWG.ba8bb154-ef77-4383-99b5-0abc5034aaeb.bam	e144c843-5043-4fb7-ab39-128ca91ffe92/PCAWG.abd8a814-8c7d-4b4a-b4a7-38394a36ac30.bam	7577813	127	2e-05	5119	1850
7dc3e035-c7ae-4164-a62b-9c2460812b05	CE	197520	97	0.0005	A/T;74|CA/TG;9|AC/GT;7|GA/TC;2|TA;2|AG/CT;2|C/G;1	A/T;0.7629|CA/TG;0.0928|AC/GT;0.0722|GA/TC;0.0206|TA;0.0206|AG/CT;0.0206|C/G;0.0103	5f5efa57-47bb-4910-bff7-a60ab3b23cc2/PCAWG.776a0e15-e4b1-403b-83c2-6a7fde0cca1a.bam	c4f3aab0-4edc-47fb-88de-ba4efecfa86c/PCAWG.17fec9ba-8a61-4cd2-8f6f-664de8fef5f3.bam	7633512	145	2e-05	8097	1654
f658c350-fb89-4268-8a59-a07e365f4221	CE	196019	94	0.0005	A/T;72|AC/GT;10|CA/TG;5|GA/TC;3|AT;1|C/G;1|TA;1|AG/CT;1	A/T;0.766|AC/GT;0.1064|CA/TG;0.0532|GA/TC;0.0319|AT;0.0106|C/G;0.0106|TA;0.0106|AG/CT;0.0106	51d5a4de-1b1b-4dbf-a5ca-d0a34aa31391/PCAWG.9630d28c-cf1a-4547-86bf-ddcdb43a01f2.bam	1f4f6e4c-793a-4f47-b302-2a7cf383b588/PCAWG.62ad0026-3177-4be3-9cc0-5da2624d3866.bam	7602004	135	2e-05	8201	1472
842df341-d34f-4ed6-928c-eaf15bf7f667	CE	180022	147	0.0008	A/T;122|AC/GT;7|CA/TG;7|AT;4|C/G;2|TA;2|AG/CT;2|GA/TC;1	A/T;0.8299|AC/GT;0.0476|CA/TG;0.0476|AT;0.0272|C/G;0.0136|TA;0.0136|AG/CT;0.0136|GA/TC;0.0068	36835853-10eb-44a2-b3d8-57066222b3e1/PCAWG.8ccbd7dd-63b4-49a3-a7d4-6dcae0b522f4.bam	e11a67d2-8bc4-4ee1-a038-b34d9b456bc3/PCAWG.51265f7f-31de-4c0d-a28a-2e44c21b0f25.bam	7183493	206	3e-05	4623	1978
43be43cb-a367-4a74-94e4-973acafcf576	CE	193147	89	0.0005	A/T;70|AC/GT;8|CA/TG;5|C/G;2|AG/CT;2|AT;1|TA;1	A/T;0.7865|AC/GT;0.0899|CA/TG;0.0562|C/G;0.0225|AG/CT;0.0225|AT;0.0112|TA;0.0112	1200b77a-1e83-405f-a155-94fc922f4495/PCAWG.191e2545-e4c5-4fa5-b88a-d0978f940a10.bam	abb5ec0e-029a-491e-b912-df140d9898f4/PCAWG.bc1e807d-63a0-4156-b55c-3e4bd20b0b6b.bam	7527118	134	2e-05	15083	1446
8be2b0f5-7bad-4720-b13c-e95b32bdb933	CE	196549	169	0.0009	A/T;152|AC/GT;8|CA/TG;5|C/G;3|TA;1	A/T;0.8994|AC/GT;0.0473|CA/TG;0.0296|C/G;0.0178|TA;0.0059	d2319fe8-e551-401d-8fd6-8c757ef68220/PCAWG.dc3a71b5-2cf0-403e-9ec9-2175d659ae3f.bam	5c913936-cadd-4bf4-939a-641a9d93a04e/PCAWG.e47b1945-04be-4773-a88c-001fa4131523.bam	7614051	246	3e-05	10501	1797
06dad93a-4b67-49b3-8fa5-f2546e22bae7	CE	190912	149	0.0008	A/T;135|AC/GT;4|C/G;4|CA/TG;3|AT;1|TA;1|AG/CT;1	A/T;0.906|AC/GT;0.0268|C/G;0.0268|CA/TG;0.0201|AT;0.0067|TA;0.0067|AG/CT;0.0067	c51af24c-b835-46cb-91e0-dd3d595fb313/PCAWG.4f5f4200-a556-4983-946b-62c86b06c9f7.bam	c42420da-a81c-4e82-83b1-5ca288c9a5cc/PCAWG.6e9368bc-cbc5-4b6a-b98d-2575dd311570.bam	7489571	209	3e-05	9006	1690
14b8bbf2-310b-459b-b52d-a7ef510ce1cf	CE	195831	71	0.0004	A/T;56|AC/GT;6|CA/TG;3|C/G;2|AG/CT;2|GA/TC;1|TA;1	A/T;0.7887|AC/GT;0.0845|CA/TG;0.0423|C/G;0.0282|AG/CT;0.0282|GA/TC;0.0141|TA;0.0141	782bae7a-80fa-42ff-bbc8-bdfaafe13b8f/PCAWG.2021c8d7-c227-4395-b28c-ba8de13ee27d.bam	1b367b63-7227-4b7a-8b59-5bc677bb305d/PCAWG.eeebdf26-42e4-40c5-a297-7855fdabc2d8.bam	7586513	112	1e-05	6200	1858
b9d1a64e-d445-4174-a5b4-76dd6ea69419	CE	196578	121	0.0006	A/T;98|AC/GT;8|CA/TG;8|AT;2|AG/CT;2|CATTC/GAATG;1|GA/TC;1|C/G;1	A/T;0.8099|AC/GT;0.0661|CA/TG;0.0661|AT;0.0165|AG/CT;0.0165|CATTC/GAATG;0.0083|GA/TC;0.0083|C/G;0.0083	130ce948-5142-4207-9342-60f2b54fa524/PCAWG.df2657f0-92fd-4a7f-92c5-994453b5a52b.bam	9af1c15c-5d9c-4174-bb94-f0f9270f3c34/PCAWG.c64f354a-28c8-4e92-b5e3-62e1bfaabe25.bam	7606616	160	2e-05	6551	1364
801e67c8-c506-410a-bdf0-856a66e974f4	CE	195756	129	0.0007	A/T;113|AC/GT;6|CA/TG;5|C/G;4|AT;1	A/T;0.876|AC/GT;0.0465|CA/TG;0.0388|C/G;0.031|AT;0.0078	0ecffc65-eed8-4847-9889-9ed9e1b5667e/PCAWG.8332408a-739b-43aa-bb4a-1bc8424c512b.bam	6cdb1f81-f7aa-421a-87d4-132df2232a01/PCAWG.165716fb-87f9-47d8-a214-7ad75db6a5e7.bam	7596309	188	2e-05	10486	1941
e07991a4-0901-4ed1-8704-aa376565d862	CE	197278	83	0.0004	A/T;72|C/G;4|AC/GT;3|CA/TG;2|TA;1|AG/CT;1	A/T;0.8675|C/G;0.0482|AC/GT;0.0361|CA/TG;0.0241|TA;0.012|AG/CT;0.012	d5bc4803-a4ff-4bd5-b5ad-d5fc98526c5c/PCAWG.a48bb14a-923e-4fe5-8d4d-3e58e32d3d60.bam	b8703a6c-21fa-44b5-a80f-b209a4a17847/PCAWG.e8779d0f-382d-49f4-84ff-c408db543c9e.bam	7628078	109	1e-05	8762	1248
047f9e4d-86b5-4943-aef5-68199bf29e8c	CE	193871	127	0.0007	A/T;113|AC/GT;5|CA/TG;2|GA/TC;2|C/G;2|AT;1|TA;1|AG/CT;1	A/T;0.8898|AC/GT;0.0394|CA/TG;0.0157|GA/TC;0.0157|C/G;0.0157|AT;0.0079|TA;0.0079|AG/CT;0.0079	13be8d9c-8425-4627-ad5a-714040f36213/PCAWG.032fdab7-fae5-4396-9afe-cbe56eff51c2.bam	73a77f50-bbe5-491c-8dba-a5bcdf22e53b/PCAWG.9d614cec-d41d-4d5b-b6b2-bd2d61db3f50.bam	7529382	184	2e-05	11769	1510
a67f4531-99ef-43df-82f5-f6abc4b11826	CE	167343	70	0.0004	A/T;49|CA/TG;11|AC/GT;5|AT;1|GA/TC;1|C/G;1|TA;1|AG/CT;1	A/T;0.7|CA/TG;0.1571|AC/GT;0.0714|AT;0.0143|GA/TC;0.0143|C/G;0.0143|TA;0.0143|AG/CT;0.0143	b029d86a-0d67-44c1-a11c-7f48fb159a16/PCAWG.7aee507b-2c9c-40db-938c-abfd6a7ed593.bam	318d6398-2c40-4dd4-9c1a-30e0d08f98d6/PCAWG.56f5f78b-e049-4d3f-bfae-705357ad26d6.bam	6780700	101	1e-05	4441	1579
0f6b355e-3898-4be6-be97-da0c3840a4ed	CE	198100	143	0.0007	A/T;132|CA/TG;4|AC/GT;3|AT;2|AG/CT;2	A/T;0.9231|CA/TG;0.028|AC/GT;0.021|AT;0.014|AG/CT;0.014	a65a03b5-ba76-47fe-b2da-982cd568e630/PCAWG.4fba127f-f12b-4301-b62a-8a75296ee2a5.bam	7ea77a31-cfaa-4149-8dad-9b45437a4692/PCAWG.50a5e434-881a-4377-9210-0f614ca8dfbb.bam	7642053	186	2e-05	4902	1532
001-0002-11TD	LY	197727	27	0.0001	A/T;26|C/G;1	A/T;0.963|C/G;0.037	bb06f0c5-baf4-4a39-9fee-d5f904859552/3a27910d544adbeab95b2b73c20ab6e5.bam	c78f1fba-a72f-4dd2-8181-2527cf3caab5/474e3b36be9aba5e893234f2d4891e6e.bam	7619954	37	0	4010	608
010-0028-02TD	LY	184539	30	0.0002	A/T;29|AC/GT;1	A/T;0.9667|AC/GT;0.0333	90289501-5e65-44d4-aa44-7888c8fb3307/d0941db02c848af1830db881425b2692.bam	3f47821d-e80b-4fb5-8dbf-766e0e724f69/8e70c20b48d7ebd1de53ea769429edec.bam	7388564	44	1e-05	3252	563
115-1917-01TD	LY	183275	71	0.0004	A/T;68|AT;1|GA/TC;1|TA;1	A/T;0.9577|AT;0.0141|GA/TC;0.0141|TA;0.0141	19bea10a-441b-43a0-80e1-c7f690e1333c/328962a7928000afc72908d1bb678a44.bam	ee2c6b9a-6ac6-4e5f-a114-d936c9b9a047/e7cf3d7837e1be92a4be335629152069.bam	7325460	87	1e-05	3880	774
122-06-01TD	LY	196837	65	0.0003	A/T;63|AT;1|C/G;1	A/T;0.9692|AT;0.0154|C/G;0.0154	ba5a2940-f3f3-4eb6-8e88-5e6753cab6be/807eddf14513a3904166eaad16e97ce2.bam	178b8059-ba1b-4048-bd46-8a159fc14772/d3d5d25cd8e28963ae303c207f448aac.bam	7623336	97	1e-05	4680	758
125-01-1TD	LY	198193	61	0.0003	A/T;59|CA/TG;1|TA;1	A/T;0.9672|CA/TG;0.0164|TA;0.0164	dc042aac-678e-4243-a027-14005144d8bc/a354f06bdfdb4213b0001e2b5c7b6ec4.bam	3be2cacb-69e8-49f6-9536-21d72593b3ea/72e31dc9b7e7833b23833b80400a4345.bam	7642861	76	1e-05	3299	672
128-03-2TD	LY	181843	25	0.0001	A/T;20|C/G;2|CA/TG;1|TA;1|AG/CT;1	A/T;0.8|C/G;0.08|CA/TG;0.04|TA;0.04|AG/CT;0.04	05a48ecf-8439-48d7-aeb7-5fd6f68b20de/5e568425c7feabaf7128e0cc228add19.bam	3ef56c07-55f1-4eb2-b290-8d1dd5f9176b/6879c3b27b4377f61326fb2683b75e2b.bam	6915104	38	1e-05	2867	672
134-08-01TD	LY	196312	22	0.0001	A/T;22	A/T;1	9f96b61f-cc42-45da-9d88-512c6941341e/d59e4ab3194706051bcaebba95da14a4.bam	15726052-f37d-47ad-8e17-638a1bcfd934/235e2ef9355709d471c5526d65bab485.bam	7611553	30	0	2955	391
137-03-3TD	LY	192726	68	0.0004	A/T;67|AT;1	A/T;0.9853|AT;0.0147	2c02a61f-4b70-4ce3-a6ae-48cf430a1306/435e0af9fb0092a4121fa922db44419b.bam	7e67212f-aadb-4a34-9f85-225c9612e404/7a99bb623fbe3fb791ec8fac749087a5.bam	7519976	87	1e-05	2710	652
138-03-2TD	LY	187991	31	0.0002	A/T;26|C/G;4|CA/TG;1	A/T;0.8387|C/G;0.129|CA/TG;0.0323	76aa7c41-b7da-40f5-b45b-df76fa8be8ec/13aefe6c1515b0e5c3ceca96e8dd1d29.bam	4e07924c-7e68-43db-99d0-0e4f877a508c/611ee8122f7d49a9e60304f0b57acc4b.bam	7439045	42	1e-05	3463	638
139-05-01TD	LY	186201	24	0.0001	A/T;24	A/T;1	57a61afa-e041-4032-bc5e-32bc5d9710c5/233c567550eb81f8edcfa2ee0a7c40ab.bam	10bddfd4-b90e-4577-819d-78ef68c4a330/2d2b358bad55d71a980a0cfb78729577.bam	7412600	35	0	2219	491
141-02-3TD	LY	193310	13	0.0001	A/T;13	A/T;1	4eabdc95-6a0a-42ea-a448-66b28f0e6ac4/9db7a6d3e1066a2c6c1ff9da8dc92562.bam	faeee16d-29c4-43b2-9093-fe35c4b143d7/3436edecaae5536e2d8ae581868d05a6.bam	7532666	25	0	5348	592
145-01-1TD	LY	187825	19	0.0001	A/T;19	A/T;1	8ca0cdf8-6fe3-410a-a548-e0a0e43f3f60/3d92f08d61f820dc2e22d2107d6b8077.bam	29c62429-298a-4da4-9a49-dfa24349d439/cebca9fe761046ed57b5c6565e240621.bam	7424110	26	0	2762	414
148-02-3TD	LY	191198	9	0	A/T;9	A/T;1	32873a8e-842a-4e94-ad08-e19e68de4c26/c86a8f378962228823094ef84aa3f266.bam	736d6208-03c3-4fd3-9f6e-84e34e52fd50/26b8eff48c96dbcbe7402fb84239683c.bam	7510755	18	0	1855	350
015-0038-01TD	LY	151384	39	0.0003	A/T;32|CA/TG;4|C/G;2|AAC/GTT;1	A/T;0.8205|CA/TG;0.1026|C/G;0.0513|AAC/GTT;0.0256	1029f4ae-aca2-4695-a2bd-4baa56290c44/5e789c96ec058a795055e382235515fd.bam	86782056-f7b5-4bf0-873f-7ce1577b407b/2b8043b81b835b4812dee9a51d63fc53.bam	6410917	53	1e-05	2517	666
151-02-8TD	LY	196273	100	0.0005	A/T;98|C/G;1|TA;1	A/T;0.98|C/G;0.01|TA;0.01	8bc45852-b636-46b5-bcbe-dec248e02c1f/40efcb304190604b5e1240910314b1e9.bam	9e86cf26-ab1d-4949-af9e-657e3d43f24e/de3ec1f1e4d5795a38fd4c70dbb56379.bam	7603212	124	2e-05	4177	690
157-01-1TD	LY	181854	14	0.0001	A/T;12|CA/TG;2	A/T;0.8571|CA/TG;0.1429	1df6fd29-3eb2-44d4-954f-cf1f9109a746/e6cdf28912d360a2b947f5911c79e214.bam	be91fb29-2369-4b48-862e-731831280541/9ee76dddd4e8194f4ed004397c494766.bam	7319800	26	0	2874	524
016-0040-02TD	LY	177014	50	0.0003	A/T;47|AC/GT;1|CA/TG;1|C/G;1	A/T;0.94|AC/GT;0.02|CA/TG;0.02|C/G;0.02	8dc37e63-d1a4-45a7-be54-51a5fcf24a3f/d2a7835acaf152e982e2868749e218d8.bam	7670b801-c503-4aa2-9520-ab52ebb93028/ef67ce17a671edebea55ca9a6a6943fe.bam	6970438	73	1e-05	4113	783
166-07-01TD	LY	187958	19	0.0001	A/T;17|AC/GT;1|GA/TC;1	A/T;0.8947|AC/GT;0.0526|GA/TC;0.0526	7d654e2c-d1bd-4b8a-b341-f86803a1db76/df63f1e68d8445284a558a406520c1d3.bam	c1f04221-7b2b-47fb-a8a1-f8557d006e70/1f92f521a2d46e2ff675350a8604a334.bam	7437251	29	0	2018	501
176-06-01TD	LY	198352	4	0	A/T;4	A/T;1	60d91847-ebb6-4af9-be17-607b90c4016d/05b8bda0122c9ac7b1ce5d91ac77eb61.bam	89d8a2e2-c1cf-4e63-a309-9c8bf2b24425/13d9731f9173ba048054c2e47854100c.bam	7645896	7	0	2594	523
177-01-9TD	LY	191215	23	0.0001	A/T;22|C/G;1	A/T;0.9565|C/G;0.0435	a3b68880-704b-4b94-94e5-0fb24f5b98c8/286146fefe7173e529b16ffd7e32cea4.bam	05c021a7-4809-4685-a574-816a5de74e07/2b35c74d475d3d5a7f4d8d2f32f5ff6d.bam	7488868	32	0	3572	494
179-10-01TD	LY	185888	60	0.0003	A/T;59|AAAC/GTTT;1	A/T;0.9833|AAAC/GTTT;0.0167	3f478bec-0827-458b-aad6-441595e1f6fa/3f05a22f9065c36db2c80e8b0b883f39.bam	8dffb69d-efdf-4db0-9082-8cea83194019/40249ac3952a8b2cdd30b12f8562f2b2.bam	7431618	85	1e-05	3653	640
181-01-3TD	LY	183346	66	0.0004	A/T;58|AC/GT;3|C/G;3|CA/TG;1|GA/TC;1	A/T;0.8788|AC/GT;0.0455|C/G;0.0455|CA/TG;0.0152|GA/TC;0.0152	3bc279f9-e2c6-4dcd-adc1-f7b11b48d0da/98e02cbe371fd39aebcc4d562b58e83c.bam	a60dc488-13dd-403e-9b8c-85a9fc497cd7/643f897cc68d42e2620b485d48fc7747.bam	7239192	102	1e-05	4285	946
188-01-2TD	LY	186027	14	0.0001	A/T;12|AC/GT;1|TA;1	A/T;0.8571|AC/GT;0.0714|TA;0.0714	30935607-0ee3-4319-8933-30d4b8e133e9/c81951a6467ed15645224f6c348f56fb.bam	d97abb15-9f3e-4cd3-a2e7-b8c7f6cd43be/4902a72f18be4ca7f294e2adee4894f8.bam	7397164	27	0	2845	452
192-01-4TD	LY	171964	72	0.0004	A/T;65|AC/GT;3|AT;2|CA/TG;1|TA;1	A/T;0.9028|AC/GT;0.0417|AT;0.0278|CA/TG;0.0139|TA;0.0139	16b167c8-7aa6-45be-bd33-09f6160d84ba/ce762a6f9616c7fed90d34e322fe32be.bam	5185649f-dd8e-4118-a67f-f506f63f00f7/2cd3a7e6cfdbbf5ad218e381fae89bbe.bam	6551428	104	2e-05	4230	1129
199-06-01TD	LY	188844	74	0.0004	A/T;72|CA/TG;1|C/G;1	A/T;0.973|CA/TG;0.0135|C/G;0.0135	232c3115-fe7d-4021-b017-a3c2aea4cec4/e71d0ef510723bb63be40e8a8d2cfb10.bam	0c6c7120-5588-461f-99a1-3b0c7bfdb145/21b3a9671a5df169f0a834a6606af786.bam	7478170	109	1e-05	4288	856
002-0010-10TD	LY	194066	23	0.0001	A/T;23	A/T;1	1b1343fb-c335-4f24-bc95-cdd1e0986f8c/e10b83934068378fb431a2299343ecb2.bam	38ec0e1c-63ac-4378-a148-93f2e3c819aa/5cc0ab1518e2f4a06fe452a86f286bbb.bam	7454033	35	0	5215	974
020-0049-01TD	LY	184422	18	0.0001	A/T;16|CA/TG;1|AATGG/CCATT;1	A/T;0.8889|CA/TG;0.0556|AATGG/CCATT;0.0556	8d751d8b-7e54-4d83-ab00-2af988946298/70699a2d64d5a07533dfed491ec52fda.bam	04019035-4fe9-4609-8860-d872544f1204/e0d82d01a0550f72ecffd4fb5579116f.bam	7382116	34	0	3174	479
023-0056-01TD	LY	184394	16	0.0001	A/T;15|GA/TC;1	A/T;0.9375|GA/TC;0.0625	6a746c00-7e0b-49b0-bd77-2f13eab69ff4/dd3a67b918687fea0612a2147b213856.bam	977c2605-9f19-4180-a10a-a1631bde0292/202c073461fbdfd27490df32861f69b8.bam	7356018	25	0	2371	409
244-05-1TD	LY	172756	81	0.0005	A/T;71|AC/GT;3|AT;2|CA/TG;2|TA;2|C/G;1	A/T;0.8765|AC/GT;0.037|AT;0.0247|CA/TG;0.0247|TA;0.0247|C/G;0.0123	fcc09ef6-5886-4c7a-912e-08768e15594d/7b2e875238a1b9074b9a0e021fc3594e.bam	4c8e36f4-f37c-4e1f-9007-8385d7aa3d9c/c618837c8b9de9c6474986eda6bcc695.bam	6854641	107	2e-05	4113	928
025-0059-01TD	LY	165406	27	0.0002	A/T;18|CA/TG;4|AC/GT;3|AT;2	A/T;0.6667|CA/TG;0.1481|AC/GT;0.1111|AT;0.0741	45675611-e06e-4f4d-ad00-1e987eed0972/79cc9b62f6fb3a5fa0105389673c2069.bam	cd944848-961c-4cda-b726-fbd526638af7/4ffb6cf32133a3ab91b276cb3deda300.bam	6713510	33	0	1438	1410
026-0061-01TD	LY	169503	19	0.0001	A/T;15|CA/TG;2|AT;1|AC/GT;1	A/T;0.7895|CA/TG;0.1053|AT;0.0526|AC/GT;0.0526	fec189a7-03b3-455d-87ff-e59b2fee4f95/a001076be17d60cc44b92ff8d8281af3.bam	c6ce990f-9f5f-4167-b8ca-5a754dd3c2bd/d30e57f0b4f080f70bfb2b2c1f3b4f25.bam	6811287	34	0	2413	638
027-0063-01TD	LY	189413	10	0.0001	A/T;9|CA/TG;1	A/T;0.9|CA/TG;0.1	b969a593-4bd5-457f-ae76-726109b4c16c/b1c5239cad2473b6490b3b31a5d8e6c6.bam	0e426c49-f6d3-4cd6-a4d1-55e7a0b119f0/1ba15a4b1668856e7a78ca3531c5c0b2.bam	7485914	17	0	1647	351
277-01-3TD	LY	192480	8	0	A/T;4|C/G;2|CA/TG;1|TA;1	A/T;0.5|C/G;0.25|CA/TG;0.125|TA;0.125	71096b75-f06d-41ea-9279-c3ffa7538d7f/b5acd0c713fd7d149521726cd2341dc2.bam	c88008c9-fa2e-4a04-948b-b5af68d3b4fd/639082418c0bb990109c1aad20cb9688.bam	7391775	11	0	2692	448
278-01-4TD	LY	186968	24	0.0001	A/T;22|AC/GT;1|CA/TG;1	A/T;0.9167|AC/GT;0.0417|CA/TG;0.0417	7b3c98e1-e2c2-419c-87ac-a7b074712e8b/90c44d5d89203fbaadd4a1f5c317767c.bam	c0a0f4c7-6a2a-4fcf-8634-48b61e4fcafa/9ea7499817ed5338d74b8baff96d7ab0.bam	7435894	35	0	2429	442
282-01-12TD	LY	177954	36	0.0002	A/T;30|AC/GT;2|C/G;2|AT;1|CA/TG;1	A/T;0.8333|AC/GT;0.0556|C/G;0.0556|AT;0.0278|CA/TG;0.0278	8bee0e2f-51cf-4198-b18e-fdaab1c627d8/639025853bacee0d784516bf1df7da99.bam	d4ee8bfd-c57d-4030-91f6-c5b998894fad/33d0c30ba7d31323dee390acc4bc5c9b.bam	6975917	48	1e-05	2715	691
283-06-01TD	LY	198391	13	0.0001	A/T;13	A/T;1	7d40a258-3f88-40d1-b0ac-e7419b373143/c5ec0abd57405741f30e82b97e366f06.bam	e3753831-7260-405b-9363-2936fe2e3480/ac79da3504d76dc5853645741f280047.bam	7646049	16	0	2582	633
290-1950-01TD	LY	146052	32	0.0002	A/T;28|AC/GT;3|AT;1	A/T;0.875|AC/GT;0.0938|AT;0.0313	5ddcf3e3-6198-466b-a9a4-e3b0329d348e/323196c295ce45bdd3b8e89867df917a.bam	e6d23a3a-7c51-4df3-8b24-1878f94d278d/93900dbc7d447f6b1492ba9606e319e7.bam	6263198	40	1e-05	4853	864
296-04-3TD	LY	181487	16	0.0001	A/T;14|AC/GT;1|CA/TG;1	A/T;0.875|AC/GT;0.0625|CA/TG;0.0625	bc030082-9844-4277-9d20-e2880b8d7f43/f8fda007aa38f7df3dc5abbd192bab2f.bam	a48b7579-20a3-4831-98c1-fa418fb5475b/1b3cd123e38902c80d882a8200ab9567.bam	7293865	30	0	5091	478
003-0005-10TD	LY	171510	75	0.0004	A/T;73|AT;1|C/G;1	A/T;0.9733|AT;0.0133|C/G;0.0133	e085bf06-3d73-4230-bca1-683e94fc179c/3739f3d5b95245d9c014d6e2b60a34ad.bam	c7d5561d-16d5-45db-bee6-1b9d56718d22/ee7ce7dbce0f49d2d3bab1b8dadc5bf2.bam	7022384	110	2e-05	4181	431
030-0066-01TD	LY	187833	17	0.0001	A/T;15|CA/TG;1|AG/CT;1	A/T;0.8824|CA/TG;0.0588|AG/CT;0.0588	8c05860c-2c38-4500-9073-930042a1b3f8/28f208b93b7940cce54ac4dae79a6200.bam	36f97616-310e-43ef-85b1-73d7c9095661/317a3eaa696f416ab61fd493022d9183.bam	7451465	20	0	2575	478
306-01-4TD	LY	182940	27	0.0001	A/T;19|AC/GT;3|AT;2|C/G;2|CA/TG;1	A/T;0.7037|AC/GT;0.1111|AT;0.0741|C/G;0.0741|CA/TG;0.037	eb058563-3f74-48a3-954f-6b6e676b6417/9f98537bbc18b857abd1bd66cc66c534.bam	676b76f3-2415-47ec-a807-7f6877644dff/5306093fe07ea27cd92c7d3e68b37ebc.bam	7040698	35	0	2849	879
308-01-4TD	LY	177930	79	0.0004	A/T;69|AC/GT;4|CA/TG;4|C/G;2	A/T;0.8734|AC/GT;0.0506|CA/TG;0.0506|C/G;0.0253	0d92fa94-e483-40d0-8c8b-c9374e7ca5de/eeee5a64835c9b514c7c7e7c235557a4.bam	ae9c31d2-7862-47e5-b5d4-2b161427f44e/94260a31c412b5d1e874c93b753c051e.bam	6684899	107	2e-05	3268	661
318-01-2TD	LY	185091	11	0.0001	A/T;10|C/G;1	A/T;0.9091|C/G;0.0909	876536e8-733f-4a58-985b-8330f128e627/78400186a15c2e4620fcd96d353a72f0.bam	249ab6f7-81af-418d-af54-479f5f59d215/f492db438c9f3fcc96c324cc13377062.bam	7072567	23	0	2854	654
033-0070-01TD	LY	185793	34	0.0002	A/T;30|AT;1|CA/TG;1|C/G;1|AATGG/CCATT;1	A/T;0.8824|AT;0.0294|CA/TG;0.0294|C/G;0.0294|AATGG/CCATT;0.0294	ee4f6111-7ba5-40f8-99f9-55e597e2389a/291a49874413c480aca1ee55c089a192.bam	0254c7a7-50c9-4e01-889d-c8e8ff25ee90/0be7965f7adeea69e090c9e67f499756.bam	7422262	55	1e-05	5401	558
342-01-2TD	LY	168196	97	0.0006	A/T;92|AC/GT;2|CA/TG;1|TA;1|AG/CT;1	A/T;0.9485|AC/GT;0.0206|CA/TG;0.0103|TA;0.0103|AG/CT;0.0103	63be2e32-38af-41da-bb59-a4b8c5f97833/53e976b1b14c31a2f6db8c4b85a09cff.bam	eaef0caf-8de0-4ad8-ae99-0b75af531188/5689c17daa9bd2e6200ac612fe0f488f.bam	6509589	122	2e-05	2740	945
343-03-4TD	LY	195264	64	0.0003	A/T;61|C/G;2|ATC/GAT;1	A/T;0.9531|C/G;0.0313|ATC/GAT;0.0156	601bdb27-589f-422a-90a6-23c3b98b130e/2e9b024480fdabf0a77cf569bdda5387.bam	c7ce9d11-6c37-4187-8a92-3acd2a56881d/50e24d9b24db912c4d7bb293754a234c.bam	7582574	78	1e-05	3320	524
356-01-3TD	LY	198476	10	0.0001	A/T;10	A/T;1	b602187b-e42a-4726-9f2f-618d4122d6f1/ef8cc01a7104bb0368a18db411aaecf3.bam	9dad775e-cca5-4aab-8937-5ec1e22f5f58/ce4fddf6ae935cdd9873e06d8198bfee.bam	7640619	25	0	3365	1497
358-01-2TD	LY	184928	20	0.0001	A/T;19|GA/TC;1	A/T;0.95|GA/TC;0.05	e8ca913d-5b0a-4a8e-a0c8-b536eccc1c1a/e456b08d4465500f2ede320d928162f1.bam	da59e7f1-eeac-4e2f-b293-922f1021ea8b/474bc28f7c81572c872e5d188cde4b11.bam	7381225	40	1e-05	2779	481
367-01-6TD	LY	175021	86	0.0005	A/T;81|CA/TG;3|AC/GT;1|C/G;1	A/T;0.9419|CA/TG;0.0349|AC/GT;0.0116|C/G;0.0116	61f3de20-065e-4fa8-b14d-6983d9937f6d/7a9016e66d2c2fd5a4a3334dbbd607ed.bam	6c3c7106-bf78-4ce5-bed0-601fda90b94b/07cdca1ddf84ff99909f5bc475be5ffd.bam	6826820	109	2e-05	3363	943
371-01-6TD	LY	189045	10	0.0001	A/T;8|CA/TG;1|C/G;1	A/T;0.8|CA/TG;0.1|C/G;0.1	578e6653-107a-4243-8e7d-b3705c6bf305/f3de76ca7a94af0e1abc15de31b2aa96.bam	855434fa-c1cd-4a5a-a40e-e3fe0bb58348/3bb8c3901fdff2ea548d6d4c55d7a577.bam	7252392	14	0	3295	1081
372-01-7TD	LY	155579	79	0.0005	A/T;69|C/G;4|CA/TG;3|AC/GT;2|AT;1	A/T;0.8734|C/G;0.0506|CA/TG;0.038|AC/GT;0.0253|AT;0.0127	63d59c8f-ce6b-4c49-a70d-8e977bad88d9/9a931ce47089e3f1f10787cd794a4e1d.bam	88f14833-e758-472d-94a3-6ec849ea4127/74445daafa8701b81ea1f4252cbcb37d.bam	6204895	118	2e-05	4622	1065
386-01-4TD	LY	189407	29	0.0002	A/T;29	A/T;1	bd74e369-1a24-45c8-b7da-d5e6a1f3c1e8/07bc71eafcb6ac45a7c1a99c3cadeaa9.bam	3b9f030b-6c70-438e-b618-5d1a016fd38d/39480dfb9655b28e5b0cdfdb21814c30.bam	7458687	41	1e-05	2403	550
039-0076-01TD	LY	186673	61	0.0003	A/T;57|CA/TG;2|C/G;2	A/T;0.9344|CA/TG;0.0328|C/G;0.0328	e7585c08-6f23-4bf9-b3a5-b6aae0a1f94b/df65ab1fef53817c8098df23c76c076f.bam	b9dcb336-69fd-4f00-afd7-5ed6fd2f4094/9ea02426c6bc5e7d5ff191bc5327736a.bam	7435184	76	1e-05	3762	615
393-01-6TD	LY	171316	72	0.0004	A/T;61|CA/TG;6|AC/GT;3|TA;2	A/T;0.8472|CA/TG;0.0833|AC/GT;0.0417|TA;0.0278	d68e290c-1945-4167-94f4-e8f812df6f26/8b42ee8071e3d54bf039bc8874655b9c.bam	e754eecb-c193-4f32-bdbd-dffb40c617e7/23f12b9c7d3550208034c6af5489ba24.bam	6736633	93	1e-05	2899	869
435-06-01TD	LY	188586	30	0.0002	A/T;27|C/G;2|CA/TG;1	A/T;0.9|C/G;0.0667|CA/TG;0.0333	41a5ec70-c189-4969-995a-f19a5f6c4207/04b575b4d3df234cc46ba8d6a8a15877.bam	d09baf1b-f39f-42b4-8074-068f52151444/7922b9177abdcb76b73d824ed3428bac.bam	7476486	40	1e-05	3049	467
044-0092-01TD	LY	185046	6	0	A/T;6	A/T;1	8f100133-4d12-4451-880d-43cea5db04ab/ebe1384ea583d248b1c5a4c83cbb2473.bam	9396ea43-68c6-4837-a398-264712c847d3/05426e224256c72c715f67abccc6e70b.bam	7361621	10	0	1783	378
442-02-10TD	LY	186317	11	0.0001	A/T;9|AC/GT;1|C/G;1	A/T;0.8182|AC/GT;0.0909|C/G;0.0909	422ca575-7fcc-483b-9abe-88b56aa60ace/8aff8846d3dc748288f6efc8f2cc5ae8.bam	1c650eac-6d3e-4aaa-949c-c7c72385f5b1/94299ec6f5dd88a0067105d0ff110dad.bam	7371996	21	0	2477	410
467-02-1TD	LY	196925	84	0.0004	A/T;82|C/G;2	A/T;0.9762|C/G;0.0238	c1e3c6d8-e290-4542-a9ec-0db6f6313eab/b473cb5fa858e54fbfd4d8a5ec7b1ea0.bam	17f04fef-3c5a-4f04-8ad9-d9caf06f0eca/c460fc95ac7ecec9bd33fe19f15d80f7.bam	7617372	119	2e-05	4394	803
473-02-1TD	LY	195999	77	0.0004	A/T;76|CA/TG;1	A/T;0.987|CA/TG;0.013	efe8e445-31c4-4554-9f1b-57b9c2469171/7166c4d76b08f48ab55fa180afbc571c.bam	8870d70c-f062-4cd2-bd20-bf120d36f29b/c42f3ea3cc9197ebd26a3a6f6fd92fe2.bam	7592626	98	1e-05	3623	806
477-02-8TD	LY	193655	106	0.0005	A/T;104|C/G;2	A/T;0.9811|C/G;0.0189	7e348a2e-4ee6-4885-9555-9cfd0e91895d/1152f53535780978b3de927cd8bb19b3.bam	fbd05aff-69e0-4f9e-8063-04581c10a90b/adc592f591810e0cfc9dbc83d398c026.bam	7552636	134	2e-05	4728	867
048-0089-01TD	LY	179320	32	0.0002	A/T;30|AC/GT;1|CA/TG;1	A/T;0.9375|AC/GT;0.0313|CA/TG;0.0313	6322619d-8c79-4790-a642-7f8063c33174/15f0a656b413d840b7d97e1bbc5251c7.bam	c1cb99aa-8d25-48d6-af0f-c7801d6ba9ae/e94f2447ceecb2fdc85a2a68df6c497b.bam	7238082	45	1e-05	3287	616
005-0015-01TD	LY	190571	14	0.0001	A/T;14	A/T;1	103a9037-e675-4e64-bc34-5c99c4eada40/54ccdbed83e8c460c8160c95e248eaf9.bam	c29dec41-0cf2-4565-b590-3b3715a108e7/cfa1822adeee4278a9420cd8d9f2a19a.bam	7516852	20	0	1919	367
519-02-3TD	LY	197423	31	0.0002	A/T;31	A/T;1	d4851058-4a2f-4476-9cab-ceebeeb2bb02/7e41c01ccbd278ed47f74ff2214562a3.bam	0558fae6-0e1e-443a-a1a0-bee0121c90ec/1c1e0d87f4ea811426b0ea642a9415b5.bam	7627627	39	1e-05	2938	537
523-02-5TD	LY	197144	90	0.0005	A/T;88|CA/TG;1|GA/TC;1	A/T;0.9778|CA/TG;0.0111|GA/TC;0.0111	683e7c61-9b3d-478e-bfc5-e94b3138f103/74a5779c9d1fcc084d702c66d6d71c3e.bam	88040b6b-d946-4f78-ba70-9c9089c9a117/45c66ba6c3d8e8ab672f57661c852141.bam	7618857	121	2e-05	6452	836
056-01-1TD	LY	188844	18	0.0001	A/T;16|GATA/TATC;1|C/G;1	A/T;0.8889|GATA/TATC;0.0556|C/G;0.0556	0bd32bbd-dfdf-4b65-b0ef-aaae596f850c/61583d9d4a447cc36b098eac36ef8784.bam	d89677ea-6f38-450e-85ef-b7d16d099352/cbb16e8930e3b6790bf260c54acfaffe.bam	7481006	31	0	3190	538
564-01-4TD	LY	197301	10	0.0001	A/T;10	A/T;1	cdadc073-4e00-4a49-bf70-4f7968ef1939/954c3179691377335f53b6265e235dfd.bam	48d19e13-b268-4cf6-b71c-a3fee3a2f675/02f1a45e47c6b001c9cbbb599878e5bb.bam	7622385	12	0	1959	371
577-01-4TD	LY	182058	23	0.0001	A/T;21|AC/GT;2	A/T;0.913|AC/GT;0.087	85158f85-b52c-4483-88ce-3e160d91de1a/7057c17d7aee471015516e475f36379c.bam	877b3d89-cf97-41de-b4a6-c2565ebafece/4a6de166582d57955ed1fcc177a93453.bam	7268117	35	0	2426	490
058-0121-01TD	LY	187725	28	0.0001	A/T;27|CA/TG;1	A/T;0.9643|CA/TG;0.0357	b4435dbe-3fb3-4e5c-a79b-12fec3467bdf/8334a744f52a7d965bee943fdb1879e9.bam	597c8d0d-07b6-4d30-9b22-26e42209c2c2/6dd1121463a31c3af37ec7c716f12f70.bam	7413672	35	0	2403	482
594-01-1TD	LY	194190	149	0.0008	A/T;142|CA/TG;3|C/G;3|GA/TC;1	A/T;0.953|CA/TG;0.0201|C/G;0.0201|GA/TC;0.0067	57726926-c5c6-4133-b347-d6c9272d75d2/ee36cf9233c3148385435ab55e839bb6.bam	7217b741-3a74-4fcf-acdf-532b921f0cd9/bb110e302cb9e8a70e295951c4aadd63.bam	7575215	197	3e-05	6078	1136
006-0018-01TD	LY	188091	29	0.0002	A/T;27|CA/TG;1|AG/CT;1	A/T;0.931|CA/TG;0.0345|AG/CT;0.0345	330e43d0-8cb3-4ada-8544-8ae3c1756b38/ac3befd827c4995ce7761bbe65f626d8.bam	25e66a98-38cf-46e6-a6e0-695d93fe3f5e/34fae7491e6e7c59eaa16a5a778ddea3.bam	7436402	39	1e-05	3242	606
628-05-01TD	LY	193265	76	0.0004	A/T;74|C/G;2	A/T;0.9737|C/G;0.0263	83841c51-14ee-45e0-ae46-1ea054637b39/f406dae1e536c7f0861d257696992334.bam	859b546b-0411-4d3d-954c-44129c253062/a4c64bca0e197817b9d4da684e49d1eb.bam	7564219	97	1e-05	2854	588
063-0127-01TD	LY	190300	11	0.0001	A/T;10|AC/GT;1	A/T;0.9091|AC/GT;0.0909	cf2d32e5-3c27-4701-917e-06dde2032472/fad469b773c037b4de4a9fde629f743e.bam	d6bac7e5-bb1c-4238-9fa1-06d3ad6dfce9/64f9d6cf2602a5a363e59c6a86a0d77a.bam	7497179	20	0	2156	415
064-0128-01TD	LY	189211	65	0.0003	A/T;61|AC/GT;2|C/G;2	A/T;0.9385|AC/GT;0.0308|C/G;0.0308	217bf576-9207-4264-b56b-bfdcf88a5a68/ae96809087cd906af016a595e37b18c5.bam	c7f4bd29-13c8-40ba-b1cc-a0a00dd2085f/2beaedcfd34b4dac65ec8a6b49438d83.bam	7380092	85	1e-05	5007	779
654-02-5TD	LY	178516	114	0.0006	A/T;114	A/T;1	a81f6c9e-697c-40b5-86bd-38362f5701fe/aaceef6fd91f281c8e78bbc2015b5e94.bam	80cf8df9-6142-4701-a00b-1a93fc4f57ea/c33a3a1af5fd2d6d08e3ff0eda7cdf9c.bam	7194659	138	2e-05	3803	891
661-06-01TD	LY	186655	24	0.0001	A/T;23|C/G;1	A/T;0.9583|C/G;0.0417	85131df6-36c3-43e7-b7d5-0fb756245028/2e77ea023a1c5f310be767f9fa8475f2.bam	35c123a6-2f3b-4b4b-8652-2cf33c3bdfe6/61e3b0d2442f179687f1a6f00a6e2b9f.bam	7390333	32	0	2007	484
677-07-01TD	LY	184737	32	0.0002	A/T;30|AC/GT;1|C/G;1	A/T;0.9375|AC/GT;0.0313|C/G;0.0313	9b7acb06-f032-4de9-adff-892437f3519c/bcc10c17401e365201701719bd89e308.bam	fed5fa34-50cf-4c58-87f9-8358c231ea52/aeb7b5abec3b3f8f38a6ba0085c30c94.bam	7374197	41	1e-05	2891	634
684-02-1TD	LY	188965	36	0.0002	A/T;35|GA/TC;1	A/T;0.9722|GA/TC;0.0278	a9531c18-3ae9-4cd4-ae2b-d8cfce65f877/e691d0db602fc72ff9af8a22d6e18537.bam	1f051a62-6b75-4904-a1aa-93c39bf74b21/eeda8425d22197a9916768fc5708d8b9.bam	7465030	45	1e-05	2257	476
723-03-2TD	LY	189454	26	0.0001	A/T;21|C/G;4|AG/CT;1	A/T;0.8077|C/G;0.1538|AG/CT;0.0385	fc466abe-22e0-474b-8f46-6716824d0607/ee34c8fec6e3364149a6e355e5e03079.bam	35f3dc00-b5f6-4f62-bf34-ef36d4100d19/7f102bf17790d2fc3fb13eccfa3d319c.bam	7491034	38	1e-05	3238	482
745-06-01TD	LY	184812	13	0.0001	A/T;12|C/G;1	A/T;0.9231|C/G;0.0769	8e4baefb-3b16-4ece-a5eb-47fe96e413c9/d93f829441ea6fbf39c21e7f62f4b3df.bam	413737f6-7409-4468-beb1-c4eb4c5caaa4/55a2f2736c00c5c536307ceedac54323.bam	7363274	14	0	1157	340
749-02-16TD	LY	179985	13	0.0001	A/T;9|AC/GT;2|CA/TG;2	A/T;0.6923|AC/GT;0.1538|CA/TG;0.1538	a95ba28c-6312-4316-b3fa-e4856ed5d78f/e01957480f809d743ba7fce2663917e0.bam	98b53254-2032-42bf-92a3-848a3f415d9d/96e69fe92e5137a9d073b242df5b5392.bam	6951052	19	0	1846	1427
761-01-1TD	LY	189747	10	0.0001	A/T;9|C/G;1	A/T;0.9|C/G;0.1	b357679a-7906-44fd-b4ba-7c87815a75a2/a3155d492ef4d81c093f4b8e2b833c87.bam	2582b4ef-212f-4313-8fe3-bf4bbd3b4e25/06c94389ddc5e7fde98ba31083e437a5.bam	7479906	18	0	2204	407
776-01-1TD	LY	190990	67	0.0004	A/T;67	A/T;1	4d929e7e-83e0-4e55-9357-734cb9665eb3/7c8b14011903a507cd4df287621d6f34.bam	640f7e38-cf26-4a83-8806-bdb74f4ee19b/beff43f233a2de03ee39247c319df55c.bam	7517956	79	1e-05	2894	657
783-01-11TD	LY	183386	38	0.0002	A/T;38	A/T;1	03992d10-c7ce-4d5d-903d-0b7a54315dc5/385c70bd7f783a86de416c5763a7d597.bam	60965d23-3bc2-4835-a056-63b477e1f11e/d215684148402a9d5134a12e536b5473.bam	7364914	53	1e-05	2937	557
785-1836-01TD	LY	182410	60	0.0003	A/T;54|AC/GT;2|AT;1|CA/TG;1|C/G;1|TA;1	A/T;0.9|AC/GT;0.0333|AT;0.0167|CA/TG;0.0167|C/G;0.0167|TA;0.0167	79455685-0bdd-4388-9d26-69c636bbb697/8c1ccad272d7f742f69c92cbc8f71c89.bam	4e2f0028-69aa-453d-96da-e1e6eea4d6d0/b7dc37af10afb292adc4adfde5f8139d.bam	7243832	78	1e-05	4029	712
795-01-4TD	LY	189267	32	0.0002	A/T;32	A/T;1	a9eeb5cd-fa72-4913-bb7c-531d6f90956a/6e66bdbc28e55954fb7ffc26af3c9d5a.bam	ed1e3c6d-7a16-443a-be13-7c9c67823efd/3df05f591f6c6003b8203f42a9ddfb7a.bam	7482200	46	1e-05	2965	550
802-01-11TD	LY	184497	26	0.0001	A/T;24|AC/GT;1|TA;1	A/T;0.9231|AC/GT;0.0385|TA;0.0385	de1fba3a-43e4-42b5-8696-07f82d856c77/28e2f59d7df053d535ffb12362a4a514.bam	df82ed0c-2d5c-4845-944e-1a1d98f61399/4b77606b28ea1ad0f4e903fa48ab7edd.bam	7337714	33	0	3008	482
803-01-7TD	LY	180818	18	0.0001	A/T;18	A/T;1	a2d82a01-3c48-4f64-ac35-c38b8b696452/ad566ef43955c0921a9de81c6a8a94b1.bam	b13ae0e8-1fa1-4f87-8dbe-95318cd5c7d2/b9a2a4f4932b1f1b6c47751ce9d3af2f.bam	7212910	24	0	1836	336
082-02-1TD	LY	183667	32	0.0002	A/T;30|AT;1|C/G;1	A/T;0.9375|AT;0.0313|C/G;0.0313	c2512678-77cf-4cb6-9692-6682861e09f1/9505b12cc1632f7f6c41314d9f62c2ca.bam	fff12b9d-a1ab-4ea2-b98e-52d1a5ff6248/1de3af9c18244772a9f5af256d2d9bff.bam	7331306	36	0	1879	495
824-01-1TD	LY	188196	27	0.0001	A/T;26|C/G;1	A/T;0.963|C/G;0.037	8cccc1b1-420a-4e7e-8d8b-7182f83aa9be/c80d3e2011da482a761b0d7200ec045b.bam	8418cae7-48ad-46d6-85f4-1084d2a025ea/24b5690e4e0913b372f4b706ec64c4c2.bam	7453744	37	0	3579	481
083-01-2TD	LY	190858	10	0.0001	A/T;10	A/T;1	d89fcb0f-196b-48e4-a145-b60f278c3fb0/c4c048003c7698a57923e47a70bda6dd.bam	fe3a1e68-bec9-4e77-9dfa-ec2d067e3472/ce6315b55c2c525ab3ee462d9e3f6083.bam	7500255	21	0	2010	416
832-01-3TD	LY	187250	92	0.0005	A/T;91|GA/TC;1	A/T;0.9891|GA/TC;0.0109	144ae42a-b4d8-48b2-8fbb-7c99b0badbb3/5ed001d957bc39a73a3c266733e005bd.bam	5ae124fe-50e3-4e93-88c6-3dd50bb8817a/dcf73b8addad545be5964e005ca02525.bam	7443128	125	2e-05	4073	864
084-05-01TD	LY	194435	64	0.0003	A/T;64	A/T;1	a929f928-821f-4905-96e4-4717e366180e/1c5071dbc2bfde20270bb33823e936f5.bam	eb4e37d9-7057-46f4-9b80-41b1e8130756/9e1f7da61211bd121ac61b132c992adb.bam	7576657	83	1e-05	5065	682
090-02-1TD	LY	193131	100	0.0005	A/T;98|CA/TG;1|C/G;1	A/T;0.98|CA/TG;0.01|C/G;0.01	4b628e7a-bb40-4133-851f-bb22f07db8ce/2ec2426cdebf252a46f5ebbba61a9ff1.bam	def576d2-1e2e-4940-87e2-ec2d2654cf6a/80595e5239006f076e105fb948f0414a.bam	7547766	134	2e-05	4443	846
PD4060f	MY	197943	13	0.0001	A/T;13	A/T;1	c273fd8e-f713-4671-ad20-c868c257892e/a79828259eafa5c5eb8f97a4dcd49270.bam	1988c0ea-e8f5-4ca1-8a76-ac93565f0c69/e90b9d799ff214dbfa3dadef7d74ed54.bam	7630220	17	0	3393	538
PD4060d	MY	197557	9	0	A/T;8|AT;1	A/T;0.8889|AT;0.1111	c273fd8e-f713-4671-ad20-c868c257892e/a79828259eafa5c5eb8f97a4dcd49270.bam	5cbeafff-eb05-4d91-880a-369596e79606/f61379da6db58b4c9425c1bdfd04669d.bam	7624642	9	0	3799	402
PD4060e	MY	196683	10	0.0001	A/T;10	A/T;1	c273fd8e-f713-4671-ad20-c868c257892e/a79828259eafa5c5eb8f97a4dcd49270.bam	d21b88a1-631a-4105-a51c-a6b9391ae938/078a09e421fe3c7dd445e76535f29ad1.bam	7609310	12	0	2943	422
PD4775f	MY	198485	14	0.0001	A/T;12|AC/GT;1|C/G;1	A/T;0.8571|AC/GT;0.0714|C/G;0.0714	2eefbd65-c5f1-47e3-bef5-13bce36b984f/e901613c7f72e6b848d618d13bc3354b.bam	dc1f9e37-ff3f-4ca2-8848-692d40f79ac1/15ced63c303a0206f448d67d3a302f8c.bam	7647372	15	0	2829	339
PD4775e	MY	198434	12	0.0001	A/T;11|CA/TG;1	A/T;0.9167|CA/TG;0.0833	2eefbd65-c5f1-47e3-bef5-13bce36b984f/e901613c7f72e6b848d618d13bc3354b.bam	ea7966f0-8ab1-47c8-8fca-ed8bce8e045d/423e760d96f57ab254121c8e3293eea0.bam	7645914	12	0	2146	281
PD4775c	MY	198464	11	0.0001	A/T;9|AC/GT;1|C/G;1	A/T;0.8182|AC/GT;0.0909|C/G;0.0909	2eefbd65-c5f1-47e3-bef5-13bce36b984f/e901613c7f72e6b848d618d13bc3354b.bam	4a4f9ec3-0627-4c07-a416-136a6ee9f3d4/61f01acb98f7c4254618639b224d518a.bam	7647102	12	0	2250	262
PD5006f	MY	190731	9	0	A/T;8|GA/TC;1	A/T;0.8889|GA/TC;0.1111	56dd3fd6-f9de-460f-8e50-8604303a2017/6a40a6df68474d9357bacc988ea3e30e.bam	5badafd1-cd25-4110-8dbe-14af255b5a66/7676725d9976424c98f7a92075e65554.bam	7304091	14	0	5089	1366
PD5006c	MY	190397	4	0	A/T;4	A/T;1	56dd3fd6-f9de-460f-8e50-8604303a2017/6a40a6df68474d9357bacc988ea3e30e.bam	c4e1a6c6-db74-489d-8be0-3eebc13cba2a/dd8bd66c1eb529745a55ae9fea2ddd4b.bam	7301031	5	0	3072	1086
PD5028d	MY	196778	18	0.0001	A/T;16|AC/GT;1|CA/TG;1	A/T;0.8889|AC/GT;0.0556|CA/TG;0.0556	81f64e46-fd11-40bb-ba13-4beffd48796c/6fd028f97b3b14fcf23e244de7571fcb.bam	8dbfbf02-d186-4e5c-a81e-591249dc3f51/a3f0e1cdc517ef735aaefaca5ea847df.bam	7561527	27	0	3221	419
PD5028c	MY	197027	12	0.0001	A/T;10|AC/GT;1|GA/TC;1	A/T;0.8333|AC/GT;0.0833|GA/TC;0.0833	81f64e46-fd11-40bb-ba13-4beffd48796c/6fd028f97b3b14fcf23e244de7571fcb.bam	42a0b81f-8996-4f61-8274-3dbeb1635e0b/4460792ce84247973faf9360b07fb8fa.bam	7560935	18	0	5727	646
PD5117e	MY	198170	0	0	-	-	15675560-a299-488a-9f99-8f1cb9256189/80a6e8a87163f807897faf5d7ee89ffc.bam	0aa7adab-5389-4435-a400-b68ed9dfc9fe/05dd8de5f6536ad6a29cd56fad8f97dd.bam	7642474	0	0	1975	437
PD5117d	MY	195537	1	0	A/T;1	A/T;1	15675560-a299-488a-9f99-8f1cb9256189/80a6e8a87163f807897faf5d7ee89ffc.bam	38a9fa97-cdfb-4eb9-b885-880d9893c5b7/99ab9ac4f1d1477792078c2ca5cc01e3.bam	7439161	2	0	4729	405
PD5118c	MY	197593	0	0	-	-	d34bb626-0e23-4d83-bf0f-a77a805b2e71/8e774ff961c0fc8f6a17bcb45836040d.bam	5e7962e1-a92e-42fc-b031-b929256564bc/4883826fb22d83957f81c6216339e8c8.bam	7617761	0	0	2583	564
PD5118d	MY	197755	4	0	A/T;2|AT;1|CA/TG;1	A/T;0.5|AT;0.25|CA/TG;0.25	d34bb626-0e23-4d83-bf0f-a77a805b2e71/8e774ff961c0fc8f6a17bcb45836040d.bam	7dd8f201-45a9-4ed7-9b16-2b08f983c592/787de84446fa2b341360a8a267c4f80a.bam	7621844	5	0	3833	578
PD5179c	MY	192671	6	0	A/T;6	A/T;1	bd2dc86b-08d5-48ea-9337-ec182ac074dd/3c61eb4c73a5b5710d6025bf01d25b58.bam	4b14ca1e-9b67-4ef6-af0b-3ee49351176b/5df18ba8b3de7b859c05dc19f701c67b.bam	7329624	6	0	2546	398
PD5179d	MY	196770	13	0.0001	A/T;13	A/T;1	bd2dc86b-08d5-48ea-9337-ec182ac074dd/3c61eb4c73a5b5710d6025bf01d25b58.bam	6807a8de-b768-4390-b7d5-03c62168a6dc/cd481999f9e9ab47b28bfa7cac893013.bam	7606824	15	0	2485	406
PD5179e	MY	197557	11	0.0001	A/T;11	A/T;1	bd2dc86b-08d5-48ea-9337-ec182ac074dd/3c61eb4c73a5b5710d6025bf01d25b58.bam	49557d4f-a199-4a95-8484-8356f52eef27/e4a9c07b42ee59fb5fc79cfc7db0a057.bam	7621261	14	0	3347	446
PD5181d	MY	197561	3	0	A/T;3	A/T;1	5120818e-2133-4ca7-9a9a-43af7782f69f/54bdd68a4407515b949cc2b2853a49af.bam	be045980-6980-4832-969b-fc4adaa24069/5ac018c4da2bc99ae1a57ddce06153fa.bam	7625959	5	0	3755	209
PD5181c	MY	183137	2	0	A/T;2	A/T;1	5120818e-2133-4ca7-9a9a-43af7782f69f/54bdd68a4407515b949cc2b2853a49af.bam	1a1c64f3-41ed-469c-8422-4e0b19daf9a9/7588112e521f28cdbc7543d77a00b71c.bam	7171044	5	0	4218	747
PD5637d	MY	195078	10	0.0001	A/T;10	A/T;1	4fb4b5f0-9b46-46af-ad78-9a68ef34589c/63237073df10124ad350ac62a9dc306c.bam	65009eca-fecb-4ebd-8fe1-8d570f5554cb/ab2a5f7e57bdd73c8a40fbaf2965c25f.bam	7513593	15	0	5449	757
PD5637c	MY	195780	8	0	A/T;6|CA/TG;1|GA/TC;1	A/T;0.75|CA/TG;0.125|GA/TC;0.125	4fb4b5f0-9b46-46af-ad78-9a68ef34589c/63237073df10124ad350ac62a9dc306c.bam	c2ddfc08-6ab3-4cd7-8822-0258b2ccabb0/5b9be6423aafbaed9b80b79ed589f696.bam	7568207	12	0	2316	807
PD5672c	MY	192480	17	0.0001	A/T;13|C/G;3|CA/TG;1	A/T;0.7647|C/G;0.1765|CA/TG;0.0588	de9bbec5-6faf-4d67-a3e5-fcf535d54c7b/81696ddfb02a0ec79fa08fb51f16b8a0.bam	397e5abc-5e4b-4356-bc0a-07c884eb2b8a/b062ec4e85c3bdf632c206ad68c7f86f.bam	7471831	22	0	4135	479
PD5672d	MY	195961	11	0.0001	A/T;11	A/T;1	de9bbec5-6faf-4d67-a3e5-fcf535d54c7b/81696ddfb02a0ec79fa08fb51f16b8a0.bam	d0f54a4e-3dc6-4cc3-8471-ebcc3ebfe7ea/23db73104e72fcd5428b438a4bb3969f.bam	7590462	16	0	2470	487
PD4947d	MY	170993	3	0	A/T;3	A/T;1	5b952942-a820-413d-902a-9dd2fadf49c4/702e1807071840c05e8288722dd9c9ba.bam	f3ad2f74-72da-48e8-8e79-a390ae3e6c30/4d819f3ecf7cd85ba4fadeebe6476375.bam	6573766	6	0	5518	1640
PD4947e	MY	171032	5	0	A/T;4|CA/TG;1	A/T;0.8|CA/TG;0.2	5b952942-a820-413d-902a-9dd2fadf49c4/702e1807071840c05e8288722dd9c9ba.bam	a6666791-a95e-4b94-9dec-bf8cf99bc470/87417649f5df1b83debbc363493d4226.bam	6575121	8	0	3907	193
PD4947c	MY	171153	6	0	A/T;4|CATA/TATG;1|C/G;1	A/T;0.6667|CATA/TATG;0.1667|C/G;0.1667	5b952942-a820-413d-902a-9dd2fadf49c4/702e1807071840c05e8288722dd9c9ba.bam	7d3b0786-1e51-4203-80a7-05081c5341b8/5d7fc06fd0dd742d26518190c469c9fc.bam	6577631	9	0	5736	1582
PD6577d	MY	195934	1	0	A/T;1	A/T;1	2968bdb1-dd25-4112-929d-e2eaa62f5887/200619fca3bee8f2642251de80378853.bam	0e58ce4b-92e3-442b-9dc3-830395ade3d1/409abf6cd6eeea171b8a8995530d9174.bam	7526224	1	0	2619	512
PD6577c	MY	196451	0	0	-	-	2968bdb1-dd25-4112-929d-e2eaa62f5887/200619fca3bee8f2642251de80378853.bam	a2ff6515-a87b-40db-9295-659d62ef9a9f/6d66f8bf97dba81395300707224b1c50.bam	7537184	1	0	1925	637
PD6592c	MY	196576	0	0	-	-	bc54aa18-574a-4a86-99a2-3861c5437854/f6baa36f639eacbc8300732228f4f4bb.bam	52e8d629-aa7c-41e3-9988-1201aaefb679/494d9d5d9c42c2319e7b246971895889.bam	7607912	0	0	2438	609
PD6592d	MY	195870	2	0	A/T;2	A/T;1	bc54aa18-574a-4a86-99a2-3861c5437854/f6baa36f639eacbc8300732228f4f4bb.bam	a3785ee4-d1af-487e-bc11-2cfa2494f92f/ec540e6f8828c165de51cbde045bb436.bam	7596140	2	0	3253	488
PD6607c	MY	193451	0	0	-	-	5aa5fe15-a7ea-454c-885e-51ea5ec6d2d9/1505a1e784d49bc0ee8de67354aa76cf.bam	c93b0191-7465-484b-ace2-aa05e70e307b/cb7fdfc02c2ac2e88a1a83758543b4bc.bam	7485015	1	0	2785	395
PD6607e	MY	193162	17	0.0001	A/T;16|C/G;1	A/T;0.9412|C/G;0.0588	5aa5fe15-a7ea-454c-885e-51ea5ec6d2d9/1505a1e784d49bc0ee8de67354aa76cf.bam	0411f69f-0705-487e-b098-a3b99a60bfb0/0b07e386f1e209c920baabebc09a5cc8.bam	7535936	23	0	4373	714
PD6607d	MY	190144	17	0.0001	A/T;16|C/G;1	A/T;0.9412|C/G;0.0588	5aa5fe15-a7ea-454c-885e-51ea5ec6d2d9/1505a1e784d49bc0ee8de67354aa76cf.bam	3b0378ef-e6ca-4ed7-82ec-e6c54fc4e824/8b548843b6814e8369a9ad717148accb.bam	7448470	21	0	4354	545
PD6623c	MY	194395	6	0	AC/GT;3|A/T;2|C/G;1	AC/GT;0.5|A/T;0.3333|C/G;0.1667	d529f532-07ac-4e13-bcc0-bf3fa4f5a441/6ad01fc4771bb0500a2b6b413f75da60.bam	75a7e265-ddf8-4245-bbed-57acea117e99/0271cf05ba44ca40efdbd37e477e4bc2.bam	7396010	7	0	2893	557
PD6623d	MY	191324	8	0	A/T;6|AC/GT;1|CA/TG;1	A/T;0.75|AC/GT;0.125|CA/TG;0.125	d529f532-07ac-4e13-bcc0-bf3fa4f5a441/6ad01fc4771bb0500a2b6b413f75da60.bam	bca3ac73-7e8a-4e72-801c-b0f4c9e2668f/a1c1df18619f7bfe2844c1d00743c95c.bam	7416971	10	0	3362	646
PD6635d	MY	195627	5	0	A/T;2|CATTC/GAATG;1|AT;1|AATGG/CCATT;1	A/T;0.4|CATTC/GAATG;0.2|AT;0.2|AATGG/CCATT;0.2	a333bc65-e872-4973-b878-1e8730aa40ac/9df0b7c3e11211d908371a5b838ffb26.bam	a94813f8-f83b-4493-85af-471193fe942b/8d38feb85746255cc667e05b6e14657b.bam	7522890	9	0	3792	735
PD6635c	MY	196139	7	0	A/T;5|CA/TG;1|AATGG/CCATT;1	A/T;0.7143|CA/TG;0.1429|AATGG/CCATT;0.1429	a333bc65-e872-4973-b878-1e8730aa40ac/9df0b7c3e11211d908371a5b838ffb26.bam	08165ce9-cc3d-4d52-a3fa-f53d824245b6/31b9d60ee017ce7ec7831e9146135565.bam	7581084	9	0	2622	702
PD6656e	MY	197141	2	0	A/T;2	A/T;1	d00e2051-2a4d-43f0-95dd-451b96934819/e37336db53cc3a2f22ef479ec5c9d1ff.bam	41d5c688-4034-4d8e-b2e8-0d99fddb07e8/ec92f6e0809f8bfb27e8843044d323e2.bam	7614786	3	0	2370	436
PD6656f	MY	195386	2	0	AC/GT;1|A/T;1	AC/GT;0.5|A/T;0.5	d00e2051-2a4d-43f0-95dd-451b96934819/e37336db53cc3a2f22ef479ec5c9d1ff.bam	a8bd2d9f-ff73-4fab-bd69-48898059a9ac/3f8f27de92985166cf9e83fe14e771f8.bam	7558437	4	0	3299	398
PD6661e	MY	196105	1	0	GA/TC;1	GA/TC;1	4a90a45e-c695-4cf9-97a0-8ef394f3f415/6cd0effe8994fb46265241a126281cc9.bam	b5bd0789-153b-4adf-acbb-9fbc1551a616/b1d0d9cdd2ab4d65ec86f1cc2bb12027.bam	7595163	2	0	3111	473
PD6661d2	MY	196082	2	0	GA/TC;1|AATGG/CCATT;1	GA/TC;0.5|AATGG/CCATT;0.5	4a90a45e-c695-4cf9-97a0-8ef394f3f415/6cd0effe8994fb46265241a126281cc9.bam	6a04b9aa-cde1-44dc-926b-a756c6293439/0f59a6322e7793ac0d2588b3c9355721.bam	7595437	4	0	2243	508
PD7272d	MY	195944	1	0	AATGG/CCATT;1	AATGG/CCATT;1	ed8aa9aa-8366-4761-b013-b6fe0948a76d/31ac589684b6eadd81fde6fe78a942fd.bam	0a9f8f3e-e806-4446-a6d3-a8b62da5b748/8d567437c8f656c4c619235344aaa1d7.bam	7576701	3	0	2965	508
PD7272c	MY	195149	2	0	A/T;2	A/T;1	ed8aa9aa-8366-4761-b013-b6fe0948a76d/31ac589684b6eadd81fde6fe78a942fd.bam	81bd0513-dae2-4680-a33b-e8cbd9cded28/cfc7ebfaa79f18b8ebe0e9608aab340b.bam	7564854	3	0	4150	605
PD7281c	MY	197465	6	0	A/T;4|AC/GT;1|CA/TG;1	A/T;0.6667|AC/GT;0.1667|CA/TG;0.1667	4700cc5b-0851-4c9f-bd5b-6f6692460235/e7362f06bf52811cfa28fc209fd429d8.bam	fba7f2ba-f84c-4c6b-8274-8e46ab1ba691/0ca7aeb320f80995ac28664fd5b3fa83.bam	7567808	7	0	3226	245
PD7281d	MY	198107	19	0.0001	A/T;14|C/G;2|AC/GT;1|CA/TG;1|CATC/GATG;1	A/T;0.7368|C/G;0.1053|AC/GT;0.0526|CA/TG;0.0526|CATC/GATG;0.0526	4700cc5b-0851-4c9f-bd5b-6f6692460235/e7362f06bf52811cfa28fc209fd429d8.bam	d2d033c4-f48f-4de0-bae3-a703b1c2ed8c/b0ad59f14007108a0eaeb644e30dc2aa.bam	7639402	28	0	3964	458
PD8943c	MY	196572	3	0	A/T;3	A/T;1	a7c6b7f7-1d26-4594-9a24-5eb0f35087a7/cfbac285540eb53f629b9abb60b5d12c.bam	40305c92-4eb8-4877-9d7d-921fab0025db/7cb27d6d773556aaf7f2b7938ab545c5.bam	7600882	3	0	2817	540
PD8943d	MY	196680	16	0.0001	A/T;14|CA/TG;1|C/G;1	A/T;0.875|CA/TG;0.0625|C/G;0.0625	a7c6b7f7-1d26-4594-9a24-5eb0f35087a7/cfbac285540eb53f629b9abb60b5d12c.bam	d3f06cae-c673-4b86-953d-c8105193cc9c/f54b98247780d87419024ba31926cfa8.bam	7603764	24	0	3420	622
PD9478a	MY	198398	3	0	A/T;3	A/T;1	94b221af-9a06-46b0-a193-d6778ac9cd34/0f5866b4dc59eafd14da91cc9a9ae863.bam	9752bf0e-263a-4f84-a8e2-e8db63972a58/74f6eb45200bc8b467665f769f890db7.bam	7642893	6	0	2028	342
PD9478c	MY	198383	9	0	A/T;8|C/G;1	A/T;0.8889|C/G;0.1111	94b221af-9a06-46b0-a193-d6778ac9cd34/0f5866b4dc59eafd14da91cc9a9ae863.bam	661839fb-245f-4f9c-ab5a-7d28ca8b5be8/e42ca5ce3e928344d92d3bb100fb5a14.bam	7642708	10	0	3473	393
PD9479c	MY	195486	7	0	A/T;7	A/T;1	ece3701b-1ce4-475f-909a-bf92e77d73a3/b97bb9d6e767b830717e65d82e53e7dc.bam	cd78d061-5115-4aae-bcdd-7121807c2097/7ccd0dd3c338ced3305f5235304e1f73.bam	7495762	9	0	3276	401
PD9479a	MY	197948	6	0	A/T;6	A/T;1	ece3701b-1ce4-475f-909a-bf92e77d73a3/b97bb9d6e767b830717e65d82e53e7dc.bam	b764980c-7d44-424c-91fd-c3a8cab99782/58d68f5d97934c6298fe76348b268259.bam	7625882	6	0	3015	138
PD11406c	MY	197161	7	0	A/T;6|CATC/GATG;1	A/T;0.8571|CATC/GATG;0.1429	93c0555d-62c6-4470-9098-879ea03c3e46/333edfc0c520ed7a74eefa39be4b8537.bam	d1791e66-2e9b-4fef-acc7-cdb496a0afbb/c94f26e873760bc2365676f2f9773daf.bam	7529857	13	0	4577	416
PD11406a	MY	198371	1	0	A/T;1	A/T;1	93c0555d-62c6-4470-9098-879ea03c3e46/333edfc0c520ed7a74eefa39be4b8537.bam	a8953a59-ff41-464c-971d-e7deea7430a9/22d5d10f2b60e52386715357df84e3cc.bam	7645047	1	0	1853	270
PD11407c	MY	198136	6	0	A/T;4|AC/GT;1|AT;1	A/T;0.6667|AC/GT;0.1667|AT;0.1667	6a47abc7-11f2-4df7-a105-885d740842bf/0490a71a0bec2f839848c45fa4a053e4.bam	e38a5907-5c58-4e5e-948e-c847a63ed1f4/33230789a30861c0abad68ec0a39d52a.bam	7639734	7	0	1584	539
PD11407d	MY	197248	2	0	AC/GT;1|A/T;1	AC/GT;0.5|A/T;0.5	6a47abc7-11f2-4df7-a105-885d740842bf/0490a71a0bec2f839848c45fa4a053e4.bam	1b95039c-d9d3-4497-82a8-6fa02f864060/203719f3d01d6fd8cd703589054ae87a.bam	7609340	3	0	1299	397
PD11408c	MY	197699	3	0	A/T;3	A/T;1	c5a97170-c367-4725-a608-06ff3b06b60a/75b2367efd96138cde830939f6e3fae8.bam	300c26ed-1fcf-44b7-8812-10587352eb1a/f4094a153bd35dd25f2b448bce757739.bam	7617589	3	0	2069	487
PD11408a	MY	198256	4	0	A/T;4	A/T;1	c5a97170-c367-4725-a608-06ff3b06b60a/75b2367efd96138cde830939f6e3fae8.bam	a5d051b2-176d-491f-937e-41e3505104cb/171215025ff293dc5e6814806f25d6ac.bam	7640985	5	0	2330	528
PD11409a	MY	196099	5	0	A/T;3|AC/GT;1|CA/TG;1	A/T;0.6|AC/GT;0.2|CA/TG;0.2	765459ff-26b2-4b33-86f8-5d04b9e2cac6/b2bd8ba14b3f929145cb23c1c1f2df3b.bam	74623a8f-c414-45cf-938e-6541d54333ec/9f1819dd01d7b46c09e4fa8cb8ebe015.bam	7573014	6	0	2365	150
PD11409c	MY	196281	1	0	AC/GT;1	AC/GT;1	765459ff-26b2-4b33-86f8-5d04b9e2cac6/b2bd8ba14b3f929145cb23c1c1f2df3b.bam	bbf91a42-b973-46a5-8f04-87ecd7b56440/cfefe7cdbe1e12e063956ce752679de7.bam	7577421	3	0	2064	718
PD11410a	MY	189118	12	0.0001	A/T;9|AT;2|TA;1	A/T;0.75|AT;0.1667|TA;0.0833	45507bf5-94c5-48cf-ac8a-4be740191465/f7f59f89f5696b1156af4384b76ebd60.bam	61d17c89-79ff-4555-b255-48a34b26b75e/d3fb62b29dc371d4aead5d24001cb1ab.bam	7290634	19	0	7481	811
PD11410a2	MY	172946	11	0.0001	A/T;10|AT;1	A/T;0.9091|AT;0.0909	45507bf5-94c5-48cf-ac8a-4be740191465/f7f59f89f5696b1156af4384b76ebd60.bam	b25d0ae9-7856-4565-9cca-e08e9fae56b8/4cf961ab91c339e3d2e51fbcd14d4071.bam	6745740	20	0	27783	782
PD11410c	MY	195711	2	0	A/T;2	A/T;1	45507bf5-94c5-48cf-ac8a-4be740191465/f7f59f89f5696b1156af4384b76ebd60.bam	d1fb339f-9ed9-4621-a5de-0c37a78f2c28/81b4c6512a051a8a0d6c054daa3e6be9.bam	7478915	2	0	3675	129
PD11471a	MY	198479	5	0	A/T;4|TA;1	A/T;0.8|TA;0.2	0265b24e-3799-4aca-a6e5-e53ebff163ba/774a2b0d29af0d2befd2fd0569ed63dd.bam	476f995f-c9a8-48a8-a9fc-8143af12a4aa/b53efbcedc932b77e2d6a45c523c6b95.bam	7646926	9	0	3432	171
PD11471c	MY	198446	8	0	A/T;7|TA;1	A/T;0.875|TA;0.125	0265b24e-3799-4aca-a6e5-e53ebff163ba/774a2b0d29af0d2befd2fd0569ed63dd.bam	b95f604f-3ad2-474d-92ab-6e678059b4d5/02aa911dc6b0bcae357ebcf08e1e1048.bam	7646100	12	0	3067	288
PD14393c	MY	195306	4	0	A/T;3|C/G;1	A/T;0.75|C/G;0.25	62813e0d-5f7f-4a6a-b975-839a720f948e/d67d3379494bcd4feb23c96e986d6edf.bam	ee7f2e4c-b7bc-4e03-9c12-11f388b936a9/643f15bb0c2a23056ae069972fc9eca9.bam	7554435	5	0	1583	443
PD14393d	MY	192246	2	0	A/T;2	A/T;1	62813e0d-5f7f-4a6a-b975-839a720f948e/d67d3379494bcd4feb23c96e986d6edf.bam	254130e3-0211-4618-9dae-5b38e608b717/46e3d0a7759fbd45f570bdb6beb985da.bam	7454427	4	0	1618	460
PD14394c	MY	195269	14	0.0001	A/T;13|CA/TG;1	A/T;0.9286|CA/TG;0.0714	9541edfc-f8f8-42a9-8e09-9f6083e9b6f6/2446a534be603664cccd374ee3fb7040.bam	68283743-258f-45e4-a888-ff7229cc976f/30602b940d67a7b204c1c6249a522dba.bam	7577822	19	0	2972	833
PD14394a	MY	194707	8	0	A/T;7|TA;1	A/T;0.875|TA;0.125	9541edfc-f8f8-42a9-8e09-9f6083e9b6f6/2446a534be603664cccd374ee3fb7040.bam	daaff119-43b1-4b76-a408-0ad3d5e04461/da208c83e5409ddcbb6e421bfb711d2d.bam	7566593	12	0	2899	853
31f02f48-44a4-445e-ac3d-e9bf3d8d25a2	CR	177873	706	0.004	A/T;687|C/G;8|CA/TG;4|AC/GT;3|AG/CT;2|AT;1|TA;1	A/T;0.9731|C/G;0.0113|CA/TG;0.0057|AC/GT;0.0042|AG/CT;0.0028|AT;0.0014|TA;0.0014	2cfc1abc-5f03-480f-b6ca-c0a66dbd0979/PCAWG.b53f2539-d20a-4549-b061-fcf3a35be49f.bam	911ce07d-5c8d-42e4-b85a-69038a15fd13/PCAWG.6cd64542-56ff-444e-9b5a-29efc28fb5af.bam	6846615	980	0.00014	19138	3695
2df02f2b-9f1c-4249-b3b4-b03079cd97d9	CR	196357	2464	0.0125	A/T;2420|C/G;19|AT;10|TA;6|AC/GT;4|CA/TG;3|GA/TC;2	A/T;0.9821|C/G;0.0077|AT;0.0041|TA;0.0024|AC/GT;0.0016|CA/TG;0.0012|GA/TC;0.0008	4a960a82-841d-4775-b3a1-3f95b2f50a23/PCAWG.0e0d6399-3a1e-4b5a-8f9b-02303edd8f4a.bam	97449717-88cf-4caf-b4f3-d70f1bf7097d/PCAWG.a1f1bcef-0bc0-4a97-8617-1f4b6f493498.bam	7589396	6121	0.00081	2579970	36425
b7f2e85a-3c6a-48b7-8a4f-2dec1d85359d	CR	189197	353	0.0019	A/T;344|C/G;5|AC/GT;1|CA/TG;1|GA/TC;1|AG/CT;1	A/T;0.9745|C/G;0.0142|AC/GT;0.0028|CA/TG;0.0028|GA/TC;0.0028|AG/CT;0.0028	f17a9d28-c776-434b-a92e-f957c1c5861a/PCAWG.2c9c33c7-cd0a-4c7e-9bab-f00200962a84.bam	ed752559-489b-44f1-bf36-3d99a71dad3e/PCAWG.f79360ec-f6ec-4b5e-97b8-ef7c8c9bbed1.bam	7271694	490	7e-05	11504	2422
10ad692b-4c3d-42de-9b5e-4968441388b3	CR	183859	774	0.0042	A/T;756|CA/TG;6|C/G;5|AC/GT;4|AT;2|TA;1	A/T;0.9767|CA/TG;0.0078|C/G;0.0065|AC/GT;0.0052|AT;0.0026|TA;0.0013	f50925bf-e358-4be5-9cd3-5a971866584b/PCAWG.3f072b21-376f-4f58-b782-e3c8f0d6be13.bam	9c2ba587-9f66-4057-b013-f2eec4206a7d/PCAWG.2421a1d5-2c10-4abd-9911-f42a680d8100.bam	7278370	1035	0.00014	12805	4623
93ff786e-0165-4b02-8d27-806d422e93fc	CR	196669	4492	0.0228	A/T;4406|AT;23|C/G;23|AC/GT;14|TA;11|CA/TG;9|GA/TC;3|AACAA/TTGTT;1|CATA/TATG;1|AG/CT;1	A/T;0.9809|AT;0.0051|C/G;0.0051|AC/GT;0.0031|TA;0.0024|CA/TG;0.002|GA/TC;0.0007|AACAA/TTGTT;0.0002|CATA/TATG;0.0002|AG/CT;0.0002	7a7aa90b-1961-4c81-ac55-b2d3e1238074/PCAWG.7e39e79a-7e20-4c7f-87f3-577806f42a04.bam	6e77a3b7-0a12-4ec8-b99c-9371f3413d01/PCAWG.e72c727c-557e-424d-b045-3562a5a0f9c6.bam	7594563	8103	0.00107	1029165	25906
154f80bd-984c-4792-bb89-20c4da0c08e0	CR	193254	1155	0.006	A/T;1129|C/G;10|AT;5|AC/GT;3|GA/TC;3|CA/TG;2|TA;2|AG/CT;1	A/T;0.9775|C/G;0.0087|AT;0.0043|AC/GT;0.0026|GA/TC;0.0026|CA/TG;0.0017|TA;0.0017|AG/CT;0.0009	3b7208e7-8f27-4113-bd40-491a24f56d07/PCAWG.a2e60e30-0024-46b6-8a4d-1e8d748692d8.bam	3f130b75-827e-46f2-ad85-961a76b7489f/PCAWG.2c26276b-dde6-4a42-b032-60949611d595.bam	7475580	2102	0.00028	280604	7425
8a929c55-35a6-4645-bb70-4b85d281b139	CR	197968	536	0.0027	A/T;518|AT;5|C/G;5|AC/GT;3|AG/CT;2|CA/TG;1|GA/TC;1|TA;1	A/T;0.9664|AT;0.0093|C/G;0.0093|AC/GT;0.0056|AG/CT;0.0037|CA/TG;0.0019|GA/TC;0.0019|TA;0.0019	6d21d7cd-6d0d-470b-ac74-6836673416a1/PCAWG.ac04b485-d4db-4eb8-8b01-3a02037f59e9.bam	4ab2cbcc-c1d4-4f29-b6f4-be380a46be99/PCAWG.9da01648-1c38-4f3c-84a7-7b8166390e22.bam	7633920	687	9e-05	15839	3064
f38b5d2e-5cab-45c7-bb0a-38b2efc5c156	CR	172453	144	0.0008	A/T;141|C/G;2|AG/CT;1	A/T;0.9792|C/G;0.0139|AG/CT;0.0069	dffadf32-72cb-4f62-ab81-1c57077560ec/PCAWG.097816c5-8b63-4adc-818d-1a6c685b1892.bam	e7dde293-29cc-4b9b-ab0e-059b763ea972/PCAWG.ae2cc4ec-c3f4-4d4d-b4d8-12a1e35911d9.bam	7019120	237	3e-05	13269	1609
00aa769d-622c-433e-8a8a-63fb5c41ea42	CR	196401	910	0.0046	A/T;898|CA/TG;4|C/G;3|AT;2|TA;2|AC/GT;1	A/T;0.9868|CA/TG;0.0044|C/G;0.0033|AT;0.0022|TA;0.0022|AC/GT;0.0011	2f2d5e3b-54f7-4122-ab51-5adc7dddc062/PCAWG.54ce9151-3bee-4305-a954-d233c7ddff9a.bam	72cf4cdf-1655-409d-8a98-d9b4a830c44a/PCAWG.402285b1-01fb-4ae6-8cdc-aab1d479f31b.bam	7621687	1733	0.00023	253294	5780
42d20028-0ddc-4dac-9f05-d674f8915f21	CR	197388	48593	0.2462	A/T;47251|C/G;506|CA/TG;257|AC/GT;241|AG/CT;108|GA/TC;98|AT;64|TA;54|AAC/GTT;3|ATG/CAT;2	A/T;0.9724|C/G;0.0104|CA/TG;0.0053|AC/GT;0.005|AG/CT;0.0022|GA/TC;0.002|AT;0.0013|TA;0.0011|AAC/GTT;0.0001|ATG/CAT;0	34cd325b-211a-4fe7-bc49-7287d81bb3e5/PCAWG.1ce2bf51-5dd6-4fe0-bf8f-cad0dc609007.bam	4e171c4a-560b-4aac-af53-3b39b0852956/PCAWG.60f264f2-c652-4726-839c-47ac3b90ffb2.bam	7626384	66024	0.00866	182897	198335
711c8a16-3cf8-42d8-b29e-fd1e9ef1c82b	CR	198354	57362	0.2892	A/T;55546|C/G;741|CA/TG;361|AC/GT;345|AG/CT;94|GA/TC;90|TA;86|AT;77|ATC/GAT;3|AAC/GTT;3	A/T;0.9683|C/G;0.0129|CA/TG;0.0063|AC/GT;0.006|AG/CT;0.0016|GA/TC;0.0016|TA;0.0015|AT;0.0013|ATC/GAT;0.0001|AAC/GTT;0.0001	0f828302-4bfc-4649-b072-78e321375f14/PCAWG.13efafee-7cff-40a6-bd87-b8d24c5e0c24.bam	5f98a977-24bc-4029-8ddd-7dc3a472f170/PCAWG.89addeb5-53d6-4055-aee5-7918dd5cd90f.bam	7644336	79284	0.01037	139516	228716
4019c219-c51e-479f-8a9d-cfa6816ed696	CR	178524	1022	0.0057	A/T;992|C/G;18|CA/TG;4|AT;2|AC/GT;2|TA;2|AG/CT;2	A/T;0.9706|C/G;0.0176|CA/TG;0.0039|AT;0.002|AC/GT;0.002|TA;0.002|AG/CT;0.002	98ed13f1-cef6-470a-a9ba-53127ec74e42/PCAWG.f72cbd66-b5cc-469b-afe3-65d8f9994903.bam	83a478a0-df5d-4e2e-a0a9-ec6a4fc3568c/PCAWG.f7b6b418-3f20-4832-87f1-483d400716bf.bam	6969929	1467	0.00021	24880	5086
d3d65db3-36f9-41c7-8e5e-1683ce94dfcb	CR	197560	746	0.0038	A/T;728|C/G;7|AC/GT;5|CA/TG;2|AT;1|TA;1|AG/CT;1|GA/TC;1	A/T;0.9759|C/G;0.0094|AC/GT;0.0067|CA/TG;0.0027|AT;0.0013|TA;0.0013|AG/CT;0.0013|GA/TC;0.0013	81046bf0-6bbd-4cfe-ada4-6af8ddea5433/PCAWG.a90d8746-02a8-4ef5-9eb0-8c6334fef070.bam	32ed8a4f-3987-48e9-b0f0-383f12b07c64/PCAWG.963004f2-6200-4d73-8b08-dec4720219f4.bam	7615696	987	0.00013	14875	3772
d9690a27-bb02-498e-b15c-ee76e31d16ee	CR	143337	811	0.0057	A/T;782|C/G;12|AC/GT;6|AT;5|AG/CT;2|GA/TC;2|TA;1|CA/TG;1	A/T;0.9642|C/G;0.0148|AC/GT;0.0074|AT;0.0062|AG/CT;0.0025|GA/TC;0.0025|TA;0.0012|CA/TG;0.0012	7ba4f79b-5b53-4d3e-b5c0-d7697bac46ec/PCAWG.1d9760f4-b91d-4a05-8234-dbdc940699d4.bam	5faa4b32-39cb-4828-a469-29cec06ca5ec/PCAWG.9c43a613-b504-4e78-865c-06aae59b504d.bam	6101596	1190	0.0002	21158	5651
492b4e58-12e2-47b2-bd47-28f8607072fa	CR	198408	930	0.0047	A/T;907|C/G;8|CA/TG;6|AC/GT;5|GA/TC;2|TA;1|AG/CT;1	A/T;0.9753|C/G;0.0086|CA/TG;0.0065|AC/GT;0.0054|GA/TC;0.0022|TA;0.0011|AG/CT;0.0011	c2843785-df10-4f67-9469-e52206d9004a/PCAWG.de566fde-6bb8-4c58-8d26-4873267a9e7a.bam	57d2ff25-4b2e-41fe-a394-a76aacf52298/PCAWG.d8ec4d2a-d78b-4710-9112-ffced6d4f3e9.bam	7646269	1310	0.00017	23336	4448
3c019b2f-52ec-40a8-99b5-98c1423ce627	CR	176901	774	0.0044	A/T;757|AC/GT;5|C/G;5|CA/TG;3|CAA/TTG;1|TA;1|AAAC/GTTT;1|GA/TC;1	A/T;0.978|AC/GT;0.0065|C/G;0.0065|CA/TG;0.0039|CAA/TTG;0.0013|TA;0.0013|AAAC/GTTT;0.0013|GA/TC;0.0013	5a85c05a-0920-4667-9893-97040243aebb/PCAWG.2ac1f67f-9691-43ff-a511-7a818ad89d36.bam	eeeba494-c8aa-42cf-a886-a78eccad12f4/PCAWG.8f370446-69c9-4b46-af3a-5bf924e57c34.bam	6986536	1166	0.00017	21336	4395
d3daf373-1485-455e-a0a1-8e33d215d623	CR	183100	417	0.0023	A/T;401|C/G;7|CA/TG;4|TA;2|AC/GT;1|AT;1|GA/TC;1	A/T;0.9616|C/G;0.0168|CA/TG;0.0096|TA;0.0048|AC/GT;0.0024|AT;0.0024|GA/TC;0.0024	40ad78fc-63b0-4431-9716-288f6ec67313/PCAWG.a84c0a9d-29b3-4699-a292-04dd5bb543ba.bam	8c7f65a4-6281-4e5b-8908-32dc2ea9cb0c/PCAWG.3f77f546-687a-4432-ba01-02e670be2ed5.bam	7246721	560	8e-05	17026	2683
31e63f89-a6a9-40fb-823d-f41587bd73d8	CR	188150	40237	0.2139	A/T;39134|C/G;403|CA/TG;221|AC/GT;208|GA/TC;83|AG/CT;76|AT;53|TA;52|AAAC/GTTT;2|ACAG/CTGT;1	A/T;0.9726|C/G;0.01|CA/TG;0.0055|AC/GT;0.0052|GA/TC;0.0021|AG/CT;0.0019|AT;0.0013|TA;0.0013|AAAC/GTTT;0|ACAG/CTGT;0	019521e0-0326-4625-b979-babec5c95a2f/PCAWG.c38bc603-2f38-4c94-b0af-b7ee1df6972b.bam	35ff7acf-8f44-4333-b98b-1e463a9e8265/PCAWG.6b57df66-ed67-4056-9c9b-11e32ef0622e.bam	7348027	51580	0.00702	100514	149592
a64000df-16e5-4b88-865f-5c680adf60eb	CR	170565	539	0.0032	A/T;520|C/G;9|CA/TG;4|AC/GT;2|AT;1|TA;1|AG/CT;1|GA/TC;1	A/T;0.9647|C/G;0.0167|CA/TG;0.0074|AC/GT;0.0037|AT;0.0019|TA;0.0019|AG/CT;0.0019|GA/TC;0.0019	3b9abeff-d8a2-4142-9040-34b23a4c69c0/PCAWG.7f12750d-5bb8-41c8-b9b0-ddcce718ed49.bam	c78a5e63-4897-4489-814b-dc6ae31de64a/PCAWG.3c77724b-772e-489b-a410-25f896d8620c.bam	6851540	752	0.00011	8246	3414
05486349-24a4-4931-bf5f-c9fefe369af2	CR	198107	297	0.0015	A/T;291|CA/TG;3|C/G;2|AC/GT;1	A/T;0.9798|CA/TG;0.0101|C/G;0.0067|AC/GT;0.0034	94a163f9-b32e-4406-8b02-1080e37b2f8b/PCAWG.4f9501ea-e4af-4802-8b87-46339bb471d6.bam	d05b74b3-de31-4848-83a8-c963180ff939/PCAWG.14b228c0-72c5-4c25-aaa5-da8e5b13eef7.bam	7638195	402	5e-05	9375	2163
303abbe5-4155-4a0d-bc3b-f8995261ca52	CR	195951	28010	0.1429	A/T;27565|C/G;287|AC/GT;52|CA/TG;46|AT;25|AG/CT;11|GA/TC;11|TA;8|AAAC/GTTT;1|AACAA/TTGTT;1	A/T;0.9841|C/G;0.0102|AC/GT;0.0019|CA/TG;0.0016|AT;0.0009|AG/CT;0.0004|GA/TC;0.0004|TA;0.0003|AAAC/GTTT;0|AACAA/TTGTT;0	0ecb0296-150e-4140-b830-831352391606/PCAWG.0f47ca39-45c0-406d-8188-6aa93c3875ce.bam	0e8a5ee3-d4f6-4575-825d-8e02f7a7ba41/PCAWG.b3d6a32e-0b4a-4d04-96c6-34c0d3052c06.bam	7592347	34900	0.0046	145655	110576
d3aff5d3-23c0-43ae-9c01-8ddd776b530b	CR	181454	472	0.0026	A/T;449|C/G;8|AC/GT;5|AT;3|CA/TG;3|TA;2|AG/CT;1|GA/TC;1	A/T;0.9513|C/G;0.0169|AC/GT;0.0106|AT;0.0064|CA/TG;0.0064|TA;0.0042|AG/CT;0.0021|GA/TC;0.0021	e052a58d-c204-43d1-9d10-ffbb4618a520/PCAWG.5e8cd173-e3a0-46cc-ae99-cfd2feeefddc.bam	b267ae7f-d3fe-4a3e-942e-ccad236f76e7/PCAWG.1c98d8d4-b35e-4503-a821-cbb788561cc7.bam	7189118	658	9e-05	14426	3852
4cfb0aee-6661-478a-8694-9d8ba15e46b7	CR	197567	1145	0.0058	A/T;1121|C/G;10|AC/GT;5|GA/TC;3|AT;2|CA/TG;2|TA;1|AG/CT;1	A/T;0.979|C/G;0.0087|AC/GT;0.0044|GA/TC;0.0026|AT;0.0017|CA/TG;0.0017|TA;0.0009|AG/CT;0.0009	c9e3cf3a-bb8d-4547-81b2-36a4735eaa98/PCAWG.b6086f31-c71b-4c17-ab6c-157357cb92d5.bam	a5517559-fe78-47e4-a739-cd9cbe622463/PCAWG.bb5987f3-b5db-4b4f-ad33-fc64a79beaa0.bam	7629401	1509	0.0002	23644	5135
b6b6e1d3-c592-4836-bdad-d53af2dbcc9a	CR	153582	708	0.0046	A/T;686|C/G;15|AT;3|TA;2|CA/TG;2	A/T;0.9689|C/G;0.0212|AT;0.0042|TA;0.0028|CA/TG;0.0028	82d96593-fc12-452a-8871-8ba4a3d88713/PCAWG.765cec98-9164-43bf-be0e-139778047a59.bam	a34c450f-4dde-4de2-aba3-da73697299b0/PCAWG.3d60f92e-5d4d-439e-aad8-f80cdeaae8e7.bam	6370188	1013	0.00016	19958	5099
b2afbcba-d67d-43f1-be3b-05f3a5836ec0	CR	178683	777	0.0043	A/T;761|C/G;8|CA/TG;3|AC/GT;2|AT;1|TA;1|AG/CT;1	A/T;0.9794|C/G;0.0103|CA/TG;0.0039|AC/GT;0.0026|AT;0.0013|TA;0.0013|AG/CT;0.0013	bb31b542-1b0f-4b0e-8e63-3d5a2b291b9d/PCAWG.8d92fa90-c70f-4e37-84ec-f1f1836ce4ed.bam	0c93ac95-2efa-4125-bed7-fc4be45f0bff/PCAWG.6aef5036-5811-405c-9c9e-c1566dd6f9c2.bam	6971700	1020	0.00015	15386	3634
6051f40a-99e5-4461-9255-0e70d757b4d5	CR	175227	286	0.0016	A/T;278|CA/TG;3|AC/GT;1|AT;1|TA;1|GA/TC;1|C/G;1	A/T;0.972|CA/TG;0.0105|AC/GT;0.0035|AT;0.0035|TA;0.0035|GA/TC;0.0035|C/G;0.0035	fce32934-acda-46ea-a1df-e7d6f78c57a7/PCAWG.ac75359d-0326-4b90-86fd-2112a262b07d.bam	01bc3c40-0e38-4766-adc7-cd6384b464e4/PCAWG.b36eb753-28e9-4f61-88a0-20f076b2736f.bam	6971947	424	6e-05	33260	2173
ec43c4b5-fb72-4a4a-af03-10c2d05ff159	CR	196214	58362	0.2974	A/T;56312|C/G;659|AC/GT;478|CA/TG;456|GA/TC;146|AG/CT;142|AT;86|TA;72|ATC/GAT;2|CAGA/TCTG;1	A/T;0.9649|C/G;0.0113|AC/GT;0.0082|CA/TG;0.0078|GA/TC;0.0025|AG/CT;0.0024|AT;0.0015|TA;0.0012|ATC/GAT;0|CAGA/TCTG;0	7d1c5057-0d6c-4657-9c1b-739b6dfa180c/PCAWG.388b4331-1887-460c-a0d3-6b9a1f912cc5.bam	ae55df29-a58b-47c4-85d0-40823b3db65d/PCAWG.112d8768-02f2-436c-b794-ac04957c93aa.bam	7618863	79208	0.0104	109650	263239
2182ce2c-5941-4b65-9419-fc7966d5e6d5	CR	196424	65336	0.3326	A/T;62958|C/G;900|AC/GT;472|CA/TG;435|GA/TC;181|AG/CT;166|TA;103|AT;102|AAAC/GTTT;2|AACA/TGTT;2	A/T;0.9636|C/G;0.0138|AC/GT;0.0072|CA/TG;0.0067|GA/TC;0.0028|AG/CT;0.0025|TA;0.0016|AT;0.0016|AAAC/GTTT;0|AACA/TGTT;0	00061dd5-3368-4c2e-93f4-8a15c31c31cf/PCAWG.f6dae466-c3ca-4785-b725-0ba7bebe7a64.bam	ece6f299-d602-4572-a5d1-e5b826520b98/PCAWG.6e53c5fc-7303-4839-a09d-4c23e517d274.bam	7606215	91097	0.01198	132091	271044
9e5f0a23-e184-4611-b42b-e882dcf23acd	CR	177163	853	0.0048	A/T;831|C/G;11|AT;3|GA/TC;3|AC/GT;2|CA/TG;2|TA;1	A/T;0.9742|C/G;0.0129|AT;0.0035|GA/TC;0.0035|AC/GT;0.0023|CA/TG;0.0023|TA;0.0012	e42782f6-5141-4e04-aadb-4aa20ab8531c/PCAWG.74663f47-0859-4209-a00b-0ecf8c66bc60.bam	8503b7ec-7e7e-4283-8d25-d559342c27b9/PCAWG.76f84868-1e60-4868-988b-0a20783f7e14.bam	7001377	1142	0.00016	21058	4832
f4b9d98f-7b76-4eaa-9595-10b0973d5ff7	CR	159591	39481	0.2474	A/T;38334|C/G;476|AC/GT;249|CA/TG;228|GA/TC;83|AG/CT;67|AT;21|TA;13|AAC/GTT;3|ATG/CAT;1	A/T;0.9709|C/G;0.0121|AC/GT;0.0063|CA/TG;0.0058|GA/TC;0.0021|AG/CT;0.0017|AT;0.0005|TA;0.0003|AAC/GTT;0.0001|ATG/CAT;0	440433b1-16a8-4fc9-b612-549e38774422/PCAWG.b88da23c-e14d-4b74-b43f-3c64ab307ca3.bam	59f2e2ea-0c0b-4827-8c68-d66e6c35143f/PCAWG.6257baa6-3e82-4974-b796-24196748065b.bam	6551990	55390	0.00845	114693	156245
e3ef5cad-4d6e-4f04-babb-a908ee02644b	CR	196755	488	0.0025	A/T;464|C/G;8|AC/GT;4|AT;4|CA/TG;3|AG/CT;2|ACACA/TGTGT;1|TA;1|GA/TC;1	A/T;0.9508|C/G;0.0164|AC/GT;0.0082|AT;0.0082|CA/TG;0.0061|AG/CT;0.0041|ACACA/TGTGT;0.002|TA;0.002|GA/TC;0.002	6eb072a7-5c3b-4adb-b3d3-78303bb8f6a6/PCAWG.9c2006cb-79e6-49c1-993d-dad0ee88edf9.bam	e6d8b1ba-ca51-4734-be4a-07a2fac17094/PCAWG.376a4b9b-94b9-4fd7-b3f0-96712f54428a.bam	7608595	671	9e-05	21221	3242
55345803-83d4-4fdb-b0ee-328753801da1	CR	198185	1637	0.0083	A/T;1599|C/G;19|CA/TG;6|AT;4|AC/GT;4|TA;4|GA/TC;1	A/T;0.9768|C/G;0.0116|CA/TG;0.0037|AT;0.0024|AC/GT;0.0024|TA;0.0024|GA/TC;0.0006	250c7c55-b640-4c34-8853-3013bbd7176a/PCAWG.fb0079ec-f1c7-4715-b97c-55d826559aa3.bam	b24c9832-7e47-44b4-8f81-cd6f27b20444/PCAWG.761b7816-f95a-4734-a1de-964efa1d39ef.bam	7639909	2216	0.00029	23327	6623
080ecc31-756a-4a1b-a51e-d632ac8219f7	CR	198066	634	0.0032	A/T;614|C/G;6|CA/TG;5|AC/GT;3|AG/CT;3|AT;2|TA;1	A/T;0.9685|C/G;0.0095|CA/TG;0.0079|AC/GT;0.0047|AG/CT;0.0047|AT;0.0032|TA;0.0016	80f654fd-b0a6-496f-8c74-4f4bfa00c2dd/PCAWG.2d002a1f-6188-445b-a9ea-f49e5aba1018.bam	9bd96139-6784-4c96-b419-24e685b3238d/PCAWG.5bc4b7ec-f632-422b-ba14-6a1aaa9cf929.bam	7636876	927	0.00012	28683	4108
85e29049-a5e8-49fa-a576-e113c7b2c2e3	CR	179037	172	0.001	A/T;163|C/G;3|CA/TG;2|AT;1|AC/GT;1|TA;1|CATC/GATG;1	A/T;0.9477|C/G;0.0174|CA/TG;0.0116|AT;0.0058|AC/GT;0.0058|TA;0.0058|CATC/GATG;0.0058	57f7616f-6466-451a-8a9d-7939dd107859/PCAWG.922b67b6-fd60-4190-b92c-b194f8a7af69.bam	b39c6d7f-ec40-44e9-87ee-467307e0809b/PCAWG.39f7b71c-b455-44f4-89e6-0d61742b3a06.bam	7138375	261	4e-05	12206	1615
63bc376e-5a3d-44fd-8d77-686dfc41e458	CR	198141	2700	0.0136	A/T;2570|C/G;54|AC/GT;26|CA/TG;24|GA/TC;10|AG/CT;9|TA;4|AT;2|CAA/TTG;1	A/T;0.9519|C/G;0.02|AC/GT;0.0096|CA/TG;0.0089|GA/TC;0.0037|AG/CT;0.0033|TA;0.0015|AT;0.0007|CAA/TTG;0.0004	4adffbee-dc5e-4e11-8909-ffeb2d5f3fc2/PCAWG.78ac6448-0217-4b73-9607-23b7de84b8f1.bam	c35a5d07-ccc2-4cbb-a816-78cd908e15e8/PCAWG.be304f64-d01b-4a09-8f10-4d44aa3f3266.bam	7640502	3376	0.00044	29365	25691
a0f94565-9169-49ee-8e6a-21bdc43d9de6	CR	169275	443	0.0026	A/T;428|C/G;8|CA/TG;4|AT;1|AC/GT;1|TA;1	A/T;0.9661|C/G;0.0181|CA/TG;0.009|AT;0.0023|AC/GT;0.0023|TA;0.0023	b7c23f0b-a43b-4933-bdee-9f770e89f5d9/PCAWG.9fc66d8c-133d-430f-8a2e-2d1a11e7ef8d.bam	9643dd35-5793-4581-9fe4-0f1b5a72681e/PCAWG.b687ab8e-8210-469c-a914-2299c00443ef.bam	6857381	657	0.0001	14359	3228
a9d1b074-7f36-4a04-b270-a2061249ff20	CR	179559	5062	0.0282	A/T;4969|C/G;55|CA/TG;10|AT;9|AC/GT;7|TA;6|GA/TC;2|AG/CT;1|AAAC/GTTT;1|CAAA/TTTG;1	A/T;0.9816|C/G;0.0109|CA/TG;0.002|AT;0.0018|AC/GT;0.0014|TA;0.0012|GA/TC;0.0004|AG/CT;0.0002|AAAC/GTTT;0.0002|CAAA/TTTG;0.0002	0d1c4cda-dce1-44bc-9b33-6cf8e7361d56/PCAWG.5b2310fd-8abc-4221-9851-74618315d3e0.bam	eb1207f2-f5f5-4493-87d5-8d30770555e5/PCAWG.43ceaba1-275e-4b98-8343-baaed0d66a54.bam	7261406	10513	0.00145	1192915	33073
66701395-5a53-41bb-866b-3bbf08bc33ab	CR	139988	382	0.0027	A/T;365|C/G;6|CA/TG;4|AC/GT;3|GA/TC;2|AG/CT;1|AACA/TGTT;1	A/T;0.9555|C/G;0.0157|CA/TG;0.0105|AC/GT;0.0079|GA/TC;0.0052|AG/CT;0.0026|AACA/TGTT;0.0026	af29bbde-2275-4fc5-8a3f-211412e6a890/PCAWG.a84299e7-b9b1-4e71-8941-1d8a0c9963bf.bam	f365986e-cd03-4607-bbd9-cefa6332cbf2/PCAWG.f82ec484-8aae-4ed1-a527-fbe3b006cd45.bam	6124452	580	9e-05	14435	3503
0980e7fd-051d-45e9-9ca6-2baf073da4e8	CR	196978	1475	0.0075	A/T;1450|C/G;10|CA/TG;5|AT;4|TA;3|AC/GT;2|AG/CT;1	A/T;0.9831|C/G;0.0068|CA/TG;0.0034|AT;0.0027|TA;0.002|AC/GT;0.0014|AG/CT;0.0007	47b22877-5f5d-4fa6-bdbf-99be84fa07b5/PCAWG.d7a500b3-4904-4882-8730-c19da5d80ec0.bam	314d37dc-625e-4f01-87a3-4a6a884bd32f/PCAWG.9851e8f5-b032-41d0-82a2-35ca8deda38b.bam	7607924	3278	0.00043	911186	10546
d0a0d845-32e2-4590-b909-29bd27b92900	CR	197337	582	0.0029	A/T;557|C/G;11|AC/GT;5|CA/TG;4|AT;2|CAA/TTG;1|TA;1|GA/TC;1	A/T;0.957|C/G;0.0189|AC/GT;0.0086|CA/TG;0.0069|AT;0.0034|CAA/TTG;0.0017|TA;0.0017|GA/TC;0.0017	c8b22184-5749-4160-b779-55d6a06a5618/PCAWG.b52d188c-bf18-4029-9050-cbf8d9f99ee3.bam	349758a0-17b0-4cb8-962d-8b71e9ee3519/PCAWG.fb993aca-bded-4304-a0f4-f38fa427cc7f.bam	7616035	790	0.0001	16199	3447
75ad15b9-8f9c-40c1-9ca6-1e8454fbd310	CR	182108	235	0.0013	A/T;224|AT;3|AC/GT;2|TA;2|CA/TG;2|AG/CT;1|C/G;1	A/T;0.9532|AT;0.0128|AC/GT;0.0085|TA;0.0085|CA/TG;0.0085|AG/CT;0.0043|C/G;0.0043	aa3265ad-8226-4f1c-ad65-8b533540bbbe/PCAWG.c95c1fe9-c156-4c41-ac14-f07214e5e613.bam	e55b351a-28d5-45dc-bae0-38198d3752b7/PCAWG.b2f57308-2c3c-41a0-b866-c3cb60a82b1e.bam	7163924	389	5e-05	15624	2454
fc453f67-6623-4e8c-b519-0bd79e4d4651	CR	179159	1008	0.0056	A/T;970|C/G;17|CA/TG;6|AT;4|AG/CT;4|GA/TC;3|AC/GT;2|TA;2	A/T;0.9623|C/G;0.0169|CA/TG;0.006|AT;0.004|AG/CT;0.004|GA/TC;0.003|AC/GT;0.002|TA;0.002	0a40f68c-6f51-4b43-baa0-28e56c62f789/PCAWG.0e36625c-8e03-4769-bae0-f9abdb71e740.bam	6d0b4d60-6581-4060-b067-d23c26f83844/PCAWG.12863f2c-7aa2-4371-bad7-b0976ba3cc18.bam	7118471	1405	0.0002	30291	6057
2cdc4cce-0877-4ec1-85f5-20c909912e65	CR	188065	604	0.0032	A/T;573|C/G;19|CA/TG;6|AC/GT;2|AT;2|GA/TC;2	A/T;0.9487|C/G;0.0315|CA/TG;0.0099|AC/GT;0.0033|AT;0.0033|GA/TC;0.0033	794a3b18-ff82-4698-a0b0-5c1097a8314c/PCAWG.83301238-76b0-4013-a669-a3e9121f547f.bam	a4e83857-b1ff-4a38-837f-9bf99c4644be/PCAWG.f0b7370f-8473-415b-86e7-9cb1d96c1411.bam	7391787	809	0.00011	13926	3077
bd403458-5154-488b-931a-a7e737a6bf8c	LY	174209	543	0.0031	A/T;531|C/G;7|AG/CT;2|AC/GT;1|CA/TG;1|GA/TC;1	A/T;0.9779|C/G;0.0129|AG/CT;0.0037|AC/GT;0.0018|CA/TG;0.0018|GA/TC;0.0018	b8c41d90-0332-4805-a9ec-ad714fb3f725/PCAWG.83ae433d-6f95-43bb-8fe2-e8b14abfe89c.bam	f07c6f4d-7290-401e-9ef2-bc3786416803/PCAWG.aa2aec24-b8bc-4127-b0f8-66c5fc8a0068.bam	6965053	712	0.0001	19916	2592
fa676301-902f-473f-8313-5bff34ae549a	LY	187286	980	0.0052	A/T;961|C/G;8|AT;3|TA;3|AC/GT;2|CA/TG;2|GA/TC;1	A/T;0.9806|C/G;0.0082|AT;0.0031|TA;0.0031|AC/GT;0.002|CA/TG;0.002|GA/TC;0.001	a04845e7-c0c4-40f2-bde3-a401626169f1/PCAWG.26f54e5b-8c5e-4b82-aa0a-8f79d3b13535.bam	153dfe20-03aa-428d-8612-bcc83fa63763/PCAWG.aebf9849-0f03-4446-9fc8-df89a22aa0a8.bam	7356792	1315	0.00018	23602	4754
aa847c3d-d3a7-46aa-a81b-db5099a458fb	LY	188676	399	0.0021	A/T;393|C/G;6	A/T;0.985|C/G;0.015	323a3a3e-3431-4562-8923-51617968ffa1/PCAWG.0ae6c5d8-7103-41d2-a101-747c6d349a21.bam	c8baa10d-4bd9-46b7-bb40-362845c07845/PCAWG.5f58b6fd-fceb-4d5a-a701-43fcd811d106.bam	7361289	502	7e-05	8384	1742
e89e9c69-ffcd-4a4c-818d-1dee43ddc76a	LY	184980	1114	0.006	A/T;1096|C/G;8|AC/GT;3|AT;3|CA/TG;3|ACAA/TTGT;1	A/T;0.9838|C/G;0.0072|AC/GT;0.0027|AT;0.0027|CA/TG;0.0027|ACAA/TTGT;0.0009	43ac273a-82cc-4f76-9ddd-8146c6904b0c/PCAWG.9279c689-e0a2-4d8f-a355-25f7db75f96b.bam	adf49d6d-d523-4165-b2d0-213fda98f145/PCAWG.fa54148a-e42e-4129-9e5a-1f303c74f8ce.bam	7276348	1349	0.00019	11895	5199
a29278af-7ecf-403e-b6a9-623ea7879d05	LY	182164	682	0.0037	A/T;675|C/G;3|GA/TC;2|AC/GT;1|CA/TG;1	A/T;0.9897|C/G;0.0044|GA/TC;0.0029|AC/GT;0.0015|CA/TG;0.0015	fd2af5cb-46f4-421a-bfad-8d34dda93def/PCAWG.5de55178-2bb4-4307-b1a2-a8d7ca0ac2d6.bam	5b81b48d-859c-43a2-87eb-7677a2c8ea4c/PCAWG.5ccb910d-7b0b-4b2d-9471-4ec5a5582b53.bam	7200904	865	0.00012	20244	3525
897a4500-6fb8-4e81-aa07-021a26d632fb	LY	182744	502	0.0027	A/T;487|C/G;8|CA/TG;3|AC/GT;2|GA/TC;1|AAC/GTT;1	A/T;0.9701|C/G;0.0159|CA/TG;0.006|AC/GT;0.004|GA/TC;0.002|AAC/GTT;0.002	0a184b17-ccb0-4671-8250-9b683dcebdaf/PCAWG.e736d10b-57b2-494d-ac93-89bfd0b84b3f.bam	87a7f776-7bb1-4070-ae2a-0d94be5efad7/PCAWG.13cf7527-6a58-4f25-a2d6-ac8ed97fcbe1.bam	7228800	671	9e-05	38146	3073
1b1780d5-06da-40ee-9e15-02631a68027b	LY	184035	725	0.0039	A/T;715|CA/TG;3|C/G;3|TA;2|AC/GT;1|AT;1	A/T;0.9862|CA/TG;0.0041|C/G;0.0041|TA;0.0028|AC/GT;0.0014|AT;0.0014	d9d8fded-4bbd-4b23-9d16-be84bc1d1658/PCAWG.c86618fe-4f40-4d02-ae02-ffbd278e30df.bam	f623e756-db48-4237-8dce-f37085f0fe6b/PCAWG.d377e9ad-6da5-4d73-8b1c-f1bd02a3862f.bam	7243557	909	0.00013	13810	3665
EOPC-01_tumor	PR	188517	347	0.0018	A/T;322|C/G;8|AC/GT;7|CA/TG;4|TA;3|AT;2|AG/CT;1	A/T;0.928|C/G;0.0231|AC/GT;0.0202|CA/TG;0.0115|TA;0.0086|AT;0.0058|AG/CT;0.0029	1c3bc9bf-8795-4918-b313-b49ce0102d19/e3b7f21d48d4d74c550eab504842595e.bam	b3e35630-6220-443a-b8ba-a1074f237a65/10093ecd541619eae3b7270d6dc3ac5c.bam	7406606	556	8e-05	11821	2285
EOPC-010_tumor	PR	189325	27	0.0001	A/T;21|TA;2|C/G;2|AC/GT;1|CA/TG;1	A/T;0.7778|TA;0.0741|C/G;0.0741|AC/GT;0.037|CA/TG;0.037	3c3a7372-559e-465d-940b-026821ae35b3/676f291e99e93832adaa8b65badf9980.bam	1719dda4-c619-4dc5-ba40-f9a99b007a96/21f4c5aa649b4c456dd85932f8c45579.bam	7385239	39	1e-05	2581	565
EOPC-017_tumor	PR	194784	19	0.0001	A/T;13|AC/GT;2|CA/TG;2|AT;1|TA;1	A/T;0.6842|AC/GT;0.1053|CA/TG;0.1053|AT;0.0526|TA;0.0526	27d32117-c5fc-480b-8d00-12cd351c8177/ee0e644f8536b93b08c145bdc68bdaa8.bam	03df2592-ba1a-4e7d-afa0-a454488475ec/ed0a4d0840cd48f19242feb5590142b6.bam	7550476	33	0	1792	509
EOPC-018_tumor	PR	197489	21	0.0001	A/T;14|CA/TG;4|AC/GT;2|TA;1	A/T;0.6667|CA/TG;0.1905|AC/GT;0.0952|TA;0.0476	ee6ca26a-e2e1-45fc-a131-7f5ae4996160/df8c085c63654dbecf6e9b75f69a360d.bam	5c2ef10d-91e9-4d92-847a-488233bc621b/c237b11d9c3ec0779df600e41ffeba7d.bam	7635948	30	0	1750	425
EOPC-019_tumor	PR	192076	19	0.0001	A/T;10|AC/GT;3|CA/TG;2|C/G;2|AT;1|TA;1	A/T;0.5263|AC/GT;0.1579|CA/TG;0.1053|C/G;0.1053|AT;0.0526|TA;0.0526	16510598-862f-41b7-b5f9-8b2778371d22/acfb948e2f5ba41670ad540a9b454eb1.bam	b07173a9-8ab2-4b45-b0d8-92370a591918/8def9fb05960331c82c5ce4dd24f0967.bam	7574640	33	0	2028	602
EOPC-02_tumor	PR	175419	35	0.0002	A/T;25|CA/TG;5|AC/GT;2|TA;1|AG/CT;1|GA/TC;1	A/T;0.7143|CA/TG;0.1429|AC/GT;0.0571|TA;0.0286|AG/CT;0.0286|GA/TC;0.0286	e1fea320-24d7-4e3e-946e-7987519e11fd/54b0a6d95e8d39d61277a01f22dcb92b.bam	07059078-ce48-4e34-8e51-c437fc462139/efb735b2665a04d06edbddec2fdd4970.bam	7129605	58	1e-05	5583	3836
EOPC-021_tumor	PR	198035	10	0.0001	A/T;7|AC/GT;1|TA;1|CA/TG;1	A/T;0.7|AC/GT;0.1|TA;0.1|CA/TG;0.1	618d1610-015f-445d-a38e-871fcf2768d9/7dd0e907add6967a89fb0d6c38eaee6a.bam	c44099ff-3bf7-4309-97c6-8221432062b7/befca8a1d106128aa28f78b4c5c352c3.bam	7642373	15	0	1899	444
EOPC-022_tumor	PR	197628	14	0.0001	A/T;12|TA;2	A/T;0.8571|TA;0.1429	fef1b1df-333c-435a-8ec2-9bfe2791a523/9f5ef960d6d7e05866163ffaa720632c.bam	75b71bec-691a-4b18-99ac-3c38d56c4a7c/77fe66c3e86954f6aa7fcd6591e8704b.bam	7639295	32	0	2340	369
EOPC-023_tumor	PR	198504	13	0.0001	A/T;9|AC/GT;1|TA;1|CA/TG;1|GA/TC;1	A/T;0.6923|AC/GT;0.0769|TA;0.0769|CA/TG;0.0769|GA/TC;0.0769	f67df370-b5f5-43aa-b5d4-a14e9ae7b73d/4181ff4ddbba15c39e5df659e61542c7.bam	f41a3eac-4c68-40d7-a90a-04d638e72f3b/fb80c4246cf9714ead7216045b0a3e84.bam	7649406	25	0	2105	437
EOPC-024_tumor	PR	198094	6	0	A/T;4|AC/GT;1|CA/TG;1	A/T;0.6667|AC/GT;0.1667|CA/TG;0.1667	e7a0a8ca-2769-497a-8020-0ca86f3dc9ab/c2ac209d326f88c7ab7cd9db691501ce.bam	06bd7853-45ee-4d46-9640-4fff0dbd7773/55586420804beee4b8d6b3488aaa3b7c.bam	7644933	12	0	1620	379
EOPC-025_tumor	PR	191059	27	0.0001	A/T;16|CA/TG;6|AC/GT;2|C/G;2|TA;1	A/T;0.5926|CA/TG;0.2222|AC/GT;0.0741|C/G;0.0741|TA;0.037	75ac9442-9dfe-499b-9d6d-57cd6ada78da/9089ae42913775f07cd9fed601c013d8.bam	c568ca2b-ffbb-4859-95b3-4ecc06b1407b/ea987d0a4a1b7047f9af63430d49e1c0.bam	7557462	33	0	2003	646
EOPC-026_tumor	PR	195483	13	0.0001	A/T;6|CA/TG;3|AT;2|AC/GT;2	A/T;0.4615|CA/TG;0.2308|AT;0.1538|AC/GT;0.1538	bfbc3d9f-6571-4df9-9273-5ceee349ba56/05bd95a8ce939d7feab9a0e05cde6939.bam	e2004002-9f5d-4428-b899-d9b9ed431044/c9fee8f052152acffc8d75dd07dd06d5.bam	7588098	14	0	562	527
EOPC-027_tumor_02	PR	192057	34	0.0002	A/T;21|CA/TG;4|AT;3|AC/GT;3|C/G;3	A/T;0.6176|CA/TG;0.1176|AT;0.0882|AC/GT;0.0882|C/G;0.0882	d3c662cd-3795-4262-82a6-bbe44e66cc47/ef5b4e976201f4f9115a647efa6e2bc0.bam	e082982f-04d8-4657-a10e-b8edf5d2c951/4c470092cce29704972a6db4b3be75c9.bam	7557072	54	1e-05	2545	477
EOPC-027_tumor_01	PR	194023	21	0.0001	A/T;17|AC/GT;2|AT;1|TA;1	A/T;0.8095|AC/GT;0.0952|AT;0.0476|TA;0.0476	d3c662cd-3795-4262-82a6-bbe44e66cc47/ef5b4e976201f4f9115a647efa6e2bc0.bam	131621e3-08b0-43ce-a0a3-49d180bfbe4d/73ab4bd090343e805c7c7f78cd98f0e1.bam	7596710	35	0	2434	359
EOPC-028_tumor_01	PR	196970	10	0.0001	A/T;7|C/G;2|CA/TG;1	A/T;0.7|C/G;0.2|CA/TG;0.1	4214de75-2a47-4c3d-b6ae-6fddc9bbb676/bc34cb9d887dda3e69a8f13563d429be.bam	a951b62f-585d-4f5b-9e24-2f8ca59f7a73/c9d002c8c3d0fd3379751448d0fb83b9.bam	7638882	14	0	1790	594
EOPC-028_tumor_02	PR	195394	14	0.0001	A/T;6|CA/TG;3|TA;2|AC/GT;1|AT;1|GA/TC;1	A/T;0.4286|CA/TG;0.2143|TA;0.1429|AC/GT;0.0714|AT;0.0714|GA/TC;0.0714	4214de75-2a47-4c3d-b6ae-6fddc9bbb676/bc34cb9d887dda3e69a8f13563d429be.bam	8eb6d604-a922-45bc-b069-43ea683ec0aa/4a53031914972a80db522191d8faa956.bam	7622537	23	0	1460	540
EOPC-029_tumor	PR	198424	47	0.0002	A/T;43|C/G;4	A/T;0.9149|C/G;0.0851	ce457e6a-49b6-4b95-a6f9-d76bd8a791df/6b602381d91e1c2567eed329fff4ca63.bam	dc3332ea-a9bf-435b-90e5-c74b70e51fb8/7763f046e5db1018c1406a1dac7b5b02.bam	7648101	85	1e-05	3009	531
EOPC-03_tumor	PR	155041	33	0.0002	A/T;26|C/G;3|AC/GT;2|TA;1|GA/TC;1	A/T;0.7879|C/G;0.0909|AC/GT;0.0606|TA;0.0303|GA/TC;0.0303	828c524c-e355-45bf-9871-da5e804695ea/2fd274f7036fb0e94bf9df9379957bd5.bam	8620d193-fe22-48a0-9e7f-4b99d54aee34/a143d75b2c9a9c20be8a3da5d91cb15f.bam	6337244	44	1e-05	8862	2442
EOPC-030_tumor	PR	197994	72	0.0004	A/T;65|C/G;3|AC/GT;2|CA/TG;2	A/T;0.9028|C/G;0.0417|AC/GT;0.0278|CA/TG;0.0278	83742a75-81ee-45b4-a914-8b8585dd9522/315d6f22b17d9dfe37684fcebee86eb7.bam	c9098954-c6d9-459c-86c5-e7814bffab22/4779ccc4fd95fbf1dc3ba8f0a1944799.bam	7636776	121	2e-05	5621	808
EOPC-031_tumor	PR	198040	79	0.0004	A/T;74|AC/GT;1|AGAA/TTCT;1|TA;1|AG/CT;1|CA/TG;1	A/T;0.9367|AC/GT;0.0127|AGAA/TTCT;0.0127|TA;0.0127|AG/CT;0.0127|CA/TG;0.0127	d35c86dd-7c68-42f0-8ed8-4df7c2385098/949ded612d4a2713127d2640b33b60a0.bam	b64d5710-d3c4-455c-a364-fb569f7521d3/6ed154531afa06f13728aae1d69468a9.bam	7641824	125	2e-05	5524	806
EOPC-033_tumor	PR	191337	42	0.0002	A/T;31|AC/GT;4|CA/TG;3|AT;2|TA;1|C/G;1	A/T;0.7381|AC/GT;0.0952|CA/TG;0.0714|AT;0.0476|TA;0.0238|C/G;0.0238	eeaa9f21-ac55-4492-8bab-70e625272576/73de8341d05a5be312dbad844c60837e.bam	0021b6f0-96ec-4bb5-801c-b0696cf84d05/feee94a5108afc8026b6647294bd60ce.bam	7484375	59	1e-05	1996	903
EOPC-034_tumor_01	PR	197854	9	0	AC/GT;3|A/T;2|TA;2|CA/TG;2	AC/GT;0.3333|A/T;0.2222|TA;0.2222|CA/TG;0.2222	53e0dcdb-4394-44aa-a579-c74ec614fc89/f7f4bbaf8b4a063f38a4f2e560f1621d.bam	da4e262f-7f95-4502-b861-fabffd47f2d3/1d192400c75eb02c5ca906c2c290de3b.bam	7639614	9	0	1244	688
EOPC-034_tumor_04	PR	191806	18	0.0001	A/T;11|CA/TG;3|AC/GT;2|AT;2	A/T;0.6111|CA/TG;0.1667|AC/GT;0.1111|AT;0.1111	53e0dcdb-4394-44aa-a579-c74ec614fc89/f7f4bbaf8b4a063f38a4f2e560f1621d.bam	85b4b806-6a4b-4eec-b398-2eb873bd243b/50b12463d314eba76a1834258965a89a.bam	7511932	23	0	1716	821
EOPC-034_tumor_03	PR	196601	12	0.0001	CA/TG;5|A/T;3|AT;1|AC/GT;1|TA;1|AG/CT;1	CA/TG;0.4167|A/T;0.25|AT;0.0833|AC/GT;0.0833|TA;0.0833|AG/CT;0.0833	53e0dcdb-4394-44aa-a579-c74ec614fc89/f7f4bbaf8b4a063f38a4f2e560f1621d.bam	c9e1c0e7-e10f-41f1-83e4-f201cf01d40d/90228f6e766a87b3080a7d3a106d94b7.bam	7615860	16	0	1720	752
EOPC-034_tumor_05	PR	197851	16	0.0001	A/T;13|TA;2|CA/TG;1	A/T;0.8125|TA;0.125|CA/TG;0.0625	53e0dcdb-4394-44aa-a579-c74ec614fc89/f7f4bbaf8b4a063f38a4f2e560f1621d.bam	8d917085-c8f5-46a5-a0c3-7a1b26c3d610/7e4babba88e90e6bb63cda9d791c8637.bam	7637312	28	0	3318	831
EOPC-034_tumor_06	PR	197077	18	0.0001	A/T;12|CA/TG;3|AC/GT;1|AT;1|C/G;1	A/T;0.6667|CA/TG;0.1667|AC/GT;0.0556|AT;0.0556|C/G;0.0556	53e0dcdb-4394-44aa-a579-c74ec614fc89/f7f4bbaf8b4a063f38a4f2e560f1621d.bam	bf70cb27-eaab-4f83-adf1-349a47a6a669/fd94167f12ed1e89d7a49b9901963a8e.bam	7625823	40	1e-05	3644	676
EOPC-034_tumor_02	PR	197959	12	0.0001	A/T;4|CA/TG;4|AC/GT;1|AT;1|TA;1|AG/CT;1	A/T;0.3333|CA/TG;0.3333|AC/GT;0.0833|AT;0.0833|TA;0.0833|AG/CT;0.0833	53e0dcdb-4394-44aa-a579-c74ec614fc89/f7f4bbaf8b4a063f38a4f2e560f1621d.bam	199e8d90-de24-45a1-ba49-da41796033ea/751db139427013aa38df9a00769a793a.bam	7641698	13	0	721	637
EOPC-035_tumor_06	PR	190919	65	0.0003	A/T;53|CA/TG;5|C/G;3|AC/GT;2|TA;1|GA/TC;1	A/T;0.8154|CA/TG;0.0769|C/G;0.0462|AC/GT;0.0308|TA;0.0154|GA/TC;0.0154	bcd9ac1c-e1a8-48ee-996e-b367227e6a26/814fca053582d3e877784fe024977a06.bam	6aa5b913-230c-4e97-9e68-7017366bb784/dc78db755816055dc5fcf1071f4eab34.bam	7448458	83	1e-05	3926	947
EOPC-035_tumor_03	PR	193618	94	0.0005	A/T;88|CA/TG;3|TA;1|C/G;1|GA/TC;1	A/T;0.9362|CA/TG;0.0319|TA;0.0106|C/G;0.0106|GA/TC;0.0106	bcd9ac1c-e1a8-48ee-996e-b367227e6a26/814fca053582d3e877784fe024977a06.bam	2376d97c-d5f5-45eb-aaf9-6b91cc9fb44e/ab0154d60dd5d23774a0c6fefa563e81.bam	7545587	100	1e-05	3605	838
EOPC-035_tumor_02	PR	196745	78	0.0004	A/T;71|AC/GT;2|CA/TG;2|AT;1|C/G;1|GA/TC;1	A/T;0.9103|AC/GT;0.0256|CA/TG;0.0256|AT;0.0128|C/G;0.0128|GA/TC;0.0128	bcd9ac1c-e1a8-48ee-996e-b367227e6a26/814fca053582d3e877784fe024977a06.bam	cc62dafb-766b-468b-96a3-a5e72bbc05e3/459f962f8a993d875783f36d24093761.bam	7609807	85	1e-05	4053	883
EOPC-035_tumor_04	PR	192727	89	0.0005	A/T;80|AC/GT;2|GA/TC;2|AT;1|TA;1|AG/CT;1|CA/TG;1|C/G;1	A/T;0.8989|AC/GT;0.0225|GA/TC;0.0225|AT;0.0112|TA;0.0112|AG/CT;0.0112|CA/TG;0.0112|C/G;0.0112	bcd9ac1c-e1a8-48ee-996e-b367227e6a26/814fca053582d3e877784fe024977a06.bam	bcb8a3a0-4434-4a00-ac28-0a1869e1de14/16f2b6020b852c78e80e079edf6e9a00.bam	7506728	94	1e-05	3666	907
EOPC-035_tumor_01	PR	194944	65	0.0003	A/T;55|AC/GT;3|CA/TG;3|TA;2|C/G;1|GA/TC;1	A/T;0.8462|AC/GT;0.0462|CA/TG;0.0462|TA;0.0308|C/G;0.0154|GA/TC;0.0154	bcd9ac1c-e1a8-48ee-996e-b367227e6a26/814fca053582d3e877784fe024977a06.bam	ace11a93-6cda-47e9-8406-c501a1943717/b49e3f4e6412fa5d010d115fb78defc6.bam	7580760	72	1e-05	3827	796
EOPC-035_tumor_05	PR	189146	49	0.0003	A/T;41|AT;4|C/G;2|AC/GT;1|GA/TC;1	A/T;0.8367|AT;0.0816|C/G;0.0408|AC/GT;0.0204|GA/TC;0.0204	bcd9ac1c-e1a8-48ee-996e-b367227e6a26/814fca053582d3e877784fe024977a06.bam	15c48a14-5027-48a6-acfb-8f8ff8b9893c/beb74fdd336fa1a5cb98320c5d556cb2.bam	7370146	57	1e-05	3813	1049
EOPC-036_tumor_02	PR	198527	34	0.0002	A/T;31|AT;2|CA/TG;1	A/T;0.9118|AT;0.0588|CA/TG;0.0294	710d797c-ab74-4b0d-bb1c-5fb7ccad7842/256ce65faabf194ee34d301189df0943.bam	a65c9ae7-1ba7-4d4a-9430-7a44ae85bdf8/1b6a4625a9a82ee4200ac36140b669cd.bam	7649459	53	1e-05	3019	690
EOPC-036_tumor_05	PR	197355	15	0.0001	A/T;8|CA/TG;3|AC/GT;2|TA;1|C/G;1	A/T;0.5333|CA/TG;0.2|AC/GT;0.1333|TA;0.0667|C/G;0.0667	710d797c-ab74-4b0d-bb1c-5fb7ccad7842/256ce65faabf194ee34d301189df0943.bam	b0e4b42f-fd00-4fca-96e7-775b27722c92/4316952a8c99fa3b62a78ad26149b64a.bam	7620534	21	0	2378	431
EOPC-036_tumor_06	PR	197619	14	0.0001	A/T;10|AC/GT;2|AT;1|CA/TG;1	A/T;0.7143|AC/GT;0.1429|AT;0.0714|CA/TG;0.0714	710d797c-ab74-4b0d-bb1c-5fb7ccad7842/256ce65faabf194ee34d301189df0943.bam	6ff161bc-9df9-4013-ada4-7d4d1af254ab/c106132bd39bc34e535c6623009af5da.bam	7635736	18	0	2244	316
EOPC-036_tumor_01	PR	198279	42	0.0002	A/T;38|AT;2|AC/GT;1|C/G;1	A/T;0.9048|AT;0.0476|AC/GT;0.0238|C/G;0.0238	710d797c-ab74-4b0d-bb1c-5fb7ccad7842/256ce65faabf194ee34d301189df0943.bam	5b99ea2a-9cf2-4f6d-b4dc-b2d513feacef/ad8d08233b228939d9ecf8678844c381.bam	7645779	56	1e-05	2834	559
EOPC-036_tumor_03	PR	198539	1	0	AC/GT;1	AC/GT;1	710d797c-ab74-4b0d-bb1c-5fb7ccad7842/256ce65faabf194ee34d301189df0943.bam	32a6dca5-348a-40f7-b126-2257b886718b/199244474ea0818b20eab0a5c7a8603f.bam	7649655	1	0	1548	411
EOPC-037_tumor_04	PR	198424	43	0.0002	A/T;36|CA/TG;3|AC/GT;1|AT;1|AAAAC/GTTTT;1|C/G;1	A/T;0.8372|CA/TG;0.0698|AC/GT;0.0233|AT;0.0233|AAAAC/GTTTT;0.0233|C/G;0.0233	b3100edd-92bf-4d85-8d29-8284d0897e7d/053d5013662f111e4abf59194329fc6a.bam	3850f675-e2d5-49b7-9c32-24ec2a20b97a/f9527c09de092778d44d4d9779bc9e29.bam	7647728	48	1e-05	4140	462
EOPC-037_tumor_06	PR	186273	23	0.0001	A/T;22|CA/TG;1	A/T;0.9565|CA/TG;0.0435	b3100edd-92bf-4d85-8d29-8284d0897e7d/053d5013662f111e4abf59194329fc6a.bam	e1ec2227-a223-4469-a498-2e6241f4a349/a6b5d0372f5ffbb7d615c1b99b8d514c.bam	7098860	39	1e-05	3837	440
EOPC-037_tumor_05	PR	198458	4	0	A/T;2|CA/TG;1|C/G;1	A/T;0.5|CA/TG;0.25|C/G;0.25	b3100edd-92bf-4d85-8d29-8284d0897e7d/053d5013662f111e4abf59194329fc6a.bam	79ee25e4-ab81-4420-82e0-a3db7b9d623c/4a3d67e6cd2913a7a0c01c7c89616359.bam	7648086	5	0	2262	320
EOPC-037_tumor_02	PR	174487	43	0.0002	A/T;38|AC/GT;1|AAAAC/GTTTT;1|AG/CT;1|CA/TG;1|C/G;1	A/T;0.8837|AC/GT;0.0233|AAAAC/GTTTT;0.0233|AG/CT;0.0233|CA/TG;0.0233|C/G;0.0233	b3100edd-92bf-4d85-8d29-8284d0897e7d/053d5013662f111e4abf59194329fc6a.bam	701677cd-c3b7-45d5-a52e-7d6003bde95d/645d7cac7681bb83f73f9158853dc2dc.bam	6696640	51	1e-05	5332	835
EOPC-038_tumor_05	PR	198057	33	0.0002	A/T;24|CA/TG;4|AC/GT;3|TA;1|AG/CT;1	A/T;0.7273|CA/TG;0.1212|AC/GT;0.0909|TA;0.0303|AG/CT;0.0303	27f47f95-7b87-40f3-bc37-813c0e7d3004/6c64969f3dc95da97601c7b7359d58fc.bam	783e0fff-ce78-4a84-a32a-ed2c3f352c30/734f89ebfc16eb59d189ef459720b4ee.bam	7635377	36	0	2401	355
EOPC-038_tumor_01	PR	197804	17	0.0001	A/T;11|AC/GT;5|AT;1	A/T;0.6471|AC/GT;0.2941|AT;0.0588	27f47f95-7b87-40f3-bc37-813c0e7d3004/6c64969f3dc95da97601c7b7359d58fc.bam	8a6cc11c-4835-4dc3-8ca8-2bd63563d61a/b6e52e494497d86c0f37613417f39ba7.bam	7630100	26	0	1853	373
EOPC-038_tumor_06	PR	198484	29	0.0001	A/T;25|CA/TG;2|C/G;2	A/T;0.8621|CA/TG;0.069|C/G;0.069	27f47f95-7b87-40f3-bc37-813c0e7d3004/6c64969f3dc95da97601c7b7359d58fc.bam	1026ae31-fd1c-4141-b0dd-6ce558046a80/b9ca5ae0b555968a718997d3788a4ed7.bam	7648163	36	0	2487	269
EOPC-038_tumor_04	PR	198342	34	0.0002	A/T;27|AC/GT;3|CA/TG;3|GA/TC;1	A/T;0.7941|AC/GT;0.0882|CA/TG;0.0882|GA/TC;0.0294	27f47f95-7b87-40f3-bc37-813c0e7d3004/6c64969f3dc95da97601c7b7359d58fc.bam	785c07db-5f06-4fd5-b6d5-33164d6b8b4a/5b21728c5c01e95fe2b9b855a5771b23.bam	7644874	44	1e-05	2550	390
EOPC-038_tumor_03	PR	198448	28	0.0001	A/T;25|AC/GT;2|CA/TG;1	A/T;0.8929|AC/GT;0.0714|CA/TG;0.0357	27f47f95-7b87-40f3-bc37-813c0e7d3004/6c64969f3dc95da97601c7b7359d58fc.bam	b1d64ae2-f92c-43ae-b4c1-4066408fd492/9079a913048eaf4efe2523b31fd8a659.bam	7647475	39	1e-05	2410	388
EOPC-038_tumor_02	PR	198034	8	0	CA/TG;3|AC/GT;2|A/T;2|GA/TC;1	CA/TG;0.375|AC/GT;0.25|A/T;0.25|GA/TC;0.125	27f47f95-7b87-40f3-bc37-813c0e7d3004/6c64969f3dc95da97601c7b7359d58fc.bam	adb55a75-e631-444a-b232-17dee705e4c3/94c61359798e6cb2fcf5af19641e0bf4.bam	7637666	11	0	1470	320
EOPC-04_tumor	PR	170816	34	0.0002	A/T;31|CA/TG;2|C/G;1	A/T;0.9118|CA/TG;0.0588|C/G;0.0294	5aef3055-2ffc-46c4-a8a8-30e0c7086a17/c5d83d227a895dd8aee075f4cac4d6fe.bam	357c24e2-3025-46a6-a9eb-97bb29625812/4d29b40b62eed66000992857b415d448.bam	7069265	67	1e-05	4114	519
EOPC-040_tumor_01	PR	198529	5	0	AC/GT;2|TA;2|AT;1	AC/GT;0.4|TA;0.4|AT;0.2	3fbba039-f4dd-4f78-a117-e76cb55ea3c0/8fe54c0e40d5f7feacd9f0456661fca9.bam	55304785-8608-4503-a0b7-912ddd59c269/8637ee624d9ca0cf9742e52125283c8d.bam	7648723	5	0	1180	281
EOPC-040_tumor_02	PR	198561	4	0	AC/GT;2|A/T;2	AC/GT;0.5|A/T;0.5	3fbba039-f4dd-4f78-a117-e76cb55ea3c0/8fe54c0e40d5f7feacd9f0456661fca9.bam	c08f2e54-0f4b-4615-9dcc-0f13ad3a0e71/5122933499d95f5cc52360f7e12d0e2e.bam	7649335	6	0	673	209
EOPC-041_tumor_01	PR	196491	92	0.0005	A/T;87|CA/TG;2|C/G;2|TA;1	A/T;0.9457|CA/TG;0.0217|C/G;0.0217|TA;0.0109	5eede8be-374e-4533-9f42-d0cf973ac8f7/0e4b315ac46f24754184862b64835ffc.bam	36aa9194-6805-4a8e-9017-24a3c83fc326/d06479519d4b72279b79f9d9c33a24c7.bam	7616024	158	2e-05	5287	1410
EOPC-048_tumor_01	PR	198271	16	0.0001	A/T;12|AC/GT;1|TA;1|AG/CT;1|CA/TG;1	A/T;0.75|AC/GT;0.0625|TA;0.0625|AG/CT;0.0625|CA/TG;0.0625	13c62b84-462b-49df-a636-15767617a6a8/c68766a8e63952b457d2fe034d58486d.bam	f92eaea1-bacf-4dc1-b721-7d9b237f637f/1b5b7d1edf631517b9b222f7b7707441.bam	7645151	33	0	2293	636
EOPC-049_tumor_01	PR	198369	26	0.0001	A/T;22|AC/GT;2|CA/TG;1|C/G;1	A/T;0.8462|AC/GT;0.0769|CA/TG;0.0385|C/G;0.0385	01da8bb3-ecd7-4aee-b7e7-670b29d6627d/2cca6cbed132134e6dbc2a1664e35f1c.bam	88b0264a-47ac-4fbb-8e01-0c055134a674/8fbbf3ee2cbebc470903cf9fa8120dbb.bam	7644120	42	1e-05	1948	426
EOPC-05_tumor	PR	153969	22	0.0001	A/T;12|AC/GT;4|CA/TG;3|AT;1|TA;1|GA/TC;1	A/T;0.5455|AC/GT;0.1818|CA/TG;0.1364|AT;0.0455|TA;0.0455|GA/TC;0.0455	8349f996-e867-4468-8f12-9ee7844640ab/d6576921a09b7ec1c8e36927584564fe.bam	d48a8830-acf3-436e-99c4-163ac0a2b0a0/9d8572e851cbb590b92c621b96d17739.bam	6703558	39	1e-05	2469	615
EOPC-051_tumor_01	PR	198354	9	0	A/T;8|CA/TG;1	A/T;0.8889|CA/TG;0.1111	daca1aec-c68d-43c1-8112-5749dadd346d/26b42488cff8661999b35625b345fb6f.bam	42175e96-e0c2-4cc7-950d-43e46b6ec2ef/5113e6b9bb6c458bab80c59069a9d36e.bam	7646173	12	0	1395	367
EOPC-052_tumor_01	PR	198525	6	0	A/T;3|AC/GT;2|CA/TG;1	A/T;0.5|AC/GT;0.3333|CA/TG;0.1667	e62c9b15-7246-484d-8ac2-a6637d2404de/016411d09ddf692698bb688a75eff47b.bam	0067d208-1d21-45c4-881f-1878bcef75f8/3880412d7c4fa84c2ea6dd7dbd97a4b5.bam	7649295	8	0	1000	352
EOPC-053_tumor_01	PR	198510	7	0	A/T;5|CA/TG;1|C/G;1	A/T;0.7143|CA/TG;0.1429|C/G;0.1429	10ed3d50-36e2-4cfa-bb72-d1c721703ad8/7e3b33f7367ab70d39f2f4675ba29536.bam	7d5d87c6-bb9a-4a97-bcad-77ce514c9fa1/3029385852256d374050339b20e9b80a.bam	7648886	17	0	1759	354
EOPC-054_tumor_01	PR	198281	9	0	A/T;6|AC/GT;1|TA;1|C/G;1	A/T;0.6667|AC/GT;0.1111|TA;0.1111|C/G;0.1111	b1e2de81-462b-423f-a058-f304593f9b12/6be4d8f036ed16dc81df1fb0838af874.bam	c1f928bd-fb13-4cc5-bf93-3e374618de40/b412b610d01a61d9ae90504bc1253b8b.bam	7644020	14	0	1565	497
EOPC-056_tumor_01	PR	197499	8	0	AC/GT;2|A/T;2|CA/TG;2|AT;1|AG/CT;1	AC/GT;0.25|A/T;0.25|CA/TG;0.25|AT;0.125|AG/CT;0.125	bcc58b4e-cbf9-48cc-a6e4-d2a2ca5baf5d/9ac64c3078ca67448de5fffb7f60bffb.bam	b6d75997-2952-43e6-94a1-19d7fb4c908f/b7b384026521933e0a2b958645be0067.bam	7625420	11	0	1160	327
EOPC-057_tumor_01	PR	198150	9	0	A/T;7|AC/GT;1|CA/TG;1	A/T;0.7778|AC/GT;0.1111|CA/TG;0.1111	da3e1c4f-fd4d-4e1e-8c5b-37d83691cd9d/ecfb0f9dff71ad18e681a20345350cf6.bam	b1c49146-4ae6-4950-b53d-39ee19a3055f/f5cb08d2954f3113aa86bc3771137a5e.bam	7638361	19	0	1928	578
EOPC-058_tumor_01	PR	198441	5	0	CA/TG;2|AC/GT;1|A/T;1|GA/TC;1	CA/TG;0.4|AC/GT;0.2|A/T;0.2|GA/TC;0.2	2d39bd31-1197-4a23-adc4-6de6221cca1c/3e7952ee7e00960352b4e479a7a6fd7d.bam	f99595a2-beff-47e5-bd5c-b838971ac8ab/20d34e7ba34208861189bf7e966f7fba.bam	7645151	11	0	1037	379
EOPC-06_tumor	PR	174247	19	0.0001	A/T;15|CA/TG;2|AC/GT;1|C/G;1	A/T;0.7895|CA/TG;0.1053|AC/GT;0.0526|C/G;0.0526	505439cf-cf38-4f19-b9a0-a9306f6360af/32f49b244a8155867ad3d6466927bb20.bam	ea33c603-3d8c-4780-9791-c1ae5b1bb8db/8337e3e50f0d38c6aa05506279123546.bam	7051882	30	0	2496	546
EOPC-07_tumor	PR	135791	24	0.0002	A/T;20|AC/GT;2|CA/TG;1|C/G;1	A/T;0.8333|AC/GT;0.0833|CA/TG;0.0417|C/G;0.0417	3f07eb0c-11d4-4b51-a4b3-f28f45ce1ee0/182e8ce751e4a2b23277d085e5565735.bam	7879aa26-59d4-4a70-9de7-f68b0a5bc0a1/894c2cc18500d1002cdc97d658606e0d.bam	6274834	35	1e-05	2727	591
EOPC-08_tumor	PR	185378	16	0.0001	A/T;16	A/T;1	f4b4bcff-ecd3-4583-a935-ecad619d0a24/d09763a9138f64622a07e242afb50f51.bam	2c57b74c-7312-47e7-8620-b8741a4022d5/a67d1d64ffce4cf2202c20849a7af9eb.bam	7357706	25	0	2087	611
EOPC-09_tumor	PR	140482	23	0.0002	A/T;16|AC/GT;2|TA;2|CA/TG;2|C/G;1	A/T;0.6957|AC/GT;0.087|TA;0.087|CA/TG;0.087|C/G;0.0435	e18d9ad1-91c6-4e47-a8f7-669212bec284/7c37c379abcbffa71e7021965b6cb6c9.bam	ecb72001-4050-437a-acad-b6d95a90b160/2f68d926cbcd081b02621ec39e11ee5c.bam	6428606	37	1e-05	1930	407
EOPC-1010_tumor	PR	130428	10	0.0001	A/T;8|AC/GT;2	A/T;0.8|AC/GT;0.2	9ca1522c-a366-435d-800f-52b553cf78ef/3781a28ee6c1c5b2a85f67c429abd0a5.bam	86adfccf-a627-4de1-96c0-c51fe6709c46/2266c06a16529a4927e7432cfd7951fb.bam	6051106	10	0	647	427
SM-4AX84	ES	197713	833	0.0042	A/T;806|C/G;13|AC/GT;5|AT;2|AG/CT;2|CA/TG;2|TA;1|GAAA/TTTC;1|GA/TC;1	A/T;0.9676|C/G;0.0156|AC/GT;0.006|AT;0.0024|AG/CT;0.0024|CA/TG;0.0024|TA;0.0012|GAAA/TTTC;0.0012|GA/TC;0.0012	eb03efe2-76d9-4d02-b583-4d397bfd4643/8e40952aebdffa4db79c6694d3d0bd34.bam	03504817-facf-4e99-9f61-153f264be342/a290e711c72ff5177a4a4cd3df5f85cc.bam	7637643	1179	0.00015	32764	4635
LP6007591	ES	198473	1074	0.0054	A/T;1054|C/G;14|CA/TG;3|AT;2|GA/TC;1	A/T;0.9814|C/G;0.013|CA/TG;0.0028|AT;0.0019|GA/TC;0.0009	6b996361-4db5-444f-bc12-aa2075d22331/dd488be86f3463529775e7a2fb632f6d.bam	8b62045d-9493-40ce-8947-92ac9004717a/ee84c967997be3a2d88581deec6b928b.bam	7648002	1383	0.00018	65683	5839
LP6007504-DNA_A01	ES	198539	116	0.0006	A/T;115|AT;1	A/T;0.9914|AT;0.0086	59f49c72-e49f-42c3-83f2-9396e78cb8d1/16b1a5fc5a18d9a759ee0c7a6a8a327b.bam	3b4a1233-7fad-4359-b371-36029f8e1f8d/0d5b4eff9dc73d8869d2db08d2e3bb44.bam	7649239	153	2e-05	12120	1007
LP6007401-DNA_A01	ES	198505	595	0.003	A/T;581|C/G;8|CA/TG;3|AC/GT;1|TA;1|GA/TC;1	A/T;0.9765|C/G;0.0134|CA/TG;0.005|AC/GT;0.0017|TA;0.0017|GA/TC;0.0017	6616b32e-fc70-445b-9c6a-2443c971ef06/5a5d05ee2abd81a78493a42887e0d31c.bam	0ffc653d-1555-4cf4-ac0a-fe05ce0cbe7f/2f5dfdb35d764ef1cbc04dd24efc12c3.bam	7648675	861	0.00011	45309	3998
LP6007404-DNA_A01	ES	198145	552	0.0028	A/T;540|C/G;8|AT;2|AC/GT;1|CA/TG;1	A/T;0.9783|C/G;0.0145|AT;0.0036|AC/GT;0.0018|CA/TG;0.0018	4b1e0617-2708-4287-aae7-9e4a6ecda16c/066f8f871be1147c121d60aa552efad0.bam	e3412e0f-ed90-4b4e-812d-5f8f0a626c6c/fe3227b1a765e834361ea5722bbd3cfb.bam	7643474	705	9e-05	16014	2894
LP6007540-DNA_A01	ES	197126	807	0.0041	A/T;787|C/G;11|AC/GT;3|AT;3|AG/CT;1|CA/TG;1|ATTC/GAAT;1	A/T;0.9752|C/G;0.0136|AC/GT;0.0037|AT;0.0037|AG/CT;0.0012|CA/TG;0.0012|ATTC/GAAT;0.0012	b8ee37d2-ca7a-44be-a422-53695c725acf/0b7983f4d85911b7351f5136819c96f1.bam	6a7aded5-d62a-48d9-b72b-429389ce5418/22678cebb6115f6e83feb242d90e39e0.bam	7633153	1044	0.00014	22576	4420
LP6007544-DNA_A01	ES	198500	525	0.0026	A/T;512|C/G;6|CA/TG;3|AC/GT;2|TA;2	A/T;0.9752|C/G;0.0114|CA/TG;0.0057|AC/GT;0.0038|TA;0.0038	389dc101-d1c1-44ef-ac45-3af34576f188/0f42d242dc27ff36404dd459c30adcf4.bam	f29671e7-f79a-4213-9630-40293ce15348/e2d8c91de4566db465c92c8c960b4153.bam	7649146	682	9e-05	23534	2577
LP6007594	ES	198488	633	0.0032	A/T;617|AT;5|C/G;4|AC/GT;2|TA;2|AG/CT;1|CATC/GATG;1|GA/TC;1	A/T;0.9747|AT;0.0079|C/G;0.0063|AC/GT;0.0032|TA;0.0032|AG/CT;0.0016|CATC/GATG;0.0016|GA/TC;0.0016	f97c6322-9fcc-4987-b97e-8983f9231cb8/60fffaa8b037b480f8e1bbf690fe2212.bam	d0e43fb9-e3a9-42ba-bb44-80cd21feeda8/931205bde828ae2731cf37cb8444abb3.bam	7648793	847	0.00011	21749	3705
LP6007542-DNA_A01	ES	198448	987	0.005	A/T;966|C/G;10|CA/TG;4|AC/GT;3|GA/TC;2|AGAA/TTCT;1|TA;1	A/T;0.9787|C/G;0.0101|CA/TG;0.0041|AC/GT;0.003|GA/TC;0.002|AGAA/TTCT;0.001|TA;0.001	6d4e6101-4d85-4c54-98cd-2c0c04ea3c7f/18af94c9e9eb717dc0197f49f95eaa68.bam	2a8fd12c-f719-45b6-bf37-75befa939e29/abd09865a9fa40065ad10f6b5fe7215c.bam	7648224	1416	0.00019	34757	5470
LP6005409-DNA_E01	ES	198527	290	0.0015	A/T;283|C/G;4|CA/TG;2|AG/CT;1	A/T;0.9759|C/G;0.0138|CA/TG;0.0069|AG/CT;0.0034	8d45ef88-2428-4220-b862-790484ed9892/33ad005820e542772c8fbcda28dd9f58.bam	e9c9e89d-0a90-4017-bdfd-84b4fb61c02b/18b320f63f6c5dd2dd4e0c30c87a1ce9.bam	7649491	379	5e-05	12815	1815
SM-4AX85	ES	197242	345	0.0017	A/T;323|AC/GT;5|AG/CT;5|CA/TG;3|C/G;3|AT;2|TA;2|GA/TC;2	A/T;0.9362|AC/GT;0.0145|AG/CT;0.0145|CA/TG;0.0087|C/G;0.0087|AT;0.0058|TA;0.0058|GA/TC;0.0058	13456874-37ee-441a-8771-a1df7e409ac0/f345c8ec597356c06d80766374117084.bam	175b3370-593b-4284-b269-cff4dcbf3147/8e9327acb8e1cc667de3b7d0c3a35750.bam	7631030	462	6e-05	19150	4050
LP6007414-DNA_A02	ES	197809	1276	0.0065	A/T;1249|C/G;15|CA/TG;6|AT;3|AC/GT;2|ATTC/GAAT;1	A/T;0.9788|C/G;0.0118|CA/TG;0.0047|AT;0.0024|AC/GT;0.0016|ATTC/GAAT;0.0008	d7d23604-8e5b-4358-9f12-53bbe0287621/ae81abfb92eadf8156af0511d9e2c1f0.bam	8687aab8-31af-4e14-9c5e-91489ea17727/e9b948776f05bb1e5affc2d713511abe.bam	7640416	1563	0.0002	14025	5462
LP6007416-DNA_A01	ES	197605	981	0.005	A/T;959|C/G;9|CA/TG;6|GA/TC;4|AC/GT;2|TA;1	A/T;0.9776|C/G;0.0092|CA/TG;0.0061|GA/TC;0.0041|AC/GT;0.002|TA;0.001	88156c15-4ff8-4138-bb2f-62c2c4446fca/8fb84157d1bbd0c8b183ca93d11076d2.bam	45d2c910-09bd-4d92-81e3-b97ee86cd9c7/fdec7ac66f21e0127348adc913910e14.bam	7637468	1313	0.00017	22995	5176
LP6007597	ES	198369	605	0.003	A/T;587|C/G;9|TA;3|AT;2|CA/TG;2|AC/GT;1|GA/TC;1	A/T;0.9702|C/G;0.0149|TA;0.005|AT;0.0033|CA/TG;0.0033|AC/GT;0.0017|GA/TC;0.0017	3afbc958-e179-4189-9a26-b3837f5d5a93/bb333ba800836cecb5cae21f92481d1c.bam	7d79bef5-f9b7-4d65-9e40-07e5f6e7775e/c6ba18d6624f747c5da256debf458d52.bam	7647289	796	0.0001	43393	3396
LP6007538-DNA_A01	ES	196974	964	0.0049	A/T;939|C/G;12|CA/TG;5|AC/GT;4|TA;3|AAC/GTT;1	A/T;0.9741|C/G;0.0124|CA/TG;0.0052|AC/GT;0.0041|TA;0.0031|AAC/GTT;0.001	0750664e-9cd1-47c2-bf87-730c43674217/6bfa74b5b427608862dfd102f5a6e58d.bam	4931c3f3-f672-4add-9007-34e6e3424f44/10e5754ff94f5da74a0d04bd57c744b0.bam	7629187	1246	0.00016	30400	4977
LP6007420-DNA_A01	ES	197617	71	0.0004	A/T;69|CA/TG;1|C/G;1	A/T;0.9718|CA/TG;0.0141|C/G;0.0141	90c2be4f-3251-469c-8d42-b5c29d3b628f/351f45dc9e0dd2b786d0d24efc210932.bam	cd456753-a059-4d99-9457-c2c6544a345b/5b3bc69f8060efc4c44e13bcd1643365.bam	7637624	121	2e-05	60930	1487
LP6007422-DNA_A01	ES	196826	562	0.0029	A/T;545|C/G;10|AT;3|AC/GT;2|AG/CT;1|GA/TC;1	A/T;0.9698|C/G;0.0178|AT;0.0053|AC/GT;0.0036|AG/CT;0.0018|GA/TC;0.0018	6a6214ce-6cae-4acf-85f7-5bf6534d37ce/cd31d2688c6b0fe6674f9bb9293cc4ec.bam	92570870-bc3b-40c0-ab5f-25121d126a39/2fc8147dda3413c420334a3e396fdd21.bam	7623075	769	0.0001	17633	2686
LP6007424-DNA_A01	ES	195464	1140	0.0058	A/T;1125|C/G;7|AC/GT;2|AT;2|CA/TG;2|TA;1|AG/CT;1	A/T;0.9868|C/G;0.0061|AC/GT;0.0018|AT;0.0018|CA/TG;0.0018|TA;0.0009|AG/CT;0.0009	74d16ad6-7de9-472d-bc7c-94a954bec156/4b169b10b55df1e433f1b012c3412465.bam	a0c609ba-2055-473f-9858-70ff7fcc5e8b/a6cd09c2289b82b7cb512b5f58035c2a.bam	7602771	1449	0.00019	28711	6369
LP6007427-DNA_A01	ES	198314	1021	0.0051	A/T;1004|C/G;9|AC/GT;4|CA/TG;3|AT;1	A/T;0.9833|C/G;0.0088|AC/GT;0.0039|CA/TG;0.0029|AT;0.001	1e75385d-1c1e-4a50-841f-3b2f5766159b/d3080e4ebe9276d8f7101af286eba233.bam	1eb36468-c560-4041-b2d9-89c464425a6e/90d99626b73bd35673e41235374bd024.bam	7647848	1388	0.00018	86670	5037
LP6005690-DNA_D02	ES	198378	877	0.0044	A/T;854|C/G;11|AC/GT;4|TA;3|CA/TG;3|AAAC/GTTT;1|GA/TC;1	A/T;0.9738|C/G;0.0125|AC/GT;0.0046|TA;0.0034|CA/TG;0.0034|AAAC/GTTT;0.0011|GA/TC;0.0011	7ed788a2-67d8-46a1-9731-9bb0aa0ed368/133a017f363c34d54bc869fb4deba74f.bam	f7ccb441-976e-415a-b09d-ee81bb08de13/a89399ef0212863cb5d724f971977ca6.bam	7646980	1119	0.00015	44776	4440
LP6005334-DNA_E01	ES	198316	473	0.0024	A/T;460|C/G;5|AT;4|CA/TG;2|AC/GT;1|TA;1	A/T;0.9725|C/G;0.0106|AT;0.0085|CA/TG;0.0042|AC/GT;0.0021|TA;0.0021	908e7b7f-2453-499b-bc1b-234e805a80c6/ac33ec0a2a503f7589d2cce9428a4b46.bam	f3799cfb-5d82-41fc-97bc-26860998f980/d26b80c33e7bd28624a0d1ecf4eef0cc.bam	7647046	668	9e-05	22684	3265
LP6005500-DNA_A02	ES	198551	569	0.0029	A/T;557|C/G;4|CA/TG;2|GA/TC;2|ATG/CAT;1|AT;1|AC/GT;1|TA;1	A/T;0.9789|C/G;0.007|CA/TG;0.0035|GA/TC;0.0035|ATG/CAT;0.0018|AT;0.0018|AC/GT;0.0018|TA;0.0018	318cc24a-0388-4da4-a079-d25af082fbf9/138b736ebc1b4f123d90c87b9763ec46.bam	c0ccc76c-efcb-4577-9f94-ba8edd3714e0/3272dbc31566b8d6a5c8a336310227ef.bam	7649498	743	0.0001	30682	3388
LP6005334-DNA_A04	ES	197941	445	0.0022	A/T;428|C/G;7|AT;6|AC/GT;1|TA;1|AG/CT;1|CA/TG;1	A/T;0.9618|C/G;0.0157|AT;0.0135|AC/GT;0.0022|TA;0.0022|AG/CT;0.0022|CA/TG;0.0022	403b24cd-0a67-4cf7-96be-a8eab1cb9173/0cdeaa8bf1b4757e694bce73c750c6d6.bam	6a771265-122b-43e0-8483-06be76e5e5ab/7c2156017cc2c847013c4b87cfca8a8b.bam	7638177	598	8e-05	16908	2783
LP6005409-DNA_F01	ES	197834	747	0.0038	A/T;737|C/G;7|AC/GT;2|TA;1	A/T;0.9866|C/G;0.0094|AC/GT;0.0027|TA;0.0013	d6b0c11d-a30d-4d28-acf3-a8ec992a7d45/08f6c8561dcbc9c4e311cc79d87c73fa.bam	2167d627-7d28-41a1-b413-4c86a9ac2147/4ed4ba11e770408b47b2a18e37ab43fc.bam	7639678	970	0.00013	27177	3910
LP2000104-DNA_A01	ES	198453	513	0.0026	A/T;503|C/G;4|CA/TG;3|AC/GT;2|AT;1	A/T;0.9805|C/G;0.0078|CA/TG;0.0058|AC/GT;0.0039|AT;0.0019	efc12cd3-7f02-4b34-937e-2501498521bd/caac977aefdf4065b28da2c31904531f.bam	1c126967-57bf-4896-b9b8-15f6a5c0135a/c614e7eeadb59ac88c51de2f91221148.bam	7645455	655	9e-05	51133	3048
LP6005409-DNA_D02	ES	198155	955	0.0048	A/T;938|AC/GT;6|C/G;6|TA;4|AT;1	A/T;0.9822|AC/GT;0.0063|C/G;0.0063|TA;0.0042|AT;0.001	bac9ffc4-c217-43b2-a1a8-a80c9415d2ac/91c48557f40e5442961323ba84fac2c5.bam	7867d1aa-c1b4-41fc-9ff1-c45467ce0ad9/5bf4af94766a4eccee938ecfe433f40d.bam	7642803	1218	0.00016	43251	4394
LP6005500-DNA_D01	ES	198570	81	0.0004	A/T;81	A/T;1	b9be76fd-15c5-489d-a739-181af646f6fb/25aba69d609ec3959a1e472d64e25643.bam	93f1885d-c007-45ea-b48e-dc0b3eace705/507fe214d41a761fe62c5efa61991cd4.bam	7650054	115	2e-05	15239	908
LP6005500-DNA_D02	ES	198257	1120	0.0056	A/T;1093|C/G;13|AC/GT;4|TA;4|CA/TG;3|AT;1|AAAG/CTTT;1|GA/TC;1	A/T;0.9759|C/G;0.0116|AC/GT;0.0036|TA;0.0036|CA/TG;0.0027|AT;0.0009|AAAG/CTTT;0.0009|GA/TC;0.0009	f6d6fb42-afab-46ca-b654-f30cc0155f57/5c944c6a54ce756717f61a7cf3b86044.bam	0b29b6eb-8e48-400d-883e-3361ddf378b8/2fc9508f5c225ae651c5a7fe930f056a.bam	7645210	1488	0.00019	30474	4944
LP6005409-DNA_E02	ES	198543	284	0.0014	A/T;276|C/G;6|AC/GT;1|TA;1	A/T;0.9718|C/G;0.0211|AC/GT;0.0035|TA;0.0035	5c3c2e48-c5e3-4e7f-9786-74db3d63a930/f1bd01b566d1ab661e9b4e91087485e5.bam	8caa685d-f335-43e9-b5be-4f19b14f4046/ab3c9eaa6ef608830aa124808176460f.bam	7649497	410	5e-05	12369	1813
LP6005409-DNA_G03	ES	198474	200	0.001	A/T;197|C/G;2|TA;1	A/T;0.985|C/G;0.01|TA;0.005	948135a7-7abb-488e-b5ef-89cc5203e849/92fbec94284807bf60fc0dd9ca45c4d1.bam	34489787-8b89-44ab-a513-5aefb62ccc07/260b4b3ac77878293b707483482c37ac.bam	7648059	290	4e-05	32298	1982
LP6005409-DNA_H03	ES	198147	30	0.0002	A/T;28|AT;1|C/G;1	A/T;0.9333|AT;0.0333|C/G;0.0333	b364da0c-19dc-4d6d-8375-bcba9a1c4eda/40416d2bdc893b54ead778cdd5c1177f.bam	d877d96c-66a4-4290-88c5-da440c58d9c7/bedc55cd2fe1d2872cccc95f4bf9d17e.bam	7640744	36	0	15548	1098
SM-4B296	ES	195381	773	0.004	A/T;745|CA/TG;8|C/G;6|AT;5|AG/CT;4|AC/GT;2|TA;2|GA/TC;1	A/T;0.9638|CA/TG;0.0103|C/G;0.0078|AT;0.0065|AG/CT;0.0052|AC/GT;0.0026|TA;0.0026|GA/TC;0.0013	685feb5c-2f35-4e42-bbd1-1c5869880d51/0d92673a261e7374573796898c7136fc.bam	2ca7ede6-55fb-42b9-9793-910bfa03b309/e4adf0d42db04c1e92b4f351b5ef414c.bam	7587752	1095	0.00014	62183	6812
LP6005500-DNA_G03	ES	198325	616	0.0031	A/T;597|C/G;7|AC/GT;4|AT;3|AG/CT;2|TA;1|CA/TG;1|GA/TC;1	A/T;0.9692|C/G;0.0114|AC/GT;0.0065|AT;0.0049|AG/CT;0.0032|TA;0.0016|CA/TG;0.0016|GA/TC;0.0016	c8ebac3d-6802-462b-a26b-637fe3aa3a9a/a93e5e3cf822aed9dcf4360b545621e8.bam	de60e3ab-0822-4094-83c2-b243739e47f5/af71d29022bc62b7a5afd6bb8352645e.bam	7644132	804	0.00011	27726	3153
LP6005500-DNA_B03	ES	198045	215	0.0011	A/T;208|C/G;5|AC/GT;1|GA/TC;1	A/T;0.9674|C/G;0.0233|AC/GT;0.0047|GA/TC;0.0047	a23ccb74-ef1c-4134-8397-35380e8e9e08/c1e38ed97501041d0e238defb5e53c79.bam	e2a7e454-734d-4cf0-8a48-3d7d5cf1d4a0/1bace76d975be5d2b1d6dc18856d29e1.bam	7638818	269	4e-05	24409	1416
LP6005500-DNA_C03	ES	198074	859	0.0043	A/T;826|C/G;17|AC/GT;8|TA;3|AT;2|AG/CT;1|CA/TG;1|GA/TC;1	A/T;0.9616|C/G;0.0198|AC/GT;0.0093|TA;0.0035|AT;0.0023|AG/CT;0.0012|CA/TG;0.0012|GA/TC;0.0012	f4996258-8a7b-4091-9991-61fbd58e93a0/b6b1543558f27791a16d681a5ae21940.bam	eea32957-d464-415c-886e-c18cc2807765/df4b26ce8210b8ad42f9ed2accc880a0.bam	7641280	1124	0.00015	28046	4144
SM-4B295	ES	198320	312	0.0016	A/T;300|C/G;3|AC/GT;2|AG/CT;2|CA/TG;2|GA/TC;2|TA;1	A/T;0.9615|C/G;0.0096|AC/GT;0.0064|AG/CT;0.0064|CA/TG;0.0064|GA/TC;0.0064|TA;0.0032	a2f5530e-68ac-4935-8ee4-833fa09e4913/bda62ec4751df6c7d09270377d6f39e3.bam	2fb5c74d-3178-4124-9221-2d70379afc91/d0ac3315f713a78b19b8f7d7eed839b3.bam	7645051	440	6e-05	36475	3788
LP2000108-DNA_A01	ES	198410	224	0.0011	A/T;217|C/G;2|AC/GT;1|AT;1|TA;1|CA/TG;1|GA/TC;1	A/T;0.9688|C/G;0.0089|AC/GT;0.0045|AT;0.0045|TA;0.0045|CA/TG;0.0045|GA/TC;0.0045	b58a201d-3c1c-4511-9b26-73a5d8b75665/74c9f56cd9b5b3454760e4507496e755.bam	c041db67-cb4e-4849-bb35-74ce9f8adc85/74475d452e5ca9eaee00671529f1d22a.bam	7645465	313	4e-05	10863	1912
LP6005935-DNA_D01	ES	196193	797	0.0041	A/T;777|C/G;8|AT;4|CA/TG;4|AC/GT;1|AG/CT;1|AACA/TGTT;1|GA/TC;1	A/T;0.9749|C/G;0.01|AT;0.005|CA/TG;0.005|AC/GT;0.0013|AG/CT;0.0013|AACA/TGTT;0.0013|GA/TC;0.0013	90f6477d-f246-4fcf-bda2-346b636f9c06/a7a2c895af68c5736d8abb49dc7313e7.bam	3b2095fa-ca4c-4938-95e3-2628447682fb/3756a5bb0047504a87838271674b6424.bam	7580499	1061	0.00014	44776	4070
LP6005690-DNA_F02	ES	198474	35	0.0002	A/T;35	A/T;1	555fe7f2-029b-47b0-8aa6-30a594da3d9a/67cee1198040195bb2cc0738f214b681.bam	957d50f8-b00b-4e34-94a9-4efe177f07e5/d68c213a0337da50a946bce580f49ee6.bam	7648458	50	1e-05	48275	1302
LP6005690-DNA_E02	ES	198548	1	0	C/G;1	C/G;1	6e575a3b-86bd-46a8-a3ee-ae0878764178/85c8290aa69210e7b1d244b85c8dd64e.bam	1cd88365-45fb-47a5-a662-0a1056a192c5/5818499818533772c63f1c0e94767950.bam	7649595	1	0	860	344
LP6005935-DNA_E01	ES	196554	1108	0.0056	A/T;1071|C/G;20|AC/GT;7|AT;5|CA/TG;3|AG/CT;2	A/T;0.9666|C/G;0.0181|AC/GT;0.0063|AT;0.0045|CA/TG;0.0027|AG/CT;0.0018	e5db6d63-3e9b-400e-9cce-8eee015281d8/4cbfc081f5bd7d572e5c9bf0090c0426.bam	c9c99cc0-4a5e-41e6-b33c-0b314a1e0d31/17d0164ba75254a66877eb430bef5ab3.bam	7584111	1479	0.0002	49426	5232
LP6005935-DNA_F01	ES	196829	119	0.0006	A/T;116|C/G;3	A/T;0.9748|C/G;0.0252	48f2432b-4a59-43b5-a372-0addffbdf5ca/f86245b83cda3ee1a83f40caafd6d8b4.bam	251a1f7d-b2b8-4d26-860e-717099f8b47c/6681a3b45b0975d2599d48a85149ba3d.bam	7596485	184	2e-05	12156	1165
LP6005935-DNA_H01	ES	198356	1076	0.0054	A/T;1049|C/G;9|AC/GT;5|AT;4|TA;2|CA/TG;2|GA/TC;2|AG/CT;1|AAAC/GTTT;1|AAC/GTT;1	A/T;0.9749|C/G;0.0084|AC/GT;0.0046|AT;0.0037|TA;0.0019|CA/TG;0.0019|GA/TC;0.0019|AG/CT;0.0009|AAAC/GTTT;0.0009|AAC/GTT;0.0009	e82253a5-7a18-4f47-bf2e-a25abf816fc2/3452fdece33fe81a476c1b1e47b2e53b.bam	155ff477-c7b9-4f07-b17b-a25678b1ed60/d6250862d02f9a7edf281102cdccf83c.bam	7641939	1419	0.00019	38027	5109
LP6005409-DNA_F02	ES	198442	515	0.0026	A/T;502|C/G;6|CA/TG;3|GA/TC;2|AT;1|AG/CT;1	A/T;0.9748|C/G;0.0117|CA/TG;0.0058|GA/TC;0.0039|AT;0.0019|AG/CT;0.0019	749ee621-c14c-4500-9bc3-8658c3e7076f/54e17c4435f6b73a956a50e70110ce0f.bam	7f652539-ffdf-483b-bc00-9c11e178476c/d7f0d01e30c08ad5a53b08ad3f9891c6.bam	7647848	654	9e-05	19128	2822
LP6007512-DNA_A01	ES	198530	1068	0.0054	A/T;1044|C/G;17|CA/TG;3|AC/GT;2|AT;1|TA;1	A/T;0.9775|C/G;0.0159|CA/TG;0.0028|AC/GT;0.0019|AT;0.0009|TA;0.0009	6f134d5f-003d-4216-b96d-bc47702a5e94/d4ef5cdff5c63275ba7ea6deecb943db.bam	55bd0a3d-c41d-4664-9ca7-c535b212cc39/e7c4d1e0da07ceddc34215fd998cb9b0.bam	7648956	1365	0.00018	29528	5181
LP6005500-DNA_A01	ES	198404	443	0.0022	A/T;434|C/G;5|CA/TG;2|AC/GT;1|AT;1	A/T;0.9797|C/G;0.0113|CA/TG;0.0045|AC/GT;0.0023|AT;0.0023	cc0a8a9c-7024-46e1-a2df-aac185209697/ab3c08eafbabda9ebc1ed4b536e894b3.bam	4526cdd8-3eb7-4fda-84c3-ebcaf6f5e316/d073e37c97d855da5783148477977ec5.bam	7647866	579	8e-05	17142	3229
LP6005500-DNA_H02	ES	198143	687	0.0035	A/T;681|AC/GT;2|C/G;2|TA;1|CA/TG;1	A/T;0.9913|AC/GT;0.0029|C/G;0.0029|TA;0.0015|CA/TG;0.0015	a1dfaec1-cc4c-49f2-a052-51bc220cfb41/b2b3bc373a2835d5a130dc5e50c3749a.bam	2463354b-dd5e-49e2-abcb-6698d831368a/97e6ae058406132d95f298fd9766478c.bam	7643687	897	0.00012	20369	3477
LP6005690-DNA_D01	ES	198473	1308	0.0066	A/T;1281|C/G;15|CA/TG;4|AC/GT;3|AT;2|TA;2|GA/TC;1	A/T;0.9794|C/G;0.0115|CA/TG;0.0031|AC/GT;0.0023|AT;0.0015|TA;0.0015|GA/TC;0.0008	3c3fdec4-ffd4-4928-acc7-87e4cd707b94/f6abaa6b0c8bdb07ffc1e49d48202d40.bam	f7d08356-987d-4617-947f-1948033a84b9/8e55753867a02048046f6b250021fe8b.bam	7647800	1617	0.00021	20308	5785
SS6003119	ES	197491	89	0.0005	A/T;81|C/G;5|AC/GT;2|CA/TG;1	A/T;0.9101|C/G;0.0562|AC/GT;0.0225|CA/TG;0.0112	7b994104-64b6-421f-83da-86bf2b70c991/c091d05b530076ae2ec21d3016bc3883.bam	39f09c5a-1351-46d6-a4eb-65a1fcdf9f23/d42c5f83c74276a84f9ba4f2e991e563.bam	7629437	157	2e-05	8084	1314
SS6003117	ES	198511	88	0.0004	A/T;83|AC/GT;2|AG/CT;1|CA/TG;1|C/G;1	A/T;0.9432|AC/GT;0.0227|AG/CT;0.0114|CA/TG;0.0114|C/G;0.0114	a7da3429-6cf3-4cd4-b430-d8a7c69c4ecc/ebda9276b95de961d9566de5c0df080d.bam	1d533670-0dc5-4380-afc7-db78b6ed4f0d/d8faa1b0d77cab4bbb62e4d8f4bf7874.bam	7649028	145	2e-05	12630	1083
SS6003149	ES	191762	813	0.0042	A/T;804|C/G;3|GA/TC;2|AC/GT;1|AT;1|TA;1|CA/TG;1	A/T;0.9889|C/G;0.0037|GA/TC;0.0025|AC/GT;0.0012|AT;0.0012|TA;0.0012|CA/TG;0.0012	5c2e205f-be1c-4788-8901-a0c40a9cc203/6a2053d89c7e016b5eb3728bff5eb258.bam	2a8b5dc5-7d9f-42d0-b98d-20b069e85ad5/fee8422013f0fcaed92612dd9be52c6a.bam	7373429	1118	0.00015	80993	3881
SS6003109	ES	198562	326	0.0016	A/T;319|C/G;3|CA/TG;2|AC/GT;1|AG/CT;1	A/T;0.9785|C/G;0.0092|CA/TG;0.0061|AC/GT;0.0031|AG/CT;0.0031	4e04d680-da1d-497f-988a-69508642b617/8f461297ccfbdd7ce6dc468b3b3ed6a7.bam	c375d937-79f8-4c56-a3bc-844f7bc668a7/39568c38b7848877cc7cd29f699320af.bam	7649669	484	6e-05	26017	2063
SS6003111	ES	198569	572	0.0029	A/T;552|C/G;11|TA;2|AG/CT;2|CA/TG;2|AC/GT;1|AT;1|AAAT/ATTT;1	A/T;0.965|C/G;0.0192|TA;0.0035|AG/CT;0.0035|CA/TG;0.0035|AC/GT;0.0017|AT;0.0017|AAAT/ATTT;0.0017	15d0a648-3637-499f-b82f-57a8d3b64a91/41c9ee902e45fd904a88192d35d935a8.bam	9084e2e1-c14a-487a-9ead-a847526b55a6/837f6c3f8d4c60a3193e39ffe069ea9f.bam	7649835	826	0.00011	28106	3359
SS6003113	ES	198504	60	0.0003	A/T;58|C/G;2	A/T;0.9667|C/G;0.0333	572706c4-d1b2-438d-95d8-bf07ec31b827/408bb34a79d24404845cc07574321fa4.bam	27cd3cee-d7ab-4a30-aa5e-bc6b45c0da4a/3c54785645c4b1e1c9d334e9da4dff78.bam	7649098	103	1e-05	20769	858
LP6005690-DNA_B03	ES	198532	887	0.0045	A/T;863|C/G;15|CA/TG;4|AC/GT;2|AT;2|AG/CT;1	A/T;0.9729|C/G;0.0169|CA/TG;0.0045|AC/GT;0.0023|AT;0.0023|AG/CT;0.0011	25691ae5-7091-4315-a1ce-8dd500575ca3/53bf14aaf1c3adc718d8b505f4e46331.bam	3c128ac0-6c6a-4977-aeae-e4d2c0fb912c/904342a8883a6c61874edc95a9a97cf5.bam	7649099	1115	0.00015	35271	3849
LP6005500-DNA_H01	ES	198493	601	0.003	A/T;585|C/G;9|AT;2|TA;2|CA/TG;2|AC/GT;1	A/T;0.9734|C/G;0.015|AT;0.0033|TA;0.0033|CA/TG;0.0033|AC/GT;0.0017	82cd3972-6632-4f33-981f-99d657053551/b81de293691fe2b55a13a9bc72fb77c9.bam	cb13a59c-7c77-4d39-aab1-a9fe6ce9a923/34f750e775facce4468828b9f3a94a54.bam	7648944	926	0.00012	24185	2907
LP6005500-DNA_G01	ES	198492	550	0.0028	A/T;537|C/G;7|AC/GT;3|CA/TG;3	A/T;0.9764|C/G;0.0127|AC/GT;0.0055|CA/TG;0.0055	c405d92c-23fc-41b1-a4c6-bd48d2048d71/3aeec71296e1dbe3458481c920cf1b8a.bam	3e5c2340-7eaa-4984-a1f0-75da3828fcd7/2e854733660d3a0d141f77c5204a3cb6.bam	7648282	754	0.0001	50905	3360
LP6005409-DNA_F03	ES	198380	44	0.0002	A/T;41|C/G;2|AT;1	A/T;0.9318|C/G;0.0455|AT;0.0227	29e4cff3-93ad-4cd0-8d17-22d86564d6b2/9764d6e93fd5a38ebc35263ef88f3f67.bam	4a8c59ac-32e0-4f9d-ba35-ae1bd256c0e1/08b5e10caa8aae97aa54fc4ad360fd44.bam	7647780	77	1e-05	7938	809
LP6005500-DNA_B01	ES	198440	634	0.0032	A/T;621|C/G;7|AG/CT;2|AC/GT;1|AT;1|CA/TG;1|GA/TC;1	A/T;0.9795|C/G;0.011|AG/CT;0.0032|AC/GT;0.0016|AT;0.0016|CA/TG;0.0016|GA/TC;0.0016	199b3a6f-a45e-4339-a3b3-79616a4a1c03/85df9b8f54db020e20317e55e30a4b30.bam	cfbe4a1e-5d7d-434c-86b8-0faf775eced1/700af95816b32d4fc5e2091b5f01115d.bam	7647659	797	0.0001	19711	3011
SM-4AX87	ES	197976	57	0.0003	A/T;55|AC/GT;1|AG/CT;1	A/T;0.9649|AC/GT;0.0175|AG/CT;0.0175	ca87231f-cfdf-459c-bc20-8bc79ba3db19/c5809ce42d09910878e7e2a60be7024f.bam	4d696c16-be57-4a81-89e5-3d184341c796/61c5eeae092659949b20354fdaae07d8.bam	7640196	61	1e-05	8475	2977
SM-4AX86	ES	198485	89	0.0004	A/T;85|C/G;2|AC/GT;1|GA/TC;1	A/T;0.9551|C/G;0.0225|AC/GT;0.0112|GA/TC;0.0112	4421cdcc-1cdc-4b7c-b68b-8cda65a3f93e/5e608f0b664187403393eff07f736f5b.bam	e7d24939-d63e-46a8-a84e-721790f4b6d4/52e9c65df5950efde5a03d89ecfbbe0a.bam	7648032	109	1e-05	27398	2364
LP6005690-DNA_E01	ES	196872	2117	0.0108	A/T;2081|C/G;21|AC/GT;6|AT;4|CA/TG;2|TA;1|AG/CT;1|GA/TC;1	A/T;0.983|C/G;0.0099|AC/GT;0.0028|AT;0.0019|CA/TG;0.0009|TA;0.0005|AG/CT;0.0005|GA/TC;0.0005	415bdd88-8474-4e44-9888-d947a868db45/c26b61ad608d146770b6abf8351a980a.bam	914da15a-1729-413f-b30b-95a0449878e1/cbbba74222441fa3ca729518f0aa851d.bam	7616739	2602	0.00034	39207	8907
LP6005500-DNA_D03	ES	198501	928	0.0047	A/T;910|C/G;7|AC/GT;6|CA/TG;3|AT;1|TA;1	A/T;0.9806|C/G;0.0075|AC/GT;0.0065|CA/TG;0.0032|AT;0.0011|TA;0.0011	45771bde-d4b8-444c-b72c-64089b0aea9c/17e6368cb4ae6ae3ac0ca12e20c90dd4.bam	8d2daad6-ad5a-4c1d-9e3b-e2b08b669e90/29a3f24332c88d064a5d658aad809003.bam	7648564	1224	0.00016	20580	4536
LP6005500-DNA_E03	ES	198425	1358	0.0068	A/T;1333|C/G;12|AT;5|AC/GT;2|ATG/CAT;1|TA;1|AG/CT;1|CA/TG;1|ATTC/GAAT;1|GA/TC;1	A/T;0.9816|C/G;0.0088|AT;0.0037|AC/GT;0.0015|ATG/CAT;0.0007|TA;0.0007|AG/CT;0.0007|CA/TG;0.0007|ATTC/GAAT;0.0007|GA/TC;0.0007	b4587aa4-5267-49fc-91a4-317f51d3b20b/27ed80c3b3e851cdb16492e38eea8ed7.bam	0530bbac-422e-410c-b426-7d6c613acbb7/06aa83c6bd0135a70071a8fb9fadcea3.bam	7644573	1789	0.00023	86301	5933
LP6005500-DNA_H03	ES	198349	1226	0.0062	A/T;1195|C/G;14|AT;4|AC/GT;4|CA/TG;4|TA;2|AG/CT;2|GA/TC;1	A/T;0.9747|C/G;0.0114|AT;0.0033|AC/GT;0.0033|CA/TG;0.0033|TA;0.0016|AG/CT;0.0016|GA/TC;0.0008	4b9c0467-bc2b-4b16-a57a-8da61fc96156/c40f28624b7bb553ee7188915c83907d.bam	727e9318-1d2b-4990-8861-8f03902b6f87/5ec441045ceb71e3c6ae032c22f986df.bam	7643911	1642	0.00021	25799	6045
LP6005690-DNA_A02	ES	198332	653	0.0033	A/T;642|C/G;7|AC/GT;1|TA;1|AACA/TGTT;1|GA/TC;1	A/T;0.9832|C/G;0.0107|AC/GT;0.0015|TA;0.0015|AACA/TGTT;0.0015|GA/TC;0.0015	367eb2ad-3933-4cac-ab2f-3708acc636dd/28bcfef28146f4b23291eea7f9b0fa4c.bam	2bbf1763-2401-44d2-98a7-478f5c95f371/006cdcd42d55e07a2fd1ad2d31dd1a87.bam	7646286	865	0.00011	15850	2859
LP6005690-DNA_C02	ES	198557	1020	0.0051	A/T;997|C/G;10|AT;5|CA/TG;4|AC/GT;2|TA;1|AG/CT;1	A/T;0.9775|C/G;0.0098|AT;0.0049|CA/TG;0.0039|AC/GT;0.002|TA;0.001|AG/CT;0.001	b07fd886-9b8c-44ee-8549-f875b5ed069c/c4409ff03ef47fa22dac0c74d5429f5d.bam	77dca527-7599-44a8-bee2-3add4d406e7b/38ee0240debcdd0e2f5c8ec65f146af3.bam	7649688	1287	0.00017	19016	3876
LP6005690-DNA_C01	ES	198538	575	0.0029	A/T;562|C/G;4|AT;3|CA/TG;2|AC/GT;1|TA;1|AG/CT;1|AAC/GTT;1	A/T;0.9774|C/G;0.007|AT;0.0052|CA/TG;0.0035|AC/GT;0.0017|TA;0.0017|AG/CT;0.0017|AAC/GTT;0.0017	8ee3278a-d9d7-4d02-bd87-5a7f55365260/ad33c561c15b7af26a9cdbd945adc273.bam	7aa378d7-2cb4-449a-8402-6f10ec5abacd/b10676570e484ad737329345146b6906.bam	7649350	709	9e-05	12262	2590
LP6005690-DNA_B02	ES	198372	2256	0.0114	A/T;2202|C/G;27|AC/GT;7|TA;6|CA/TG;5|AT;3|AG/CT;3|GA/TC;3	A/T;0.9761|C/G;0.012|AC/GT;0.0031|TA;0.0027|CA/TG;0.0022|AT;0.0013|AG/CT;0.0013|GA/TC;0.0013	7e9c85db-cbe9-42c6-9a7d-d46473addea5/1ad29258baca5c11c468d3748f263bd3.bam	f6712653-3e8b-4e2c-beb1-e32ea542445c/7ec671051c13c07911105396540c7223.bam	7647064	2830	0.00037	64121	8979
LP6005935-DNA_F02	ES	197920	986	0.005	A/T;966|C/G;12|AT;4|AC/GT;3|GA/TC;1	A/T;0.9797|C/G;0.0122|AT;0.0041|AC/GT;0.003|GA/TC;0.001	e6002822-7f48-40e8-8ce9-88fb6030f6d0/92a851f8eaa9edd5750f7605460eca16.bam	d5e3cf62-1192-48ed-9d56-dfde401b35e8/81d1bbace3d0a134ed2f820c75503147.bam	7632197	1293	0.00017	115603	3925
LP6007430-DNA_A01	ES	198169	1193	0.006	A/T;1162|C/G;14|CA/TG;5|AG/CT;4|AC/GT;3|TA;2|AACAA/TTGTT;1|GA/TC;1|AAC/GTT;1	A/T;0.974|C/G;0.0117|CA/TG;0.0042|AG/CT;0.0034|AC/GT;0.0025|TA;0.0017|AACAA/TTGTT;0.0008|GA/TC;0.0008|AAC/GTT;0.0008	c7ea07d8-026d-4a9b-bbf4-1b8553bb2217/0b472eda970ba735ff7ce47f09f43def.bam	1ecce870-cdb8-4a86-a5af-ece60eb9636e/0d2e46185b6dc8be30492a81abc66147.bam	7646240	1580	0.00021	25485	5649
LP6007436-DNA_A01	ES	198482	284	0.0014	A/T;278|C/G;4|AC/GT;1|AACAA/TTGTT;1	A/T;0.9789|C/G;0.0141|AC/GT;0.0035|AACAA/TTGTT;0.0035	e6d4bfbd-3990-4fc6-ab5c-a4e06a1b2890/5e6dd7316fb69b8565ca9df3fe0349d4.bam	7e40ac07-6e9a-47c6-81e9-31f2907e52df/0a250b03103541ef9137514aa0ac5af0.bam	7648921	384	5e-05	45798	2419
LP6007438-DNA_A01	ES	198376	209	0.0011	A/T;203|C/G;5|AT;1	A/T;0.9713|C/G;0.0239|AT;0.0048	7aebb1e0-6ea8-44b6-b979-aa96265d70bc/868c84daeea41793c32761baab9848ff.bam	d5f94e27-09d5-4f7b-b36f-9e92ee2f59ce/513bbeece195b52f92097da6e8b83439.bam	7648296	285	4e-05	11725	1370
LP6005334-DNA_G01	ES	198446	750	0.0038	A/T;737|AT;3|C/G;3|AC/GT;2|TA;2|CA/TG;2|ATC/GAT;1	A/T;0.9827|AT;0.004|C/G;0.004|AC/GT;0.0027|TA;0.0027|CA/TG;0.0027|ATC/GAT;0.0013	ef187b8d-c0cb-408e-ab79-06c77767f9ee/f5be92968f9f7fd65d2146c06f29779b.bam	dea58956-b336-4b04-9bf4-84b6360ba036/492caa55c486aaf5c37fea1221c1c95f.bam	7648491	998	0.00013	38519	4015
LP6005334-DNA_H01	ES	198452	2083	0.0105	A/T;2043|C/G;16|AC/GT;9|CA/TG;5|TA;3|AT;2|AG/CT;2|ACA/TGT;1|AACAA/TTGTT;1|GA/TC;1	A/T;0.9808|C/G;0.0077|AC/GT;0.0043|CA/TG;0.0024|TA;0.0014|AT;0.001|AG/CT;0.001|ACA/TGT;0.0005|AACAA/TTGTT;0.0005|GA/TC;0.0005	fa9fc41d-7b27-43d5-8c14-4138aa561c5b/15c1dff43b7a10b72f9c600b082d957c.bam	0d8605fc-6510-4b3d-91e9-11c7c771d2f3/ab4cd5b95392cd1c35b78659af1afaf4.bam	7647502	2631	0.00034	33913	8993
LP6005500-DNA_B02	ES	198319	2605	0.0131	A/T;2574|C/G;14|AT;4|CA/TG;4|AC/GT;3|TA;2|AG/CT;2|CAA/TTG;1|GA/TC;1	A/T;0.9881|C/G;0.0054|AT;0.0015|CA/TG;0.0015|AC/GT;0.0012|TA;0.0008|AG/CT;0.0008|CAA/TTG;0.0004|GA/TC;0.0004	69a4beb0-7b55-4c0e-a416-b870662c12c1/81eda88c942f0f4a602826ff1afc501e.bam	f64ba1bf-0964-42e7-a877-f51d0ed65eea/0337efea9b59b88f804ea384c356377c.bam	7645013	3178	0.00042	39775	10128
LP6005334-DNA_C03	ES	198497	1102	0.0056	A/T;1088|C/G;8|AT;3|AG/CT;2|TA;1	A/T;0.9873|C/G;0.0073|AT;0.0027|AG/CT;0.0018|TA;0.0009	c9c8fa5f-c551-4565-ba3d-43ceddc2fdeb/fdcb1bd7cffca69d15383ca9566c58e0.bam	ce8fd3aa-31a0-441f-ae4a-8e3114942f16/7875b5196f6b8b52847f99bf370aada0.bam	7649278	1338	0.00017	20578	3820
LP6007600	ES	197909	19	0.0001	A/T;17|AC/GT;1|C/G;1	A/T;0.8947|AC/GT;0.0526|C/G;0.0526	1c125f87-537c-4dcf-8a74-11785df2507d/5b2243e4bcd16e58f9ad33274d3ca06f.bam	ddf189ed-3e35-49e9-be6f-9e035d8f01f8/212c34bd65434db34e6dbed057956545.bam	7639742	28	0	8760	1044
LP6005409-DNA_A02	ES	198036	113	0.0006	A/T;111|TA;1|C/G;1	A/T;0.9823|TA;0.0088|C/G;0.0088	b5178ce3-bb25-4893-824a-58142dae29a3/53a8e45206eb746320be9a7c6fc25f19.bam	eb7fb116-8df1-472c-856b-34adb0f20e5f/1b680787b81a2fcba73705f933eaff7e.bam	7643892	189	2e-05	13408	1397
LP6005496-DNA_B01	ES	198297	747	0.0038	A/T;730|C/G;9|CA/TG;3|TA;2|AAAAC/GTTTT;1|AG/CT;1|GA/TC;1	A/T;0.9772|C/G;0.012|CA/TG;0.004|TA;0.0027|AAAAC/GTTTT;0.0013|AG/CT;0.0013|GA/TC;0.0013	629a77c6-1b60-4e37-8cea-031ff1242517/6f8cf9b601d10e9bd82517f923f05e50.bam	87bae839-2460-4a86-8f10-92b63c363f7a/705459b427a9558670282f66354b0525.bam	7646486	1006	0.00013	22757	3471
LP6005334-DNA_E03	ES	198489	259	0.0013	A/T;253|C/G;5|AT;1	A/T;0.9768|C/G;0.0193|AT;0.0039	2f38fab1-06b2-40d7-a2c2-ea3eb3389903/bac16ed9e253a5df8200fd6973ad197c.bam	0c46aece-e99f-4206-b08e-fe33406dd270/5144479cf56f153995bc1b4f4005d181.bam	7648905	391	5e-05	25651	2138
LP6005334-DNA_F03	ES	198525	8	0	A/T;6|C/G;2	A/T;0.75|C/G;0.25	b8e821ce-bfd1-487c-8d44-7180b3c952fd/610a5396ab2df36ea7490b3733bd2cbb.bam	f7b5e1a9-f5c6-4ec6-9725-f0d2195c3721/0cf20dcaf06c163d39c219395680c817.bam	7649589	9	0	4428	478
LP6005334-DNA_G03	ES	198541	45	0.0002	A/T;43|C/G;2	A/T;0.9556|C/G;0.0444	43d3d313-569b-4feb-a4af-7adc24d12849/f4c67563f92fc22d23ca5b164267f156.bam	d63399ca-83bd-41c7-8c7b-03ce82b9e3e7/4ec65eb85b93fe1e7aaaec76908c4e2b.bam	7649824	59	1e-05	15895	992
LP6005334-DNA_H03	ES	198554	751	0.0038	A/T;730|C/G;13|AC/GT;4|CA/TG;3|AAAAC/GTTTT;1	A/T;0.972|C/G;0.0173|AC/GT;0.0053|CA/TG;0.004|AAAAC/GTTTT;0.0013	0bef43a2-352a-42c6-99ff-d97e2675a527/5365a2412ea10d21234cfb4abf71d337.bam	136d60db-bd21-4fbc-9a28-59ea70c06f27/2c0180436ed4e6909018a722255feb2d.bam	7649792	1051	0.00014	50843	4739
LP6005409-DNA_H01	ES	198458	1167	0.0059	A/T;1132|C/G;21|AT;4|AC/GT;3|TA;2|AG/CT;2|CA/TG;2|GA/TC;1	A/T;0.97|C/G;0.018|AT;0.0034|AC/GT;0.0026|TA;0.0017|AG/CT;0.0017|CA/TG;0.0017|GA/TC;0.0009	99726e08-a060-4398-aedc-bf642e64008e/670a86c57dc13f63d281b285e4b75b4d.bam	d3afe616-669d-4bff-bf35-5f559538e94d/14494d84b0b1d79b4ee27b5612a4bc1b.bam	7649024	1507	0.0002	13703	4259
LP6005500-DNA_F02	ES	198428	439	0.0022	A/T;427|C/G;9|AT;2|AC/GT;1	A/T;0.9727|C/G;0.0205|AT;0.0046|AC/GT;0.0023	ce112541-b066-4c15-9b60-a586fdcacdc1/e280b8b3eea5198ccb79ec57f17b08a1.bam	8c70e93f-022d-4584-ad2c-d95e1ecd4f0b/bec1dad26b22ffa9196172241d60f7c7.bam	7648303	611	8e-05	37794	2759
LP6005334-DNA_B02	ES	198500	816	0.0041	A/T;789|C/G;16|AT;5|AC/GT;2|TA;2|CA/TG;2	A/T;0.9669|C/G;0.0196|AT;0.0061|AC/GT;0.0025|TA;0.0025|CA/TG;0.0025	9d8ce47e-7fe4-47a0-8acc-9998907ab95c/8598cce84ebc6a7e3a8ebd1dd802d63a.bam	124f91b5-8ed1-46c7-aa88-9279e9b83c4e/c76c166f133cfefbacb11e838f7eadd1.bam	7649093	1093	0.00014	28014	4026
LP6005334-DNA_C02	ES	198442	335	0.0017	A/T;322|C/G;8|CA/TG;3|AT;1|AC/GT;1	A/T;0.9612|C/G;0.0239|CA/TG;0.009|AT;0.003|AC/GT;0.003	e078528d-4f6e-4a4e-ba68-8983156bc987/857f3099102c15cca519c325dae6240d.bam	ab3fd6b0-23a5-45ec-b0c3-7269d09d72a9/5d003d442dbaf291b70d2d8a85db9670.bam	7648289	469	6e-05	10006	1845
LP6005334-DNA_D02	ES	198383	379	0.0019	A/T;366|C/G;5|CA/TG;3|AC/GT;2|AT;1|AG/CT;1|GA/TC;1	A/T;0.9657|C/G;0.0132|CA/TG;0.0079|AC/GT;0.0053|AT;0.0026|AG/CT;0.0026|GA/TC;0.0026	eccbe671-1037-4648-8604-263b5c90b61d/91822e8cf04987cdbc89ad9f88c00d57.bam	d208ad7d-a9b0-49f0-b71d-a52106fa05d4/4f669416867d09bcccb0f6ad44e579b3.bam	7647157	507	7e-05	34223	2382
LP6005334-DNA_E02	ES	198430	17	0.0001	A/T;16|C/G;1	A/T;0.9412|C/G;0.0588	73563b54-2012-42c7-b249-eca480d20ac3/74078132182879c8e372b365103797f1.bam	cf52f15b-825c-47dc-a0f3-bfe599c76c3d/7cf3133c7550991cae566e60c099f0e5.bam	7648169	22	0	7289	619
LP6007442-DNA_A01	ES	198309	1753	0.0088	A/T;1717|C/G;24|AT;4|AC/GT;3|CA/TG;2|GA/TC;2|AG/CT;1	A/T;0.9795|C/G;0.0137|AT;0.0023|AC/GT;0.0017|CA/TG;0.0011|GA/TC;0.0011|AG/CT;0.0006	aa223c15-4b97-4617-af92-09d5939863e3/f0ecdffb43ef13045b0262f878c56abf.bam	3c10f2ff-4458-4e54-9b0f-f0757de7b5eb/04ceb5f141916f7fc091a5e0aa51ada3.bam	7645935	2408	0.00031	133500	8380
LP6005334-DNA_F02	ES	198569	355	0.0018	A/T;339|C/G;7|CA/TG;4|AC/GT;3|AT;1|AG/CT;1	A/T;0.9549|C/G;0.0197|CA/TG;0.0113|AC/GT;0.0085|AT;0.0028|AG/CT;0.0028	6eafa27f-1145-4844-a189-28f94772c742/f36e9788a505975b966b1e521c950dfd.bam	7e39feb6-c04e-47a3-b5a6-b7b59a7fc013/a80a272635b66d9df4861d1a3624cddd.bam	7649919	527	7e-05	44796	3000
LP6005334-DNA_G02	ES	198520	512	0.0026	A/T;500|C/G;8|AC/GT;2|AT;1|AG/CT;1	A/T;0.9766|C/G;0.0156|AC/GT;0.0039|AT;0.002|AG/CT;0.002	01fcb0f7-c9d3-490a-adcb-ba866e9eb4b4/450023f8bdee7b02c4aacd1c7128593b.bam	52ba3848-ceb4-445d-a00c-dc3dd5ba13fa/706e8a8516284214f76ba9a63b61697d.bam	7649240	646	8e-05	40564	3170
LP6007520-DNA_A01	ES	198491	685	0.0035	A/T;668|C/G;9|AC/GT;3|CA/TG;2|AT;1|TA;1|GA/TC;1	A/T;0.9752|C/G;0.0131|AC/GT;0.0044|CA/TG;0.0029|AT;0.0015|TA;0.0015|GA/TC;0.0015	1ff987a9-88cd-42f6-a7be-679534aebe2f/6d6d1f6776a91013bc87964cd3005e4e.bam	689ec364-707a-468b-a8c9-3569116d4fd3/b227a5220ac1ce103c6b66fa8ac1a5ec.bam	7648974	916	0.00012	13266	3056
LP6007567-DNA_A01	ES	198501	405	0.002	A/T;391|C/G;8|AT;2|AC/GT;1|TA;1|CA/TG;1|AAT/ATT;1	A/T;0.9654|C/G;0.0198|AT;0.0049|AC/GT;0.0025|TA;0.0025|CA/TG;0.0025|AAT/ATT;0.0025	975de353-d2ad-4eb3-91fe-276bb04d0e44/13a11d3cb956f0075c19f758d64b32d8.bam	52a47d31-daa2-4782-b8ce-9c7928af4a9a/a2f4cfbc8de2e9b57190be2e3939904f.bam	7649102	605	8e-05	20665	2391
LP6007602	ES	198498	867	0.0044	A/T;846|C/G;11|TA;3|AG/CT;3|AC/GT;1|AT;1|CA/TG;1|GA/TC;1	A/T;0.9758|C/G;0.0127|TA;0.0035|AG/CT;0.0035|AC/GT;0.0012|AT;0.0012|CA/TG;0.0012|GA/TC;0.0012	1bdc5173-322d-404d-9a03-89e6e11ca008/9348a162d6c1a6bb1b473dae55c75d4c.bam	0f4334eb-8837-4992-9558-9df26f909dbc/4694a3dd2c9a2daa40ccf3b8d9abbc21.bam	7648639	1195	0.00016	69719	5173
LP6007531-DNA_A01	ES	198509	673	0.0034	A/T;664|C/G;5|AC/GT;2|TA;2	A/T;0.9866|C/G;0.0074|AC/GT;0.003|TA;0.003	4ea1acd0-84c3-438b-8f43-9d23cb622890/c908cd92d16d802f80292e52fd4fb1c7.bam	b0abcbc5-2348-49a7-a26d-9f9c4c3c446c/47c410af32ae57b1681ecf42dabb69fe.bam	7648107	871	0.00011	38872	3206
SM-4AX82	ES	198363	467	0.0024	A/T;455|C/G;8|AC/GT;3|CA/TG;1	A/T;0.9743|C/G;0.0171|AC/GT;0.0064|CA/TG;0.0021	4406bad5-4dfe-4212-bf67-ef03bbfeffe4/a40dad230bc663b1f6e261d176c7ee32.bam	0c74d3ea-1aa2-4e66-98d4-a12b38ee3665/04a446c6a660694dafe43ccaf1db7162.bam	7646736	676	9e-05	22603	3993
GC12008T	ST	161136	34	0.0002	A/T;21|AC/GT;6|TA;3|CA/TG;3|GA/TC;1	A/T;0.6176|AC/GT;0.1765|TA;0.0882|CA/TG;0.0882|GA/TC;0.0294	ce03be29-75bd-4ef9-8332-a154f15e40c7/dfe053a0b4fb2f35acd8e7f3b592b6e9.bam	c46279ff-c747-4e57-a48d-5706bcb76986/9e88071efcc89015c07827595760a69a.bam	6853166	38	1e-05	1891	650
GC12014T	ST	173691	1284	0.0074	A/T;1239|C/G;16|AT;8|AC/GT;7|CA/TG;7|TA;3|AG/CT;3|GA/TC;1	A/T;0.965|C/G;0.0125|AT;0.0062|AC/GT;0.0055|CA/TG;0.0055|TA;0.0023|AG/CT;0.0023|GA/TC;0.0008	8dcdcaee-293d-4e1c-8271-87bedf10cb0d/498ad1ef4dbd80142247b9ab5c49177b.bam	a3cabe8b-9aa1-403e-9f59-cb38792cd4e6/301c6c7f706c8f628f671be01418eebc.bam	7123590	1915	0.00027	46774	6036
GC12180T	ST	195340	7	0	A/T;5|AT;1|AG/CT;1	A/T;0.7143|AT;0.1429|AG/CT;0.1429	bcc00930-ff25-451f-8d00-5219fe84da8f/84c80b4c774406473a49123c681fec4f.bam	e9b5f858-074c-46e4-b5da-1f81863c994b/c4c7510e733fc3bb8f45f576717c635c.bam	7549316	8	0	4506	258
GC12195T	ST	193709	133	0.0007	A/T;126|CA/TG;3|AC/GT;2|C/G;2	A/T;0.9474|CA/TG;0.0226|AC/GT;0.015|C/G;0.015	cccd1009-0bee-4899-bfd5-9c146f33c783/74c5d4affdd8a392c8751d40b68c29ed.bam	b1ed3d19-786f-4acd-a7d4-0c97a317ac61/3cc87374deb15e23c52a96623a3f047a.bam	7504639	215	3e-05	27817	997
GC12204T	ST	182544	61	0.0003	A/T;55|CA/TG;3|AC/GT;1|AT;1|C/G;1	A/T;0.9016|CA/TG;0.0492|AC/GT;0.0164|AT;0.0164|C/G;0.0164	0c18f954-4e73-4e9d-a11d-c8de1efef4ae/5fcc78fc8de1678a90c72b2f8f4bd5f7.bam	90d08286-a3b2-4f2e-b790-441c31aa31c4/750a7089669a92c37bb8621156659f63.bam	7197760	87	1e-05	17209	1034
GC12301T	ST	182417	11	0.0001	A/T;6|CA/TG;3|TA;1|GA/TC;1	A/T;0.5455|CA/TG;0.2727|TA;0.0909|GA/TC;0.0909	1ac8db81-37c3-4383-904f-f8164c2730a7/f99fa2020abcf9290f3ad81dfe510118.bam	61cdf1a1-c16c-4443-9532-757de224d528/59aa0b8250ee5a5d76f40eeff705d885.bam	7258271	13	0	1144	1657
GC12304T	ST	188219	14	0.0001	A/T;6|AC/GT;4|AT;2|CA/TG;1|C/G;1	A/T;0.4286|AC/GT;0.2857|AT;0.1429|CA/TG;0.0714|C/G;0.0714	9803ef42-f05a-46f4-86d9-31c81e4cba4a/0465fc32eadc46303d0728fb7647f2f7.bam	8326eac5-02b1-45ff-a6d2-6092cdf7a8c8/6cf9586b1c531d9ecf09b94f7916059c.bam	7431425	14	0	706	382
GC12305T	ST	190532	162	0.0009	A/T;151|CA/TG;4|AC/GT;3|AT;2|AG/CT;1|C/G;1	A/T;0.9321|CA/TG;0.0247|AC/GT;0.0185|AT;0.0123|AG/CT;0.0062|C/G;0.0062	cda26432-0d12-4b44-82fd-e6a35a708b1c/f94b3e298940bd3a123b54d3276cecfd.bam	814a3122-bdc1-459c-ab8d-176d1fcc3694/cae75e168fdab75b63353fd276c62492.bam	7483239	250	3e-05	12479	1143
GC12322T	ST	182984	60	0.0003	A/T;50|AC/GT;4|CA/TG;3|AT;1|AG/CT;1|GA/TC;1	A/T;0.8333|AC/GT;0.0667|CA/TG;0.05|AT;0.0167|AG/CT;0.0167|GA/TC;0.0167	c02e7a96-9a87-4c48-bbdd-b06acc160657/eade0e62f97a773b442647b0fd27d375.bam	5d57d610-9c72-4210-b011-9bc59e566e04/c9f32a03411101c5a9a380d95dec5b43.bam	7393300	88	1e-05	7024	538
GC12324T	ST	186315	35	0.0002	A/T;25|CA/TG;4|AT;2|AC/GT;1|TA;1|GA/TC;1|C/G;1	A/T;0.7143|CA/TG;0.1143|AT;0.0571|AC/GT;0.0286|TA;0.0286|GA/TC;0.0286|C/G;0.0286	791ec3ce-37f0-4e89-8430-b529e37340dd/976ccfff991d3a494adcdc807b954f56.bam	f943b5f7-5f0d-4a6c-98b2-c8454a9699d1/3d1d8286528052dbb037ce95a00c462c.bam	7335097	47	1e-05	5710	745
GC12325T	ST	185008	136	0.0007	A/T;124|AC/GT;5|CA/TG;3|AT;2|C/G;2	A/T;0.9118|AC/GT;0.0368|CA/TG;0.0221|AT;0.0147|C/G;0.0147	1416cf81-60d7-4afd-b221-3352bb8d3ee1/0f544cf5211b5768162adc2e3f435703.bam	3a3f29cb-c58b-4074-b014-ec76e95440be/eb7677e8c9834d03c70bca5f1437fec9.bam	7356271	200	3e-05	9188	1053
GC12327T	ST	191691	11	0.0001	A/T;7|CA/TG;2|AC/GT;1|TA;1	A/T;0.6364|CA/TG;0.1818|AC/GT;0.0909|TA;0.0909	716bbeda-0f52-4136-80c5-7019079165f6/18b5e86c3336627b069c6fa8b8a869b0.bam	c359de0a-939e-4630-98f9-538a0e58abcd/b63ddda459dc4e7e082c5847ddc0f6c2.bam	7496080	11	0	967	427
GC12330T	ST	189736	193	0.001	A/T;182|CA/TG;5|C/G;3|AC/GT;1|AT;1|TA;1	A/T;0.943|CA/TG;0.0259|C/G;0.0155|AC/GT;0.0052|AT;0.0052|TA;0.0052	06dd97fc-38cf-4a1c-9965-fd531189a2a6/272676d04a5b04474b55e50e422bb8a3.bam	1e35a89a-f1f1-48e8-a10c-5f8042342207/f7fb9b13f724ce8f10e52b0240d1ebf2.bam	7440238	312	4e-05	10885	1702
GC12331T	ST	191978	64	0.0003	A/T;55|C/G;4|AC/GT;3|AT;1|CA/TG;1	A/T;0.8594|C/G;0.0625|AC/GT;0.0469|AT;0.0156|CA/TG;0.0156	0bd2e423-749f-4f19-8ea3-a28b08ec896c/01ea113a6d86654c3162a6e721c4bcf8.bam	d97cf044-2617-4655-b706-8b76abf9f1ed/3056e0df8143ec49b1e5d3f3793884db.bam	7481945	108	1e-05	4839	816
GC12333T	ST	196378	127	0.0006	A/T;121|AT;2|TA;2|AC/GT;1|C/G;1	A/T;0.9528|AT;0.0157|TA;0.0157|AC/GT;0.0079|C/G;0.0079	dc8d090b-9617-4fe2-abbd-8c29c7dc4e54/09b0e793bd4bb98f577899550469a30a.bam	ce14a64e-9cef-4016-9f1a-6efe42af9b2d/3405d6fc0e941fd73d51ba8fff71c12d.bam	7602955	183	2e-05	18953	1026
GC12335T	ST	187400	440	0.0023	A/T;423|TA;4|CA/TG;3|C/G;3|AC/GT;2|AG/CT;2|AT;1|GA/TC;1|AAC/GTT;1	A/T;0.9614|TA;0.0091|CA/TG;0.0068|C/G;0.0068|AC/GT;0.0045|AG/CT;0.0045|AT;0.0023|GA/TC;0.0023|AAC/GTT;0.0023	19ef92a5-6271-493f-a1c5-cd1ea3ca3a76/ed403fe92609c4f8428ff2c37ee1fcce.bam	ce21f53e-0877-4ee0-bcf3-459443734b5b/444d1cf922841fb649a8dc74a1c2e992.bam	7334511	648	9e-05	25689	2591
GC12336T	ST	195196	17	0.0001	A/T;9|CA/TG;3|AT;2|TA;2|C/G;1	A/T;0.5294|CA/TG;0.1765|AT;0.1176|TA;0.1176|C/G;0.0588	a879ffd1-8ca9-41d7-a8dc-40515aa97747/8159c2703ae7e54e6023e6690d00f466.bam	a956669b-82ba-4e06-8c96-90567d1365fc/fbcb9894d233030bfcbb66532c009f61.bam	7567241	19	0	1421	512
GC12337T	ST	190606	211	0.0011	A/T;203|C/G;3|CA/TG;2|AT;1|AG/CT;1|GA/TC;1	A/T;0.9621|C/G;0.0142|CA/TG;0.0095|AT;0.0047|AG/CT;0.0047|GA/TC;0.0047	9fd433b9-21fb-4736-b0e3-4465b106bd5d/0c512f768f305c8798b589c38b674215.bam	14eea6a4-1543-4b01-99be-45746cdb8ea8/860ce9c48fbda4197bf98de54806cfce.bam	7488707	341	5e-05	12614	1680
GC12342T	ST	181082	24	0.0001	A/T;13|AC/GT;4|CA/TG;3|AT;2|AG/CT;1|GA/TC;1	A/T;0.5417|AC/GT;0.1667|CA/TG;0.125|AT;0.0833|AG/CT;0.0417|GA/TC;0.0417	c28ebd76-f0a5-42be-b2e6-b39f2cd007c1/426b27724833474fcc33543fab779099.bam	97bd8b6c-3883-4f0b-8292-228fec3427ae/07c51ccd050da49d3f5a2e964387d863.bam	7264600	30	0	1344	777
GC12343T	ST	168559	46	0.0003	A/T;36|AC/GT;4|C/G;3|AT;1|TA;1|CA/TG;1	A/T;0.7826|AC/GT;0.087|C/G;0.0652|AT;0.0217|TA;0.0217|CA/TG;0.0217	2aee4c25-3ca3-496c-8c74-b613a876296c/195c654682993711cce5b08099245308.bam	6db2f22a-4f5c-46cb-86c4-9d92c30fc27d/47249f7b4d48cb7ebbf6e4d11244ab3a.bam	6979314	65	1e-05	5468	804
GC12344T	ST	194911	48	0.0002	A/T;38|CA/TG;4|C/G;3|AC/GT;2|GA/TC;1	A/T;0.7917|CA/TG;0.0833|C/G;0.0625|AC/GT;0.0417|GA/TC;0.0208	90f67065-288e-4990-925b-03c3cb0a3c7d/c5d3ceb9eb4954c20e215e6d25a52662.bam	bb588575-11be-4f04-9b96-e510d10c4a3a/dbdd8d1ab8075ed6218c0e74fe3c808e.bam	7553296	68	1e-05	10744	921
GC12345T	ST	175810	228	0.0013	A/T;220|C/G;4|AC/GT;2|CA/TG;2	A/T;0.9649|C/G;0.0175|AC/GT;0.0088|CA/TG;0.0088	ebf6c71b-9f2c-4a63-a1aa-e5731dbc1275/07310093bdd093535eef79a2bc030d83.bam	e9e141f0-7be9-4ee5-ad68-3844f03c7d68/e60a9577598af1bf384937795421bb6b.bam	7116509	350	5e-05	14524	2350
GC12346T	ST	186824	27	0.0001	A/T;19|AC/GT;4|CA/TG;2|C/G;2	A/T;0.7037|AC/GT;0.1481|CA/TG;0.0741|C/G;0.0741	f78a25c1-e690-40e9-8064-c27dca5bda2d/6e2ac2031f557745e4d4dceab70707c2.bam	a173ed49-84fe-4759-b290-ef3a265e8bd1/e795a8fe0ba44c8d480b43771180f018.bam	7382996	33	0	6465	553
GC12347T	ST	189586	38464	0.2029	A/T;37282|C/G;424|AC/GT;262|CA/TG;247|AG/CT;71|GA/TC;71|AT;57|TA;42|CAAA/TTTG;2|CAGA/TCTG;1	A/T;0.9693|C/G;0.011|AC/GT;0.0068|CA/TG;0.0064|AG/CT;0.0018|GA/TC;0.0018|AT;0.0015|TA;0.0011|CAAA/TTTG;0.0001|CAGA/TCTG;0	d9fcdbd0-241f-413e-a3c8-4694e804c6ed/f4b2b1257cd379e8dc6449f45365174c.bam	f979d3ad-c00b-4e0b-94ee-a2a9e9e35e66/b7729adc6c919f69aa32ad5fbdce906b.bam	7425525	53372	0.00719	80136	131669
GC12348T	ST	192577	9	0	A/T;5|CA/TG;2|AC/GT;1|C/G;1	A/T;0.5556|CA/TG;0.2222|AC/GT;0.1111|C/G;0.1111	0028e857-efcd-4dc8-8330-0d580e593315/ccac610d37e54ed3600749689c7aec17.bam	17e367f8-3182-4e97-81bb-561135232bd7/81a87e5b88ef31e9df304497994300cd.bam	7524360	11	0	854	438
GC13003T	ST	174464	239	0.0014	A/T;225|AC/GT;4|C/G;4|CA/TG;3|AT;1|AG/CT;1|GA/TC;1	A/T;0.9414|AC/GT;0.0167|C/G;0.0167|CA/TG;0.0126|AT;0.0042|AG/CT;0.0042|GA/TC;0.0042	34a14c45-431b-4f10-ad73-f4eb900c0e89/c12f3fbc514c952e85063dfe2796f6ae.bam	806a2102-db31-4e77-b2fc-761219c1a87e/44fe7c7062d6b3337efc81c88e9defaa.bam	7147786	400	6e-05	23083	2008
GC13006T	ST	164482	29	0.0002	A/T;15|AC/GT;5|CA/TG;5|TA;3|AT;1	A/T;0.5172|AC/GT;0.1724|CA/TG;0.1724|TA;0.1034|AT;0.0345	d0218433-caee-41b0-87fd-269e530c7273/4fe2c5a330ff4711cf51ff004b229bac.bam	2e64a094-9446-4e86-b253-dc9faf476f7b/b16f2043256638dbdce2ff65ff309986.bam	7004332	34	0	1924	786
GC13008T	ST	180719	22	0.0001	A/T;13|CA/TG;7|AC/GT;2	A/T;0.5909|CA/TG;0.3182|AC/GT;0.0909	c2443dd0-12ec-4659-a1b6-40845a0dec18/5c914a118172671ff964d074455701aa.bam	98c828bb-6756-4276-920b-2ae5f6cfe6a5/633352d336a82a394d505027b7ba1732.bam	7343688	26	0	840	484
GC13034T	ST	180407	25	0.0001	A/T;15|CA/TG;6|AC/GT;2|AT;1|GA/TC;1	A/T;0.6|CA/TG;0.24|AC/GT;0.08|AT;0.04|GA/TC;0.04	154b1f28-70bc-4fd3-87b3-eb1abccc6073/e1c059e8f3130eb9feac581e054258c9.bam	fe8829c4-014f-4974-b39b-0e57713b112e/cf0a644894003fee54e8070d6d5967a3.bam	7254440	41	1e-05	4118	1028
GC13627T	ST	174392	46	0.0003	A/T;37|CA/TG;5|AC/GT;3|AT;1	A/T;0.8043|CA/TG;0.1087|AC/GT;0.0652|AT;0.0217	67dab99e-b983-4a9f-b6cc-fc6008d400d9/55138d8f378ff11bc929ffbf61a2cc89.bam	aec7dd99-c219-48a9-afd6-c973835920f2/c6b1d94e803578fc2396a2b1527af760.bam	7218225	55	1e-05	16971	614
GC13628T	ST	184115	89	0.0005	A/T;81|AC/GT;2|AT;2|CA/TG;2|AGAAA/TTTCT;1|C/G;1	A/T;0.9101|AC/GT;0.0225|AT;0.0225|CA/TG;0.0225|AGAAA/TTTCT;0.0112|C/G;0.0112	f752862e-c6fc-4ac7-a842-ed8d19259576/6e8da57983943a404cf305f2360c6c01.bam	b53e97c1-358c-4153-b02a-e6390f4b1e9f/ed0de188f1811585fe9951d3c25b746c.bam	7422425	135	2e-05	30620	966
GC13635T	ST	173801	400	0.0023	A/T;382|C/G;10|AC/GT;5|CA/TG;2|TA;1	A/T;0.955|C/G;0.025|AC/GT;0.0125|CA/TG;0.005|TA;0.0025	5053ff39-a5bd-4171-bda7-5ccce573b467/767bd286070e08936336dde3585032cc.bam	0581065b-5ee2-4e2f-8db2-70333be4121f/0755cabeaf0cc39e5b605240a2624b26.bam	7117651	620	9e-05	22834	2674
GC13686T	ST	175813	50	0.0003	A/T;39|CA/TG;6|AC/GT;2|C/G;2|TA;1	A/T;0.78|CA/TG;0.12|AC/GT;0.04|C/G;0.04|TA;0.02	f127efc5-8c10-4b27-a40d-57e60f57ef4a/3f3df403e1a90886b048ff822b060ebb.bam	e0115b03-4f4e-4f24-8dcc-135e6ef74300/49466164d331f2fe53d8aceefa348ae1.bam	7229110	71	1e-05	5984	776
GC13687T	ST	181937	189	0.001	A/T;173|AT;5|CA/TG;4|C/G;4|AC/GT;2|AG/CT;1	A/T;0.9153|AT;0.0265|CA/TG;0.0212|C/G;0.0212|AC/GT;0.0106|AG/CT;0.0053	4ec97354-ba66-40bc-842e-4ecc05b27632/7aabb6f70cbb4b2d47ee165e098c562f.bam	ef051138-4ea6-4904-a5a3-5567dfd0621e/57c3bf61e7bcac81351bbb51a4fc8e3b.bam	7306244	306	4e-05	18137	1494
GC13707T	ST	171620	244	0.0014	A/T;227|C/G;6|CA/TG;5|AT;2|AC/GT;2|AG/CT;2	A/T;0.9303|C/G;0.0246|CA/TG;0.0205|AT;0.0082|AC/GT;0.0082|AG/CT;0.0082	c29a761b-b7b0-407e-b7f9-74c18ad7ec8d/d26beb024040e7405336ded3d200bf7f.bam	91e964ef-2ab6-46b1-9aaf-d53698f151c3/2c3df2f4c04add6c07a25b1414557b0f.bam	7157381	404	6e-05	20208	1804
GC13709T	ST	160734	147	0.0009	A/T;134|CA/TG;4|C/G;4|AC/GT;3|AT;2	A/T;0.9116|CA/TG;0.0272|C/G;0.0272|AC/GT;0.0204|AT;0.0136	90ec8438-aade-481e-99da-63adf6192c3b/797dc7d7e9c034d6e36ff2f74a0e800d.bam	69fe103a-1882-4973-afc7-c34a2f352404/6d938d97451c6a07ada759f376b95a4a.bam	6908980	231	3e-05	17460	1325
GC13759T	ST	177159	67	0.0004	A/T;58|AC/GT;6|CA/TG;3	A/T;0.8657|AC/GT;0.0896|CA/TG;0.0448	a7e3d076-1070-46ac-93f1-769066f0f720/20c41184adf095ddcd0c71b24031ce1a.bam	a7796a42-5343-4596-9c45-c1d42d9f9654/364f84a2670a561dc0eff8aaadc4df93.bam	7278959	109	1e-05	8521	944
GC13776T	ST	157257	269	0.0017	A/T;260|CA/TG;4|C/G;4|AG/CT;1	A/T;0.9665|CA/TG;0.0149|C/G;0.0149|AG/CT;0.0037	bc55200f-f9ce-4c4c-9f2e-ba46e5dc0035/82a89474fb938d10da1d56a1e11b687a.bam	c5ebc72d-24ef-4fb0-876d-bbe989c7d089/0407ea469e4d7da53ba545c884a56184.bam	6709694	385	6e-05	20931	2731
GC13778T	ST	160090	199	0.0012	A/T;185|CA/TG;5|AC/GT;3|AT;3|C/G;3	A/T;0.9296|CA/TG;0.0251|AC/GT;0.0151|AT;0.0151|C/G;0.0151	dc1ee7e2-f9c4-440d-860a-1dca8f0499d5/3446c6c40e1dcf00f53b07399fc35886.bam	e102b2e7-1909-42ba-bac8-334e2ab486a1/2fc5b79b0c13598c2965666a564d1eb4.bam	6860130	362	5e-05	50411	2011
GC13790T	ST	151862	520	0.0034	A/T;501|C/G;7|CA/TG;5|TA;4|AT;1|AC/GT;1|AACA/TGTT;1	A/T;0.9635|C/G;0.0135|CA/TG;0.0096|TA;0.0077|AT;0.0019|AC/GT;0.0019|AACA/TGTT;0.0019	6ae6c979-b014-46ad-ac63-8f459582ef61/63963e90566ec9613411817120040355.bam	7148e893-e06f-4572-aa68-0d194c9da1e0/7c7328d29d91e1ccf62affb7ae793cf2.bam	6620409	861	0.00013	21247	4127
GC13824T	ST	161855	512	0.0032	A/T;492|C/G;8|CA/TG;6|AT;3|TA;3	A/T;0.9609|C/G;0.0156|CA/TG;0.0117|AT;0.0059|TA;0.0059	3ec17262-f4d7-4995-ad80-02e071c589a7/552d463fdca66a35f63c68bd2bb7ef78.bam	69ecef37-d5e0-42b2-b86b-e9fa4c4ee5f8/87af9eb8a2ab6a437d95caf9dd7257bf.bam	6864703	811	0.00012	16154	3363
7cae6c0b-36fe-411b-bbba-093a4c846d84	CN	198305	91	0.0005	A/T;77|AC/GT;4|TA;3|CA/TG;3|GA/TC;2|AT;1|AG/CT;1	A/T;0.8462|AC/GT;0.044|TA;0.033|CA/TG;0.033|GA/TC;0.022|AT;0.011|AG/CT;0.011	bddc4f28-e7ff-4a9b-b33f-b9e1740b191a/PCAWG.2e50e70c-2ee7-479d-b537-4d338e59e0f4.bam	7d75b95c-e208-40dd-bcbc-1663355352a8/PCAWG.a56e1470-fb7d-4962-bfd8-84688409fb9c.bam	7645961	158	2e-05	10827	2509
39520be3-a2af-4189-acf4-9d239363333a	CN	198548	21	0.0001	A/T;15|AT;2|AG/CT;2|CA/TG;1|C/G;1	A/T;0.7143|AT;0.0952|AG/CT;0.0952|CA/TG;0.0476|C/G;0.0476	3ff196d5-bb8e-4672-9651-d1d172fa90cd/PCAWG.c791b69e-dd72-4837-9332-641b04c5c584.bam	a0e28d65-eea9-4838-b188-63aca13cca41/PCAWG.6cb5288b-e45e-4780-bcd7-75284059d9e0.bam	7649847	26	0	7958	1503
b2d17671-d2e1-4c97-8b01-a976d5abe1d6	CN	196803	54	0.0003	A/T;41|AG/CT;3|C/G;3|AT;2|AC/GT;2|CA/TG;2|GA/TC;1	A/T;0.7593|AG/CT;0.0556|C/G;0.0556|AT;0.037|AC/GT;0.037|CA/TG;0.037|GA/TC;0.0185	8a74b042-c85a-4ad2-8966-b05531dffa87/PCAWG.c5f349ab-586f-4754-b4ec-652698a4ca95.bam	949defa4-1b4c-47f6-bc4e-845e3d15af83/PCAWG.099521d0-0e78-4814-b890-7d4c0641e52a.bam	7615951	112	1e-05	6342	2056
1e27cc8a-5394-4958-9af6-5ece1fe24516	CN	185227	97	0.0005	A/T;88|AT;2|AC/GT;2|CA/TG;2|TA;1|C/G;1|GA/TC;1	A/T;0.9072|AT;0.0206|AC/GT;0.0206|CA/TG;0.0206|TA;0.0103|C/G;0.0103|GA/TC;0.0103	fcc335ca-9ad0-4745-8958-85d0f74073eb/PCAWG.701ee04f-ee1c-42b4-9614-499d51cf4a0a.bam	c174e3fa-00bd-43f1-9a3d-b2903b2d14a4/PCAWG.d19dbf14-3293-4e09-a072-a746bb26376c.bam	7277917	152	2e-05	9516	1474
96ef40c3-8d4c-4fe1-a33a-99f5b205a0bb	CN	178900	51	0.0003	A/T;44|CA/TG;3|AC/GT;2|AT;1|TA;1	A/T;0.8627|CA/TG;0.0588|AC/GT;0.0392|AT;0.0196|TA;0.0196	68381915-3304-4d69-8dc3-95eebf28ea49/PCAWG.fa4fa49d-6d53-4ffa-9759-ffb884b28d17.bam	1de43b78-ff01-4cb2-a94e-6a033ad59c0e/PCAWG.64d83e97-f798-45d1-b9e6-efaa635b4abb.bam	6899983	93	1e-05	6253	1318
a6957d15-453c-4f3b-ab8c-c38054dfe548	CN	165802	16	0.0001	A/T;15|AC/GT;1	A/T;0.9375|AC/GT;0.0625	e0f52376-56a4-45af-987b-6599166f905f/PCAWG.f9e97db2-33ae-4bea-af29-9949cda838ea.bam	a4547aa4-da1f-4235-9614-db206be96379/PCAWG.9f6f74fa-0707-4caa-b658-8ad588b6072d.bam	6820208	29	0	4042	874
d1132127-1250-43af-9c16-425798a3d1a7	CN	149529	72	0.0005	A/T;63|AT;2|CA/TG;2|C/G;2|AC/GT;1|TAGA/TCTA;1|AG/CT;1	A/T;0.875|AT;0.0278|CA/TG;0.0278|C/G;0.0278|AC/GT;0.0139|TAGA/TCTA;0.0139|AG/CT;0.0139	0cf3cce3-4f65-4bc0-8b0d-0ca25ceb8c74/PCAWG.e50d3820-9571-4451-94de-3ea1e93edce6.bam	9ac86904-6dd7-4919-9a54-a09985d96ed8/PCAWG.125ada35-5bfa-4f7e-acb9-9dea174cd55b.bam	6312748	124	2e-05	8670	1411
a8f86b64-914c-4d89-897b-33bcdd1759f7	CN	153918	91	0.0006	A/T;74|AC/GT;9|CA/TG;6|AT;1|C/G;1	A/T;0.8132|AC/GT;0.0989|CA/TG;0.0659|AT;0.011|C/G;0.011	41ff1ef4-e358-4086-b43b-cfa71b8c5b91/PCAWG.4b6bba30-2fa0-44da-a894-92115fbf1dff.bam	cdc43d1d-77f1-4bd1-a55e-71cb28f053cc/PCAWG.9bc2601a-df86-42e3-a270-ba0fecad0d19.bam	6511548	133	2e-05	5126	1277
82d7fa2d-19cd-41b7-8ed1-ea9fb9a544c6	CN	195443	62	0.0003	A/T;44|AG/CT;6|CA/TG;5|AC/GT;3|AT;2|GA/TC;1|C/G;1	A/T;0.7097|AG/CT;0.0968|CA/TG;0.0806|AC/GT;0.0484|AT;0.0323|GA/TC;0.0161|C/G;0.0161	f606f7a7-e317-440f-b983-57a1877c5277/PCAWG.a10ac174-33b4-45cf-9050-bc5af497d6d7.bam	98a8c786-dd24-46fb-9ce6-28b69931b537/PCAWG.c9d5f460-3f05-470c-99b7-c289f2919f03.bam	7623111	85	1e-05	5050	1603
ece0f3a4-a204-4c52-bb1f-88d44a875b2e	CN	191962	116	0.0006	A/T;100|CA/TG;4|C/G;4|AC/GT;3|AT;2|TA;2|AG/CT;1	A/T;0.8621|CA/TG;0.0345|C/G;0.0345|AC/GT;0.0259|AT;0.0172|TA;0.0172|AG/CT;0.0086	e53744b6-d1cb-4a3f-b51a-7080f8f48b64/PCAWG.3b217519-a8fb-450d-9e88-27e0dd07afe2.bam	2f643e56-b8c8-4866-a282-33136ec81ad2/PCAWG.bce80a38-3810-4e76-9946-ae20a8baa9a9.bam	7473606	180	2e-05	13320	1142
6de41ac1-229b-40b9-a494-5588c284351d	CN	147489	86	0.0006	A/T;68|AC/GT;4|CA/TG;4|C/G;3|GA/TC;3|AG/CT;2|AT;1|TA;1	A/T;0.7907|AC/GT;0.0465|CA/TG;0.0465|C/G;0.0349|GA/TC;0.0349|AG/CT;0.0233|AT;0.0116|TA;0.0116	53fcb193-0899-47ee-b61f-1049017eebfc/PCAWG.2ebf225b-2172-495c-b702-36baf31b98a7.bam	e96ebc53-aea4-446d-a8cc-fba57d53db5a/PCAWG.bfb50740-29f7-46be-9fb9-c00bf12b8582.bam	6250209	118	2e-05	10383	1325
2fdab641-d73b-4f9a-aa4c-c1944f131a69	CN	190030	80	0.0004	A/T;62|CA/TG;8|AC/GT;6|TA;2|GA/TC;2	A/T;0.775|CA/TG;0.1|AC/GT;0.075|TA;0.025|GA/TC;0.025	62ef0916-ae7f-4c7c-ad3c-de70dadbd325/PCAWG.57584c14-6e6c-4f2c-9430-5444570c79ea.bam	897b187f-a3df-4502-86df-226f43be5cbc/PCAWG.83d78ed4-6ed3-4d03-ad2e-53c7ad306447.bam	7464106	128	2e-05	5537	1347
0332b017-17d5-4083-8fc4-9d6f8fdbbbde	CN	151187	72	0.0005	A/T;62|AC/GT;4|CA/TG;4|TA;2	A/T;0.8611|AC/GT;0.0556|CA/TG;0.0556|TA;0.0278	7add0a6f-25b0-4d43-a058-70885f8f46bc/PCAWG.515488df-7444-4249-9343-d102147ff315.bam	1518ac13-fb25-4059-a5ce-24f14c3f7267/PCAWG.927a31f9-3090-4f76-bbef-a06c7b079f95.bam	6384012	142	2e-05	9028	1662
914421d2-898e-433e-bb66-b1710eaae2c7	CN	152817	132	0.0009	A/T;110|AC/GT;6|CA/TG;4|AG/CT;3|GA/TC;3|C/G;3|AT;2|TA;1	A/T;0.8333|AC/GT;0.0455|CA/TG;0.0303|AG/CT;0.0227|GA/TC;0.0227|C/G;0.0227|AT;0.0152|TA;0.0076	43c451ba-3c7d-4f6f-88f9-2989006f63d4/PCAWG.952b3c9d-b2ce-495f-af26-af6712838857.bam	f0a47c2a-da8d-4dd0-a250-c1abb2a0c46e/PCAWG.55ac4df1-cebb-4eac-b868-000ef020acc6.bam	6490250	194	3e-05	12525	1698
3914c02e-44ad-4c96-8464-61aa95b42c49	CN	198208	64	0.0003	A/T;57|CA/TG;5|AG/CT;1|C/G;1	A/T;0.8906|CA/TG;0.0781|AG/CT;0.0156|C/G;0.0156	c04beb2d-66e9-4a2c-9730-d85e884966d1/PCAWG.5e805e5f-06aa-410e-8f3c-00666c5a16f9.bam	e38adf1d-2d66-4615-b8f5-605e4a3385fd/PCAWG.c47d6ff5-d5d1-4838-be9b-06f3ad968376.bam	7638445	112	1e-05	9938	1716
65723119-bdfe-46f0-b629-c171023abd71	CN	143345	82	0.0006	A/T;72|CA/TG;4|AC/GT;2|TA;2|AT;1|C/G;1	A/T;0.878|CA/TG;0.0488|AC/GT;0.0244|TA;0.0244|AT;0.0122|C/G;0.0122	dec91ac2-f519-4047-9403-06fbc6bf2613/PCAWG.baef0f11-3318-48c4-a5e2-eefc2e2dd880.bam	ab44d5e5-53d4-4aad-9887-3f00b5d1461d/PCAWG.7725cfb4-22c7-496d-9fac-219cb6162d9f.bam	6310943	123	2e-05	9838	1115
7163a0f7-2c69-40b8-8857-8ab3f46f0acf	CN	176416	69	0.0004	A/T;63|AC/GT;4|CA/TG;1|C/G;1	A/T;0.913|AC/GT;0.058|CA/TG;0.0145|C/G;0.0145	3bb696d4-0baa-48e2-9217-ad6d5d5b4f9f/PCAWG.740d4a56-9a53-4c0c-8a0e-8120d88e4196.bam	3740a442-18d6-4358-b3aa-6170e4d35697/PCAWG.62ffaace-0002-4977-8b06-c806cf461846.bam	7001228	120	2e-05	10032	1240
fca08ee9-b480-4dc7-be56-f1eb03b56f7c	CN	177604	83	0.0005	A/T;67|AC/GT;5|CA/TG;5|AG/CT;2|C/G;2|AT;1|TA;1	A/T;0.8072|AC/GT;0.0602|CA/TG;0.0602|AG/CT;0.0241|C/G;0.0241|AT;0.012|TA;0.012	40a631be-99d5-42bc-89eb-5f99ba9001f0/PCAWG.8878052e-8907-4bf3-b593-238549d57669.bam	4e3c9aeb-cd5b-4c65-b2e9-ff29d90497af/PCAWG.5c55c1cb-c455-4139-9dcc-7ea209fa4729.bam	7187164	128	2e-05	6045	1208
d60f54f5-b154-42c4-99fb-cea4e7a33dc7	CN	163733	94	0.0006	A/T;82|AC/GT;5|CA/TG;4|AT;1|C/G;1|GA/TC;1	A/T;0.8723|AC/GT;0.0532|CA/TG;0.0426|AT;0.0106|C/G;0.0106|GA/TC;0.0106	ec06c3e9-aa86-4eb8-8d21-42749aafbe26/PCAWG.10b944ea-7df7-467c-9565-184b9d056d1d.bam	3724bd85-ed8b-4ae8-9376-8c5d43e0d5ed/PCAWG.23a4dc82-3e87-474c-9893-3bf2727effdc.bam	6846788	139	2e-05	8544	1429
c065761d-f775-457f-bda0-4c7c257a701e	CN	195240	98	0.0005	A/T;79|AC/GT;4|TA;4|AG/CT;4|AT;2|GA/TC;2|CATA/TATG;1|CA/TG;1|C/G;1	A/T;0.8061|AC/GT;0.0408|TA;0.0408|AG/CT;0.0408|AT;0.0204|GA/TC;0.0204|CATA/TATG;0.0102|CA/TG;0.0102|C/G;0.0102	65557aab-f7d3-4d22-a1fb-19d09573e0c0/PCAWG.3c0ba0ab-b755-4ecf-9804-79bfb0c6cc94.bam	046533a8-fecb-4248-9377-5b3f51afd8c9/PCAWG.84f95e67-9a3e-47f2-b8b7-d0f88682fd35.bam	7615697	154	2e-05	14889	2759
96e3db14-2bb1-4f68-aed6-5e794750c96e	CN	198398	103	0.0005	A/T;86|AC/GT;5|CA/TG;3|AG/CT;2|C/G;2|GA/TC;2|AT;1|CACAC/GTGTG;1|TA;1	A/T;0.835|AC/GT;0.0485|CA/TG;0.0291|AG/CT;0.0194|C/G;0.0194|GA/TC;0.0194|AT;0.0097|CACAC/GTGTG;0.0097|TA;0.0097	24d4c2fe-86cc-4c77-837a-7c7440a1ad84/PCAWG.10d7c81b-8f5b-4db9-ae69-6ef1eed7a312.bam	22c52a0a-ee46-46b1-8f3e-c91fe3a19425/PCAWG.1bf802b8-24c6-4052-a6af-aa9f98f8ee24.bam	7647293	182	2e-05	11968	2484
b8151614-b08f-49a3-ab6f-2e780f765a17	CN	173149	96	0.0006	A/T;78|AC/GT;6|C/G;6|AG/CT;2|CA/TG;2|AT;1|TA;1	A/T;0.8125|AC/GT;0.0625|C/G;0.0625|AG/CT;0.0208|CA/TG;0.0208|AT;0.0104|TA;0.0104	a3b13917-635b-47af-9174-3d5b4731a8df/PCAWG.921fbb4b-f2a8-488a-9754-00bb524c6222.bam	42142e7e-a374-4d61-a10a-b04f24f958f1/PCAWG.0fac518a-9ea4-4881-a68e-23698cf98f57.bam	7048035	151	2e-05	7265	1322
25bee010-cc99-4af0-ba2f-fe4dd308be33	CN	178135	30	0.0002	A/T;22|AC/GT;3|CA/TG;3|AT;1|TA;1	A/T;0.7333|AC/GT;0.1|CA/TG;0.1|AT;0.0333|TA;0.0333	411fcafd-0e1f-4cff-9a99-6ffa2c1e785c/PCAWG.d9cbd84f-dc85-4a11-8df7-b68b2316b28a.bam	3b59feca-27d1-4f18-9d84-17348d26d30d/PCAWG.4d6b9b8b-3aa9-4563-9966-17d1af9b6bb8.bam	7141083	40	1e-05	2769	846
08ac57ec-0036-4134-a9bb-f22eaa27ab0d	CN	178314	116	0.0007	A/T;100|AC/GT;5|CA/TG;4|C/G;3|AT;2|AG/CT;1|GA/TC;1	A/T;0.8621|AC/GT;0.0431|CA/TG;0.0345|C/G;0.0259|AT;0.0172|AG/CT;0.0086|GA/TC;0.0086	509bd0b1-796b-4fbd-8724-dc389197e5b6/PCAWG.9cee1dbd-5fd4-426f-82e2-45c661b1262f.bam	75b000c5-b79f-447b-9878-bd1a208f6505/PCAWG.1ae88de1-c985-4dee-9a3e-217a0b3bef4c.bam	7262783	162	2e-05	8206	1190
53dec97d-0464-4ffd-8e2e-95b2b9a03af0	CN	160401	94	0.0006	A/T;82|AC/GT;5|CA/TG;2|C/G;2|AT;1|TA;1|GA/TC;1	A/T;0.8723|AC/GT;0.0532|CA/TG;0.0213|C/G;0.0213|AT;0.0106|TA;0.0106|GA/TC;0.0106	0760e689-eb60-4c53-aab5-edf91628e1ea/PCAWG.bcce406d-cad0-4aca-8c76-1960f3aca822.bam	fed654f3-b6cd-4d7b-b6df-a43b40b29334/PCAWG.67a06ced-999a-4412-a3f8-9cc24f12ea28.bam	6749933	156	2e-05	12570	1436
04339769-517c-448d-a7ca-951f83608c60	CN	166028	71	0.0004	A/T;62|AC/GT;5|CA/TG;2|TA;1|AG/CT;1	A/T;0.8732|AC/GT;0.0704|CA/TG;0.0282|TA;0.0141|AG/CT;0.0141	3021739f-5fec-4edd-988f-d3780277234d/PCAWG.f0c8b9b6-dc29-4cf1-ae2b-2963fb991fe5.bam	d515764a-2307-4b57-861d-1d4c98e7d664/PCAWG.c13c2a30-2594-4c85-8e4a-f91a0dba4073.bam	7009596	95	1e-05	4125	964
f98de26b-c7d6-435d-81fa-1f1869da9087	CN	198186	176	0.0009	A/T;167|AC/GT;6|AT;1|CA/TG;1|GA/TC;1	A/T;0.9489|AC/GT;0.0341|AT;0.0057|CA/TG;0.0057|GA/TC;0.0057	6fca277d-fcfe-4daf-aa42-401328282261/PCAWG.075a1c91-81a7-488c-8186-d3e6c3f80dd9.bam	d94e841a-e115-4176-a261-0520928a981e/PCAWG.6e7a9f18-773c-4067-b543-cf589d4b3ad1.bam	7644508	244	3e-05	261903	4051
5fd77ba9-5015-4d8b-86a0-582e5c76bdd6	CN	148150	91	0.0006	A/T;82|CA/TG;3|AC/GT;2|AT;1|AG/CT;1|C/G;1|GA/TC;1	A/T;0.9011|CA/TG;0.033|AC/GT;0.022|AT;0.011|AG/CT;0.011|C/G;0.011|GA/TC;0.011	b014cd6b-5019-40a2-b338-927fe2512de0/PCAWG.b6367552-5dbd-474a-a1dc-47d01a96876c.bam	0e3ad9c5-ce06-4424-b205-3695d18a1280/PCAWG.b090883d-0e39-4edc-aa74-7285366c304b.bam	6407251	153	2e-05	13219	1319
2c71d542-1653-4d97-8752-f2fd05c7e75d	CN	151082	70	0.0005	A/T;53|AC/GT;6|AG/CT;4|C/G;3|CA/TG;2|AT;1|TA;1	A/T;0.7571|AC/GT;0.0857|AG/CT;0.0571|C/G;0.0429|CA/TG;0.0286|AT;0.0143|TA;0.0143	bd1a7e8a-1d7b-4d83-87ec-449fdc0c035e/PCAWG.ecae9498-c909-47b2-9c62-5abec1b2cc55.bam	18cd48b0-47b8-4b55-aca4-12462a4abcad/PCAWG.6dfbd313-b122-47eb-b367-30178ff594de.bam	6380782	94	1e-05	9615	1382
b60392fb-43d9-4c9c-b91b-ded40492e61c	CN	198056	79	0.0004	A/T;65|AC/GT;3|CA/TG;3|AT;2|AG/CT;2|C/G;2|GA/TC;2	A/T;0.8228|AC/GT;0.038|CA/TG;0.038|AT;0.0253|AG/CT;0.0253|C/G;0.0253|GA/TC;0.0253	74b82543-b889-458f-94eb-eda2a5fe55d0/PCAWG.10108b65-f1b1-4e08-947c-ffb4afe52380.bam	1e0191b3-1b8c-480e-8983-c4b560e29a1a/PCAWG.9a19031d-cbf0-4862-a4af-aaeba9ae3570.bam	7639669	117	2e-05	9812	1632
56ffaa35-814c-4c0b-b3c6-d4514d34fec2	CN	188797	130	0.0007	A/T;106|AC/GT;6|CA/TG;6|AT;3|GA/TC;3|AG/CT;2|C/G;2|TA;1|CAAA/TTTG;1	A/T;0.8154|AC/GT;0.0462|CA/TG;0.0462|AT;0.0231|GA/TC;0.0231|AG/CT;0.0154|C/G;0.0154|TA;0.0077|CAAA/TTTG;0.0077	35a54d2e-d02b-42fc-8a6c-c29afd7bb304/PCAWG.112d3850-3998-4b64-9be8-1fa5ef4f6699.bam	b76abf64-97c5-4f02-979b-7cb50979e4c5/PCAWG.e5ed8877-e214-4eee-a7be-f8987f4dda91.bam	7446289	236	3e-05	9508	2855
b1e62d8e-24d2-4118-8cd0-3142acebdd5b	CN	150513	76	0.0005	A/T;65|AC/GT;3|CA/TG;3|AG/CT;2|TA;1|C/G;1|GA/TC;1	A/T;0.8553|AC/GT;0.0395|CA/TG;0.0395|AG/CT;0.0263|TA;0.0132|C/G;0.0132|GA/TC;0.0132	d05f07a0-ae08-4062-b66d-cbd5726a014e/PCAWG.2eee6dff-8697-4a12-b496-9843b68f137b.bam	8498cbfb-8256-40e6-8853-e2d7e25a5c35/PCAWG.c90960b3-ca67-451f-b922-08c63da33e79.bam	6289994	107	2e-05	6620	1302
9880c3c9-5685-42a7-8fe9-7585ea1a1d37	CN	185763	87	0.0005	A/T;70|AC/GT;6|CA/TG;5|TA;3|C/G;2|GA/TC;1	A/T;0.8046|AC/GT;0.069|CA/TG;0.0575|TA;0.0345|C/G;0.023|GA/TC;0.0115	5a7793ec-7fff-4024-944e-ed367d69cdac/PCAWG.34c4d97e-3a3f-46cb-89fb-4377608fd411.bam	56e4ac42-927f-43e3-987b-2a882a774e5e/PCAWG.04d406a3-60c0-4ed4-a2b5-4b7a697049bd.bam	7453184	127	2e-05	6869	1147
841eb82b-347d-4d7f-805f-3f3701a2983d	CN	139814	83	0.0006	A/T;67|AG/CT;6|CA/TG;5|GA/TC;3|AC/GT;2	A/T;0.8072|AG/CT;0.0723|CA/TG;0.0602|GA/TC;0.0361|AC/GT;0.0241	8d525a72-c81a-4a56-8449-4e1a74ee4000/PCAWG.819d727f-8e13-4f46-973a-667014133be5.bam	fbc2ffaa-4d17-4e04-ab1d-32aa67240637/PCAWG.0cb8b751-00e1-4f02-bf08-b56921e84f08.bam	6319423	133	2e-05	10076	3366
eab71331-53d3-4cf5-96c9-5121a3962c27	CN	189037	70	0.0004	A/T;59|AC/GT;4|CA/TG;3|AG/CT;2|TA;1|AAC/GTT;1	A/T;0.8429|AC/GT;0.0571|CA/TG;0.0429|AG/CT;0.0286|TA;0.0143|AAC/GTT;0.0143	708e550d-1451-42ad-85bb-66a7b2d08760/PCAWG.0a46af41-3971-4116-98bb-48ff0cbe2f78.bam	3c8a5f2d-fee2-40d3-a198-a136d5585b67/PCAWG.0e55832b-32c8-4759-9b43-29e8af629af0.bam	7402091	100	1e-05	8165	1101
a8041e86-071e-46cd-8fb5-7ecdc1ab0553	HN	191479	127	0.0007	A/T;119|CA/TG;3|AT;2|C/G;2|AC/GT;1	A/T;0.937|CA/TG;0.0236|AT;0.0157|C/G;0.0157|AC/GT;0.0079	800c6099-ae03-4f73-842f-28ad44bb4230/PCAWG.f9642393-8019-49a3-9a13-0e31d51fa4bd.bam	42806c36-b60b-4421-bc14-25c26eedd1d3/PCAWG.095603a6-4192-4c70-8c13-9ad46934f9ee.bam	7503307	161	2e-05	7719	1844
5193a482-6ed9-4504-bd7c-c8b9e4103577	HN	171669	174	0.001	A/T;160|CA/TG;5|C/G;5|AC/GT;1|TA;1|AG/CT;1|GA/TC;1	A/T;0.9195|CA/TG;0.0287|C/G;0.0287|AC/GT;0.0057|TA;0.0057|AG/CT;0.0057|GA/TC;0.0057	cdad9413-eb63-4290-9955-630fe32296fc/PCAWG.863fe801-c4eb-436c-9410-545a1164e943.bam	3b3b81f5-460c-4382-822f-be5f279781b3/PCAWG.9428f3db-6c71-41cc-83a0-1bc0d4a105cc.bam	7194462	265	4e-05	46408	2314
d4b80307-abbd-48bb-b52c-6dcd409699a2	HN	184198	112	0.0006	A/T;88|CA/TG;7|AC/GT;6|C/G;6|GA/TC;3|TA;1|AG/CT;1	A/T;0.7857|CA/TG;0.0625|AC/GT;0.0536|C/G;0.0536|GA/TC;0.0268|TA;0.0089|AG/CT;0.0089	b8e83a08-d46e-43aa-b94e-9b37e51de9a0/PCAWG.000f332c-7fd9-4515-bf5f-9b77db43a3fd.bam	db321d2c-92a4-4d0a-8376-d88818ab5e66/PCAWG.4e9aae2e-ea49-4fba-bfaf-6b05a93fd3da.bam	7504587	152	2e-05	6580	919
878a7fe7-20ff-4651-9587-b4d6fd42e929	HN	197605	179	0.0009	A/T;175|AC/GT;2|C/G;2	A/T;0.9777|AC/GT;0.0112|C/G;0.0112	e42d8b45-646d-4bf2-b4d9-1c3998d231c7/PCAWG.a0963407-05e7-4c84-bfe0-34aacac08eed.bam	bdffc6fb-0da3-47aa-ab87-66712732e0f6/PCAWG.251916ec-f78e-4eae-99fe-ff802e3ce2fe.bam	7627783	237	3e-05	6147	1798
46d35b82-e1b7-4d35-be5e-3a70fd47e421	HN	197530	315	0.0016	A/T;293|C/G;9|AC/GT;5|CA/TG;4|AG/CT;3|TA;1	A/T;0.9302|C/G;0.0286|AC/GT;0.0159|CA/TG;0.0127|AG/CT;0.0095|TA;0.0032	e58e5f6d-8acf-4c37-9e48-7ec1143622ad/PCAWG.8eb3ea0c-7607-49b4-ad40-51b6a94580cf.bam	3aab2534-6cc6-4799-ad40-21b8fb5be244/PCAWG.4282dbca-91dc-4dc9-8146-298be73d8bb1.bam	7638375	443	6e-05	31193	2555
c76f7fcc-2748-4b6d-805e-d21652dd5e3a	HN	197058	192	0.001	A/T;186|AG/CT;2|CA/TG;2|AC/GT;1|AT;1	A/T;0.9688|AG/CT;0.0104|CA/TG;0.0104|AC/GT;0.0052|AT;0.0052	b8ae1473-ca40-4fd5-a63d-566c67d288bc/PCAWG.85072536-71c2-476a-a0bb-3152d10f8959.bam	8ec954b3-9129-4776-b497-fb87f04f7ad1/PCAWG.30ec872d-a8ca-4e9b-816b-d7b4f6e55e67.bam	7610825	291	4e-05	28106	2219
dfa20d2d-1ba3-476a-b4b9-21d21470bee2	HN	186244	88	0.0005	A/T;78|AT;2|CA/TG;2|C/G;2|AC/GT;1|TA;1|AG/CT;1|GA/TC;1	A/T;0.8864|AT;0.0227|CA/TG;0.0227|C/G;0.0227|AC/GT;0.0114|TA;0.0114|AG/CT;0.0114|GA/TC;0.0114	ab3deb6f-558a-437c-a9fb-0124b400de76/PCAWG.b7c93acf-de6a-402e-a9b8-7644af214019.bam	ffcc5bd5-dbd2-48b5-b1d8-3fec95ebbd0e/PCAWG.03a77f9e-fcdb-4795-8c2f-141fbfeda1bb.bam	7531369	173	2e-05	53262	1298
7158c9fd-a633-4fef-aa23-bd285f2a87a8	HN	197669	48	0.0002	A/T;38|AG/CT;3|AC/GT;2|AT;2|C/G;2|CA/TG;1	A/T;0.7917|AG/CT;0.0625|AC/GT;0.0417|AT;0.0417|C/G;0.0417|CA/TG;0.0208	ff2f3166-7fad-41f6-9cd3-073acd9c81f5/PCAWG.00aa4fb4-f636-404c-bb4c-0728a1ae8c0d.bam	20dcfdd5-4834-4dcc-9bcb-f71bb93dc233/PCAWG.de6a197f-58c7-46f7-9f41-cafe488a2222.bam	7639763	73	1e-05	5848	1360
a0fe80e0-e3ac-485b-8a1a-4c80c101b874	HN	192469	109	0.0006	A/T;106|C/G;2|AC/GT;1	A/T;0.9725|C/G;0.0183|AC/GT;0.0092	1318ef92-4553-4a0d-94e5-0ef3e6779b49/PCAWG.95176ee9-b08d-43f8-875f-ea38c3821778.bam	18bbbb3f-ad99-440b-803b-d130ba545e54/PCAWG.d2f1678c-6ebd-4f32-914c-497fc7ab6ae5.bam	7542475	165	2e-05	9440	1496
1aff91a6-1b0f-4575-8f4b-4e064a50b886	HN	189190	267	0.0014	A/T;263|AT;1|TA;1|CA/TG;1|C/G;1	A/T;0.985|AT;0.0037|TA;0.0037|CA/TG;0.0037|C/G;0.0037	e4b53234-d0ea-4f65-9dee-5aec61c148a9/PCAWG.16427f3e-48cc-4bbe-89f5-e7f3b082838d.bam	87f7847e-7763-406b-8977-36b7c42c6dc5/PCAWG.6afb13e8-6d2e-4b0a-af61-bc7d66e14f9d.bam	7458976	362	5e-05	12042	3109
d3709eea-ca2a-49ac-b79c-871a5473d450	HN	198019	154	0.0008	A/T;141|C/G;5|AT;2|TA;2|CA/TG;2|AC/GT;1|GA/TC;1	A/T;0.9156|C/G;0.0325|AT;0.013|TA;0.013|CA/TG;0.013|AC/GT;0.0065|GA/TC;0.0065	cd1d6686-f70a-4463-96d3-8797bfaf4e38/PCAWG.86e49eb0-7fe4-4d24-81bb-e04251ccc7ab.bam	23645590-eedd-4a02-9d92-ccadf526d85d/PCAWG.e4c57024-7622-4621-8bc1-26a1fc9c8ed6.bam	7632578	244	3e-05	24740	1896
a315b798-f037-48d5-91ed-e733e3bbd6ee	HN	198084	195	0.001	A/T;186|C/G;4|AC/GT;3|AT;1|AG/CT;1	A/T;0.9538|C/G;0.0205|AC/GT;0.0154|AT;0.0051|AG/CT;0.0051	fdc45d26-a338-4b6e-85b2-055e3c7c47e5/PCAWG.f2bb45f4-fae4-468c-8675-a9c2a40feb66.bam	8b22aee8-5b6d-4cd5-9963-555ca63f1957/PCAWG.b13de1b0-deff-445f-9f20-e068d51607d7.bam	7637162	304	4e-05	19821	2282
de8ef60b-4dbe-4aa8-adef-6f58cdfada29	HN	198305	117	0.0006	A/T;115|AC/GT;1|CA/TG;1	A/T;0.9829|AC/GT;0.0085|CA/TG;0.0085	63d5f1ca-186a-4d27-8f56-7ecc2409f0ec/PCAWG.d3fd464a-f0b1-41af-88f2-27f5d7417a0b.bam	69130743-1f8e-4507-a3dd-6958c5419fa6/PCAWG.bdd67234-0b9f-4257-930f-0402db38eb97.bam	7642973	184	2e-05	15211	1540
190eb791-383d-4e27-870d-e470630843e7	HN	197359	191	0.001	A/T;178|C/G;4|AT;3|AC/GT;2|GA/TC;2|TA;1|CA/TG;1	A/T;0.9319|C/G;0.0209|AT;0.0157|AC/GT;0.0105|GA/TC;0.0105|TA;0.0052|CA/TG;0.0052	de7918bd-0adc-4778-be60-ba1be918c45b/PCAWG.667c27e3-f105-4ab6-945b-43840173044d.bam	9b729141-890e-4ff9-9da6-2f1722813033/PCAWG.7deb6875-292d-4cba-85cc-1f93de939987.bam	7618664	282	4e-05	19165	1884
8294a969-59a1-4d3b-895b-f07e96bf9f7a	HN	196766	108	0.0005	A/T;101|CA/TG;2|C/G;2|AC/GT;1|TA;1|GA/TC;1	A/T;0.9352|CA/TG;0.0185|C/G;0.0185|AC/GT;0.0093|TA;0.0093|GA/TC;0.0093	955d7ff8-c53e-4ce9-8176-5aa9ec26fb39/PCAWG.63aa58db-4245-4196-be6e-1bfa1382acec.bam	8500bb6e-8782-4cb9-aa52-3c6bc8db6d26/PCAWG.b12f60fc-240c-4a3e-ba20-18edebf03fab.bam	7590382	183	2e-05	20779	2237
e2b5c926-491d-430d-8d9c-5c73d7752d1b	HN	193382	173	0.0009	A/T;160|CA/TG;5|C/G;5|AT;2|AC/GT;1	A/T;0.9249|CA/TG;0.0289|C/G;0.0289|AT;0.0116|AC/GT;0.0058	7fae28fd-8537-474a-9f28-cd6eeb37cfcd/PCAWG.422bf639-ec3e-4892-9d20-7180d3f6f949.bam	eb56b5aa-a1f4-409d-8369-4ade64514f07/PCAWG.74923ba6-d428-49e4-997b-5d1b646baaa2.bam	7555638	370	5e-05	71328	4337
c121de15-78f7-4698-91bf-fd0485c466c2	HN	190290	47	0.0002	A/T;30|AC/GT;9|CA/TG;6|AG/CT;1|C/G;1	A/T;0.6383|AC/GT;0.1915|CA/TG;0.1277|AG/CT;0.0213|C/G;0.0213	9bc51c09-a42e-414a-a996-d514ef333066/PCAWG.511266d0-5247-43f4-b985-4cd20dd674c1.bam	a3fb0a2f-6e90-441b-b3b6-8658690c9a80/PCAWG.f785e861-ef1c-4b2a-aeb5-5b21abf21f52.bam	7594648	58	1e-05	897	581
ee963667-56b1-49bd-8896-e07b536d3014	HN	197481	139	0.0007	A/T;129|AC/GT;4|TA;3|CA/TG;2|C/G;1	A/T;0.9281|AC/GT;0.0288|TA;0.0216|CA/TG;0.0144|C/G;0.0072	e23194db-863d-4597-992e-9f5381befdab/PCAWG.81cd6abf-ba3f-43d3-9423-96defa269f87.bam	107e8d8f-ea7b-415f-bd7f-cd8b78a7ae44/PCAWG.18c017d0-134d-4531-9940-4d0c9dac38f5.bam	7623025	186	2e-05	4285	1322
5046f1b4-9d95-4841-ba30-691fa44719a2	HN	197595	161	0.0008	A/T;145|AC/GT;4|CA/TG;4|AT;3|C/G;2|ACA/TGT;1|AG/CT;1|GA/TC;1	A/T;0.9006|AC/GT;0.0248|CA/TG;0.0248|AT;0.0186|C/G;0.0124|ACA/TGT;0.0062|AG/CT;0.0062|GA/TC;0.0062	12524d63-391f-4023-a64b-52465d0f2b6c/PCAWG.8cf3e556-4057-40c8-a468-133986522ed7.bam	042c3e89-bdbd-4725-9e1f-6b66f5ba5e6c/PCAWG.3a2f274b-9594-4290-849e-2021741648fe.bam	7621695	292	4e-05	34672	2311
7e584ff6-0b81-4f85-81da-b8117afee326	HN	197667	174	0.0009	A/T;167|AC/GT;4|C/G;2|GA/TC;1	A/T;0.9598|AC/GT;0.023|C/G;0.0115|GA/TC;0.0057	3a2840f4-eec8-40d6-83f1-61d93f3a4c69/PCAWG.b2401fd9-439a-415a-a6a9-7210940641de.bam	8b03f2db-055b-41cd-869b-5068b9362b9a/PCAWG.fcbb51f3-02bb-477e-b7c4-38730f708ae3.bam	7620324	230	3e-05	9015	1483
feccc27e-5c2e-4339-8746-0945fee93c1e	HN	187830	84	0.0004	A/T;61|AC/GT;8|CA/TG;4|C/G;4|AT;3|TA;3|GA/TC;1	A/T;0.7262|AC/GT;0.0952|CA/TG;0.0476|C/G;0.0476|AT;0.0357|TA;0.0357|GA/TC;0.0119	8ab467a1-0f0d-4085-84ef-2dc167c4d594/PCAWG.0b22fc10-30dc-47ba-8ccf-25b0cfe443cb.bam	db3f8ed3-edef-48b0-9f1f-ec4078078c5b/PCAWG.db1c7fe4-8a15-4671-ae20-987d5aa593d8.bam	7527485	144	2e-05	3659	1051
1db83e80-bdf7-4d8d-8008-bd8406d641fc	HN	193979	128	0.0007	A/T;108|AC/GT;6|CA/TG;4|C/G;4|AG/CT;3|AT;2|TA;1	A/T;0.8438|AC/GT;0.0469|CA/TG;0.0313|C/G;0.0313|AG/CT;0.0234|AT;0.0156|TA;0.0078	8fa5b214-dd33-4d9c-8efc-da4ba2aa2764/PCAWG.5f48841c-6a82-43db-b85b-dea25f332dcd.bam	38db2573-a551-4382-ab3b-f432eb84e537/PCAWG.5a67ad74-aefd-4882-bff3-0dd30582781c.bam	7614794	232	3e-05	15301	2117
29fc38aa-f367-46a3-a14d-a5f657ad0caa	HN	194640	104	0.0005	A/T;100|CA/TG;3|C/G;1	A/T;0.9615|CA/TG;0.0288|C/G;0.0096	2e04ef6f-e324-47e3-9d94-18d3d5f98ebc/PCAWG.a4810e79-175e-4265-a121-e02ffb961d67.bam	790ca244-4856-4f0d-ae38-79fa94ca8e4a/PCAWG.a8b0ef82-b285-4ffc-8d27-bd0e848ef133.bam	7576363	135	2e-05	4574	1346
6bbd66dd-efee-4d6e-b02f-f88e98526b82	HN	179943	45	0.0003	A/T;37|CA/TG;4|AC/GT;2|AT;1|GA/TC;1	A/T;0.8222|CA/TG;0.0889|AC/GT;0.0444|AT;0.0222|GA/TC;0.0222	ac3642d0-db75-4c24-b0f5-f149d67ee74a/PCAWG.2d6ae7b6-ff7d-41ca-9991-69342b8d215d.bam	3dd2adde-7cd3-480b-9b23-53272648b0b3/PCAWG.e68888a6-8b80-4279-a457-bed2b539b971.bam	7436762	67	1e-05	5888	664
e52ffa79-557a-4024-81f3-f3826c227ec5	HN	197944	251	0.0013	A/T;240|C/G;4|AC/GT;3|AT;1|AAAC/GTTT;1|CA/TG;1|AAC/GTT;1	A/T;0.9562|C/G;0.0159|AC/GT;0.012|AT;0.004|AAAC/GTTT;0.004|CA/TG;0.004|AAC/GTT;0.004	20476846-6456-4f05-b2b4-3d4c1e5062e0/PCAWG.a2cb782e-afcc-426e-8827-f677a4cbd243.bam	ed208deb-fdbc-4b2b-b91a-751ab803cd95/PCAWG.4fc25bde-394a-4e35-9e2d-1a5c77ba7a7b.bam	7633152	395	5e-05	36624	2787
ef673d3d-2031-4036-ba25-4bc7ef04075b	HN	190703	92	0.0005	A/T;75|TA;4|CA/TG;4|C/G;4|AC/GT;2|AG/CT;2|AT;1	A/T;0.8152|TA;0.0435|CA/TG;0.0435|C/G;0.0435|AC/GT;0.0217|AG/CT;0.0217|AT;0.0109	47e3b478-8f94-4c9b-a699-165d0278951a/PCAWG.709f827b-babd-45cf-920c-4a410fd8d16b.bam	e8f1d5b9-a820-4cf4-a5f6-3ef8cececa88/PCAWG.3a0d44b3-5f33-470e-a486-93a98be1b67a.bam	7542812	149	2e-05	8272	1073
dd67dec6-35dd-4efe-b913-ed4884855365	HN	198270	170	0.0009	A/T;166|AC/GT;4	A/T;0.9765|AC/GT;0.0235	31afad26-e2bc-4ce5-8eab-3eaceb7387d4/PCAWG.e9f22625-6853-46d8-82e8-40de51d0aaf9.bam	008234b5-c53c-4d7d-82fb-829dc01923ce/PCAWG.b9a2d1dd-1241-4a4e-b692-8b20d1a1e29c.bam	7644755	233	3e-05	7053	1454
81598359-24d5-4a8b-a6e6-7a6f94289119	HN	194666	99	0.0005	A/T;76|GA/TC;7|AC/GT;5|CA/TG;5|AG/CT;4|AT;1|C/G;1	A/T;0.7677|GA/TC;0.0707|AC/GT;0.0505|CA/TG;0.0505|AG/CT;0.0404|AT;0.0101|C/G;0.0101	cbe2d191-5494-4b87-9c3f-a853ada92142/PCAWG.1f48b87c-c987-42fc-88ce-286aab2c8f10.bam	dd54e0f9-42ad-4b45-b492-b8d33afadd59/PCAWG.598e15ee-ecf2-4ca3-95e8-a11fd94ea091.bam	7611551	155	2e-05	7442	1380
c0812962-a345-48b7-aec0-01336c2d1eed	HN	197037	68	0.0003	A/T;63|CA/TG;2|C/G;2|AC/GT;1	A/T;0.9265|CA/TG;0.0294|C/G;0.0294|AC/GT;0.0147	cc2d0671-be79-4049-bfba-840c56b620be/PCAWG.c8d17103-3a0c-4f33-8268-a60182dbe338.bam	83dc257e-13a2-4099-be22-6647017d88c5/PCAWG.49d80430-1b6b-47b0-82a6-06e36848323f.bam	7625257	91	1e-05	4272	1178
1fff8b62-534b-4d71-a65f-e5f93b8b50ed	HN	198166	157	0.0008	A/T;148|C/G;5|CA/TG;2|AC/GT;1|TA;1	A/T;0.9427|C/G;0.0318|CA/TG;0.0127|AC/GT;0.0064|TA;0.0064	3e2c6c1b-66cd-48a5-b9ed-09263ae0db44/PCAWG.9e028a0d-bfbc-4f09-b6e8-2fedb50e9747.bam	8d032ec2-44d8-43ba-bbe4-69fff61218d4/PCAWG.90697135-943c-4533-a1a9-48b1ff25601b.bam	7637611	226	3e-05	19500	1864
02c6a893-49c5-49d1-8eb1-195021e70d52	HN	189812	80	0.0004	A/T;67|AC/GT;5|CA/TG;2|C/G;2|GA/TC;2|TA;1|AG/CT;1	A/T;0.8375|AC/GT;0.0625|CA/TG;0.025|C/G;0.025|GA/TC;0.025|TA;0.0125|AG/CT;0.0125	b75376f8-2595-4fe1-9271-415ae26e5b9d/PCAWG.7869af5c-3a91-4d7c-a938-80beddd72608.bam	10385021-7d4e-4154-b261-00becffc9d02/PCAWG.d9ca4870-8cf2-45a3-aaf1-952ac9463646.bam	7557928	120	2e-05	3756	896
83eca7b5-45bb-44c0-8afe-36f8988d0078	HN	189811	72	0.0004	A/T;55|CA/TG;5|AC/GT;4|TA;3|AT;2|AG/CT;2|C/G;1	A/T;0.7639|CA/TG;0.0694|AC/GT;0.0556|TA;0.0417|AT;0.0278|AG/CT;0.0278|C/G;0.0139	20b3ce7b-ea42-466d-8713-d581722dcad9/PCAWG.bfc2690f-242b-40ca-96bc-2c162b9c3662.bam	4cbbaa4a-5ded-49ee-8fd3-e1b931238c40/PCAWG.70ead34e-2b1e-4a28-986e-8862c4611e87.bam	7576217	108	1e-05	15954	1021
1727e88b-df0a-4af2-9191-8c6061d98ad0	HN	198169	143	0.0007	A/T;137|TA;2|AC/GT;1|AT;1|AG/CT;1|C/G;1	A/T;0.958|TA;0.014|AC/GT;0.007|AT;0.007|AG/CT;0.007|C/G;0.007	ab1b4e97-fd7e-480e-8ddf-df18c380de6a/PCAWG.e623fefd-bedf-4ade-86f1-7a03cdce4a46.bam	e71f6179-d644-4668-b15a-468fe9341ceb/PCAWG.c867cb1d-1d33-43ea-9897-05f401bd8801.bam	7645467	201	3e-05	10555	1557
0e6ca8dc-0f31-4675-95b1-5920576daeff	HN	191426	136	0.0007	A/T;132|C/G;2|AC/GT;1|CA/TG;1	A/T;0.9706|C/G;0.0147|AC/GT;0.0074|CA/TG;0.0074	af46c683-3c72-40b4-bafb-ec6c62373155/PCAWG.8642829e-a04f-4ddd-be41-8f67fe4c4b79.bam	445e4094-ade5-4eda-8b7e-d8218888acaf/PCAWG.8f43da7a-8fc7-4e9f-aea6-84127457238e.bam	7525096	195	3e-05	7386	2048
ab923db7-54e8-4a50-b7fd-c2b4b300041e	HN	195838	128	0.0007	A/T;123|CA/TG;2|C/G;2|AC/GT;1	A/T;0.9609|CA/TG;0.0156|C/G;0.0156|AC/GT;0.0078	5dcbcfee-66cf-4d29-8561-0d072550d77b/PCAWG.a3b32a24-0459-4a08-80a7-a5fc691778ec.bam	592dab4d-5db9-4bb1-9075-8f82f958b908/PCAWG.99955741-e034-44f0-8dde-f66dd7f339a9.bam	7592199	189	2e-05	24632	2252
9988eb07-01f6-4f83-8699-bb63e0525f08	HN	191879	177	0.0009	A/T;160|C/G;7|CA/TG;6|AC/GT;4	A/T;0.904|C/G;0.0395|CA/TG;0.0339|AC/GT;0.0226	980d6ec4-1c64-480a-ae8d-753729f3ce98/PCAWG.7a59f1c7-3ec3-4ed9-8a8e-1b9300fc937a.bam	5adee057-6582-4c93-a496-855abeef241b/PCAWG.10e88fc1-ad11-4612-a050-3ea1f12f5f74.bam	7448509	362	5e-05	59852	3865
c2124bb2-30e1-4093-9a8a-3a188a6dc0a9	HN	197713	124	0.0006	A/T;117|C/G;3|TA;1|AG/CT;1|CA/TG;1|CAAA/TTTG;1	A/T;0.9435|C/G;0.0242|TA;0.0081|AG/CT;0.0081|CA/TG;0.0081|CAAA/TTTG;0.0081	de3ec59a-1d17-4c4b-b75f-bdf307bb6edc/PCAWG.e4e4175b-f96c-47b6-a494-c087b3432e0c.bam	faca7675-67fe-441a-b8d5-332188298a4d/PCAWG.5623ebea-0556-465b-bcc0-70978eba10b3.bam	7620100	207	3e-05	15158	1856
21205681-a0c7-48d0-81d4-0b7ef31158cf	HN	196908	326	0.0017	A/T;316|AT;6|C/G;2|AC/GT;1|GA/TC;1	A/T;0.9693|AT;0.0184|C/G;0.0061|AC/GT;0.0031|GA/TC;0.0031	1cb2581f-e9ce-41f9-8d78-d6fd408b73d8/PCAWG.67f559a3-0c79-4be1-b177-d868acb69df2.bam	95d04d05-a2b2-4c1e-835a-8b029cb6bd3e/PCAWG.c67b59a1-53df-4e40-906c-c8c601536b20.bam	7606803	504	7e-05	54718	2596
54e78de0-d357-4125-a904-ab35e461572b	HN	197678	74	0.0004	A/T;67|AT;2|AC/GT;2|C/G;2|AG/CT;1	A/T;0.9054|AT;0.027|AC/GT;0.027|C/G;0.027|AG/CT;0.0135	539dc759-7cae-4003-abb9-f9b2eacb82ce/PCAWG.12fdfa30-3b70-4b2d-b507-d2e130a5e6ab.bam	e0ba9d3b-3e26-426e-aa3d-deee82058947/PCAWG.b8d16018-7fd2-4d8a-af89-fc88cfe3d597.bam	7629532	133	2e-05	15813	1559
d25a4c65-9cb4-4611-909e-e68f93408d84	HN	197886	394	0.002	A/T;378|C/G;11|AC/GT;1|AT;1|TA;1|CA/TG;1|GA/TC;1	A/T;0.9594|C/G;0.0279|AC/GT;0.0025|AT;0.0025|TA;0.0025|CA/TG;0.0025|GA/TC;0.0025	6bff7f08-d227-4193-8419-9f844ea45e07/PCAWG.5193df14-1091-4948-985c-3fd8f5032c12.bam	941036f0-08af-4092-b6eb-0a8a749bbb6e/PCAWG.9b1e7070-cc34-4b63-9ea5-e5f812a4e8dc.bam	7627297	591	8e-05	30474	2804
b86e88e7-0d5f-4b32-a35f-dc97251ab990	HN	198394	54	0.0003	A/T;51|TA;1|CA/TG;1|C/G;1	A/T;0.9444|TA;0.0185|CA/TG;0.0185|C/G;0.0185	594f8405-912b-4a0f-a75e-296f813ff281/PCAWG.3c15988d-63aa-4c02-9888-d64200e8e233.bam	4520166d-d562-4206-a498-639f1a54cdd0/PCAWG.5bd480d4-153a-4e6e-820a-548dfa963af4.bam	7646036	81	1e-05	10522	1269
08227616-02a5-46e8-9db1-f2d1d691ab23	HN	197869	59	0.0003	A/T;57|AC/GT;1|CA/TG;1	A/T;0.9661|AC/GT;0.0169|CA/TG;0.0169	c96711d5-75c7-465f-a5d0-2dee0e6cae17/PCAWG.b84b3813-ef9b-40ad-95d4-540a952b9acc.bam	c8a3cf66-50d9-4c13-afd0-fb607cac8b1a/PCAWG.df4683af-8b1d-4e0a-a8e7-5189c32bffea.bam	7627301	99	1e-05	14487	1413
3e604a1c-b95f-44ff-9723-e2fac845da3b	HN	198210	174	0.0009	A/T;155|CA/TG;11|C/G;6|AC/GT;2	A/T;0.8908|CA/TG;0.0632|C/G;0.0345|AC/GT;0.0115	effbe6ce-49ab-4c54-a198-2e73163f4cc8/PCAWG.06075f42-8b30-47ad-bdf8-44eaaf93353a.bam	cae6555a-7d68-4900-9b9c-b2f5375c9ff1/PCAWG.1989963d-b3ab-4e2f-aa3f-5a419769ca59.bam	7639241	422	6e-05	97721	4860
d72a7338-c144-4c62-a70e-2177a3b4b77e	KI	163938	1	0	AC/GT;1	AC/GT;1	6a8a7637-d0b8-4519-b33a-1efd7d980a27/PCAWG.6fd2588d-40a0-47ca-a9fe-8ee5dab84371.bam	2a2901c3-c972-4517-a796-e5036a83dd30/PCAWG.264d7a6d-a5a6-4aaf-9702-ecc6f594b409.bam	6712473	2	0	2746	1561
c56505cb-e150-408d-9df6-3af4e608c376	KI	191608	6	0	A/T;4|AC/GT;1|CA/TG;1	A/T;0.6667|AC/GT;0.1667|CA/TG;0.1667	b920e4f3-d79e-4d83-9777-08fbcdff5715/PCAWG.f873ac33-9056-4efe-8205-847217a3ec91.bam	ec43ee40-48a6-429e-9c84-627dd5206a04/PCAWG.1ced6738-aeeb-49e9-885c-c4eec0dad990.bam	7411787	10	0	2116	828
4729fe4b-c1ac-489b-a67e-91e5c5e3ff8c	KI	195858	2	0	A/T;2	A/T;1	64f315ac-fbb3-4751-96fb-612aa4a3b984/PCAWG.a84aa2a6-bb88-458f-80ec-abd0de9c7c48.bam	cfda6685-4ca5-459c-a173-aaaaf25b8da4/PCAWG.ba1d09ad-c4af-44e5-b635-86a63641dd42.bam	7563543	5	0	2626	1389
93b51c61-6eea-4228-a102-840a2e118522	KI	193350	9	0	A/T;5|AC/GT;2|AT;1|CA/TG;1	A/T;0.5556|AC/GT;0.2222|AT;0.1111|CA/TG;0.1111	c542dcf4-1eae-4512-9aa2-be1f3fb8109f/PCAWG.0df001ee-102e-46e6-9dad-9eb56ab5efd0.bam	fcc8745b-29fa-44ee-b5da-406df0d7caad/PCAWG.fd45a5ea-32b6-4f46-bd6b-4d2d831a0b63.bam	7493947	12	0	2132	781
8df1eeb4-dfc9-4a0a-8f93-98460c3ab489	KI	194476	7	0	A/T;3|AT;2|CA/TG;1|C/G;1	A/T;0.4286|AT;0.2857|CA/TG;0.1429|C/G;0.1429	e85fbc0d-c758-49ac-afc9-b1eaa358d29a/PCAWG.beb263a8-a482-4c03-b7db-33f55dcbfd63.bam	5acb52bd-cc89-4cdb-a16e-b64c78239729/PCAWG.6f837360-76bf-4055-940b-5c435bfbf8aa.bam	7527070	10	0	2716	960
0c7af04b-e171-47c4-8be5-5db33f20148e	KI	154781	10	0.0001	A/T;5|CA/TG;3|AC/GT;1|AG/CT;1	A/T;0.5|CA/TG;0.3|AC/GT;0.1|AG/CT;0.1	c93832a2-920f-4f60-87aa-464c6e5270cc/PCAWG.47187a57-68f9-44c2-8e11-87e2169d43a1.bam	5ebc0a85-09b3-4f93-b484-6e4581d17db9/PCAWG.143bbe67-5962-448d-84e7-ebb517ce36b9.bam	6257098	13	0	2492	1358
9d29543e-8601-4fd0-8e76-3df3de465cab	KI	150500	6	0	AC/GT;2|A/T;2|AT;1|TA;1	AC/GT;0.3333|A/T;0.3333|AT;0.1667|TA;0.1667	4f58250a-9ebe-4a5b-9c6a-f804be2d1add/PCAWG.88eb7362-ea2f-43e7-861d-e9b70dce04f3.bam	ab98704c-5a3d-494d-ba3b-85a5c37b0828/PCAWG.df7ec290-c137-4a78-93f2-c0e15bf6b3b1.bam	6055578	10	0	3255	1031
09537dce-c797-4b60-962a-d4c3cd6ab00a	KI	191978	9	0	A/T;8|AT;1	A/T;0.8889|AT;0.1111	38b7080f-2a3a-4a8e-8685-5b79bb3fffbc/PCAWG.603e60c3-f4f6-4043-b75b-f663759a962b.bam	f3a54591-51e3-42ed-91d5-4cbab69076bd/PCAWG.2cc6ce6e-9a03-4220-8246-0eff162361f6.bam	7420603	14	0	4133	1205
64f696a6-58b2-40a8-b848-fd775cd52529	KI	181603	6	0	A/T;6	A/T;1	1f7b2279-af52-44da-81db-2af98e367107/PCAWG.fbf025fc-7208-4e5a-b677-30380cab478d.bam	4559644f-7e71-4a63-b5a4-e5939f7cfefa/PCAWG.a1ca9bb7-aef1-4a3c-869e-e1a199e5fbe1.bam	7018262	10	0	2732	943
148536ce-ee2a-4952-a19d-10d6f44146b9	KI	193966	5	0	A/T;3|TA;1|CA/TG;1	A/T;0.6|TA;0.2|CA/TG;0.2	f3ff5b3b-9156-4263-b31d-181ee1bb9487/PCAWG.9d9376ca-38b7-4d83-82b3-338d2c803db4.bam	78e21cbe-66d6-413e-b439-91a8eb7d25ff/PCAWG.c755f36f-593a-4beb-8ac4-bd1861135a48.bam	7506852	21	0	3186	1027
0b811c6a-8f05-44bd-ac33-fb720d189e71	KI	197686	8	0	A/T;7|AC/GT;1	A/T;0.875|AC/GT;0.125	ccd2cf58-1012-424d-94e9-a6b11b19a15a/PCAWG.c865bc20-46ac-47bc-a346-d5d12dc3e866.bam	9aa62faf-8c84-4ff0-9a7c-79ba22350042/PCAWG.60a4935d-f899-4be2-aa93-61c9a64f7758.bam	7623246	14	0	2673	814
c00de7a0-0b09-4e07-988c-ef2a7f8e932a	KI	197262	7	0	A/T;5|AT;1|CA/TG;1	A/T;0.7143|AT;0.1429|CA/TG;0.1429	5e17a465-5234-4ab3-b399-c225699856df/PCAWG.13e1ffcf-3f08-4378-bcf7-544a8a9a9462.bam	ab1f15a3-a74b-4398-a3a6-8360319ff820/PCAWG.4df34d54-6036-45a8-96b6-fc5e53f0cb97.bam	7610181	17	0	3646	861
ba686386-8113-4885-b20f-6ad09a295604	KI	190479	4	0	AC/GT;2|AT;1|AG/CT;1	AC/GT;0.5|AT;0.25|AG/CT;0.25	cf7f0a19-eb5f-4765-8066-6b0823c3a666/PCAWG.3d319304-778c-4d0f-8b9c-2d0ee532d1ba.bam	c010aeab-c25e-46de-971a-c94993546fbf/PCAWG.959280eb-f0df-48d2-b93a-2ad7319d69d0.bam	7419679	6	0	2248	1243
d113ce88-04ab-4675-b363-92f80c28de34	KI	196197	2	0	A/T;1|C/G;1	A/T;0.5|C/G;0.5	f4e10375-5894-4a09-b61b-970029184284/PCAWG.8d0cf601-a0b2-4c43-9525-1f3c1811c248.bam	d34b4f51-3919-4bc5-b158-5bdc21fa08ee/PCAWG.f7603c86-d882-4e46-bdbc-6322acef20e6.bam	7555055	3	0	1690	728
c6d6f49e-6e95-4e41-8388-71f6fe017d80	KI	193858	4	0	A/T;2|AC/GT;1|CA/TG;1	A/T;0.5|AC/GT;0.25|CA/TG;0.25	2f5ce9f7-de3d-4665-b7e6-d2970212c7b2/PCAWG.cf070965-d3e5-4d24-9b87-d0d17825ac81.bam	b121713c-2d8c-49da-85b8-d4d1967b7462/PCAWG.6c2d192a-74a2-4f96-bfbc-ac65ff729bcf.bam	7485044	9	0	2559	940
9fb73d89-f7c4-47b2-810b-3ce37cd8a3c9	KI	196698	3	0	A/T;2|AC/GT;1	A/T;0.6667|AC/GT;0.3333	a7e74eaa-bf07-49d5-8461-f3d179566588/PCAWG.03085a73-2fd8-4896-b4ec-885f250024d4.bam	3a36cbbc-fda9-464f-85cf-aa738b8bf2d6/PCAWG.06f297f6-830b-4a56-a9e0-57d9ced0242d.bam	7594731	15	0	2648	908
2ccd028d-e7e0-4f77-a512-f658a31819a4	KI	195606	6	0	A/T;3|AT;2|C/G;1	A/T;0.5|AT;0.3333|C/G;0.1667	d0701487-6a7e-4d9a-a157-31f010a67b6c/PCAWG.4e7d7b6e-e8c8-4eae-b41a-6093a11aa67e.bam	3d8f2f1a-e2ab-423c-84a8-ebbc9c20802e/PCAWG.fcc82015-05f7-4068-92e2-13bf9e08c501.bam	7554936	15	0	2766	1009
322f0b01-2118-4dbe-aba1-3875a54ee71b	KI	193355	1863	0.0096	A/T;1844|C/G;15|AC/GT;4	A/T;0.9898|C/G;0.0081|AC/GT;0.0021	5e36350c-1f2e-48bd-9f93-a70984cdc8cb/PCAWG.6cb41cca-4c1f-46a9-9dfa-619120d4c9f5.bam	d42a36da-9981-4d2a-9aee-665a7e4e795c/PCAWG.a182d00d-bb33-489a-b4f6-050b0a81ecb7.bam	7485415	2181	0.00029	48099	6209
d648c804-4eaf-4252-8b6f-13378158a07d	KI	194370	4	0	A/T;2|C/G;2	A/T;0.5|C/G;0.5	512c7390-4220-4a5c-898a-33405def65f9/PCAWG.11979506-1dd8-4e89-9037-4baf71857a16.bam	08bec814-3ea0-48f9-bcad-4ae2113aba0d/PCAWG.9699fc0b-9873-43ae-9bc0-516c7b04e85d.bam	7522459	6	0	1876	684
5bebc389-de0d-45b8-9d2f-6476988c358a	KI	196690	10	0.0001	A/T;7|C/G;2|CA/TG;1	A/T;0.7|C/G;0.2|CA/TG;0.1	c8c3a96d-d316-4ebe-9cc2-de9f728d5bc4/PCAWG.3493c5f5-f22e-4999-bed7-718ce2d74c4b.bam	b16f3316-8cda-4299-8343-f61f8ff9d8ae/PCAWG.85a52795-2116-4a71-bae1-dc4018e93551.bam	7599173	14	0	2813	796
a3fd2ee0-3dd0-4992-9a9f-75e487b43441	KI	193935	7	0	AC/GT;2|A/T;2|CA/TG;2|AT;1	AC/GT;0.2857|A/T;0.2857|CA/TG;0.2857|AT;0.1429	d459fa7c-2ec6-462b-9b66-2983ca850c35/PCAWG.49a98d1d-af37-468f-a405-ef823d241b97.bam	25d019ce-09c7-4965-aeed-13e567defaf6/PCAWG.204c1a45-2254-4b5a-ba94-eeb8f868d275.bam	7487132	9	0	2624	1009
9fc0e0e8-1b0f-400c-b4cf-126193283695	KI	168152	3	0	CA/TG;2|A/T;1	CA/TG;0.6667|A/T;0.3333	e64f1833-c132-4d4b-becd-422d5fc87a13/PCAWG.9f9d5492-fcf3-409c-b156-b0dd8ebf7f70.bam	b2408346-bf7c-4258-8233-08ce7efc4b19/PCAWG.52861726-be7e-4e72-a9a9-931362609ed2.bam	6551421	6	0	2704	1491
e9032df3-8692-4146-a867-b9b64c9b310a	KI	189010	6	0	AC/GT;2|A/T;2|CA/TG;1|C/G;1	AC/GT;0.3333|A/T;0.3333|CA/TG;0.1667|C/G;0.1667	e822ab7c-346a-4d86-90c8-ddd842568cbb/PCAWG.5e0271d3-ead4-4439-9837-1391d56fb273.bam	bc29473c-f8cb-4831-86bd-ca22b04c383e/PCAWG.01550f60-b5e2-4964-8fda-db5a3554562a.bam	7371053	13	0	4911	999
9d3b0b87-5fc5-4d09-9c63-4d5fc4bc46d0	KI	198264	8	0	A/T;8	A/T;1	9998cdf3-710e-4ce4-a921-82b5ee6006ca/PCAWG.7c05e2a7-605f-40d4-a54c-c62c8f7d70da.bam	b3a9f7ce-e1ec-4447-888d-406779746a25/PCAWG.19d5d095-c5e2-40bf-8273-2a49532104ff.bam	7639630	8	0	1045	801
fae88d21-171c-4df4-b258-3c5948a1034b	KI	186264	14	0.0001	A/T;10|CA/TG;2|AT;1|TA;1	A/T;0.7143|CA/TG;0.1429|AT;0.0714|TA;0.0714	96a7a9ba-f999-4c6a-b5b4-7d52e9db175f/PCAWG.8d9ebd2e-9ac6-4d93-81fb-5cfe6f4a4e7a.bam	b0f0323d-667b-4fc7-862a-5c37845af95e/PCAWG.95f31dd1-0014-4f11-b866-f6bf5cb152c8.bam	7274091	25	0	3435	1416
cdf313c8-59f9-41c6-9bd2-f47cb4287da5	KI	191283	8	0	A/T;5|AC/GT;1|CA/TG;1|C/G;1	A/T;0.625|AC/GT;0.125|CA/TG;0.125|C/G;0.125	8c76406e-a711-4fee-9f63-2f275c918ab4/PCAWG.ea6be3f5-78ee-4eb1-9a9a-90abe97b046e.bam	4e54a7fc-6291-4bf5-be58-f076bb4c7103/PCAWG.d75ab915-4372-4f05-9b61-2bf5b373a7d5.bam	7424977	12	0	2441	698
7087a2b6-7fc4-45b0-8c48-248864f03deb	KI	188318	6	0	AC/GT;2|A/T;2|AT;1|C/G;1	AC/GT;0.3333|A/T;0.3333|AT;0.1667|C/G;0.1667	efdb3199-ac20-4f52-8b64-283afe5e0611/PCAWG.906d13d0-f87a-4888-82ec-f272fa9a367c.bam	14173ea2-33de-422d-97f8-e9f8479eefc8/PCAWG.4ee0fc53-8037-4579-9162-569235973a70.bam	7295245	11	0	2950	897
1e8ae8dd-74c1-44d5-a74e-bfdce801c736	KI	190489	11	0.0001	A/T;7|CA/TG;2|AC/GT;1|C/G;1	A/T;0.6364|CA/TG;0.1818|AC/GT;0.0909|C/G;0.0909	9f9b3525-9c19-4ae1-8fb1-6e9cbb54c6bb/PCAWG.fba4f312-17ba-4de3-bc61-32a0b8da509f.bam	dac84278-0d62-4f59-8aa2-3ec1da1d5ef9/PCAWG.78dce513-ee74-4d0b-b809-195d961f7f56.bam	7441075	18	0	3017	1250
07e0e938-f61f-477a-92a2-5b7e74b78943	KI	197477	66	0.0003	A/T;63|AC/GT;1|TA;1|CA/TG;1	A/T;0.9545|AC/GT;0.0152|TA;0.0152|CA/TG;0.0152	59e6b34a-57ec-4a31-a236-e215b4cf999c/PCAWG.6c8bc4a0-5aee-4cfd-96b6-3529ecd41a45.bam	29218362-fba5-4933-9fda-5bb0f9e3df13/PCAWG.5403e92f-caf8-43d4-b22a-3850e8f16847.bam	7612967	97	1e-05	11589	1120
4ecbfd89-393f-4126-aa1c-951a2c23ef89	KI	195416	4	0	A/T;2|CA/TG;2	A/T;0.5|CA/TG;0.5	dfd5418a-d360-4a07-a1a3-5c59a23bc970/PCAWG.445a5a50-3053-4826-8f39-78b974c6a4e5.bam	efcacf3a-cfda-46bf-8665-2fadc1d304f7/PCAWG.40526b6a-a013-442c-af36-db3bd509a520.bam	7560823	11	0	2240	800
c29f6ed6-880d-4f03-977e-1087738e5e60	KI	152710	6	0	A/T;4|AT;1|AC/GT;1	A/T;0.6667|AT;0.1667|AC/GT;0.1667	926a83b4-8360-45fa-a6b7-a3ab93c1b79f/PCAWG.032c53ec-b250-4a4e-a192-244172a33a6d.bam	8bf8db1c-b85b-464f-aea1-03ede1a84c91/PCAWG.be067f80-0365-4c40-96a3-5a8f9d016982.bam	6179113	8	0	2426	1054
94434272-4cbd-4b4d-bd98-44f18526dd69	KI	197216	8	0	A/T;6|CA/TG;1|C/G;1	A/T;0.75|CA/TG;0.125|C/G;0.125	cbc626b9-46bf-406f-8ab6-4d208eb5504a/PCAWG.e2818ea8-09d6-4f7f-817a-3399e1da8f8c.bam	628266bc-f0f3-45d7-95cc-20740a1875f7/PCAWG.17cf4b89-6cab-4bf0-af54-052c146fa448.bam	7603097	16	0	1725	962
bd2ec47b-a120-4b3b-b10d-aee09805ab33	KI	191835	9	0	A/T;6|AT;2|CA/TG;1	A/T;0.6667|AT;0.2222|CA/TG;0.1111	da3bb6fa-9ea5-4448-b732-98ce41146c13/PCAWG.a440c791-09a0-4ece-a66f-68ffe3f46ed3.bam	2bfa7eb3-8a3f-4f88-b101-4e36b6b1cc16/PCAWG.c425d7c7-e5e1-4297-9916-5c986784e17d.bam	7459427	17	0	3147	1197
3ace181a-23bd-424e-a87e-e0c01a2a2cb8	KI	197229	6	0	A/T;5|AC/GT;1	A/T;0.8333|AC/GT;0.1667	238b1d76-5827-4188-b218-1b45b8530365/PCAWG.9c53c1a9-33ff-41c5-93b6-c650f15b8db7.bam	43234030-fa15-495c-b403-b36e44cf19e6/PCAWG.73c81eb4-9cd4-4d4c-9109-1cbfeb41c73c.bam	7612525	14	0	1912	668
85ed2434-da94-4333-90ca-6ca4691cbdd3	KI	195104	5	0	A/T;4|AT;1	A/T;0.8|AT;0.2	d9fbdf7b-efd8-4e1a-bbfb-f9c5f30d3be8/PCAWG.1989cb4e-a8ef-4124-878c-702efce4623d.bam	5dbde156-6ec8-4bca-b24b-5915c743c895/PCAWG.1140c365-43fb-4285-9543-37aa5220c971.bam	7540565	15	0	4537	1016
a3deafcb-b54f-4b7e-89ac-c92c16fb919f	KI	191318	9	0	A/T;5|AC/GT;2|CA/TG;1|C/G;1	A/T;0.5556|AC/GT;0.2222|CA/TG;0.1111|C/G;0.1111	f53f22a8-ee00-4198-ba03-c56d2d67f2be/PCAWG.6da70ad8-8968-494b-9b10-6099125221f0.bam	6d557385-91de-407e-9ba7-b36ee2ebc4b4/PCAWG.9af76d5a-a297-4387-a238-6885372cdb13.bam	7418680	17	0	3411	652
34739bd6-b3be-441d-8cdb-e4233bf14080	KI	197362	6	0	A/T;4|AC/GT;1|AT;1	A/T;0.6667|AC/GT;0.1667|AT;0.1667	77f828c1-cbad-437f-97e3-2ae527196743/PCAWG.9ff27e1a-5657-4e8b-8b0b-920c146932af.bam	69145eed-c0c2-4be9-9bea-f9f01c034495/PCAWG.66b44383-6d59-4b0e-818d-d20080aaa44b.bam	7611578	10	0	2435	607
798bd17b-69b7-40d7-92ff-7c2389edcccf	KI	195867	7	0	A/T;5|AC/GT;1|CA/TG;1	A/T;0.7143|AC/GT;0.1429|CA/TG;0.1429	df35612d-1be6-42af-9561-fb4b4dcf6eb7/PCAWG.09343c19-954d-4bd7-9612-0538bce7de93.bam	2d0a6ad1-ce0c-4c25-a8cf-6f802e1ff283/PCAWG.db11dd2d-ebe8-45fc-ab16-78608ad4ee92.bam	7554933	11	0	3348	1384
f38fc6ac-2af8-4d89-a514-4e2c5fdf08de	KI	182571	8	0	A/T;6|AC/GT;1|AT;1	A/T;0.75|AC/GT;0.125|AT;0.125	3ebee402-8daf-4eb9-bf9f-0d8aea9f486d/PCAWG.45bf7cc4-27d4-4f5e-a9b6-94d4ddbdce26.bam	b97e9dd6-9321-4395-81ae-ca7ae25097de/PCAWG.fd06d198-82f3-4d8c-b82e-9ac45d9224f7.bam	7207107	24	0	2513	1336
81bb13fc-f082-4c0b-8066-1729f11ef617	KI	195911	6	0	A/T;2|TA;2|AT;1|AC/GT;1	A/T;0.3333|TA;0.3333|AT;0.1667|AC/GT;0.1667	2c923ce9-4c66-488e-8aea-d9351a9d2033/PCAWG.55055d5b-eaba-47a6-8f6f-89141855ae76.bam	edb43de9-5cad-4b39-9ff8-b72ef87f85de/PCAWG.1feb9cd2-988c-4747-9964-59164946f9dd.bam	7572177	10	0	1724	919
6400c324-2c94-477d-acb9-669d4ea46f1e	KI	197842	2	0	A/T;2	A/T;1	606f62a6-9c59-47ac-9cfc-90aab8651ba9/PCAWG.28910fb1-918f-4ca5-b9d2-1da4bf2f23e9.bam	57afc360-f8f2-40b2-b636-c91e9f1c0a11/PCAWG.4b5eb5f4-5eb5-4f3c-bec4-e934d9069d6a.bam	7626877	5	0	1968	747
a592e80a-3b1a-46aa-be30-bcd87d6bca6f	KI	196776	7	0	A/T;3|AT;2|AC/GT;1|CA/TG;1	A/T;0.4286|AT;0.2857|AC/GT;0.1429|CA/TG;0.1429	01490401-1e77-4be6-93b5-56b153f78778/PCAWG.0b5957ff-db66-4b8e-8863-3d6413244397.bam	230a3408-47c8-4078-ab5f-b6d11a85e3e3/PCAWG.caf4a902-c496-4d00-aa41-a2ff1bd252ab.bam	7596228	11	0	3537	1032
24f887e1-ce82-40f3-9674-11102bd076c0	KI	187895	7	0	A/T;4|AC/GT;1|TA;1|CA/TG;1	A/T;0.5714|AC/GT;0.1429|TA;0.1429|CA/TG;0.1429	c9510c0f-cbaf-40d7-8180-745b173dd89c/PCAWG.c3ca3471-a008-4950-9ca3-375ffdd187b5.bam	c17ad7c4-4f75-4efd-a82b-f809ee83c8b3/PCAWG.a785a8f7-c849-44c0-b03f-cc300dae9461.bam	7377111	15	0	2944	888
9dfcbabf-2bc0-43a2-bdde-d0b2aaca3f6b	KI	171441	9	0.0001	A/T;7|AT;1|TA;1	A/T;0.7778|AT;0.1111|TA;0.1111	dd528df2-49a6-4f15-80b1-bdc1bd196bff/PCAWG.69419084-c714-44bb-a9df-0f777495031c.bam	d78a0ebd-97a8-418a-baef-26bca35eb78e/PCAWG.08193903-19f8-4a0e-9ebf-6bb9c84d5691.bam	6846105	10	0	2695	1248
345a06d6-fa5c-4674-a847-88a6b537cf3c	KI	197581	9	0	A/T;9	A/T;1	a788dc6b-1018-404a-87d2-a25ae97a5729/PCAWG.1ead95b1-f1be-444f-9d28-3461d8bc643a.bam	86deafcf-117f-44f4-a485-163fe0dc5901/PCAWG.5f65df7b-5031-40c5-9478-8d2d8dba540a.bam	7621286	14	0	1982	1083
715f59dd-a80f-422d-988c-f73f4b987baf	KI	163947	8	0	A/T;6|AC/GT;1|AT;1	A/T;0.75|AC/GT;0.125|AT;0.125	4c321709-a33b-4e8e-81f0-7da1953071dd/PCAWG.4325f1f8-1de4-423e-a544-c5eef49c5b75.bam	71ea0d73-2575-4e65-b3cc-cae4ba11c37d/PCAWG.a095dc08-4817-49ba-ac2e-242427a723b8.bam	6513655	21	0	3253	1695
97c1a300-978d-4df1-9e97-ce2f92b9eff1	KI	198425	4	0	A/T;4	A/T;1	152a9262-d71d-415c-afbb-07832849f8f0/PCAWG.c5ae6e34-7ea0-4279-a9c1-8aeaf19ba769.bam	e84c64d2-bda5-43a9-a3d5-d05c76a490ba/PCAWG.f0366c74-63fc-4569-a191-0a06af88875b.bam	7644225	10	0	1837	602
9a90f951-ad96-4883-b97f-ac43395dae5d	KI	193223	8	0	A/T;5|AT;1|TA;1|C/G;1	A/T;0.625|AT;0.125|TA;0.125|C/G;0.125	1c2b4c8d-9213-4fca-af6d-04b29a3f45fb/PCAWG.677b02b2-a389-4acd-8b35-266590947e87.bam	a4f285b3-4fb3-48eb-bc06-2400399a512c/PCAWG.94ddd24a-20e3-4a0f-908f-6d0424100a21.bam	7492915	14	0	2742	1102
3feac02a-c99f-4dd9-9eff-e4f5e87f7dc5	KI	196267	15	0.0001	A/T;12|CA/TG;3	A/T;0.8|CA/TG;0.2	c21de7c1-c474-42f7-98dc-ba86c1c1ae12/PCAWG.743eaa2e-db6c-4f18-9287-1bece41ca678.bam	64e4f7fd-ccce-47e9-96eb-ff770777b0f2/PCAWG.f663ab4e-1b23-4502-83e1-0b8d039e8fdb.bam	7576937	43	1e-05	4678	1312
f64e9609-d75d-400c-a92d-d77fd54d6c29	KI	191545	59	0.0003	A/T;53|AC/GT;1|AT;1|TA;1|AG/CT;1|CA/TG;1|GA/TC;1	A/T;0.8983|AC/GT;0.0169|AT;0.0169|TA;0.0169|AG/CT;0.0169|CA/TG;0.0169|GA/TC;0.0169	d70ab7dc-94d5-4285-a9c5-01ee037f91ce/PCAWG.cdccdb98-4446-41f2-bcf2-e5459a2e477d.bam	290d8791-2515-4baa-9c5f-60f6ec97f33a/PCAWG.a0218c53-0b70-4940-8e14-cdc7dde9e5a7.bam	7517104	103	1e-05	8306	2277
aad8c8d6-d828-4aac-9cfb-cee893e36850	KI	175753	126	0.0007	A/T;121|CA/TG;3|AC/GT;2	A/T;0.9603|CA/TG;0.0238|AC/GT;0.0159	9c6649ef-a7fc-4f59-8038-5a93e25a5025/PCAWG.75add91f-2b79-45a3-b606-149639973413.bam	00d5c705-d57d-434a-97bc-33a92b5d4e15/PCAWG.58828324-2c5a-4bff-9238-8e05ebf8332c.bam	7169586	175	2e-05	4511	1000
fd74de4d-6973-4597-a541-e8a13d80ad55	KI	146383	123	0.0008	A/T;119|CA/TG;3|TA;1	A/T;0.9675|CA/TG;0.0244|TA;0.0081	3c9a94d0-e233-4f2d-85ea-9439306266ec/PCAWG.6931ccd4-0219-4e02-9b64-ab972c613885.bam	9d3bb204-ebf9-4655-b003-1497f1af15ec/PCAWG.f31328b7-8c00-46d6-847f-02222f2954bb.bam	6178962	157	3e-05	4327	947
9ae0744a-9bc1-4cd7-b7cf-c6569ed9e4aa	KI	196407	96	0.0005	A/T;86|CA/TG;3|C/G;3|TA;2|AC/GT;1|AATGG/CCATT;1	A/T;0.8958|CA/TG;0.0313|C/G;0.0313|TA;0.0208|AC/GT;0.0104|AATGG/CCATT;0.0104	052e22a7-3249-4d5d-acba-70ce32895718/PCAWG.1978ee44-b401-42c7-b26b-e8e0fe005d8b.bam	5e2af1c8-e2b2-48fb-9ebe-cd5cebd0eccb/PCAWG.251466ea-c72f-4004-900f-e6b2d667f7ea.bam	7574124	135	2e-05	4067	696
a56cd282-f6c5-4373-b3d8-676562894598	KI	165820	119	0.0007	A/T;110|AC/GT;4|CA/TG;2|AT;1|C/G;1|AATGG/CCATT;1	A/T;0.9244|AC/GT;0.0336|CA/TG;0.0168|AT;0.0084|C/G;0.0084|AATGG/CCATT;0.0084	4fe43988-1863-4f67-87b0-3cf89c038ec9/PCAWG.d5aca47a-8a2c-4902-b4bd-3201431ce97c.bam	0ab3a99b-dd70-4a35-b035-3071ab62c51d/PCAWG.662b5257-33d4-4af7-8a95-fe19e3802103.bam	6776078	150	2e-05	5202	1061
a54aac0e-4108-49cf-bf50-687031c7cda6	KI	187218	8	0	A/T;4|CA/TG;3|TA;1	A/T;0.5|CA/TG;0.375|TA;0.125	2d4b62d8-f59e-4f3a-9548-ad0ebd7fa1f0/PCAWG.60db1294-b88c-45cd-a86c-0db70aca266a.bam	8934b543-90ba-43e7-a31a-8eb0eb91b2a6/PCAWG.f55f7d2f-444e-4347-9fb9-6f204955d527.bam	7346627	31	0	5106	1290
68b7fdb1-22b5-4152-9e69-a41151640cd8	KI	195078	64	0.0003	A/T;57|AT;2|CA/TG;2|AC/GT;1|TA;1|AG/CT;1	A/T;0.8906|AT;0.0313|CA/TG;0.0313|AC/GT;0.0156|TA;0.0156|AG/CT;0.0156	ad161324-2adc-49fe-a3c3-e7f0568afe52/PCAWG.4fafcd08-19db-4e62-87e1-1c8f7ae7349a.bam	541ad8a1-5721-4f09-8ed0-880cfa4a454d/PCAWG.3d86775b-9149-41a5-91a2-4dbcc82eb3f6.bam	7586018	109	1e-05	8131	2122
063cfacf-9933-4a2d-8921-0aeb76e12779	KI	186518	125	0.0007	A/T;119|AC/GT;3|CA/TG;3	A/T;0.952|AC/GT;0.024|CA/TG;0.024	c969cf68-3c84-4933-bdbb-65a8055a1532/PCAWG.6a376f04-9d36-458f-a38b-83bb5643daa7.bam	cb318fda-bcbb-4f42-86b2-97320da00d5d/PCAWG.2342ca7f-0a28-4bca-9980-47680a885c01.bam	7411587	157	2e-05	5010	1208
51206157-94cc-4702-8247-c98283b487aa	KI	180555	10	0.0001	A/T;9|AC/GT;1	A/T;0.9|AC/GT;0.1	e1247be7-9f2b-4d23-9375-51f0432f19a1/PCAWG.d858067f-bfa5-4d74-8d9a-67f6aa0e9e40.bam	655bd91e-274f-43da-b192-0ce6d1bf7784/PCAWG.211364b8-eec2-40fe-8a27-b133e581085b.bam	7268677	73	1e-05	9299	1762
bcf54c96-2b62-4e24-926f-d77576250dd1	KI	158033	137	0.0009	A/T;125|AC/GT;5|AT;3|TA;2|CA/TG;2	A/T;0.9124|AC/GT;0.0365|AT;0.0219|TA;0.0146|CA/TG;0.0146	dd665f6e-ad16-41ea-b1d0-d3e07ea1f907/PCAWG.859ab907-0c65-427a-abdc-ec62d4a2043d.bam	f29bc2c2-133f-4027-93c5-b2f24dd2287a/PCAWG.34ff759b-e62e-45ec-8c27-3f0e531f77c8.bam	6594862	184	3e-05	4943	1189
dacd4cc2-fc2b-4fbd-adf6-c8a46ae69c91	KI	180227	94	0.0005	A/T;86|AC/GT;3|TA;2|C/G;2|GA/TC;1	A/T;0.9149|AC/GT;0.0319|TA;0.0213|C/G;0.0213|GA/TC;0.0106	4ead3998-5d30-4717-a209-498650bff4bb/PCAWG.886ebed1-d231-4cfe-96f0-673ba11f9f61.bam	92271b31-db60-472e-ae69-bdf0f768628f/PCAWG.77be39e3-d271-4089-ae1d-c6000c6ff38e.bam	7170858	150	2e-05	7610	1545
10d15b7a-16d1-4953-aaef-f193ffa97f42	KI	183441	68	0.0004	A/T;64|AC/GT;2|CA/TG;1|C/G;1	A/T;0.9412|AC/GT;0.0294|CA/TG;0.0147|C/G;0.0147	044b0ff8-680e-4aa1-97e3-94369fe5aff9/PCAWG.875731b3-1e9c-4c5e-98c0-45b69efc5f0b.bam	ff15f3a4-0dad-47dd-a9cc-47a3ee524ae1/PCAWG.77ec5481-d398-4ce5-87da-7b1c1c6735d1.bam	7371911	94	1e-05	8597	1899
64446aec-c125-4c81-b9cc-62482cb1aaed	KI	195476	18	0.0001	A/T;17|GATA/TATC;1	A/T;0.9444|GATA/TATC;0.0556	cf6c57a7-8964-4db6-824f-6333ce77b1f0/PCAWG.37f10089-d391-4788-bdb0-db8097858ace.bam	fa08bc79-a716-492c-a833-79e7b367a8d5/PCAWG.a559a3c7-c87d-4f7b-a285-694c681f18ba.bam	7545693	64	1e-05	7839	1912
0f53e757-1823-409f-a0ea-249270728e15	KI	194465	9	0	A/T;5|AC/GT;2|CA/TG;2	A/T;0.5556|AC/GT;0.2222|CA/TG;0.2222	bcc147d6-aa67-426f-9ad9-e849d1cb460f/PCAWG.0047e318-3928-4274-8faf-77b420044506.bam	458f38eb-875a-40be-8753-ba91772dfc06/PCAWG.d5979bdc-8a8a-48a5-8dc7-72d93b71c4ad.bam	7533443	47	1e-05	5096	1564
54842328-9432-4820-8976-7964bf9bf147	KI	194615	34	0.0002	A/T;30|AT;1|AC/GT;1|CA/TG;1|GA/TC;1	A/T;0.8824|AT;0.0294|AC/GT;0.0294|CA/TG;0.0294|GA/TC;0.0294	a7865bae-2305-42c3-8a5d-330f309d2712/PCAWG.6ebad441-fff3-4e7b-b2c8-3c51c06906e9.bam	c7797807-8191-499d-9f1f-8197aa8f3fe2/PCAWG.7461abae-0a22-4a0d-9d08-7ad95e0a04e7.bam	7511880	73	1e-05	7489	1648
267a9862-17bd-4056-ba4a-1f373736ffbb	KI	188312	12	0.0001	A/T;11|GA/TC;1	A/T;0.9167|GA/TC;0.0833	42bdb949-05a3-4e19-bd57-a2c5d997dfb8/PCAWG.70eb42fb-0c56-47d7-942a-8d949fadbd56.bam	2120a381-a0de-4819-8d51-c5db82d31863/PCAWG.5f531366-d06f-43bb-9211-ea9b1470ee5b.bam	7346122	55	1e-05	6918	2591
d991f23a-dc1b-427a-b798-bd4187d3aa02	KI	188368	102	0.0005	A/T;87|AC/GT;5|CA/TG;5|C/G;2|GA/TC;2|AT;1	A/T;0.8529|AC/GT;0.049|CA/TG;0.049|C/G;0.0196|GA/TC;0.0196|AT;0.0098	e46b7e11-cf23-4b0a-829a-cdd2d4996d7e/PCAWG.349643c8-361a-4082-a227-5632581ebffd.bam	da2de985-c87e-4f18-962e-7ba75669b3be/PCAWG.fb4371f6-148d-481d-9abc-84c00f825749.bam	7440365	190	3e-05	9842	2311
de4c3f91-d164-47df-9971-feba840d247c	KI	160530	8	0	A/T;3|AC/GT;2|CA/TG;2|TA;1	A/T;0.375|AC/GT;0.25|CA/TG;0.25|TA;0.125	5d7b93a0-c2cb-497e-9efc-5689eeb07f24/PCAWG.2edb680a-43a2-4431-8792-0d54457a32b6.bam	ad2d18b6-fe67-4291-a4b0-ea1f25f7a1d3/PCAWG.d1d777d0-49ca-4ee8-bbb4-8b575a0e032d.bam	6648093	23	0	6203	1813
fbf937f1-5f30-470c-8a77-46cd1c41e073	KI	178612	110	0.0006	A/T;98|AC/GT;4|CA/TG;4|AT;2|GA/TC;1|C/G;1	A/T;0.8909|AC/GT;0.0364|CA/TG;0.0364|AT;0.0182|GA/TC;0.0091|C/G;0.0091	94a0822a-48bb-495e-822d-ab705d32a1a7/PCAWG.6715a1dd-e2ed-4b94-b8e6-3afc5069ad26.bam	c9b41702-8811-4561-9a2a-bc09114dc5af/PCAWG.64b4514f-c553-4bdc-beb5-8e10ada3ad3a.bam	7148677	161	2e-05	8825	1394
d429c27a-5963-42fe-b3a0-7252c20669d8	KI	161463	8	0	A/T;6|C/G;2	A/T;0.75|C/G;0.25	3ddc1b92-983c-4f0c-b5d7-5ba4a4e7e192/PCAWG.85164d74-08d5-46d7-ade8-1c18df5b0116.bam	28e9b726-934c-4b30-8940-440afa6f130a/PCAWG.aef0dfc7-37f8-435a-acf7-3fc588f27c67.bam	6697007	46	1e-05	7783	1064
9c181313-5b4c-41c5-9ad5-a5a86fe609aa	KI	197129	105	0.0005	A/T;96|AC/GT;3|TA;2|CA/TG;2|GA/TC;2	A/T;0.9143|AC/GT;0.0286|TA;0.019|CA/TG;0.019|GA/TC;0.019	eed2a59d-3ed8-4bc3-a87a-9e16d798002e/PCAWG.cf91050f-f33b-46aa-a2a0-f79197efeb98.bam	e8c34b9c-bf76-4059-a85b-cb7a535643fb/PCAWG.7ca5fe5f-2d9e-4251-9cb3-a7d1b1b26ff9.bam	7619668	118	2e-05	4200	2232
00bf0350-8c7c-4b9e-8143-13ea2dc1122f	KI	187989	79	0.0004	A/T;71|AC/GT;5|CA/TG;2|C/G;1	A/T;0.8987|AC/GT;0.0633|CA/TG;0.0253|C/G;0.0127	f8eb2eda-0773-4a19-86a1-bade9f283087/PCAWG.c389781f-a2ab-4f87-91fd-1d8457beb89c.bam	b19454e3-fd58-4da1-a0af-e0cfea0e9157/PCAWG.78cefa65-901e-40ff-beb8-83001b91683b.bam	7433993	123	2e-05	6071	1328
db4592fb-13c2-4d61-9dc3-a5d43def8d4b	KI	191878	14	0.0001	A/T;11|AC/GT;1|AT;1|GA/TC;1	A/T;0.7857|AC/GT;0.0714|AT;0.0714|GA/TC;0.0714	0d7221ac-537e-4896-abf4-f978587f05e0/PCAWG.c0206c44-4560-4fc6-bda0-058bfc63a115.bam	4ee3e53d-bc55-4c79-b360-9cef57be88a5/PCAWG.f0fcaa4d-1ad3-4077-acc6-d2959ac735fd.bam	7475711	52	1e-05	6841	1571
a4f8305f-4409-4776-b34d-4878d18c8693	KI	144140	32	0.0002	A/T;24|AC/GT;5|CA/TG;2|C/G;1	A/T;0.75|AC/GT;0.1563|CA/TG;0.0625|C/G;0.0313	c23da353-a6ff-4627-9e90-aa7438dcd46e/PCAWG.d57c1302-1da0-4fa6-8968-394d19e6b1f1.bam	c809496f-dfd3-4e35-aaee-14c413522e70/PCAWG.1771bdd3-702b-41cc-946b-598c2bc32ec9.bam	6047863	67	1e-05	6672	955
d7f1db09-8ba0-4b76-bcd2-01c14165f0d5	KI	197441	46	0.0002	A/T;45|CA/TG;1	A/T;0.9783|CA/TG;0.0217	83b09cf3-6a9a-493c-ab90-b669b711ef86/PCAWG.e5b0f19b-cd81-43da-810f-2ec8780f1786.bam	92da094c-32c8-4115-a194-6b5231f43d32/PCAWG.c0b1f207-90d4-4e54-b3b0-a470313096b0.bam	7630690	73	1e-05	9454	1630
39c55051-e1bc-4081-962a-17205645de45	KI	195381	136	0.0007	A/T;125|AC/GT;6|CA/TG;4|GA/TC;1	A/T;0.9191|AC/GT;0.0441|CA/TG;0.0294|GA/TC;0.0074	fea44d5e-f184-4c0d-b239-fd3024100cdf/PCAWG.9b6cd038-dee8-47b3-bd30-9a361a1f39ae.bam	e2be4e01-62dc-4029-8fd8-b80db42ea1e2/PCAWG.de019d15-47ea-40b4-8055-885a16610d6e.bam	7599674	180	2e-05	5781	3974
2c581a74-7716-4c20-b366-a8e1d9a901f6	KI	197441	6	0	A/T;5|AC/GT;1	A/T;0.8333|AC/GT;0.1667	95c8df7c-2768-4f3d-9457-0b3cd4f58eeb/PCAWG.eaf41f88-c24a-4a34-961a-01b88c748d86.bam	d7a5cfd7-7206-438e-bcea-18fbbb43b2a8/PCAWG.484b753d-9c49-4f15-b9be-5aa61e064390.bam	7630132	24	0	8255	1575
f3c1a125-06e9-41c4-9558-275a3e346cc5	KI	197778	81	0.0004	A/T;76|CA/TG;2|AT;1|AC/GT;1|GA/TC;1	A/T;0.9383|CA/TG;0.0247|AT;0.0123|AC/GT;0.0123|GA/TC;0.0123	4433bed1-6222-462e-8508-926cd72c55bb/PCAWG.31daf4a9-8a05-4b7c-a35e-0ca2518a448f.bam	892b7770-ca43-4896-a8ab-3038339d6a9e/PCAWG.d58b1763-f9aa-4dcf-9aca-ac6f7bc3c928.bam	7633910	108	1e-05	5881	2046
fb194ca3-10aa-4dc5-8d08-619ddbd6d1b6	KI	171229	190	0.0011	A/T;179|AC/GT;5|CA/TG;4|TA;1|CATC/GATG;1	A/T;0.9421|AC/GT;0.0263|CA/TG;0.0211|TA;0.0053|CATC/GATG;0.0053	bdeecccc-f219-435c-90cf-b54c6992b55a/PCAWG.e1b57ff4-a056-42d1-9568-7035682c8369.bam	6d77aade-6f86-4b5d-b4d9-7ab63098c8f6/PCAWG.89fe67e5-8993-4d26-bb79-f7edcd4d512f.bam	7019364	233	3e-05	3809	1373
b51fa117-2c0a-4e1d-8ec4-9f039073a486	KI	169513	219	0.0013	A/T;209|CA/TG;5|AT;3|AC/GT;2	A/T;0.9543|CA/TG;0.0228|AT;0.0137|AC/GT;0.0091	43ea29ec-1d3c-456a-a110-76fb8857ec4c/PCAWG.47de774b-3a6a-4e16-9ef7-e2be04b2b231.bam	c96274f8-6afc-4393-be4d-26401a092ee7/PCAWG.8d082ed4-4804-497b-9833-ed922686808d.bam	6906626	289	4e-05	4662	1408
fa5e2900-95e7-4700-9707-a329cd0c77fd	KI	161134	90	0.0006	A/T;86|AC/GT;2|CA/TG;2	A/T;0.9556|AC/GT;0.0222|CA/TG;0.0222	2e9c306f-adf2-418e-98d8-6627ffb39865/PCAWG.58b5acca-b65f-4f28-8460-69f029681598.bam	b99bfcc5-0a60-4319-b89e-0803f3a4237b/PCAWG.092f9a5d-33ab-4c55-a1d8-4ecc87dcedf1.bam	6524527	128	2e-05	4411	1073
b6365bdb-e6d5-4615-95b3-db12a0c2f3d9	KI	190495	10	0.0001	A/T;9|GA/TC;1	A/T;0.9|GA/TC;0.1	6c1f96ca-cc3c-4fc1-aed4-484e6fb05160/PCAWG.cb827298-7792-4388-826d-c9e7b3fc5589.bam	05976fc0-1da8-4274-965e-bfcc8b651724/PCAWG.1712010d-3b10-49d0-afb8-91629f01894c.bam	7390863	55	1e-05	8362	1716
9fb40473-74cb-43cb-9a54-c990b8bbde17	KI	197567	58	0.0003	A/T;54|AC/GT;1|CA/TG;1|C/G;1|GA/TC;1	A/T;0.931|AC/GT;0.0172|CA/TG;0.0172|C/G;0.0172|GA/TC;0.0172	25f38c6d-a84f-4967-ab9e-66a5441bbd47/PCAWG.371a1b4b-79d5-4ab2-b251-9cf7b0b7b06b.bam	def50656-cc50-4041-8f01-0bb1f6aa8176/PCAWG.e71f2ee4-bfa4-4328-a904-7529f124b2b2.bam	7632388	77	1e-05	11005	1930
8fb7fcac-6c1d-40c2-9309-b53821cbef30	KI	171294	46	0.0003	A/T;43|C/G;2|AC/GT;1	A/T;0.9348|C/G;0.0435|AC/GT;0.0217	0d684d67-bb05-4481-93c6-6de8fcb22627/PCAWG.dc4cd4cf-f283-468c-a49a-b1ff1f3cc4b1.bam	10999bc2-abd8-415e-9a00-9e8f46b153d9/PCAWG.f17b8910-49c4-446d-be5e-83f506a74f2d.bam	6987345	130	2e-05	10152	1959
e1217ebe-1826-41a9-b6c4-702100a66f5e	KI	198047	11	0.0001	A/T;8|AC/GT;1|CA/TG;1|C/G;1	A/T;0.7273|AC/GT;0.0909|CA/TG;0.0909|C/G;0.0909	08bcb9ce-52ac-4cb4-b28e-672eda7809e8/PCAWG.34f3ebc8-dc52-4718-b78c-563217ea22be.bam	a85ebe3c-605c-46c5-9dba-f67bfc030d00/PCAWG.87c7f3ee-6c00-41b7-a2f0-91d97364405d.bam	7627160	26	0	3494	1005
ad9455e9-7147-489e-9b1f-3540c457c260	KI	196618	13	0.0001	A/T;11|AT;2	A/T;0.8462|AT;0.1538	8e0ef3b3-abc5-4298-8b3f-bae66ee3b4e2/PCAWG.d6123885-e61d-4bd2-8aad-a9228431c571.bam	f62a5ba2-e80f-4892-83c3-89e94bcf6742/PCAWG.4f6f5ddc-2a7d-4450-9f27-92e408183671.bam	7576755	37	0	9590	1617
2425a532-f562-423a-88f5-228642f53875	KI	176669	17	0.0001	A/T;12|CA/TG;2|AC/GT;1|TA;1|C/G;1	A/T;0.7059|CA/TG;0.1176|AC/GT;0.0588|TA;0.0588|C/G;0.0588	21332b43-6620-4926-8ba3-96b79a479e10/PCAWG.944d3325-ddbe-45c0-b70d-625bbeb1a794.bam	fc81fe12-8e0b-45b3-9f98-fe5f75fde453/PCAWG.5e438c69-00e0-4d09-bee1-1752be2231ae.bam	7001447	72	1e-05	7024	1970
19d6cf34-1cd7-4242-a4d1-5d3e11f428aa	KI	195846	38	0.0002	A/T;34|AC/GT;2|TA;1|CA/TG;1	A/T;0.8947|AC/GT;0.0526|TA;0.0263|CA/TG;0.0263	de29e319-e750-4ac7-9fed-9108546e68f0/PCAWG.495d4277-309e-4c56-89cc-d90b96ff13c8.bam	23a7e1a5-8456-4397-8955-35f947d15daf/PCAWG.9b887028-3f7a-458d-b13d-7ee334110adc.bam	7553869	117	2e-05	8822	2615
72293a70-9dc8-4e4a-acdc-c74587a90420	KI	195517	8	0	A/T;5|AC/GT;1|TA;1|CATC/GATG;1	A/T;0.625|AC/GT;0.125|TA;0.125|CATC/GATG;0.125	4f58e9bc-359a-46b3-a98c-a0c2ea34ea35/PCAWG.27f8d693-70d1-4c0a-8551-6271ac6acbdf.bam	aa1dbaba-a4e5-427d-b6e0-97b4a4e0edd4/PCAWG.4ec70d83-1170-4be6-a441-137fcff62e14.bam	7566117	14	0	2615	903
7815397b-aa39-4b79-bcaa-6859a3f115f8	KI	197623	5	0	CA/TG;2|AT;1|A/T;1|AG/CT;1	CA/TG;0.4|AT;0.2|A/T;0.2|AG/CT;0.2	ca4fa758-5766-40d4-a4e9-d1e00053479e/PCAWG.6f4718fa-0ad2-4373-8aac-ae12adf9c96f.bam	71d2564e-2035-469d-9372-b391ea9b0a92/PCAWG.8283c5e9-1aa1-463d-9e57-d50fde0dea81.bam	7618275	38	0	6693	1985
c14407ad-670e-4d1e-9417-2b76f4810fff	KI	197245	11	0.0001	A/T;9|AC/GT;1|TA;1	A/T;0.8182|AC/GT;0.0909|TA;0.0909	67aa6743-7963-432c-b1b1-2dc2496b12ab/PCAWG.b8522c88-6735-404d-b0f8-40f3c8d3c7fe.bam	91116215-9bfb-4e8a-9318-1bd6d96ed26f/PCAWG.87d1f78c-1242-4e79-9073-f89eef3eb6c5.bam	7598291	45	1e-05	6459	952
63d0c49d-918d-41fb-808a-1f8001981917	KI	195149	20	0.0001	A/T;14|CA/TG;4|AC/GT;2	A/T;0.7|CA/TG;0.2|AC/GT;0.1	c5b1019a-49f4-4217-a77e-ccf969f260a3/PCAWG.29e900b5-f4f6-481e-a152-ef25d1ff44e4.bam	be793879-2391-487f-b107-5b3d26aa38bc/PCAWG.409bac6e-db76-48a6-ad86-a625ca6beae6.bam	7563602	62	1e-05	4434	1008
dddea2e4-b8c3-4157-9d92-6de472e8375a	KI	198030	11	0.0001	A/T;9|TA;1|CA/TG;1	A/T;0.8182|TA;0.0909|CA/TG;0.0909	80ce56c2-8475-4290-99fa-18b1dbdeac2b/PCAWG.d5f70017-97ce-4fa2-83f8-5eb3a749556f.bam	5655517f-6fae-4440-a511-6760c637f9f7/PCAWG.dd2b7c9a-409c-45b5-8cb0-0327c5dcafdb.bam	7633099	52	1e-05	5950	997
e6801359-d1d7-4871-b2fb-180674a2e469	KI	196736	43	0.0002	A/T;38|C/G;3|AC/GT;1|CA/TG;1	A/T;0.8837|C/G;0.0698|AC/GT;0.0233|CA/TG;0.0233	b6bd8d88-2e87-4949-a165-8c74aa364b2f/PCAWG.797a3619-8d58-4fe5-96e6-306842901c70.bam	39032b5a-5f78-45cd-b21f-997ae8293bec/PCAWG.79d878cc-29f5-463a-935f-131a4ed4f766.bam	7591476	138	2e-05	9146	2681
f03330dd-c616-4ad5-abc3-6d6b0445e9e9	KI	191081	9	0	A/T;6|CA/TG;2|AC/GT;1	A/T;0.6667|CA/TG;0.2222|AC/GT;0.1111	1a107fd8-0122-425f-b2cc-cbbacf722297/PCAWG.bd122b67-1578-4f53-8bfa-3293b4fb4517.bam	3b4184e0-2bf1-4ba3-a457-4d523d64e48a/PCAWG.0b2c96c3-aa31-43b9-831c-0220ccbb2332.bam	7471980	60	1e-05	6310	1913
ca2b9fe2-97e0-4d4f-afd7-a5acf638800f	KI	173719	2	0	A/T;1|CA/TG;1	A/T;0.5|CA/TG;0.5	03e8e0b1-1e29-467c-af0a-b98a7cdf3381/PCAWG.88dbf91d-db76-49b3-8037-96cc9edf152b.bam	da3a31a1-b509-44ce-a05d-f9c29c538d7c/PCAWG.bdb8cbf8-a622-41cd-ace2-c7dfceb6ea0e.bam	7057551	9	0	3662	1026
6ba5f81a-b7a0-4c18-a112-2e11094eec85	KI	197595	8	0	A/T;7|CA/TG;1	A/T;0.875|CA/TG;0.125	9365e97e-b168-4fc3-8f00-dd279c707879/PCAWG.7db7c976-5424-4eb0-9c53-92206aaefb5d.bam	cc2e9d2c-5c69-4142-bdf0-f5cb250a1263/PCAWG.3b988ee7-3d31-4580-9f74-db43187d43b6.bam	7617741	44	1e-05	4732	1526
c504d5a9-29b0-4b7e-ac7b-5e543449a0f4	KI	196768	14	0.0001	A/T;10|AT;1|AC/GT;1|TA;1|CA/TG;1	A/T;0.7143|AT;0.0714|AC/GT;0.0714|TA;0.0714|CA/TG;0.0714	e44ce587-0609-487d-be28-f66493c30faf/PCAWG.c507e583-6da1-459c-82ee-e524a43cff34.bam	4afa0393-39a3-4964-bf69-7b54013583b4/PCAWG.bd5f029c-4e08-4c03-b082-5caaa7d1b664.bam	7587141	71	1e-05	8247	2751
483bb781-0179-42e1-bf9c-487b240769b8	KI	192883	14	0.0001	A/T;10|CA/TG;3|TA;1	A/T;0.7143|CA/TG;0.2143|TA;0.0714	eb93466e-768a-4ef4-962c-acbc85eacfeb/PCAWG.c695cbf5-a62e-4e93-8189-28a6394bd3de.bam	8c9265ea-ca7e-4f6b-8a94-3079bd742d93/PCAWG.113e3b01-b8d5-4255-bdfa-3bc40f6fc6f1.bam	7454561	49	1e-05	5378	2260
a9dbd55c-5dcc-48db-8785-6baef3fdd7db	KI	171742	21	0.0001	A/T;19|AG/CT;1|CA/TG;1	A/T;0.9048|AG/CT;0.0476|CA/TG;0.0476	2a082826-ac12-4cf5-9506-d0650ac0573b/PCAWG.1b3d2513-b7c8-49bd-85a2-401d039bcc78.bam	4b2456be-1dbe-46d0-81d6-ac8fc3b766d5/PCAWG.89d56f3d-30b1-40de-a789-33c92a8bfc16.bam	6768012	89	1e-05	6452	2038
5ecc88f7-8391-4168-af11-07a6bf9b3652	KI	187090	11	0.0001	A/T;8|AC/GT;1|GA/TC;1|C/G;1	A/T;0.7273|AC/GT;0.0909|GA/TC;0.0909|C/G;0.0909	6b677539-15c7-44a3-a6fd-d4a823668252/PCAWG.3a921418-7ca7-41af-aa40-8cc35d64156c.bam	4aaf156f-32e1-43eb-ae73-424c543c2c1b/PCAWG.af8674a0-521e-4f28-b13f-5559909e60c8.bam	7347855	97	1e-05	10094	2425
33b7e799-ad10-498f-9948-8ce433311539	KI	172967	11	0.0001	A/T;9|AC/GT;1|CA/TG;1	A/T;0.8182|AC/GT;0.0909|CA/TG;0.0909	43d5d3fe-c559-438f-94fe-34137120ce32/PCAWG.1a62410d-385d-4407-98cf-052ed03fb880.bam	9fc10514-094b-4517-b57e-cf18e1e5dfbc/PCAWG.f462e9f9-8026-4300-b337-4fa61b6aef28.bam	6808488	72	1e-05	8162	2554
642e1379-1061-40bc-9a4c-f7c191e84d9d	KI	192069	97	0.0005	A/T;91|CA/TG;2|C/G;2|TA;1|GA/TC;1	A/T;0.9381|CA/TG;0.0206|C/G;0.0206|TA;0.0103|GA/TC;0.0103	18c754bf-a542-4bed-acb1-5b0b9ab19b1c/PCAWG.f58d385e-5bbe-4fb3-ba6b-e62e979f4c5c.bam	c7372551-dd6f-41eb-acd1-f6f03f6806b2/PCAWG.b6e478c5-4b53-465f-96e3-cf518d5b6385.bam	7421635	183	2e-05	6354	1747
0ed63d84-d3fe-4289-9255-35f4a03b703b	KI	197614	7	0	A/T;4|CA/TG;2|C/G;1	A/T;0.5714|CA/TG;0.2857|C/G;0.1429	024a5d25-4059-425f-ba81-8cf9ffdeef14/PCAWG.c6b26d8c-2615-499e-ac08-dde01c13161a.bam	2d3d9bbb-69cf-4981-aa43-5bd88cd56016/PCAWG.baf57d47-3f1c-4600-a785-6d958e60766a.bam	7623509	48	1e-05	4994	1243
cf5deb22-f7eb-409d-a0e4-882716199c39	KI	198091	6	0	AC/GT;2|A/T;2|AT;1|CA/TG;1	AC/GT;0.3333|A/T;0.3333|AT;0.1667|CA/TG;0.1667	11936fba-c5cd-4886-aa01-eee06771fb61/PCAWG.a9149509-bd61-445d-96d2-cb5a5a59ea20.bam	319a4da8-6251-4894-8d32-d7521bd15202/PCAWG.70fd94f3-f63a-4372-811a-e7182f40c015.bam	7633609	39	1e-05	4734	1621
bef23192-57cd-4301-b7a7-5e82ca62482d	KI	187855	17	0.0001	A/T;14|AC/GT;3	A/T;0.8235|AC/GT;0.1765	92e2ae27-e0d4-47b5-aee8-8c13c8e86e6d/PCAWG.97e73968-6476-4f55-b803-bc7735194b22.bam	b94f82e9-5d66-4030-87b3-49f88fc2718c/PCAWG.45834f43-f8da-4289-ac3a-08ff808144b4.bam	7319241	53	1e-05	5429	2016
14dd86c1-dfb3-4124-a453-4d64223bc048	KI	198247	9	0	A/T;7|AC/GT;1|C/G;1	A/T;0.7778|AC/GT;0.1111|C/G;0.1111	8dee129b-d52c-4bd1-a5f8-30723c7488e8/PCAWG.b6639e54-0943-446c-9cf2-a501ea704f04.bam	d507a5e8-be71-4741-9afb-e7ea79b2a07b/PCAWG.b5bf0921-7fc5-4139-aace-7b653b4dddf6.bam	7635791	34	0	5357	1840
b4f515ce-5bee-4e40-a66a-01f41e92181e	KI	193840	68	0.0004	A/T;62|C/G;3|AT;1|AC/GT;1|GA/TC;1	A/T;0.9118|C/G;0.0441|AT;0.0147|AC/GT;0.0147|GA/TC;0.0147	c1c40e26-c8bc-4ab2-9c24-1b1cf5155177/PCAWG.37a74c04-fdc4-4a7f-a50d-02402b0ea27d.bam	a5fff1a8-4825-441d-81b6-441ed07550d4/PCAWG.1b935ef4-5c36-45c6-a64e-6fbe5e9141b5.bam	7488305	118	2e-05	5102	2055
88e35d25-d98d-4576-8ebe-1cd74010ecd8	KI	169714	35	0.0002	A/T;34|C/G;1	A/T;0.9714|C/G;0.0286	98478952-77e5-46ed-828c-346554e52181/PCAWG.f0bb5f25-210f-49e7-bb7a-2903591b037e.bam	ae4e8c35-b862-4c21-befb-44583ec81a65/PCAWG.266ed66b-9a33-42ed-9750-011f487345eb.bam	6956824	134	2e-05	13227	3222
40a609bb-2c8f-4146-83c4-e7b0d1b23619	KI	197845	19	0.0001	A/T;15|AC/GT;2|AT;1|CA/TG;1	A/T;0.7895|AC/GT;0.1053|AT;0.0526|CA/TG;0.0526	4fa75fc2-afd4-42c7-bddf-bd4d361bd905/PCAWG.b493fc4d-7bf2-4952-b15f-72678f2142db.bam	6f31e9ba-9694-4b86-8262-8e9e9c91029b/PCAWG.efbc5f42-2ef7-40fb-826b-8b2dfeb0f3d5.bam	7615491	96	1e-05	9630	2610
2deb8f9a-9e0a-46d1-bcb5-902db3b5c8ac	KI	197096	94	0.0005	A/T;90|AC/GT;1|AG/CT;1|C/G;1|GA/TC;1	A/T;0.9574|AC/GT;0.0106|AG/CT;0.0106|C/G;0.0106|GA/TC;0.0106	b7001a7f-e756-483c-88d5-f7a2a3988b4b/PCAWG.dc9dccc2-3327-4b2c-9f18-99e468bc196a.bam	dd661269-3048-4ac8-9201-bff26508c2b1/PCAWG.f85c89dd-fb71-42cb-8512-283c22f7fdd3.bam	7600393	181	2e-05	8020	2299
d8415cf6-8e4d-4c54-811e-199da14237f1	KI	198049	17	0.0001	A/T;11|C/G;3|AC/GT;1|AT;1|GA/TC;1	A/T;0.6471|C/G;0.1765|AC/GT;0.0588|AT;0.0588|GA/TC;0.0588	23323204-5545-424d-ac5c-c1608eaadf54/PCAWG.aba5d6d8-eb04-451e-9dd9-782f52f1c317.bam	2c47fe8e-a203-43f9-a982-0ab5426b04ab/PCAWG.f68ceda0-e068-46b3-a07b-2fa064a9709d.bam	7632337	83	1e-05	6870	2006
a441697c-4ca0-4eab-9b01-b9cb50223ce2	KI	154039	9	0.0001	A/T;9	A/T;1	0b1500b3-caa0-4fb8-8a5f-0f5947688ead/PCAWG.a3dc8046-0bfb-4651-9bba-d1ee543760f5.bam	636357dc-778f-4bfe-baed-f872e81fa7e3/PCAWG.bfb1f8cc-39fa-49c5-a71f-323ac3a2a00e.bam	6163458	64	1e-05	6465	2009
2e8ad1cd-d5d5-4bb4-8bbd-e9bef45088da	KI	197601	8	0	A/T;8	A/T;1	c2a49a56-8e3b-4bba-87f3-bb891b4e4e33/PCAWG.4a59f065-1027-477a-8d8a-90fd38318be6.bam	551f0b3c-18a7-4945-8a04-692edd41b7ee/PCAWG.cfcf1320-5fb0-4c58-8852-f70c763a630c.bam	7623573	83	1e-05	8961	2571
b19ec4cd-2876-4a2b-bcb9-b3c8db54fc15	KI	197198	21	0.0001	A/T;17|CA/TG;2|AC/GT;1|C/G;1	A/T;0.8095|CA/TG;0.0952|AC/GT;0.0476|C/G;0.0476	c6faab67-df49-4048-8246-6580a15b11cc/PCAWG.9bd76106-b42f-42f9-987f-418b1d0a5f21.bam	fbd5df22-5e00-42bf-954d-c3f3bcf0fd10/PCAWG.c4e5003b-069b-4f19-afa7-1d9161c2564a.bam	7620774	91	1e-05	8970	2414
bd2cc59d-f5ce-46ed-beb0-4c80b24cbe71	KI	171059	6	0	A/T;2|CA/TG;2|CATC/GATG;1|GA/TC;1	A/T;0.3333|CA/TG;0.3333|CATC/GATG;0.1667|GA/TC;0.1667	ef6d4336-a104-4d5d-80af-88ec99adbe3a/PCAWG.3a87c1c6-c85e-41de-8871-01906570498a.bam	549598f4-5719-4983-a6a7-8bae7b527e1e/PCAWG.ea49194e-a9b4-4c8a-93fb-2ce2debc3d19.bam	6988880	13	0	2741	892
SNU_WGS_01_S1	MY	191435	37	0.0002	A/T;28|TA;3|AC/GT;2|CA/TG;2|AT;1|AG/CT;1	A/T;0.7568|TA;0.0811|AC/GT;0.0541|CA/TG;0.0541|AT;0.027|AG/CT;0.027	1621ac02-26c0-462c-a753-f4dc043a65c8/612403ab750586fecf43cf609ff4273f.bam	bd662226-de49-49b1-9878-7c387613bebb/24c91b6bab31c9b28cb078394d05b0dd.bam	7468368	61	1e-05	2804	632
SNU_WGS_02_S1	MY	165439	29	0.0002	A/T;26|CA/TG;2|AC/GT;1	A/T;0.8966|CA/TG;0.069|AC/GT;0.0345	8242460f-8b01-4635-b1bb-49bdb6ef580d/f853b0f0c5eec85cf972b19863b57aa6.bam	831bc893-7442-494a-859e-fa9d2c6818aa/d7385a2b08a91a2ed1e0667c25bdc0bd.bam	6740353	38	1e-05	2537	911
SNU_WGS_04_S1	MY	164059	9	0.0001	A/T;7|AC/GT;1|CA/TG;1	A/T;0.7778|AC/GT;0.1111|CA/TG;0.1111	f344432f-711f-4eed-a4d8-b1c14e57fa9b/089dc7f45bc05d2206ca2fad65cb82a8.bam	0a263721-60bd-4d77-b250-35d2bcccf61a/6ffb74f8c7782e67df42abd29db9eda0.bam	6826688	9	0	2845	750
SNU_WGS_05_S1	MY	166119	17	0.0001	A/T;13|CA/TG;3|AT;1	A/T;0.7647|CA/TG;0.1765|AT;0.0588	1ac60593-3809-434c-96b6-a1b9d94b4ff4/1e89d0a9f1f856ac4e783e29ecaeff59.bam	a38bc296-b789-4039-8275-c5ba800f7740/f34f0c2c9642b2eac55db4990a2a2fa6.bam	6742822	32	0	2259	783
SNU_WGS_06_S1	MY	177381	19	0.0001	A/T;13|AT;2|AC/GT;1|TA;1|CA/TG;1|GA/TC;1	A/T;0.6842|AT;0.1053|AC/GT;0.0526|TA;0.0526|CA/TG;0.0526|GA/TC;0.0526	63c53f6e-198e-4dca-b730-7d91918e78f5/31a8df1f63429f863997ff32a9db899a.bam	04c318b7-33dd-4046-8faa-a36fc0a111c7/654f8872454e4f051ce20e87604ea0ae.bam	7196341	27	0	2018	692
SNU_WGS_09_S1	MY	164782	17	0.0001	A/T;13|AT;3|CA/TG;1	A/T;0.7647|AT;0.1765|CA/TG;0.0588	285555ee-4bd3-4cef-b289-1ca42998829b/4fa9f8ebe0ef986e4ab2a4b9d23c64ea.bam	7da133c8-54a5-4fd2-a100-7c9fa665e88c/b8db7942767581c224864486c65e71eb.bam	6803584	26	0	1835	732
SNU_WGS_10_S1	MY	147344	15	0.0001	A/T;11|CA/TG;3|AC/GT;1	A/T;0.7333|CA/TG;0.2|AC/GT;0.0667	8be50eaf-474d-4564-82fb-e3ec9879b1dd/61ecb75f255cdae835fd70788bfb568e.bam	098f62a7-5d87-4c8f-9a69-2732723503a5/ebbe35422c60d70bdda421c5bd09920d.bam	6269322	23	0	2112	699
SNU_WGS_11_S1	MY	180118	12	0.0001	A/T;8|CA/TG;2|AC/GT;1|AT;1	A/T;0.6667|CA/TG;0.1667|AC/GT;0.0833|AT;0.0833	98aedacf-ece4-4df1-8b18-4341920a5887/1f906d555f354647ff6bb5c0330a03ad.bam	84ccd876-4860-4c42-bbd2-b955655268ec/fbe836a2d0cb6c27fe85ec0b2218a219.bam	7237382	16	0	1065	425
SNU_WGS_12_S1	MY	179935	29	0.0002	A/T;21|CA/TG;3|AT;2|AC/GT;2|C/G;1	A/T;0.7241|CA/TG;0.1034|AT;0.069|AC/GT;0.069|C/G;0.0345	eed040e3-53cb-4553-8957-b349c5938790/70fb3bdfdae7eb33278ef62660ca680e.bam	209db60c-f2fd-4d24-bcb3-22e32de90dc5/f1791b5dd73bc0eefcde7f80d530b877.bam	7248463	39	1e-05	4228	1023
8bcc8c06-8c33-4409-8a0c-87723323dcce	MY	150160	24	0.0002	A/T;18|AC/GT;3|CA/TG;2|AT;1	A/T;0.75|AC/GT;0.125|CA/TG;0.0833|AT;0.0417	fcc373a3-3b60-4429-b74f-224686d679ce/PCAWG.b0511bcd-f3d6-4557-bdb5-6c7439b7784b.bam	ae1fd34f-6a0f-43db-8edb-c329ccf3ebae/PCAWG.47071d63-9223-4faf-9a50-3af9c6c9492e.bam	6818305	32	0	5232	470
c18e3a6e-fcb3-40fc-9d04-02cca3517a2e	MY	142759	14	0.0001	A/T;10|AT;2|AC/GT;1|AG/CT;1	A/T;0.7143|AT;0.1429|AC/GT;0.0714|AG/CT;0.0714	ee90acfb-86cb-4e20-950d-edd254b8daad/PCAWG.2eaf382d-241d-43c1-b87e-d5322ec7c621.bam	99f89b00-ad5a-4ea8-aace-363ae056ac3b/PCAWG.47819794-d58a-4ddc-a8ed-0ce70df43a91.bam	6351456	21	0	2606	426
5f3d1f46-26bd-4f17-a748-dba49de28019	MY	160639	38	0.0002	A/T;31|CA/TG;4|AC/GT;1|AT;1|C/G;1	A/T;0.8158|CA/TG;0.1053|AC/GT;0.0263|AT;0.0263|C/G;0.0263	cdba59bd-8efb-4724-aa2e-d63ecb6af6d0/PCAWG.1f82b5e2-32c3-4177-85c5-cc27ef8640aa.bam	b98bf146-015d-4e41-a23d-e596e2dc7140/PCAWG.f973c499-80d7-4a20-ba35-b0029d371080.bam	6506410	45	1e-05	2831	874
448eb0b1-916c-4a71-a0af-926c3935405b	MY	184819	18	0.0001	A/T;10|CA/TG;6|AC/GT;1|TA;1	A/T;0.5556|CA/TG;0.3333|AC/GT;0.0556|TA;0.0556	b5f0164a-3476-48f6-9297-7f5e8d154a3f/PCAWG.3b15050e-9cf8-4999-b8f5-4df6fcb8da8d.bam	d9502b49-3c26-41b5-a71f-54d773546371/PCAWG.789bc74d-1af0-4a8f-aa7f-04a7d0b634ae.bam	7304250	23	0	1292	804
0d5a3e47-4cfd-43b3-b593-e895a5df70f4	MY	165331	31	0.0002	A/T;28|AC/GT;2|TA;1	A/T;0.9032|AC/GT;0.0645|TA;0.0323	47bad5ee-444f-4373-8e4e-0c6c318a742e/PCAWG.a76d0d4e-eaac-4543-bcfb-c5c9958885f4.bam	cfffba2f-e7be-4c45-a3b1-f0e43451d9d9/PCAWG.c2802a0e-2750-44a6-92c8-f977b9224d07.bam	6695795	37	1e-05	3221	751
5c50334e-218d-4bf2-adcb-53dcebf30b57	MY	175663	20	0.0001	A/T;15|AT;1|AC/GT;1|TA;1|CA/TG;1|C/G;1	A/T;0.75|AT;0.05|AC/GT;0.05|TA;0.05|CA/TG;0.05|C/G;0.05	a71183fc-11ea-47e3-a5b0-44db5187048c/PCAWG.7396d60b-41db-4b1d-aa15-ef68ac4853c9.bam	30c2009a-7bc6-4a66-a7c4-8ccb70b6d2ea/PCAWG.ff78a88a-08ec-4f9f-885b-c080d2ebbc12.bam	6873044	25	0	4992	707
88e6d314-8576-444a-af19-811f8fa44c90	MY	148797	13	0.0001	A/T;11|TA;1|CA/TG;1	A/T;0.8462|TA;0.0769|CA/TG;0.0769	04d64bb5-bf1c-4f34-bcfb-a5a2459e5f5c/PCAWG.ce013106-866c-4594-96b2-9265bdcbfaef.bam	6535319d-c855-42c9-a7bc-04265986f8c1/PCAWG.c661c1d3-da36-4034-8c2b-2c2b4dcf0116.bam	6281870	20	0	3548	440
04356a1d-2615-4729-8aab-c35440f498bb	MY	145831	14	0.0001	A/T;11|AC/GT;1|CA/TG;1|C/G;1	A/T;0.7857|AC/GT;0.0714|CA/TG;0.0714|C/G;0.0714	5147a1bd-0e45-44a0-b950-6aede100dec6/PCAWG.68da57dc-789e-47b4-b86f-3ddc2380c6ce.bam	91a7b724-cc10-4b20-8a34-cb8ebb11c34d/PCAWG.9e66e4a8-ead0-4a70-bc25-da73b2835acc.bam	6809847	21	0	5142	435
46b127f4-a3de-486c-8b90-d300ee13b182	MY	134109	12	0.0001	A/T;10|AT;1|CA/TG;1	A/T;0.8333|AT;0.0833|CA/TG;0.0833	1388ba18-793c-472c-8c80-b268486fbe1e/PCAWG.308e0566-5f7b-440b-a933-b3841805cfd8.bam	1a1dd05f-a395-4a28-bc7a-7baa9c57f0f9/PCAWG.214afff4-94a4-4d5b-8694-fb9999d4bbb3.bam	6203841	15	0	1308	383
7a27cf8c-6993-4e70-88eb-867073453891	MY	170318	22	0.0001	A/T;18|CA/TG;3|TA;1	A/T;0.8182|CA/TG;0.1364|TA;0.0455	7d047172-9eb2-4128-aaa3-edcf412d3981/PCAWG.18cad95d-6d20-4e6e-a8aa-720f15f085b0.bam	db8791d0-1df0-4047-be05-3a2ad0b9034b/PCAWG.6293f76b-ac44-4ecf-8bc0-b29ca8f76a10.bam	7188681	32	0	4751	1121
b2a7cdc3-4574-4d50-9dfb-a8a58db9b2d2	MY	148997	13	0.0001	A/T;9|AC/GT;2|TA;1|CA/TG;1	A/T;0.6923|AC/GT;0.1538|TA;0.0769|CA/TG;0.0769	02ae70e8-fab4-4714-9e4e-64d9b263939f/PCAWG.ab8607cd-7edb-41b5-9549-185ad028c14b.bam	3fb3a237-ee68-4fc3-b72b-25c3c9b47924/PCAWG.377fb5a6-cf0a-464e-b81b-659c015e8c39.bam	6807074	18	0	3783	465
8c7bac04-9796-4fbf-9340-41e5a993ef09	MY	163711	31	0.0002	A/T;25|CA/TG;2|AC/GT;1|AT;1|TA;1|C/G;1	A/T;0.8065|CA/TG;0.0645|AC/GT;0.0323|AT;0.0323|TA;0.0323|C/G;0.0323	cde7834a-d3ef-49fd-8fc8-7e155d39ee38/PCAWG.a7ccad4a-b56a-4934-992b-f3d253936576.bam	a79e6d9a-5591-4d62-9455-220cf703d95c/PCAWG.3ba84a74-acb3-44f0-ad92-aefb69eaadd8.bam	6701047	37	1e-05	2686	774
0ed17783-f51e-43d5-8852-5e2ec3e97620	MY	131865	13	0.0001	A/T;12|CA/TG;1	A/T;0.9231|CA/TG;0.0769	56961d79-a897-4922-850e-5119276956b2/PCAWG.40af7939-78fd-471f-83a6-467ff083df85.bam	2b45836d-cde0-4962-9574-8f0a89705773/PCAWG.018b9fb8-9ce8-4b65-a61c-fc22011184a7.bam	6049400	15	0	1916	411
cab2ed1c-b8a3-471c-92b6-0fe54753926c	MY	146035	19	0.0001	A/T;18|CA/TG;1	A/T;0.9474|CA/TG;0.0526	79304900-9b08-4224-b45b-c6eed6304d74/PCAWG.f21a6148-54e4-4176-91ff-bde958b99a79.bam	630825d9-9dff-4ebc-a4b5-f6fed8ed23a2/PCAWG.8e7d62cb-0571-473a-b28b-70641eae2317.bam	6417077	24	0	1955	648
7b5c8c1f-0f5d-4795-b2ff-087b5f9ba7e9	MY	155808	15	0.0001	A/T;12|AT;1|CA/TG;1|GA/TC;1	A/T;0.8|AT;0.0667|CA/TG;0.0667|GA/TC;0.0667	317fc08a-4fed-45fb-a698-f2b92ae1a47c/PCAWG.e8694230-7141-4ca1-af48-282f41601bd6.bam	748a30c6-9439-4eb5-bc76-18161f18caa1/PCAWG.969e0a24-8858-435e-b724-829f14a63850.bam	6730878	20	0	1588	442
bd80821b-408f-43b2-961d-f09bbb12d7f6	MY	141864	43	0.0003	A/T;35|CA/TG;3|AT;2|TA;2|AC/GT;1	A/T;0.814|CA/TG;0.0698|AT;0.0465|TA;0.0465|AC/GT;0.0233	17d10e20-f1d1-4f04-8817-52d86964569a/PCAWG.8117c572-79e1-43f7-b47d-171d8db54fe7.bam	1094fd8d-3184-4a8b-af6e-eab3c80e939b/PCAWG.ff2836e1-9a29-463f-9b33-7e291e891611.bam	6133813	72	1e-05	2951	787
fc2d6c31-dadb-45cb-9053-c87f535a77a5	MY	188193	19	0.0001	A/T;9|CA/TG;5|AC/GT;3|AG/CT;2	A/T;0.4737|CA/TG;0.2632|AC/GT;0.1579|AG/CT;0.1053	e4b1335d-88bb-43b1-ac97-2287d8785cf7/PCAWG.56935762-6bf3-4d47-8951-e124ba03be88.bam	c5a4a0e5-5b79-4294-9ebf-6341946e693c/PCAWG.c1ac56d5-196e-4d98-ab32-93e8187f19d2.bam	7154943	23	0	2884	1594
c3446bd7-5059-4d80-a799-543c1d343234	MY	144729	25	0.0002	A/T;20|CA/TG;2|AT;1|AC/GT;1|GA/TC;1	A/T;0.8|CA/TG;0.08|AT;0.04|AC/GT;0.04|GA/TC;0.04	1e0d4a66-77ad-4c55-8810-6296a50a4e3f/PCAWG.f713a0d5-10fe-4b30-be8a-28b0377bd2a2.bam	35a2db21-87b8-4c1d-bd50-076c649a645f/PCAWG.0d07625e-4e2b-46f8-93d1-f4bf6527987f.bam	6476215	33	1e-05	2358	416
fa40b7ea-63b5-45a7-a434-0d4f50b58d49	MY	148343	19	0.0001	A/T;11|CA/TG;4|AC/GT;2|AT;1|C/G;1	A/T;0.5789|CA/TG;0.2105|AC/GT;0.1053|AT;0.0526|C/G;0.0526	e8162854-17a3-43da-ad62-1189c9d0ac77/PCAWG.181f8b76-5128-4947-b225-3f662f546f8e.bam	d3d82a6d-4b05-458e-afa2-8f1154e6a114/PCAWG.1dfa8f01-1fe0-4e13-bb9a-172a0bd7e28f.bam	6520285	25	0	3344	629
6847e993-1414-4e6f-a2af-39ebe218dd7c	CN	168266	76	0.0005	A/T;63|CA/TG;5|AG/CT;4|AC/GT;3|GA/TC;1	A/T;0.8289|CA/TG;0.0658|AG/CT;0.0526|AC/GT;0.0395|GA/TC;0.0132	b63be7c7-420c-40a5-b823-efaa75976973/PCAWG.f466f409-012f-4833-957b-8de7d21ae60f.bam	eb899322-b112-49ef-802a-69118308810d/PCAWG.c4acd2ab-93da-47ff-a5ac-14a9c269bc06.bam	7127735	88	1e-05	877	724
85d915b8-0184-4ec7-93ad-e9ffa2f5743b	CN	158879	95	0.0006	A/T;72|CA/TG;6|AC/GT;5|AG/CT;5|GA/TC;4|AT;1|TA;1|C/G;1	A/T;0.7579|CA/TG;0.0632|AC/GT;0.0526|AG/CT;0.0526|GA/TC;0.0421|AT;0.0105|TA;0.0105|C/G;0.0105	f7671f8d-ec7d-4192-a0a5-3c7925566706/PCAWG.91e95a62-a8a2-4319-8162-f892ed5c80e8.bam	82caa146-f154-4cc1-973d-04001ba94323/PCAWG.779c1e2d-d4c1-4806-bd88-4ce0106e5d40.bam	6818344	137	2e-05	5013	1377
8c46a1df-1c10-4188-992a-a55b782494c9	CN	177493	65	0.0004	A/T;45|CA/TG;9|AC/GT;8|GA/TC;2|AG/CT;1	A/T;0.6923|CA/TG;0.1385|AC/GT;0.1231|GA/TC;0.0308|AG/CT;0.0154	76dcd576-defc-4de1-a0eb-8e8751469374/PCAWG.1abc0f5f-e476-4585-a13a-c5ca09f1bf3b.bam	5a117894-acb7-4fff-901c-8f168034ae1f/PCAWG.94935f6d-7c10-40cf-b017-13f973ef12cb.bam	7295237	94	1e-05	3382	1186
c1abb741-4fcd-4161-b057-c7efd619cc99	CN	174455	80	0.0005	A/T;61|CA/TG;6|AC/GT;4|AT;3|TA;2|C/G;2|AG/CT;1|GA/TC;1	A/T;0.7625|CA/TG;0.075|AC/GT;0.05|AT;0.0375|TA;0.025|C/G;0.025|AG/CT;0.0125|GA/TC;0.0125	6400a862-3291-4d8d-add8-116c86f48171/PCAWG.bbed3f54-7400-4920-8584-94ce2f123586.bam	e6dba536-6fc1-4b9f-86a9-e0ae6d946780/PCAWG.51bd82dd-309f-489d-b8fd-a85701de3736.bam	7233840	110	2e-05	3020	1161
86386b36-2950-4479-b79f-4b347053c8bc	CN	170981	66	0.0004	A/T;47|AC/GT;6|CA/TG;6|TA;2|AG/CT;2|AT;1|ACACA/TGTGT;1|GA/TC;1	A/T;0.7121|AC/GT;0.0909|CA/TG;0.0909|TA;0.0303|AG/CT;0.0303|AT;0.0152|ACACA/TGTGT;0.0152|GA/TC;0.0152	ae31fd70-b968-4480-85ff-0df13a8287be/PCAWG.d7ce1036-fd19-40c3-9c17-b6c946e2b739.bam	07449134-633b-419e-abf5-1054c3204f69/PCAWG.c6433fce-cd74-4b12-a4ff-65633b881596.bam	7191905	85	1e-05	2089	790
67f88cd9-ab77-4227-a8d7-5512246f9772	CN	198203	27	0.0001	A/T;18|TA;2|AG/CT;2|CA/TG;2|AC/GT;1|GA/TC;1|C/G;1	A/T;0.6667|TA;0.0741|AG/CT;0.0741|CA/TG;0.0741|AC/GT;0.037|GA/TC;0.037|C/G;0.037	d473f063-3b4a-412b-ab73-371ec45b34fb/PCAWG.1fae200e-043b-46c4-a4ca-87324c056732.bam	1ed4fd59-5b77-44ba-b71e-740581ca307f/PCAWG.542afa3c-0a47-42ae-a47c-cc09db098043.bam	7645244	35	0	2311	686
c6888be2-4517-41e4-a801-9c915f24e737	CN	173990	98	0.0006	A/T;86|AC/GT;5|GA/TC;3|CA/TG;2|AT;1|C/G;1	A/T;0.8776|AC/GT;0.051|GA/TC;0.0306|CA/TG;0.0204|AT;0.0102|C/G;0.0102	3d6f28dd-eeb9-40a6-bf8d-cf71f35f984e/PCAWG.dcf13091-0daf-4c30-a796-617caf780ff8.bam	d8a34608-b9ca-4e7f-8811-d8fee192c6ea/PCAWG.2765b1db-598c-4dc8-a188-3134dd9a281b.bam	7174318	142	2e-05	4058	1267
2aeaab9f-4459-4be8-91e7-e0746cbd671c	CN	193997	24	0.0001	A/T;12|AC/GT;3|AG/CT;3|GA/TC;3|CA/TG;2|TA;1	A/T;0.5|AC/GT;0.125|AG/CT;0.125|GA/TC;0.125|CA/TG;0.0833|TA;0.0417	bd930455-cf52-4b07-8404-0f65bfcea93a/PCAWG.e6859e4c-ea71-4617-b36f-43f06f59293e.bam	1fe0b0a1-e8dd-49d5-8cdb-a53c2b460409/PCAWG.df783e3e-7e62-4c24-b76a-7bff3e34f964.bam	7575847	33	0	4441	1339
f92a34fa-014e-4b41-a6d0-3b46b8c8a3ee	CN	154755	110	0.0007	A/T;86|CA/TG;10|AC/GT;8|AG/CT;4|C/G;2	A/T;0.7818|CA/TG;0.0909|AC/GT;0.0727|AG/CT;0.0364|C/G;0.0182	d123eb04-b079-45c4-a59c-b36d7c309bbe/PCAWG.92e02379-9489-44e6-8f86-1f437781bab3.bam	67d19918-295a-434e-8370-99faafb18a4f/PCAWG.ec210713-343a-45d9-adef-78df46f1aa02.bam	6738453	141	2e-05	2770	1091
88395c0e-4afe-434d-8b20-5a3eef8b7f00	CN	189699	36	0.0002	A/T;23|AG/CT;6|TA;2|AC/GT;1|AT;1|CA/TG;1|C/G;1|GA/TC;1	A/T;0.6389|AG/CT;0.1667|TA;0.0556|AC/GT;0.0278|AT;0.0278|CA/TG;0.0278|C/G;0.0278|GA/TC;0.0278	979e0038-c43d-4ae0-8e37-feec2245929a/PCAWG.290988c9-3327-4e50-bda0-868fb444f87d.bam	d6b5e5e2-e1dc-4d54-ade4-cdd8cf161240/PCAWG.5237918f-2360-48e7-93c0-23de43369270.bam	7518919	40	1e-05	2656	1619
d252a54e-0377-4b3e-8228-26108ea704fa	CN	161105	85	0.0005	A/T;73|CA/TG;3|AT;2|AC/GT;2|GA/TC;2|TA;1|AG/CT;1|C/G;1	A/T;0.8588|CA/TG;0.0353|AT;0.0235|AC/GT;0.0235|GA/TC;0.0235|TA;0.0118|AG/CT;0.0118|C/G;0.0118	8108d4cf-d2e0-4255-b24a-fda2c2f311b6/PCAWG.9eea842b-353b-42c0-b942-0b2ed79cd1ee.bam	1d191c8f-c5df-43e8-9989-ee206f816c54/PCAWG.e0281249-419e-477b-b1e4-aa7d3be8a656.bam	6890344	125	2e-05	2790	1344
ba94c29b-b76e-4d67-bf5a-ce6bc45d85f8	CN	143717	103	0.0007	A/T;98|CA/TG;3|AT;1|C/G;1	A/T;0.9515|CA/TG;0.0291|AT;0.0097|C/G;0.0097	3e3db9a7-cc4a-4122-b96a-3004049fe514/PCAWG.d787e72c-c0f7-4a1e-a12d-87683d155206.bam	2130b781-b510-479f-974e-850155f9f109/PCAWG.624eead9-ec42-4b16-ac5a-bad326184d40.bam	6501443	155	2e-05	3897	1324
3a81f733-b3a3-4578-b925-a663612bc92c	CN	195172	39	0.0002	A/T;23|AG/CT;5|AC/GT;4|CA/TG;2|GA/TC;2|ACAG/CTGT;1|AT;1|AAAAC/GTTTT;1	A/T;0.5897|AG/CT;0.1282|AC/GT;0.1026|CA/TG;0.0513|GA/TC;0.0513|ACAG/CTGT;0.0256|AT;0.0256|AAAAC/GTTTT;0.0256	41a77b53-004f-4f71-8ef6-615886136ee3/PCAWG.ea887acf-adf0-4359-9274-3d50a36ccd4c.bam	dc4290e9-aa9b-4e54-8272-fa15881c45c8/PCAWG.07a6281c-4f1c-4121-938b-c93f436408de.bam	7603986	44	1e-05	3399	1334
d414e076-dcb6-4edf-adef-0abdc57354ea	CN	174627	67	0.0004	A/T;57|AC/GT;3|AT;2|GA/TC;2|C/G;2|CA/TG;1	A/T;0.8507|AC/GT;0.0448|AT;0.0299|GA/TC;0.0299|C/G;0.0299|CA/TG;0.0149	83a83309-7848-46d0-b1e3-e4a55b4585e2/PCAWG.4141525c-4196-43ca-86dd-1acad4b39df8.bam	0b31ee42-9647-4729-bc0a-bc0f447c9848/PCAWG.8a0b525b-ca5e-454b-9fa9-30088c29a103.bam	7158798	97	1e-05	3630	1068
a78544d7-65c6-4778-af62-ceec24c14056	CN	194387	60	0.0003	A/T;50|AG/CT;5|C/G;3|AC/GT;1|TA;1	A/T;0.8333|AG/CT;0.0833|C/G;0.05|AC/GT;0.0167|TA;0.0167	b08cc0c4-e8ac-46a2-9fd9-bca14862fd6e/PCAWG.ca954152-62cc-428f-854d-436b7d29b901.bam	319556b5-a666-4a45-8150-aa33b5cb93df/PCAWG.64b83db8-23f5-47bf-87eb-db43a296da9c.bam	7584294	99	1e-05	7945	1996
218a9531-9264-43bc-8535-858d4cb0919e	CN	185476	26	0.0001	A/T;17|GA/TC;3|AC/GT;2|AG/CT;2|CA/TG;2	A/T;0.6538|GA/TC;0.1154|AC/GT;0.0769|AG/CT;0.0769|CA/TG;0.0769	49706688-4b8f-44fb-8b02-e4dbf8d02121/PCAWG.1e194c8e-9491-4e8c-b2f1-bdb1f003ba96.bam	dfe7a728-6c39-40fd-9f36-0c9f1125d329/PCAWG.7d31660a-6f3c-441e-9dd4-7d8b688588f8.bam	7445648	27	0	1054	1343
3d477ac1-3bdf-4410-9594-1a3a1412c6ae	CN	159067	114	0.0007	A/T;101|AC/GT;6|CA/TG;3|TA;1|AG/CT;1|C/G;1|GA/TC;1	A/T;0.886|AC/GT;0.0526|CA/TG;0.0263|TA;0.0088|AG/CT;0.0088|C/G;0.0088|GA/TC;0.0088	0fa7da82-053e-4b80-8544-133b143f8022/PCAWG.59378079-3dbd-41f7-b1cb-5b2e5629dab3.bam	0aacb519-7a0f-4a68-87a7-c3509972260c/PCAWG.7b876c3a-ba1b-4f5f-9cfb-2e9bc63d973b.bam	6809557	161	2e-05	6940	1185
00493087-9d9d-40ca-86d5-936f1b951c93	CN	169717	81	0.0005	A/T;55|AC/GT;9|CA/TG;8|TA;4|C/G;2|AT;1|AG/CT;1|GA/TC;1	A/T;0.679|AC/GT;0.1111|CA/TG;0.0988|TA;0.0494|C/G;0.0247|AT;0.0123|AG/CT;0.0123|GA/TC;0.0123	ede167cd-9f79-43ff-8985-b6bd56096f28/PCAWG.93af3f23-4a1a-47a0-af3e-4a288822f731.bam	2683bc30-6748-4d27-a6f8-59b5b63142fb/PCAWG.ec277668-487e-44f7-a874-da32b59eb6ed.bam	7050891	121	2e-05	3222	1036
CHC197T	LI	188043	57	0.0003	A/T;48|C/G;3|AT;2|TA;2|AC/GT;1|AG/CT;1	A/T;0.8421|C/G;0.0526|AT;0.0351|TA;0.0351|AC/GT;0.0175|AG/CT;0.0175	737c2926-830a-486c-a16c-dcf2159bea0d/4c1000562028a4f31e581196b188ed14.bam	ebf8e985-d095-4941-a977-792035a2194d/20c0ae23596db7d30a8d25dcd69bb760.bam	7431175	121	2e-05	13872	1269
CHC205T	LI	174122	50	0.0003	A/T;40|AC/GT;3|CA/TG;2|AT;1|AAAAC/GTTTT;1|TA;1|AG/CT;1|GA/TC;1	A/T;0.8|AC/GT;0.06|CA/TG;0.04|AT;0.02|AAAAC/GTTTT;0.02|TA;0.02|AG/CT;0.02|GA/TC;0.02	fd1ab8d5-06cf-48b9-8c55-738d22454418/7bb238641bb0e57ac1dd7076793e07e0.bam	d598fd0f-6d84-4d21-9655-77fa61e6b6ae/1c86ae37495a07de46d37a9b776e78ea.bam	6946673	88	1e-05	11203	1209
CHC320T	LI	193524	47	0.0002	A/T;45|CA/TG;1|GA/TC;1	A/T;0.9574|CA/TG;0.0213|GA/TC;0.0213	e82d3a03-8852-46f3-9029-02134dafec08/b2bb74cfc35d08d4b38881755dcc76de.bam	3c669168-b142-4292-8a62-8dca6f0bd2c4/d85d950111c04ef170317bd35234cf84.bam	7562790	94	1e-05	11202	1083
CHC429T	LI	172335	42	0.0002	A/T;39|CA/TG;2|C/G;1	A/T;0.9286|CA/TG;0.0476|C/G;0.0238	4884bd78-4002-4379-89f5-5855454ff858/dd2634abf305355b409596e542b9d9bc.bam	adbee5b2-f26c-47c9-b4f6-44f155099f3a/4ab27de1aaaa7729fa18b39a6b09ae60.bam	7020992	81	1e-05	28164	1529
CHC433T	LI	156346	78	0.0005	A/T;71|AC/GT;4|CA/TG;2|TA;1	A/T;0.9103|AC/GT;0.0513|CA/TG;0.0256|TA;0.0128	e6aa7eda-8df8-4379-816f-234852b33d14/eef109a1f4d8cc5a3ba34cd762ee13f9.bam	a640ae49-d4cd-4cf3-af42-e59dc11e1dd1/c67baaf2ea0af6ad82cb4f4d28f0e7e2.bam	6556977	163	2e-05	39471	1827
36e1d9cc-32ec-4a0a-8fb1-c46f058a6fb8	LI	194763	47	0.0002	A/T;42|C/G;2|AC/GT;1|TA;1|AG/CT;1	A/T;0.8936|C/G;0.0426|AC/GT;0.0213|TA;0.0213|AG/CT;0.0213	0ed569f7-0ebf-4388-81fb-96683844cf70/PCAWG.bab3d6d0-e5fb-4fb2-beb7-14f10ad52060.bam	68fd1cce-4d48-4847-8629-a5c89fb037bd/PCAWG.ad74aa4d-61b1-4063-86bc-ca34234af9fa.bam	7544397	118	2e-05	12600	2012
4c3eda94-56f4-46d3-8c88-50d476e773f6	LI	193304	5	0	A/T;3|AC/GT;1|CA/TG;1	A/T;0.6|AC/GT;0.2|CA/TG;0.2	2cdd5a3f-e529-40e5-99bf-01d8d1d8caf4/PCAWG.baa5457a-3c81-4a05-895b-2daa80da053d.bam	20338fb3-b355-4553-bc65-6b3448e5f63b/PCAWG.26ffe1b3-f660-445b-a45f-86ff80d3be81.bam	7490890	13	0	4489	358
b9098b7c-eab0-4ef5-b968-8d3024bf32f7	LI	195125	64	0.0003	A/T;56|C/G;5|AC/GT;1|AG/CT;1|GA/TC;1	A/T;0.875|C/G;0.0781|AC/GT;0.0156|AG/CT;0.0156|GA/TC;0.0156	ae1af749-506f-420a-8374-0f4359f27da9/PCAWG.f63a6acd-37c1-4a5d-acd7-f2d6c23e53a2.bam	467bb0eb-a244-4997-bcdc-ea24873e5ad8/PCAWG.68a6d3a9-da03-4f1b-8234-e573c9946e34.bam	7527565	113	2e-05	12922	1717
305a5074-5384-45a0-985d-289b178d09f6	LI	194383	54	0.0003	A/T;52|AC/GT;1|TA;1	A/T;0.963|AC/GT;0.0185|TA;0.0185	a48aa4bd-5361-4d91-b878-a77f70d2b898/PCAWG.cbc2795a-5683-4116-a15a-4e032bc8a587.bam	695acc82-0a0c-4ee8-9b9d-6681d4a6ae8a/PCAWG.03b78b3d-3921-4a70-ab82-2bd797a2491c.bam	7509024	103	1e-05	12743	1634
5d58b984-e0b8-4237-a576-0e9d4079599e	LI	195278	23	0.0001	A/T;19|C/G;2|AC/GT;1|CATC/GATG;1	A/T;0.8261|C/G;0.087|AC/GT;0.0435|CATC/GATG;0.0435	f00434bb-cecf-4c51-938b-340cc4cbbc83/PCAWG.690738c1-c888-4c61-9333-ef6bb02a7bb8.bam	93aa379b-1734-481c-93bd-6a1ade2f76d7/PCAWG.fd41c4bb-1309-4edc-9e75-fd30cdee6f00.bam	7554554	39	1e-05	4615	1268
f1a4f60a-5228-47cd-883f-ff8d2dfe1633	LI	197017	96	0.0005	A/T;90|CA/TG;3|C/G;2|AG/CT;1	A/T;0.9375|CA/TG;0.0313|C/G;0.0208|AG/CT;0.0104	2bd871b1-298b-473f-8aa9-345b6faedee9/PCAWG.af9e5e0d-db6b-4dee-84a6-c99462e9f71e.bam	ef32ea59-94dc-48f9-bef6-2d0fddb3267c/PCAWG.b445f98f-05d4-458b-9141-4dee44774660.bam	7574034	157	2e-05	9632	1743
a2f143d6-ba07-4ff0-960d-b29c3c716665	LI	195773	58	0.0003	A/T;54|AT;2|TA;1|C/G;1	A/T;0.931|AT;0.0345|TA;0.0172|C/G;0.0172	70889024-4f5e-4a22-93d5-afb2cfa9e245/PCAWG.6dff929b-cb54-46c8-8bff-cc173c9883b2.bam	4aec7e21-7c03-4b36-8dc6-216cfeb98f6c/PCAWG.f79e13f5-c011-47b0-b252-018133b8400f.bam	7584369	96	1e-05	6544	1442
47e5ff56-9534-4fcf-a593-33027e877f93	LI	191003	69	0.0004	A/T;62|C/G;4|CA/TG;2|GA/TC;1	A/T;0.8986|C/G;0.058|CA/TG;0.029|GA/TC;0.0145	39feeb63-d1e3-4a15-98bf-d03811f18b84/PCAWG.4da66b24-edc0-4b89-973a-df93e255cdfb.bam	aa311346-5b87-4b28-8593-3a26cbef395d/PCAWG.cace742e-5c92-44ad-b9e6-7c1153ca6f05.bam	7397782	147	2e-05	18427	1624
6b50391f-d890-4ca0-b942-beab0f8bf1c9	LI	181370	55	0.0003	A/T;50|C/G;3|AC/GT;1|CA/TG;1	A/T;0.9091|C/G;0.0545|AC/GT;0.0182|CA/TG;0.0182	ccb3d6de-3738-4e05-aa59-4319fe4f7b04/PCAWG.c7644a1d-3520-4b91-b2c1-f36ecfbcdd35.bam	3eda93ae-3d38-4ad3-904e-48e230f1c23b/PCAWG.edc29b57-9243-40e4-a9df-8d69fd1c3774.bam	7180126	101	1e-05	9471	1575
352fbbb4-88a5-4354-b1fa-3a01da3fbfa7	LI	190281	12	0.0001	A/T;9|CA/TG;2|TA;1	A/T;0.75|CA/TG;0.1667|TA;0.0833	6fa01230-2105-4133-b4cb-3f2af0d6a11f/PCAWG.6ce54f18-fe47-44f1-a183-5adaeb967db8.bam	0be33d29-8ad9-4456-b6e1-6d5ea29026f7/PCAWG.a3173d77-4d11-447a-b952-56b474b2582a.bam	7442366	19	0	3838	1449
d252f328-4583-4e97-9a71-bb2885f06f73	LI	185455	65	0.0004	A/T;62|GA/TC;2|AC/GT;1	A/T;0.9538|GA/TC;0.0308|AC/GT;0.0154	efc636af-51db-4d12-aa28-9d33143e9734/PCAWG.70ddc5d6-43d5-43e3-bbd4-33c905d7d5d8.bam	b78ff6eb-2767-48da-a9ab-bcf672f8d011/PCAWG.b7fcfb70-5390-4b50-b5cb-3308fb098226.bam	7308082	118	2e-05	10006	1232
c36213e4-c057-46f5-ada5-f1f921855bb4	LI	195271	18	0.0001	A/T;17|C/G;1	A/T;0.9444|C/G;0.0556	dd785649-5e53-49f6-af57-4de20f4162e6/PCAWG.87b8e5c8-5d20-4e54-a6c6-e466973c2e5d.bam	eeb358f0-b5dd-4ac3-807c-f678c660321c/PCAWG.89b9fc71-bc34-4a55-8a2b-23ab3c6d690d.bam	7536191	43	1e-05	7119	2024
1127b561-ea40-4d5e-95df-daa0a5ebc1e4	LI	191400	72	0.0004	A/T;65|C/G;3|AG/CT;2|AC/GT;1|CA/TG;1	A/T;0.9028|C/G;0.0417|AG/CT;0.0278|AC/GT;0.0139|CA/TG;0.0139	df5b641e-38a0-4edd-b48f-7cbe1f336741/PCAWG.34e201c1-0226-4d63-a68c-96c885d22ad8.bam	e26d4332-d58d-4a18-968c-de4f62039db9/PCAWG.4c8b8e4b-6687-4577-9c3b-d18aa21103c9.bam	7420887	146	2e-05	19209	2016
c016d025-3c92-41c5-b846-493b1fcce79e	LI	195725	24	0.0001	A/T;21|CA/TG;1|GA/TC;1|C/G;1	A/T;0.875|CA/TG;0.0417|GA/TC;0.0417|C/G;0.0417	ca4041f4-0198-4e9e-a804-5fa83e44c508/PCAWG.5325202a-2404-4817-8ed9-87949826be7e.bam	d1708a81-23d7-4f7c-9281-013204cbecb3/PCAWG.7884d6fc-8f67-4f87-a796-564d727331b9.bam	7576492	46	1e-05	7166	2248
c285c2fa-24b4-47a1-874d-86e74b002b05	LI	196719	29	0.0001	A/T;27|TA;1|CA/TG;1	A/T;0.931|TA;0.0345|CA/TG;0.0345	6f9822e3-9a28-43da-baf9-31f7c563aaa4/PCAWG.b125aa08-5be2-485c-9d13-26d0d84ac750.bam	b6c88f63-6bad-4019-9590-8bf970688dd3/PCAWG.113b2808-cffa-4253-bd8d-1c3287e16c9e.bam	7591531	74	1e-05	7618	1893
484a41c8-fcaf-488d-97dc-bfe6a4b88a95	LI	188460	108	0.0006	A/T;102|C/G;4|AC/GT;1|TA;1	A/T;0.9444|C/G;0.037|AC/GT;0.0093|TA;0.0093	791488c7-625a-4199-a6a2-8c22e26c8af2/PCAWG.849069bd-4533-468d-8bd6-e97598b93a12.bam	4d997b17-20fb-46ac-8512-aea0797a1a43/PCAWG.5ad77998-53d6-482b-91e3-a6c78a0ad8e9.bam	7324463	183	2e-05	14426	1874
96517058-18d2-4847-8085-768ca8aa1565	LI	192171	285	0.0015	A/T;271|C/G;5|AC/GT;3|TA;3|AT;2|CA/TG;1	A/T;0.9509|C/G;0.0175|AC/GT;0.0105|TA;0.0105|AT;0.007|CA/TG;0.0035	eb1c0d84-cf61-422c-880c-780d476a0cf2/PCAWG.6d13554e-30ea-4bef-95bf-236ffe6a3c3b.bam	f932096e-b3eb-4aea-85db-54bec6b82911/PCAWG.02de548c-fe3e-4932-8166-0536904f3e74.bam	7452697	485	7e-05	69028	3685
c1d9ed06-7498-4c6c-a0de-dbf28e868109	LI	189364	120	0.0006	A/T;110|C/G;4|TA;2|CA/TG;2|AC/GT;1|AT;1	A/T;0.9167|C/G;0.0333|TA;0.0167|CA/TG;0.0167|AC/GT;0.0083|AT;0.0083	d3ce40d8-b888-417e-bf2b-fd2082c03abc/PCAWG.f180974e-bb9d-4f8d-845a-517aed82e611.bam	eb99e5d1-80f7-446a-a40d-09fe8257ec24/PCAWG.43715dc6-f216-4cbc-bb2c-44eb03252489.bam	7355322	208	3e-05	9292	1707
9c681cd9-25fb-42ac-aa6b-bb962882fa22	LI	190088	82	0.0004	A/T;71|C/G;4|CA/TG;3|AT;2|ATC/GAT;1|GA/TC;1	A/T;0.8659|C/G;0.0488|CA/TG;0.0366|AT;0.0244|ATC/GAT;0.0122|GA/TC;0.0122	bd1eef8c-50f3-484f-9659-2ad7eec3d1c3/PCAWG.0c9e10aa-066a-4e2f-95a4-44a4305aca01.bam	c8185dbc-7c61-4f2b-bbd6-b8fcb14f68ea/PCAWG.2c762701-c48b-466a-85f2-9bf4c4ea4dca.bam	7387101	148	2e-05	9009	2242
7fc7b316-f3d3-4e71-9417-423fe334e6bc	LI	194803	75	0.0004	A/T;69|C/G;3|AC/GT;1|AT;1|GA/TC;1	A/T;0.92|C/G;0.04|AC/GT;0.0133|AT;0.0133|GA/TC;0.0133	2cac40b7-b98a-44c6-a22b-d466a2334a32/PCAWG.ba930999-fdd9-4d6f-a89e-ad76ee93be77.bam	87e34cfa-795c-44d9-906d-742c682239cd/PCAWG.a46cafee-ec45-4109-bc31-b9b98fcbff28.bam	7550876	127	2e-05	33493	2188
1c00925b-7328-4db0-b930-04aab2d80719	LI	190680	135	0.0007	A/T;130|GA/TC;2|AC/GT;1|CA/TG;1|C/G;1	A/T;0.963|GA/TC;0.0148|AC/GT;0.0074|CA/TG;0.0074|C/G;0.0074	f0b31ba6-d9ca-4758-80e0-f386ee1194f7/PCAWG.29034096-d0af-4a86-b348-1c918253a9ef.bam	e39c1daa-c784-4587-ae64-34fe57c73f2e/PCAWG.e96e162e-067b-4b4a-9b1d-8627dcffada7.bam	7369160	198	3e-05	11725	2480
29b92b51-7ba3-42a9-97d3-6a9b5e43f928	LI	189084	214	0.0011	A/T;203|CA/TG;4|C/G;3|AT;2|AC/GT;1|CATC/GATG;1	A/T;0.9486|CA/TG;0.0187|C/G;0.014|AT;0.0093|AC/GT;0.0047|CATC/GATG;0.0047	d80af3a7-c8e0-4384-9b9f-0725922f3328/PCAWG.e90face2-45a7-4489-9669-2f679a4654c2.bam	d6c4c30b-67a8-49d4-834a-d16ea1ed027c/PCAWG.5a038122-9b9b-4acb-98fc-920973813fb1.bam	7352929	359	5e-05	17939	2418
d02597f8-3ac7-4165-a65f-0e134e5d215b	LI	194424	61	0.0003	A/T;57|C/G;2|TA;1|CA/TG;1	A/T;0.9344|C/G;0.0328|TA;0.0164|CA/TG;0.0164	7c27374f-0111-46e5-87a5-753a0e869878/PCAWG.211a5de5-ce10-43ae-86b8-3ed5066999bf.bam	c66ef0c7-4ba8-4228-a836-f7563e5a457f/PCAWG.faf3d7eb-1b88-4640-888e-a2c8caa0d402.bam	7541311	123	2e-05	12548	1730
6b25a78f-20dc-4ccc-b4c0-f9885d16725d	LI	195027	34	0.0002	A/T;33|TA;1	A/T;0.9706|TA;0.0294	9f27a302-99d3-40e6-a931-968ea41461ad/PCAWG.91d37396-75fe-4533-af84-ba3ef47b7183.bam	dd22dbb3-90af-4f1c-bf8b-2e7df8d57454/PCAWG.d18a2764-f092-42f6-9e55-dc1d93545440.bam	7550676	70	1e-05	14241	1660
90611290-e44c-438e-91aa-f3b83dae3b71	LI	196347	34	0.0002	A/T;33|TAGA/TCTA;1	A/T;0.9706|TAGA/TCTA;0.0294	feae892a-1c04-44ba-8e2f-1355cbbfd3bc/PCAWG.f98211ee-b704-4202-9c42-26e171022cd0.bam	2028134e-4c46-49cd-91c4-9a044d7200e6/PCAWG.4e6493cb-919e-4406-a6aa-b71b0bda9f88.bam	7573580	96	1e-05	27309	2136
4cff8590-559e-4204-8635-96e11bfeda68	LI	194859	27	0.0001	A/T;24|CA/TG;2|AT;1	A/T;0.8889|CA/TG;0.0741|AT;0.037	83e7fa25-7ac5-4c56-a594-4e464bd375e7/PCAWG.99a3eef8-7d74-4a01-a0ef-c3a4919cece6.bam	59a16715-7b67-402a-af7d-66088fafc886/PCAWG.6f58eb6b-9f49-41ad-ab11-0eda3b4100ba.bam	7521070	76	1e-05	17705	1735
50ee360c-e3df-4888-9999-ebb88e271d08	LI	196576	51	0.0003	A/T;48|C/G;2|AT;1	A/T;0.9412|C/G;0.0392|AT;0.0196	b1bde2fa-cbf7-4ed3-aebf-46819437c3db/PCAWG.48adf55e-2ece-4238-9f55-cb43eab0f4e9.bam	f0943d39-38fa-4c87-9a8e-708c7e098725/PCAWG.17441329-0f3e-40a4-a041-c6262fb3678a.bam	7596002	95	1e-05	9914	2455
2bff30d5-be79-4686-8164-7a7d9619d3c0	LI	186284	104	0.0006	A/T;96|C/G;4|AT;2|TA;1|CA/TG;1	A/T;0.9231|C/G;0.0385|AT;0.0192|TA;0.0096|CA/TG;0.0096	b31ffa14-361d-4416-90b6-376f3491039c/PCAWG.4f0df483-8f5f-4f99-af45-83a1b1e7ba4d.bam	56daf17f-8db5-4c85-a80b-bffa92c5f0c5/PCAWG.796dceb2-369e-4cb1-a53c-75f53c904ece.bam	7273458	193	3e-05	17637	2198
dcf45005-7e6d-4c26-9994-f973da7e814f	LI	195691	79	0.0004	A/T;76|AC/GT;1|TA;1|CATC/GATG;1	A/T;0.962|AC/GT;0.0127|TA;0.0127|CATC/GATG;0.0127	c4a7611a-059d-49c9-a57d-5bfeeb27f418/PCAWG.a9f66b25-0f29-4f7d-8e98-fb00d3e7db70.bam	2252c407-82b3-4595-94d3-ccf8734a8618/PCAWG.dfa63f7d-b956-4dff-8978-b3fa6aa27646.bam	7541402	143	2e-05	9882	1359
d6ccfd6f-2ea9-499d-a25d-4ba9d4a9258e	LI	194880	22	0.0001	A/T;19|AC/GT;1|AT;1|CA/TG;1	A/T;0.8636|AC/GT;0.0455|AT;0.0455|CA/TG;0.0455	518f1320-5833-461b-9eca-0bd3de52c5e4/PCAWG.871a5eda-14c1-4892-9e1f-cf087d454c30.bam	66e9412d-08d0-439d-9261-b5ce71949b70/PCAWG.c87aa49d-34a4-4021-bd1d-0187a8e7756c.bam	7539296	70	1e-05	11040	1531
84a0bc36-9f29-4b23-aee1-bf5ff71f697b	LI	191801	40	0.0002	A/T;39|C/G;1	A/T;0.975|C/G;0.025	9efafc90-fce6-4d24-8107-ae88f754c093/PCAWG.163b5787-4a8e-4d25-a785-71f4eaf0c342.bam	82cf810f-0957-43cd-9dac-4169ea9d7c14/PCAWG.56ffda33-ec05-4f98-9179-1f1ed6fd9f0e.bam	7466007	67	1e-05	9697	1989
03c88506-d72e-4a44-a34e-a7f0564f1799	LI	195084	75	0.0004	A/T;65|CA/TG;4|AC/GT;3|TA;2|GA/TC;1	A/T;0.8667|CA/TG;0.0533|AC/GT;0.04|TA;0.0267|GA/TC;0.0133	e3f41f71-a53a-4ad2-97bf-e11092230b92/PCAWG.ae31e275-6c07-47a6-9e75-de5f750af08f.bam	a0ea4690-46b9-43bd-80bb-7ca693227970/PCAWG.400c1b65-094b-42d4-a3b2-f01386eb7164.bam	7529613	140	2e-05	10588	4910
6e6ad1a2-f1eb-44d1-9852-f5752afcf5eb	LI	187843	95	0.0005	A/T;93|C/G;2	A/T;0.9789|C/G;0.0211	56e2183e-205a-4d07-98be-425ab0acac94/PCAWG.f3dd5d7c-9093-408f-9ff4-5ed8e35438cc.bam	14aee0f9-f997-48ac-a0f8-5bfccdaa517a/PCAWG.3e9fe7eb-69ad-465e-8f91-282642b672d4.bam	7363700	195	3e-05	21143	2395
70422e6d-cb1f-4284-8be9-1d4517ffad60	LI	179459	55	0.0003	A/T;51|C/G;2|AT;1|CA/TG;1	A/T;0.9273|C/G;0.0364|AT;0.0182|CA/TG;0.0182	d185ce4d-b327-4ba7-afb8-dbb1c1c3701c/PCAWG.33636177-6ff6-4aec-bb5b-d4ff2f5d75d3.bam	31299542-abeb-4824-a4dd-4fbb8cde7a1c/PCAWG.368769aa-f94f-4b1a-a910-f054006dc651.bam	7043383	109	2e-05	16944	2210
5df489bc-6178-49e4-8a42-506f70300dff	LI	187026	99	0.0005	A/T;94|C/G;4|CA/TG;1	A/T;0.9495|C/G;0.0404|CA/TG;0.0101	8e826c57-4eac-45e0-a3cf-337cd2d34d26/PCAWG.43e44e9e-fc3e-479c-ac35-e3c82b77ffd2.bam	0ed99c0a-da9a-4d7d-aa4e-e08bb6e48168/PCAWG.d2cc26b2-996a-4311-8dc4-129c08dbb22b.bam	7257066	165	2e-05	10708	1878
463bf060-8ba6-4a73-8173-172025f7b527	LI	192572	66	0.0003	A/T;60|AC/GT;2|AT;2|CATC/GATG;1|C/G;1	A/T;0.9091|AC/GT;0.0303|AT;0.0303|CATC/GATG;0.0152|C/G;0.0152	1567aacb-b7f3-4ba5-9325-a32af81e6746/PCAWG.37865a58-d7d6-470f-badd-9218ac3aa053.bam	38a58051-8326-4ed0-a3b7-88db2f8ba93c/PCAWG.7ca34534-e8ae-4ae1-b20b-80aab7003027.bam	7497272	132	2e-05	15603	1827
c05adc19-2e01-4712-a35a-69eee4d40998	LI	188565	143	0.0008	A/T;139|TA;2|CA/TG;1|C/G;1	A/T;0.972|TA;0.014|CA/TG;0.007|C/G;0.007	7b9e7873-f2d4-4bee-bcb4-744b90761466/PCAWG.4f2e557d-91ed-49ca-9dde-f7fa7f2e5fe0.bam	69131203-cb8d-4c72-b947-0fa8a77ca91c/PCAWG.77d95ff9-4f58-4820-9de5-ed6a8d3e7263.bam	7371674	237	3e-05	20592	2511
343fcbc2-f30c-4ffa-a0b3-f5bb21e5e70b	LI	195491	53	0.0003	A/T;51|TA;1|C/G;1	A/T;0.9623|TA;0.0189|C/G;0.0189	d93551d7-c2d5-4be6-86d0-58f1bc1944bf/PCAWG.8d7c4658-d855-422d-8e1d-495215d4ecf1.bam	11d78628-9b6b-4aa3-9e62-9383bd568fb8/PCAWG.a129f834-74c7-4faf-b81e-b3fe00433851.bam	7527519	100	1e-05	8613	877
84fe77b4-f6cc-49bf-a6b9-1621ec9394f8	LI	191699	81	0.0004	A/T;76|CA/TG;2|C/G;2|AC/GT;1	A/T;0.9383|CA/TG;0.0247|C/G;0.0247|AC/GT;0.0123	4063f76f-6456-492c-bbd0-2dc998b24565/PCAWG.67c4645d-cef3-4ac4-97d3-82caf616cdaa.bam	f711b58d-8d6c-418c-bbc0-25f94cddda88/PCAWG.4febf556-e763-423b-9ac0-5aed4dc862d7.bam	7469794	144	2e-05	15806	2347
5ead73fe-1c34-48ed-b20d-89fc3c82dbd6	LI	193502	91	0.0005	A/T;87|AT;1|AC/GT;1|CA/TG;1|C/G;1	A/T;0.956|AT;0.011|AC/GT;0.011|CA/TG;0.011|C/G;0.011	aebfb90d-4e35-451e-afe7-ec4e583a1764/PCAWG.e0bee95d-3db2-4c44-9604-6526f755e889.bam	25381000-8d69-47d3-8d2f-34716f75a4c4/PCAWG.fbe95c81-af7f-40fc-a999-70ec2736d301.bam	7500091	157	2e-05	5061	1600
992d9566-b1da-421a-bf36-d23382b115fa	LI	195229	47	0.0002	A/T;44|C/G;2|CA/TG;1	A/T;0.9362|C/G;0.0426|CA/TG;0.0213	4f2f5a6d-5759-48b6-b0a2-827001eec34a/PCAWG.7173d8ec-3f8a-4280-8f70-ceb50bcfa798.bam	ebe8a821-2ec9-4d42-8bca-a411b7d5b26f/PCAWG.8865cec5-ae2e-495f-af40-bec60d0a0d83.bam	7547254	99	1e-05	12253	2359
d9c5493e-f969-4c04-a646-9a3134011021	LI	193454	114	0.0006	A/T;109|TA;2|AT;1|C/G;1|AAC/GTT;1	A/T;0.9561|TA;0.0175|AT;0.0088|C/G;0.0088|AAC/GTT;0.0088	c9a55e0c-0630-45e1-bd23-3b61f8c6f926/PCAWG.2822d1ec-93ee-48b2-b1d6-d66fd3cc9f49.bam	275e5d35-8687-4f1d-a03d-6bb49c2ad2c7/PCAWG.2f500a2b-aad6-40d1-8827-ba4d8d1454e4.bam	7508026	211	3e-05	9164	1986
7f03cb4b-60b1-460c-b761-402e7ca09b0d	LI	195053	5	0	CA/TG;2|C/G;2|A/T;1	CA/TG;0.4|C/G;0.4|A/T;0.2	17d3b43e-e347-47a1-b929-6175d95409f6/PCAWG.4388027d-8766-466a-b3a3-d22cde9a0796.bam	96327bd2-9381-4e69-9fa3-7adb9f7d75fe/PCAWG.aff62adc-6fae-4be9-b953-b23038182862.bam	7542014	8	0	3052	608
670f971f-a525-4ef8-91ba-610cfbaeb914	LI	192757	19	0.0001	A/T;16|C/G;2|CA/TG;1	A/T;0.8421|C/G;0.1053|CA/TG;0.0526	3b65701b-dbae-4bc3-a4f2-51ac6d078d99/PCAWG.d174441c-6712-4609-9c31-d27d6a5f66e1.bam	ce5278c7-722c-4603-85e3-4896dd4d5367/PCAWG.40d651d9-db31-48b8-b158-995d45e74dd0.bam	7498756	37	0	22026	1715
e30c64d5-e796-4cfc-8dc8-6e62bf97822f	LI	196996	69	0.0004	A/T;62|CA/TG;3|AC/GT;2|AT;1|AG/CT;1	A/T;0.8986|CA/TG;0.0435|AC/GT;0.029|AT;0.0145|AG/CT;0.0145	aa5f3d31-2bf5-451e-ae41-f19f6d7a0748/PCAWG.8829bdfc-961c-404f-87a2-222ed55f12c5.bam	e1f16576-9102-44de-88ed-892be7340067/PCAWG.b75e14f5-11dd-4a0c-a072-304f9ea40885.bam	7588908	134	2e-05	15957	2039
63adc09c-e1b1-40dd-9c35-2f8276b656fc	LI	192442	90	0.0005	A/T;85|C/G;3|CA/TG;2	A/T;0.9444|C/G;0.0333|CA/TG;0.0222	d65692f7-343c-4a79-9ccc-9d60a4cc1246/PCAWG.f96d6fa7-ea5b-45e6-9bf0-ecdd91761494.bam	b3759d7c-8a97-4e5d-8676-ae19c1553313/PCAWG.656245ea-58d6-4f10-871a-e23cb03845fe.bam	7453925	162	2e-05	14993	2121
3bacc189-01b8-46cc-a442-f393c0f428c6	LI	190941	134	0.0007	A/T;126|CA/TG;3|C/G;3|TA;1|GA/TC;1	A/T;0.9403|CA/TG;0.0224|C/G;0.0224|TA;0.0075|GA/TC;0.0075	dc49443b-4829-422d-a481-f774ba968652/PCAWG.05bf24e6-0bca-41b2-8945-6bee5d6764b4.bam	fbe96de3-ea55-46cd-8799-da03cb291d40/PCAWG.9655e82b-a364-45d2-b2b4-0672714989d3.bam	7452763	208	3e-05	8408	1925
b9f03936-1de5-4330-8b0f-6d0ab533876e	LI	194010	120	0.0006	A/T;108|CA/TG;6|C/G;5|AT;1	A/T;0.9|CA/TG;0.05|C/G;0.0417|AT;0.0083	49f36495-4d8f-4c5a-88da-1f7e4a0b8964/PCAWG.c04b93cf-17b9-464b-840d-9d98c7f4d9cd.bam	f001f922-465d-4035-8fd0-fe473103a256/PCAWG.dd0cd71d-72dd-4b1c-a723-841cc97592db.bam	7501402	197	3e-05	5373	2183
4904d56f-0fe7-4482-8f6d-9e54d261f399	LI	197654	68	0.0003	A/T;62|AT;2|AC/GT;2|C/G;2	A/T;0.9118|AT;0.0294|AC/GT;0.0294|C/G;0.0294	1f9e480f-1c5a-44fa-8ebf-09d5f36d2810/PCAWG.8f6508df-e004-4d63-a68e-26c83f506920.bam	16cb9c60-a9b1-4b44-b49b-5a1182ea3d83/PCAWG.eb3dd9f7-7d02-472d-ab5f-61e86f5b1f0a.bam	7621912	146	2e-05	18868	1891
f7e9eed5-7a0b-4b2d-bea3-fd8c42a3b90e	LI	196405	150	0.0008	A/T;145|C/G;3|AC/GT;1|CA/TG;1	A/T;0.9667|C/G;0.02|AC/GT;0.0067|CA/TG;0.0067	e1e228ca-7ce0-44d8-b9ca-4095ed564cfa/PCAWG.7fad0c37-d9b0-4f02-9f45-78c66a77e6b5.bam	7403d757-d739-495b-a898-a2b4b9361a88/PCAWG.80f0a03e-dfea-4450-a3d9-630cc17ca8d4.bam	7582048	301	4e-05	7582	2253
81a8b064-e735-455f-b2db-af7ae11daac4	LI	193001	144	0.0007	A/T;131|CA/TG;6|AC/GT;4|AT;1|TA;1|C/G;1	A/T;0.9097|CA/TG;0.0417|AC/GT;0.0278|AT;0.0069|TA;0.0069|C/G;0.0069	f7878f38-4c60-4d15-9eb7-1c8ae79f8124/PCAWG.a1c6172d-d3a5-4020-b53c-c356a352adfc.bam	043cce76-19ef-43ee-8876-e2ae6556254d/PCAWG.ccad54ca-89fb-4818-8122-cfe86373449c.bam	7468814	255	3e-05	22854	4810
0d259ac2-03d1-4814-9b0b-d05e3a6029b7	LI	195289	45	0.0002	A/T;42|AC/GT;1|TA;1|C/G;1	A/T;0.9333|AC/GT;0.0222|TA;0.0222|C/G;0.0222	a827bc24-2c0a-44ac-a302-9ba9786a1279/PCAWG.a0c324a8-d1e5-4e6f-991a-78bb9dbca668.bam	b33d25d5-779c-4a57-83c1-15519e68c10d/PCAWG.9d74037c-99c0-45ac-a234-b770af4e15e4.bam	7556359	82	1e-05	9336	726
4624fd20-e2ad-4826-b606-a694b04e1076	LI	182147	18	0.0001	A/T;16|AT;1|AC/GT;1	A/T;0.8889|AT;0.0556|AC/GT;0.0556	b72cc893-8d00-4cf4-8b28-8bb03aa8a0ad/PCAWG.981f6ae8-386a-40f9-bbb5-dabfaff13013.bam	de35ba15-5cc2-496e-adf7-f292fef9bdba/PCAWG.b31e8738-f9df-4825-a5e3-9e216f6ad920.bam	7160597	37	1e-05	12917	1496
41840dc1-5ea2-4f01-a0d4-8b65add641c8	LI	189726	36	0.0002	A/T;31|CA/TG;3|AC/GT;2	A/T;0.8611|CA/TG;0.0833|AC/GT;0.0556	fddf3437-00da-4089-a53e-f1a2b689162c/PCAWG.3549d107-3707-4bda-9e2d-7968b6016e44.bam	5f839246-004d-4316-ad33-0f7b7293e4f5/PCAWG.6a9a2b79-2687-40bf-bc6d-9da364f8dd2c.bam	7384076	66	1e-05	4977	1417
HX18T	LI	197752	66	0.0003	A/T;62|AT;1|AC/GT;1|CA/TG;1|C/G;1	A/T;0.9394|AT;0.0152|AC/GT;0.0152|CA/TG;0.0152|C/G;0.0152	ba2a4ae1-28a0-4b4f-bd7e-af7778f665dc/3e4289ba92974aa2a3d69e42aa77257c.bam	9322d80b-71c1-46b8-952c-83e18681e05c/c7a3160a5775699af2be594aa30ff474.bam	7612685	129	2e-05	9038	1155
HX20T	LI	197479	58	0.0003	A/T;55|C/G;2|AC/GT;1	A/T;0.9483|C/G;0.0345|AC/GT;0.0172	89f90bdb-e789-446f-888a-6096e7c1f004/600c5bf39104b8e52c982bffc05e1e7f.bam	f3c16b7f-d782-4462-a914-93871429273f/7df129a001cdcee7d0f00d554c8ad47f.bam	7627636	112	1e-05	6913	969
HX21T	LI	198321	47	0.0002	A/T;43|C/G;2|AT;1|AC/GT;1	A/T;0.9149|C/G;0.0426|AT;0.0213|AC/GT;0.0213	0ea1784d-bdf2-4cdd-a146-f3d13054619d/26ee0247bc00f71a1d6133058ca04152.bam	ec0ea7d5-9032-4eb7-b004-460a78103a05/e74441c55453f44eb69cf1540e7dc4ad.bam	7645422	103	1e-05	18580	1193
HX22T	LI	189893	50	0.0003	A/T;41|CA/TG;4|AT;2|AC/GT;1|GA/TC;1|C/G;1	A/T;0.82|CA/TG;0.08|AT;0.04|AC/GT;0.02|GA/TC;0.02|C/G;0.02	ed986020-4d6d-4ece-871e-751e72aaa16f/62d21ea0ca4f0f14ebbc9a289bc14dcd.bam	26fa2b57-20cd-4cb0-8303-1c1df79ba8a0/25dd2ccaaa99028b0791ac425e609474.bam	7441901	83	1e-05	4907	785
HX23T	LI	198185	57	0.0003	A/T;52|AC/GT;2|AT;1|AG/CT;1|CA/TG;1	A/T;0.9123|AC/GT;0.0351|AT;0.0175|AG/CT;0.0175|CA/TG;0.0175	788ac362-177d-40ea-a836-067a5d26cf00/1f604cd6d547fe34fa7a1e391df182ff.bam	0e212f92-f4f0-4c1b-95e5-c8a03e971797/0be7b38c63ffc11ca241ab1ebda7defd.bam	7643936	88	1e-05	4415	885
HX24T	LI	196136	101	0.0005	A/T;94|C/G;3|AC/GT;1|AT;1|TA;1|CA/TG;1	A/T;0.9307|C/G;0.0297|AC/GT;0.0099|AT;0.0099|TA;0.0099|CA/TG;0.0099	ee3e94b5-545b-45e2-8ecd-6672e59ebfaa/40c4ad7d4c26095f4e6d2d481eba4ce5.bam	09bf9a0a-cc54-47e4-869d-00c9f5fe6994/12618023223ce42839d65965b478c4c6.bam	7597167	199	3e-05	12947	1594
HX25T	LI	198564	81	0.0004	A/T;77|C/G;4	A/T;0.9506|C/G;0.0494	5bf30d47-232f-4291-b08c-4c9d30ab0972/559722dcd8568809e85a7104e524203c.bam	41832fb7-7e10-446e-9529-eb540df4496d/228086cb7d48f7a586b938c41ee9382a.bam	7649596	126	2e-05	5988	907
HX26T	LI	197413	55	0.0003	A/T;48|AC/GT;2|TA;2|CA/TG;2|C/G;1	A/T;0.8727|AC/GT;0.0364|TA;0.0364|CA/TG;0.0364|C/G;0.0182	f8b1e9c6-4c90-40fc-b0a6-b28b7dd0d297/349958cfc25b85881a309f349a1ca986.bam	863b0ed2-d040-4125-a2a7-37f0d5fe2c59/8dc7de088b29d51a0e3c5708fd49b9be.bam	7628441	88	1e-05	7441	991
HX27T	LI	197072	63	0.0003	A/T;57|AC/GT;2|CA/TG;2|TA;1|C/G;1	A/T;0.9048|AC/GT;0.0317|CA/TG;0.0317|TA;0.0159|C/G;0.0159	db0daa70-aa76-47e9-8ac8-dd9f958ec286/08672ddcb4c9913393b4225c7dd1c2eb.bam	121faea3-eb4a-4f1a-b1e5-021884380141/cdd62293bbcdfa30a0890d944317de79.bam	7624668	145	2e-05	15044	1468
HX28T	LI	198571	57	0.0003	A/T;53|C/G;3|AT;1	A/T;0.9298|C/G;0.0526|AT;0.0175	a3f925b7-297b-4dd3-aaa5-ddc96eab222f/d8bfea9e26699c2280aa8fd6b8cf4040.bam	2bab5c76-4597-4b5b-95d3-f93daf2ddbb3/f8b3adbc03e721c471ff5f6453a95bfb.bam	7649989	125	2e-05	13227	1154
HX29T	LI	197825	52	0.0003	A/T;45|C/G;4|AG/CT;2|CA/TG;1	A/T;0.8654|C/G;0.0769|AG/CT;0.0385|CA/TG;0.0192	db08aaea-8cf1-493d-bf0f-27f58d68ec95/0951ae7ebc7a67731bbd3dda37d1ea40.bam	78ca1642-046a-4a61-a148-149d1cf1264c/9e7db53ff79c246d565a01a48c516509.bam	7638372	102	1e-05	12305	1197
HX30T	LI	198465	32	0.0002	A/T;26|AT;3|AC/GT;1|CA/TG;1|C/G;1	A/T;0.8125|AT;0.0938|AC/GT;0.0313|CA/TG;0.0313|C/G;0.0313	362a6ce4-3f88-4487-a084-f8dd01783dfd/9e76d8811f50cb14e866cae233778135.bam	e52616bc-de31-4a85-ba28-d27c65e78649/bc6a9759fdc029cd9886522f3f5b9fad.bam	7648600	78	1e-05	15491	991
HX31T	LI	197800	66	0.0003	A/T;59|CA/TG;3|C/G;2|AT;1|AC/GT;1	A/T;0.8939|CA/TG;0.0455|C/G;0.0303|AT;0.0152|AC/GT;0.0152	baf5aa20-c489-4201-9b0d-0f1dd2ef587a/5f37fb0f7d3fa4e1221d90827b3bf564.bam	9cbc0a7e-abd9-4010-abdb-22212c98897e/0abaed7ebc6f59b41b71c52b89a33e55.bam	7637864	130	2e-05	12093	1440
HX32T	LI	198456	102	0.0005	A/T;97|AC/GT;2|C/G;2|AT;1	A/T;0.951|AC/GT;0.0196|C/G;0.0196|AT;0.0098	029a3e3d-6ba7-44c3-b591-f74bdf8061da/ce4d5b15f2e197cc6f1b8d1f68f35496.bam	0888c23f-3b77-4c2f-a71e-1f8260d22bfa/f5b67e480c4571f1466f3155adabd352.bam	7647781	204	3e-05	11833	1201
HX33T	LI	197700	66	0.0003	A/T;64|AC/GT;1|CA/TG;1	A/T;0.9697|AC/GT;0.0152|CA/TG;0.0152	2737114e-c56d-446c-bb3c-c0c6cd43d8a3/2d4282c2af91d0075a395aa02532992d.bam	bd033e47-092c-4a88-8808-ff2e664babde/7bc9a7b77ee0dbd40310c486adae4b1a.bam	7630648	131	2e-05	17758	1194
HX34T	LI	196240	83	0.0004	A/T;76|C/G;4|AT;1|TA;1|GA/TC;1	A/T;0.9157|C/G;0.0482|AT;0.012|TA;0.012|GA/TC;0.012	da6967dd-5b37-47a4-9c90-32a75acb150d/da6f4d114da4f847838054e625ff5603.bam	3c29b4e4-9e91-4840-abe0-44036b7dd73f/89d47d7ce35846c116236f18d638b20b.bam	7600753	189	2e-05	18415	1794
HX35T	LI	193893	65	0.0003	A/T;58|TA;2|AC/GT;1|AT;1|CA/TG;1|C/G;1|GA/TC;1	A/T;0.8923|TA;0.0308|AC/GT;0.0154|AT;0.0154|CA/TG;0.0154|C/G;0.0154|GA/TC;0.0154	d2944b16-9e00-49c7-a24a-2faee2b8cceb/1914e78be9816dd197f3b9b21dbfd9ff.bam	edeabbf1-4bdc-4d36-93ba-36def935f3c7/ba9996e46430b22bf826a0cc4d472cd5.bam	7527913	149	2e-05	14402	1493
HX36T	LI	198005	82	0.0004	A/T;71|AC/GT;4|CA/TG;3|C/G;2|AT;1|GA/TC;1	A/T;0.8659|AC/GT;0.0488|CA/TG;0.0366|C/G;0.0244|AT;0.0122|GA/TC;0.0122	7b860b37-9f6c-44aa-9211-482f438683cd/f2b88b64dc372ab4b1370b7eb1ba8b56.bam	172bb3ee-0ae1-4485-af59-20b2438f3772/eda0b72b35c12b0674f587f80dcffbaa.bam	7641737	123	2e-05	20036	1349
HX37T	LI	186836	130	0.0007	A/T;124|AT;2|CA/TG;2|AC/GT;1|C/G;1	A/T;0.9538|AT;0.0154|CA/TG;0.0154|AC/GT;0.0077|C/G;0.0077	ab23ad32-e2eb-4af5-96df-b01d23b2b20c/536d65c849d124e69e84ec10bb56b0a3.bam	2656887f-8f41-4bac-9640-d727cd172773/32fcdf18f842c75a4046ba76ae568e4b.bam	7452367	228	3e-05	14789	2797
RK001_C01	LI	192869	122	0.0006	A/T;111|CA/TG;4|AT;2|TA;2|C/G;2|AC/GT;1	A/T;0.9098|CA/TG;0.0328|AT;0.0164|TA;0.0164|C/G;0.0164|AC/GT;0.0082	758b9586-c5bc-4b10-97dd-022cc3239c10/9a0051f3efd9042e12512b3472c56671.bam	131cad0d-4c0c-4281-bf70-35a4f997ea8e/5d2ebb6616cad80affcbf330347c1be2.bam	7400572	215	3e-05	26802	2048
RK002_C	LI	179541	72	0.0004	A/T;65|CA/TG;3|C/G;2|AC/GT;1|AG/CT;1	A/T;0.9028|CA/TG;0.0417|C/G;0.0278|AC/GT;0.0139|AG/CT;0.0139	50e6a84c-acfd-4d74-9d68-6a2c94d63e1d/b137f722414b6bf7d5b0feb822e67db3.bam	f9f47dd6-ef45-4606-9467-142a59ef6395/525968b1062dc369ca8f3466a28af453.bam	7055580	143	2e-05	17677	1855
RK003_C	LI	189516	55	0.0003	A/T;46|AT;2|TA;2|CA/TG;2|AC/GT;1|GA/TC;1|C/G;1	A/T;0.8364|AT;0.0364|TA;0.0364|CA/TG;0.0364|AC/GT;0.0182|GA/TC;0.0182|C/G;0.0182	a6031777-18af-4d05-97eb-409e7540f916/25e3efa2906508d75cd4e7b5d1ef87e9.bam	24716465-ab5c-437a-bb79-07ee92505315/1a28b5d0088201a6d5038e3f0bd05012.bam	7348699	122	2e-05	12591	1772
RK004_C01	LI	187089	62	0.0003	A/T;52|CA/TG;3|AC/GT;2|C/G;2|AT;1|TA;1|GA/TC;1	A/T;0.8387|CA/TG;0.0484|AC/GT;0.0323|C/G;0.0323|AT;0.0161|TA;0.0161|GA/TC;0.0161	317cd191-bbc3-463d-a171-69c8c84acad9/04fde3f82bbb481162ffecef7544aa9c.bam	b05501d7-22b5-4973-9bff-fa099190ee1f/e7d6648ee569bbe09a0558491fe39ad5.bam	7143224	137	2e-05	19975	2163
RK005_C	LI	163947	23	0.0001	A/T;15|TA;3|AC/GT;2|CA/TG;2|AT;1	A/T;0.6522|TA;0.1304|AC/GT;0.087|CA/TG;0.087|AT;0.0435	1f12a797-cabc-4294-b4c1-f076dd3308e4/34be143771d06e8dba97eb620edfa840.bam	c91982c2-2f32-4abf-96a5-3eecd6716ba3/813529c38dbade68e3e89ede80f897ec.bam	6436902	39	1e-05	122173	17193
RK006_C2	LI	185209	64	0.0003	A/T;56|C/G;4|AC/GT;2|CA/TG;2	A/T;0.875|C/G;0.0625|AC/GT;0.0313|CA/TG;0.0313	19948c05-dadb-4a7d-94e2-004ae7b4b01e/edf4f81d411743d5ef7e701a68cc1208.bam	58097866-9a52-4307-a6b4-8bf5e5f9c901/cf85208fe8bb3d17f77674fdde3b3b10.bam	6885964	153	2e-05	25511	2116
RK006_C1	LI	184349	56	0.0003	A/T;48|CA/TG;3|C/G;2|AT;1|TA;1|GA/TC;1	A/T;0.8571|CA/TG;0.0536|C/G;0.0357|AT;0.0179|TA;0.0179|GA/TC;0.0179	19948c05-dadb-4a7d-94e2-004ae7b4b01e/edf4f81d411743d5ef7e701a68cc1208.bam	6d229d09-c6fd-43e2-81db-9d5a3910c413/c816e85edb2da26ded3820bcbb448e8b.bam	6854090	116	2e-05	22843	2182
RK007_C01	LI	179373	73	0.0004	A/T;58|C/G;5|CA/TG;4|AC/GT;3|AT;2|TA;1	A/T;0.7945|C/G;0.0685|CA/TG;0.0548|AC/GT;0.0411|AT;0.0274|TA;0.0137	a449a60c-a138-48bc-8834-ac4b37d962cb/cc646d0ab0bf5abedaf427f81a437d84.bam	893d08af-8e49-4937-bc7d-395df7202d45/a5625e0263936d2506d9c48fe98d2d56.bam	6997480	137	2e-05	14672	1515
RK010_C	LI	184820	73	0.0004	A/T;63|CA/TG;5|C/G;2|AC/GT;1|AG/CT;1|GA/TC;1	A/T;0.863|CA/TG;0.0685|C/G;0.0274|AC/GT;0.0137|AG/CT;0.0137|GA/TC;0.0137	fe9e3b1d-cb51-446e-a4f1-1fdd1707a288/866c7e392932296b0e46762b9be4940c.bam	b3ccb581-2cda-4588-9d67-ec58e8ff6ff0/fccb1b95fb0ace4b13282e0d8391f427.bam	6912947	124	2e-05	10072	1400
RK012_C01	LI	192967	32	0.0002	A/T;22|CA/TG;5|AC/GT;2|TA;2|AT;1	A/T;0.6875|CA/TG;0.1563|AC/GT;0.0625|TA;0.0625|AT;0.0313	d5464c90-5286-4ed3-9158-3a8fa59db6db/86a74c9d266e11419189b81df02ab482.bam	4250713c-bfbf-4020-8240-eeab459fee88/02c56e60fa09238d168bfd759309d8f0.bam	7370679	71	1e-05	39249	8478
RK014_C01	LI	163580	46	0.0003	A/T;35|AC/GT;3|TA;3|GA/TC;2|AT;1|CA/TG;1|C/G;1	A/T;0.7609|AC/GT;0.0652|TA;0.0652|GA/TC;0.0435|AT;0.0217|CA/TG;0.0217|C/G;0.0217	03068af0-7356-47fd-ab36-8d11b0fae880/a5cbccc73e9d3e06951c7d095cbaf517.bam	2dfdc0db-24e3-4e56-abc3-4fdecddca7d0/612c4953245322da7edc7335cf53e658.bam	6586913	76	1e-05	7423	1184
RK015_C	LI	170287	66	0.0004	A/T;59|AC/GT;3|AT;2|CA/TG;1|C/G;1	A/T;0.8939|AC/GT;0.0455|AT;0.0303|CA/TG;0.0152|C/G;0.0152	86fdb03a-d2a8-4949-b016-b39d3b84aa26/6ff40ab5fc098119c9cf6d97f6c70046.bam	3993a1db-f118-4fe0-ab63-78267580032b/a681e8a21029420ce5275e0cd4a7a2b7.bam	6478025	134	2e-05	18338	1556
RK016_C01	LI	184045	51	0.0003	A/T;39|AC/GT;5|CA/TG;3|GA/TC;2|C/G;1|AAT/ATT;1	A/T;0.7647|AC/GT;0.098|CA/TG;0.0588|GA/TC;0.0392|C/G;0.0196|AAT/ATT;0.0196	cb02e0ba-f263-4ed6-8897-be6ccbedc40a/b9869d663adfb97ef93376ad5b5b9a1b.bam	e8adfb1d-0aaa-403b-a9c4-0fd8288f7450/6e132777dfc56c8b5287651c13860325.bam	6939892	100	1e-05	51229	1299
RK018_C01	LI	168790	16	0.0001	AC/GT;8|A/T;5|C/G;2|CA/TG;1	AC/GT;0.5|A/T;0.3125|C/G;0.125|CA/TG;0.0625	76eb1f77-b35e-4db1-9d19-24e05d78e728/7450c422a63151abff8dcd3c11b7ecc2.bam	062fa378-b481-4cdb-84da-f8c069f19d0a/861e04923cef3df4015606366390131b.bam	6745746	20	0	14480	2156
RK019_C	LI	172886	69	0.0004	A/T;58|CA/TG;5|AT;3|AC/GT;2|TA;1	A/T;0.8406|CA/TG;0.0725|AT;0.0435|AC/GT;0.029|TA;0.0145	8c44aabb-d8db-4023-b403-e85c3a2bdd06/b30340dc1be842da5ec010a976d61647.bam	57accc2a-d8d6-4440-af63-37279a95069c/97ace2f7fb41b232024573f27e09f155.bam	6672799	147	2e-05	45955	11595
RK020_C01	LI	175703	44	0.0003	A/T;41|TA;1|AG/CT;1|C/G;1	A/T;0.9318|TA;0.0227|AG/CT;0.0227|C/G;0.0227	77c67c28-4fac-4761-9dc7-dde22900cc43/27d9d8dda909f53568e397734e3a8385.bam	45103758-c57b-4440-8fec-1f0132cd0b99/6b6f1a89cb052b1fa8b0c2e740b2cc2a.bam	6556848	78	1e-05	8644	1126
RK021_C01	LI	158347	107	0.0007	A/T;94|CA/TG;6|AC/GT;5|C/G;1|GA/TC;1	A/T;0.8785|CA/TG;0.0561|AC/GT;0.0467|C/G;0.0093|GA/TC;0.0093	80539de6-694c-47e2-aec8-ed7cb32c53ae/1422f752f27540ec2fd8da242fb4a76f.bam	ae6c08cf-f54c-43cc-bd37-4887382a7bfe/7a00c29f1c0d4b7c348d7f1913a2802f.bam	6271057	187	3e-05	60541	6694
RK022_C01	LI	180107	223	0.0012	A/T;197|AC/GT;7|CA/TG;7|AT;6|C/G;3|TA;2|AG/CT;1	A/T;0.8834|AC/GT;0.0314|CA/TG;0.0314|AT;0.0269|C/G;0.0135|TA;0.009|AG/CT;0.0045	c5ed6a1c-3748-4082-883f-2013fd1666f7/a2d71d059a644cfb7c4b61ba0ec7f496.bam	63f70f52-16ce-405f-b95e-52f67437589e/55547b4b9b8dbee85c4117b43327a953.bam	7067896	406	6e-05	17401	2877
RK023_C	LI	186670	91	0.0005	A/T;85|CA/TG;2|AT;1|AC/GT;1|AG/CT;1|C/G;1	A/T;0.9341|CA/TG;0.022|AT;0.011|AC/GT;0.011|AG/CT;0.011|C/G;0.011	d3fc2ffb-14ac-4637-8b59-11c8a28b3a63/fed966ad69573bf7ea95b91dfd3e523e.bam	3e01ecd5-a959-44d9-a203-613245b9c1ed/34e6379a897d1c8af72c5f43d7444e23.bam	7027517	234	3e-05	24540	2429
RK024_C	LI	176980	43	0.0002	A/T;37|AC/GT;2|CA/TG;2|AT;1|GA/TC;1	A/T;0.8605|AC/GT;0.0465|CA/TG;0.0465|AT;0.0233|GA/TC;0.0233	46371c67-12a9-4dda-974f-245f2bf8b20b/306854b4b7661abc835209c3f4793b64.bam	bf9954fb-22db-4619-9cbf-1a5fbc8e8d65/5b356a61f17f38a17908d3796c1678d0.bam	6867653	67	1e-05	9262	1489
RK025_C	LI	184701	79	0.0004	A/T;67|CA/TG;6|TA;2|C/G;2|AT;1|AATGG/CCATT;1	A/T;0.8481|CA/TG;0.0759|TA;0.0253|C/G;0.0253|AT;0.0127|AATGG/CCATT;0.0127	94ff2af3-9bb2-4eeb-9320-f9a0afeb15ea/9027474aba5f88e17a2c5dc4cfdaa064.bam	a9fdb671-d046-4568-b07c-a5c905f105e6/21977b574768909b31ba8da89e738a1d.bam	7036560	148	2e-05	36970	8896
RK026_C01	LI	192873	57	0.0003	A/T;52|CA/TG;3|AC/GT;1|C/G;1	A/T;0.9123|CA/TG;0.0526|AC/GT;0.0175|C/G;0.0175	6baa787f-a68b-4e5f-a671-f36b2e532a97/e22138c876ed9dd09f93baa69dc1db12.bam	64f18f11-b132-425d-bdc8-f6d041bf8846/001642979e361dc2c60f0128740b258b.bam	7392283	100	1e-05	8534	1563
RK028_C01	LI	169312	103	0.0006	A/T;91|AC/GT;5|CA/TG;4|C/G;2|TA;1	A/T;0.8835|AC/GT;0.0485|CA/TG;0.0388|C/G;0.0194|TA;0.0097	fc0b9d5a-56ca-4a20-8db3-afd846c7f642/29ff2c633302032810b29d5e4c5a1cba.bam	1e1dc8a4-0620-4c80-a42a-30fe7c05410e/0db5c3f06366e2feb6c7b4a778aa5ec5.bam	6703534	221	3e-05	26200	2314
RK029_C	LI	185208	42	0.0002	A/T;33|CA/TG;4|AC/GT;2|AT;1|C/G;1|GA/TC;1	A/T;0.7857|CA/TG;0.0952|AC/GT;0.0476|AT;0.0238|C/G;0.0238|GA/TC;0.0238	9f66188d-09ae-4882-9536-604f9eeb7318/8845d810f7322c2202aa0b723a1d2435.bam	a9448302-a489-4697-b1ef-0ca8d922472c/8949159753ca10ab28cddc6eaaaecf66.bam	6924730	74	1e-05	16106	1265
RK030_C01	LI	161931	104	0.0006	A/T;95|TA;3|AT;2|C/G;2|AG/CT;1|CA/TG;1	A/T;0.9135|TA;0.0288|AT;0.0192|C/G;0.0192|AG/CT;0.0096|CA/TG;0.0096	cd2e9ea3-bf3b-43e6-aebb-196487fd580c/780ba75d4a2a76fda99f01e5bac5a9dc.bam	ebd336be-1b3c-41b6-9de2-94562435022b/ab216d3cfda436463c4c3725cbf3c703.bam	6466962	191	3e-05	18694	1645
RK031_C01	LI	189500	82	0.0004	A/T;67|CA/TG;5|C/G;4|AC/GT;2|TA;2|AT;1|AAT/ATT;1	A/T;0.8171|CA/TG;0.061|C/G;0.0488|AC/GT;0.0244|TA;0.0244|AT;0.0122|AAT/ATT;0.0122	154dc7cd-c93d-48cf-b518-4a264855f90a/16dcf973f7778f75675e228f0a9d85db.bam	2246d8f1-a070-4304-9b85-f3c3db02ac42/7fdbaca59a0bb655576db326f34c7b64.bam	7290852	150	2e-05	26397	3710
RK032_C01	LI	184514	88	0.0005	A/T;74|AC/GT;4|C/G;4|CA/TG;3|AT;1|TA;1|GA/TC;1	A/T;0.8409|AC/GT;0.0455|C/G;0.0455|CA/TG;0.0341|AT;0.0114|TA;0.0114|GA/TC;0.0114	1f98f621-ec93-4525-b7f2-4b7a0b45a3d9/4ebc8c1e737968460dc79d6b47ccf48f.bam	0a7742bc-a37a-48bd-8f21-5fcf18da6382/fdf8475123206d1f4d9bebef522b3e60.bam	7214211	163	2e-05	15372	2031
RK033_C01	LI	186953	50	0.0003	A/T;38|C/G;5|CA/TG;3|AT;2|AC/GT;1|TA;1	A/T;0.76|C/G;0.1|CA/TG;0.06|AT;0.04|AC/GT;0.02|TA;0.02	0af6fbd1-2b62-43af-98bf-24f61aa93143/78033b7be303ad5e1529e2d861164cec.bam	d3b8cc2d-039d-4a02-83e6-799898b766f4/f91074da6d0193d1da952230076ce582.bam	7327331	110	2e-05	46613	6068
RK034_C	LI	190903	20	0.0001	A/T;16|CA/TG;3|AC/GT;1	A/T;0.8|CA/TG;0.15|AC/GT;0.05	7a02007e-aa60-4d79-9243-5bc46ec5ea80/a10ae96c165ea32467ef1a46e0d7663e.bam	29fbf588-bf8c-4b67-8d9f-bc8c34f031f2/0d6ea3e2480a3f748ecaf607f43f8415.bam	7210116	45	1e-05	7481	803
RK035_C01	LI	165697	45	0.0003	A/T;39|AC/GT;2|AT;1|TA;1|CA/TG;1|C/G;1	A/T;0.8667|AC/GT;0.0444|AT;0.0222|TA;0.0222|CA/TG;0.0222|C/G;0.0222	46d3900b-a6db-4dda-b6a0-f85c1d6433f4/b289347ff6c578a4f40a222091f27061.bam	cdd68208-e5a7-41ff-ad32-9817301e3ef1/80d5a0760c6e5757e46b1e9e403411d9.bam	6623863	105	2e-05	40058	2793
RK189_C01	LI	174426	120	0.0007	A/T;114|CA/TG;3|C/G;2|AG/CT;1	A/T;0.95|CA/TG;0.025|C/G;0.0167|AG/CT;0.0083	18d11000-272b-4a70-ab73-959cfa36c47e/33e99f198218c1f9c3628ae5191fd42b.bam	6bcba647-5367-46e1-8600-82b072bf800c/1905efac27fa04b4b1be58894aa27c33.bam	6780279	229	3e-05	15546	2225
RK036_C01	LI	193231	35	0.0002	A/T;23|CA/TG;5|AC/GT;3|C/G;2|AT;1|TA;1	A/T;0.6571|CA/TG;0.1429|AC/GT;0.0857|C/G;0.0571|AT;0.0286|TA;0.0286	18d11000-272b-4a70-ab73-959cfa36c47e/33e99f198218c1f9c3628ae5191fd42b.bam	fe02ad40-adba-49b9-bfcc-dbf9aab795fb/491a2e3c66945b3c806afa3f2a5e1bb0.bam	7451236	76	1e-05	8824	1126
RK037_C01	LI	192363	49	0.0003	A/T;41|AT;4|AC/GT;3|GA/TC;1	A/T;0.8367|AT;0.0816|AC/GT;0.0612|GA/TC;0.0204	d87bf009-b61e-4f0d-a1fb-bfd8fc8ec2be/226ba94ed0cbab3a43cb4453e724ba07.bam	90936f7a-32cd-4311-b78c-88b5c0962c03/f48a360e68225dbaadd53e8065d11893.bam	7487726	101	1e-05	7826	1207
RK038_C01	LI	178685	47	0.0003	A/T;42|CA/TG;3|AC/GT;1|C/G;1	A/T;0.8936|CA/TG;0.0638|AC/GT;0.0213|C/G;0.0213	c6b167a5-0a74-488f-b3b9-55b9bf90ffa5/df1f77df4fed0f5c7ff5cf828ee6bf7d.bam	d6c37eaa-0246-4467-8f6c-2a0a826e6bc2/fbab150594cf8a4afc059c8dc17935af.bam	6905099	86	1e-05	10521	1261
RK041_C01	LI	166442	62	0.0004	A/T;50|AC/GT;5|AT;3|C/G;3|CA/TG;1	A/T;0.8065|AC/GT;0.0806|AT;0.0484|C/G;0.0484|CA/TG;0.0161	91c0ad7d-5d03-452d-b7b2-79dcf8394e0b/204ce6c10541bdea51d59ee29a218733.bam	dec2e572-55ad-4329-919f-44794e794356/872e3e2037f5147fefbbad82cb946428.bam	6561733	123	2e-05	25517	1679
RK042_C	LI	190141	82	0.0004	A/T;76|AC/GT;1|TA;1|AAAC/GTTT;1|CA/TG;1|GA/TC;1|C/G;1	A/T;0.9268|AC/GT;0.0122|TA;0.0122|AAAC/GTTT;0.0122|CA/TG;0.0122|GA/TC;0.0122|C/G;0.0122	37ec80f0-11f4-41a7-b074-651b3151ff8a/d997c2af50e97b5f873a3f9b8cfaf101.bam	4aa327aa-c194-48c6-bdbe-9d93b74d60ae/3eaa5ad57b778829907b36ac45baa681.bam	7186736	146	2e-05	11069	1790
RK043_C01	LI	175316	42	0.0002	A/T;35|AC/GT;3|AT;2|TA;1|CA/TG;1	A/T;0.8333|AC/GT;0.0714|AT;0.0476|TA;0.0238|CA/TG;0.0238	1f487eb4-2c57-4bff-b57d-d1b4e424e941/af5bc2222d09007b8d1784d9eaf9694e.bam	59b822bc-a530-45f7-884c-a39c6ddf0584/27d9eeea5f6d5de0604cbd2bf48cfe29.bam	6922112	96	1e-05	15357	1254
RK044_C01	LI	179940	94	0.0005	A/T;90|AC/GT;2|CA/TG;2	A/T;0.9574|AC/GT;0.0213|CA/TG;0.0213	2bd5e80e-0282-497e-81d2-e73e3dab3994/ad09a34ca659e41a2439e850c5952871.bam	fca8c332-e7ab-4756-9959-4b214703586b/1d66c397c85d3f9a359f3b377e368922.bam	6837388	171	3e-05	12201	1629
RK046_C01	LI	185293	55	0.0003	A/T;45|AC/GT;4|TA;2|CA/TG;2|C/G;2	A/T;0.8182|AC/GT;0.0727|TA;0.0364|CA/TG;0.0364|C/G;0.0364	70213902-1df1-4a67-a432-657fc1d9285a/5143f6c4edf5d4d322ea10526ef45bae.bam	5f18bf61-9d62-4d30-ad51-6509e570358a/cc379e1a54fdf28b4d6e41b337bd1b28.bam	6893197	100	1e-05	15039	1658
RK046_C02	LI	184345	103	0.0006	A/T;90|AC/GT;4|CA/TG;4|AT;2|C/G;2|GA/TC;1	A/T;0.8738|AC/GT;0.0388|CA/TG;0.0388|AT;0.0194|C/G;0.0194|GA/TC;0.0097	70213902-1df1-4a67-a432-657fc1d9285a/5143f6c4edf5d4d322ea10526ef45bae.bam	068b7aed-2490-4b4a-b707-cfb53184f2f1/b5ca79f6f23ec11ca47c0eeaa1a5b985.bam	6834135	178	3e-05	15165	1557
RK047_C01	LI	160647	35	0.0002	A/T;27|CA/TG;4|AC/GT;2|TA;1|C/G;1	A/T;0.7714|CA/TG;0.1143|AC/GT;0.0571|TA;0.0286|C/G;0.0286	6b51ba51-e8df-46d4-9348-6596bef66ab6/598a8a346144ade16540d8be9b7a46e7.bam	e9b234fc-4d00-4306-9741-b467c7e7c6c3/87fa59b6981d66bc1d454cc7129df6fe.bam	6553641	67	1e-05	20027	1375
RK048_C	LI	179324	72	0.0004	A/T;59|CA/TG;6|AT;2|C/G;2|AC/GT;1|CAA/TTG;1|TA;1	A/T;0.8194|CA/TG;0.0833|AT;0.0278|C/G;0.0278|AC/GT;0.0139|CAA/TTG;0.0139|TA;0.0139	3d18ba47-b424-41db-bd19-60687f95f89f/bed97cad91208275214a61cf6ca9d9bc.bam	1f5ac362-6dda-411d-90c9-1806ee62328f/873bd70adcbd8b5ad12972a6e3df781f.bam	6840098	155	2e-05	18768	1843
RK049_C01	LI	185118	16	0.0001	A/T;9|AC/GT;3|AT;1|TA;1|CA/TG;1|C/G;1	A/T;0.5625|AC/GT;0.1875|AT;0.0625|TA;0.0625|CA/TG;0.0625|C/G;0.0625	28c7efd3-58ae-420b-b7b4-2c2e2576db88/546134b13d20959e489389fbc67f15b1.bam	8be14eca-e111-4a63-a1c4-5dfd060b6577/2b2e4ed310e5215e33793f7c4dc8d037.bam	7061514	28	0	6298	1535
RK050_C	LI	173345	48	0.0003	A/T;36|CA/TG;7|AT;3|AC/GT;2	A/T;0.75|CA/TG;0.1458|AT;0.0625|AC/GT;0.0417	0ee03db0-2e75-4904-a864-8702fbc90b26/4b96b259d34432dd9dd92606dc599e3c.bam	13d8c4c2-faa2-4649-a646-159a7f9255b3/4d83158f2c915531cf3ab027c52bca7e.bam	6647729	96	1e-05	27127	4094
RK051_C01	LI	186960	71	0.0004	A/T;60|AC/GT;3|TA;2|CA/TG;2|C/G;2|CACAC/GTGTG;1|GA/TC;1	A/T;0.8451|AC/GT;0.0423|TA;0.0282|CA/TG;0.0282|C/G;0.0282|CACAC/GTGTG;0.0141|GA/TC;0.0141	699a0820-31a9-42b3-85e4-6e428649bec8/98317c70f51421e5680243aab20542e0.bam	53d9363b-8929-47bc-b2c3-2de010561df4/00e9c36d0ad263811cbb20d20a930ca8.bam	7289255	153	2e-05	15494	1764
RK052_C01	LI	173324	60	0.0003	A/T;51|AC/GT;5|CA/TG;2|AT;1|C/G;1	A/T;0.85|AC/GT;0.0833|CA/TG;0.0333|AT;0.0167|C/G;0.0167	bdc30d8c-240d-43f7-9ede-8dc2204c745b/b1a3e541b373376ef970865a867a5d89.bam	5a150f44-efd5-4b8d-a526-08aea7815ca2/3f68917256d8464f1dfb44bbc6c2cb93.bam	6909695	123	2e-05	18321	1720
RK054_C01	LI	194804	54	0.0003	A/T;44|AC/GT;3|CA/TG;3|AT;1|TA;1|CATC/GATG;1|C/G;1	A/T;0.8148|AC/GT;0.0556|CA/TG;0.0556|AT;0.0185|TA;0.0185|CATC/GATG;0.0185|C/G;0.0185	80e0fc55-893b-436c-8a76-084549b80d9d/655c983ce94bd17d9df861cd2768640c.bam	05378b8a-f554-4d34-ac18-0621412abed7/3761a5de33c9a3b83449510959aa22cb.bam	7534869	98	1e-05	11641	1262
RK055_C01	LI	188967	15	0.0001	A/T;10|CA/TG;3|AT;1|AC/GT;1	A/T;0.6667|CA/TG;0.2|AT;0.0667|AC/GT;0.0667	2a77e017-dac0-4138-9ae0-0b18f5053aad/eed0c813cfcdb2497f2c294048fbfce8.bam	f347b246-3646-4e63-8383-3563ef920e4d/a961971d7183183270de63991366be94.bam	7393743	25	0	3778	888
RK056_C01	LI	182083	88	0.0005	A/T;81|AC/GT;5|CA/TG;2	A/T;0.9205|AC/GT;0.0568|CA/TG;0.0227	7ade6e43-ba55-4988-ab11-4f8f61bc37b7/255b814d171c88274d2b5de7895717fc.bam	a6773ad9-44af-4763-9967-c50e3fd4f624/725a52a351e9173a47bb31c79116831e.bam	7142703	193	3e-05	22822	2408
RK058_C01	LI	172139	82	0.0005	A/T;75|CA/TG;3|C/G;3|AC/GT;1	A/T;0.9146|CA/TG;0.0366|C/G;0.0366|AC/GT;0.0122	00c98803-b282-4574-b3e9-168fa15e91e0/0f39dfeb2c7917d70a8d15a3ccf1f70a.bam	24b49eb0-baf2-4fcd-9d7e-d40727565600/8803f9425e61768d43c65132d8b2d60a.bam	6584019	135	2e-05	10830	1288
RK063_C	LI	189561	41	0.0002	A/T;34|AT;2|TA;2|CA/TG;2|AC/GT;1	A/T;0.8293|AT;0.0488|TA;0.0488|CA/TG;0.0488|AC/GT;0.0244	1929948c-817d-4ed3-a7ff-d0a03e7a911b/30e896036bf19878cfb01c1b68940181.bam	e560d956-aefc-4066-8c3a-aea4937f5632/845edd22360c738acf72a12248aed969.bam	7062984	73	1e-05	10675	1379
RK065_C01	LI	169151	71	0.0004	A/T;58|AC/GT;6|AT;4|CA/TG;1|C/G;1|AATGG/CCATT;1	A/T;0.8169|AC/GT;0.0845|AT;0.0563|CA/TG;0.0141|C/G;0.0141|AATGG/CCATT;0.0141	448ec10f-1d75-4b49-a37e-58c20c62fd96/c01203cee05c02f59304c8c0f09ceb55.bam	78b4df10-a9b5-4d49-9be4-033f010a87e5/6559869eca3fce04ad1da2315d71bbe4.bam	6805567	146	2e-05	14217	1704
RK066_C01	LI	176809	75	0.0004	A/T;69|C/G;3|AC/GT;1|TA;1|CA/TG;1	A/T;0.92|C/G;0.04|AC/GT;0.0133|TA;0.0133|CA/TG;0.0133	32ead13b-10ae-427f-8022-df4a90b68ddc/0f75d555fc5442c55232ed32eabe3a12.bam	c70b583f-85ce-4185-bf4d-52d6102914eb/d84253d0bb5e6cc5c27fdd9646cfb564.bam	6860508	130	2e-05	10560	1515
RK067_C01	LI	185461	52	0.0003	A/T;45|AT;3|AC/GT;2|CA/TG;1|C/G;1	A/T;0.8654|AT;0.0577|AC/GT;0.0385|CA/TG;0.0192|C/G;0.0192	6c0fea2d-1812-400d-9678-95b43082ed38/383b7af3b357116e061a744d8ac140af.bam	2d550d8f-9764-48ab-ac00-07c4933429b8/83cbebb6565258efee389fedb013cdfb.bam	7057292	105	1e-05	22641	1441
RK068_C	LI	168820	52	0.0003	A/T;44|AC/GT;4|CA/TG;3|TA;1	A/T;0.8462|AC/GT;0.0769|CA/TG;0.0577|TA;0.0192	b0d5e6bf-8f8a-47f4-8d53-2850d654b5be/3cc38f808752f3159c46d62986d0001a.bam	c56fea7a-8024-456f-b47b-091a0b3c33c8/ca3b3edaef8df7eb4e955d9a91ddfb4d.bam	6549454	80	1e-05	6869	3358
RK073_C01	LI	182123	15	0.0001	CA/TG;7|A/T;5|AC/GT;2|AT;1	CA/TG;0.4667|A/T;0.3333|AC/GT;0.1333|AT;0.0667	b565a952-563d-46cd-a0c3-18fba579208d/82348b7875cc73f1459d2faa5ac71ae6.bam	50542e51-540a-4abb-a7a8-fe50169b7d81/f1ee58112806f98531adaace21224beb.bam	7175713	20	0	3363	738
RK075_C01	LI	188141	54	0.0003	A/T;42|AT;3|CA/TG;3|C/G;3|AC/GT;2|TA;1	A/T;0.7778|AT;0.0556|CA/TG;0.0556|C/G;0.0556|AC/GT;0.037|TA;0.0185	6ef3d5db-a1a5-4418-a3c4-3b6bcf4bff5f/7d5c341716dc65e643f9add800f1a969.bam	c7d612be-072d-44eb-88a5-7c402379ec66/58e99398186fa3e1de23fd086c2720e7.bam	7272031	104	1e-05	15403	1118
RK079_C01	LI	183362	89	0.0005	A/T;83|AC/GT;3|C/G;2|CA/TG;1	A/T;0.9326|AC/GT;0.0337|C/G;0.0225|CA/TG;0.0112	c58c7e3f-2379-412d-89a0-8d31618e2f18/adabba3222f8f8f888553e2ce6bd96fc.bam	f65bf04f-3057-4634-b68b-5fee604f263d/05583800119914748b9079e50ee7bf47.bam	7148571	158	2e-05	16560	1690
RK080_C01	LI	179516	68	0.0004	A/T;62|CA/TG;3|AC/GT;2|TA;1	A/T;0.9118|CA/TG;0.0441|AC/GT;0.0294|TA;0.0147	c25e7517-f32a-439c-a89d-388d0a523f49/ac9b38c907214332c2a4b028c2d795be.bam	bb214aad-cd7b-4d1f-b312-d6a87c836f6d/43c82bf35cb5d3a8d72dd8724538e795.bam	6999829	148	2e-05	18522	1807
RK082_C01	LI	160870	38	0.0002	A/T;29|AC/GT;3|TA;2|CA/TG;2|AT;1|C/G;1	A/T;0.7632|AC/GT;0.0789|TA;0.0526|CA/TG;0.0526|AT;0.0263|C/G;0.0263	fbf4b1a7-7446-41dd-aea8-54bbb9489de2/e86975355ae37e2f4af33efa2cb87c6d.bam	8232b0d5-e7f3-484a-a5c4-c152e731e427/60f6fb73f6509495d29350064a48924f.bam	6527376	76	1e-05	14817	1237
RK083_C01	LI	192038	73	0.0004	A/T;59|CA/TG;5|AC/GT;3|C/G;3|AT;2|TA;1	A/T;0.8082|CA/TG;0.0685|AC/GT;0.0411|C/G;0.0411|AT;0.0274|TA;0.0137	707a6dbe-ec86-4e76-9d52-5f308004e9af/c43a0cb2de07a1ebb304f7ebc7635d7e.bam	d9e3840c-7404-43a5-8a4f-c7dca167f2d4/5258ec3f782ebfb81daeae91bd93cc1e.bam	7473108	149	2e-05	17660	1742
RK084_C01	LI	163420	39	0.0002	A/T;28|AC/GT;3|C/G;3|TA;2|CA/TG;2|AT;1	A/T;0.7179|AC/GT;0.0769|C/G;0.0769|TA;0.0513|CA/TG;0.0513|AT;0.0256	c2d6500c-995d-42a8-b347-65ba1d26ec05/df2c7b73c6d5c9903b2f37994f2883d5.bam	f0fcacf2-bcdd-4dbc-8732-72bf658fc3cc/0962216408b0c663ce83b6ed19ef322c.bam	6512106	86	1e-05	13374	1311
RK085_C01	LI	174916	76	0.0004	A/T;64|C/G;4|AC/GT;3|AT;3|CA/TG;2	A/T;0.8421|C/G;0.0526|AC/GT;0.0395|AT;0.0395|CA/TG;0.0263	4736ff2f-7a94-4663-b6b7-1d27796908a9/55aa07d03f6a497af1f0fb36909ae9c3.bam	9bee198d-007f-4f49-8989-590870cf280a/ae1ae5ea0593207ed9bd649a369bca8d.bam	6674591	133	2e-05	19927	1561
RK086_C01	LI	168997	80	0.0005	A/T;72|AC/GT;3|TA;2|CA/TG;2|C/G;1	A/T;0.9|AC/GT;0.0375|TA;0.025|CA/TG;0.025|C/G;0.0125	c2cf2e82-2e94-4d60-9f83-390c901948ee/dd84bffdd97240312f0906c186d702ee.bam	89f1262a-48f6-48f1-9db0-cc2bc0b747d4/469acf910d4582d87590b2c9b0428c8b.bam	6628841	144	2e-05	19524	2015
RK087_C01	LI	162867	22	0.0001	A/T;17|CA/TG;2|AC/GT;1|AG/CT;1|C/G;1	A/T;0.7727|CA/TG;0.0909|AC/GT;0.0455|AG/CT;0.0455|C/G;0.0455	67467784-5166-4602-982b-5791beafc419/b08f6bc5c1c9f82f364e4e3d7d12390e.bam	284189b6-c457-478b-96f4-12067cfb3217/aa2cf92ea36e841d4a6e581487d7ba35.bam	6520420	51	1e-05	11031	904
RK092_C01	LI	169459	59	0.0003	A/T;49|CA/TG;4|AC/GT;3|AT;1|AG/CT;1|C/G;1	A/T;0.8305|CA/TG;0.0678|AC/GT;0.0508|AT;0.0169|AG/CT;0.0169|C/G;0.0169	f6b04f9c-87ed-44a8-96a3-1db9921cc052/0a1eac3f58318a7c41cf95bce1321bab.bam	5e5d3a88-2f1e-4972-a393-912fa174dad3/b9d3375696e9042faae5edeab974821a.bam	6515277	116	2e-05	15987	1868
RK098_C01	LI	146191	59	0.0004	A/T;49|AC/GT;3|CA/TG;3|C/G;3|AT;1	A/T;0.8305|AC/GT;0.0508|CA/TG;0.0508|C/G;0.0508|AT;0.0169	e6504295-6097-44e8-978d-21e1f76052db/ff5f4d8f2b93118c8233ea7c14ca84fe.bam	08313577-e5e9-406b-b51d-9e256cced46c/89babea52b71b20f3cfd9921a55ddefb.bam	6014725	99	2e-05	24903	3422
RK099_C01	LI	156690	53	0.0003	A/T;40|AT;3|TA;3|CA/TG;3|AC/GT;2|AG/CT;1|GA/TC;1	A/T;0.7547|AT;0.0566|TA;0.0566|CA/TG;0.0566|AC/GT;0.0377|AG/CT;0.0189|GA/TC;0.0189	d9be3103-7da2-434a-8f75-af072319be1c/39e8cffaf282e115252621d526777510.bam	52281d93-17f9-4da0-b7c7-703891ec0a13/c22e9a9f76be4fd90d736b12256ee5d3.bam	6363598	101	2e-05	12453	1512
RK102_C01	LI	151934	48	0.0003	A/T;37|CA/TG;5|AC/GT;4|TA;1|C/G;1	A/T;0.7708|CA/TG;0.1042|AC/GT;0.0833|TA;0.0208|C/G;0.0208	af0bef8f-bca4-4594-b864-436f879b5246/1932a93c1387a1ecc68ba89500409e25.bam	6a1f36c6-e398-49c3-9655-cd83f425f5c6/98f7996cd34f4b6c8a494dd5943cb754.bam	6430734	83	1e-05	9605	1765
RK106_C01	LI	183698	37	0.0002	A/T;29|AT;2|AC/GT;2|CA/TG;2|C/G;1|AAC/GTT;1	A/T;0.7838|AT;0.0541|AC/GT;0.0541|CA/TG;0.0541|C/G;0.027|AAC/GTT;0.027	83e68ffc-5010-4302-adee-eea615c8e003/55768da259193328f2b4cd7ea8f307f4.bam	f0717d06-511c-4ea6-892d-9a0305da9b20/d576337680594cd3408f1668318f2075.bam	7218929	101	1e-05	21046	1338
RK107_C01	LI	187570	69	0.0004	A/T;58|AC/GT;5|TA;2|C/G;2|AG/CT;1|CA/TG;1	A/T;0.8406|AC/GT;0.0725|TA;0.029|C/G;0.029|AG/CT;0.0145|CA/TG;0.0145	ed42ef7a-f969-4c48-9c18-9271d19b7b9b/6f5a53586252db029fc92208ae38cea4.bam	40f53145-e702-4703-aea0-109dd1e32031/3ceafb53355fbc0fd92748ca1fd2ca04.bam	7357943	120	2e-05	15029	1396
RK109_C01	LI	148505	21	0.0001	A/T;12|AC/GT;3|CA/TG;3|AT;1|TA;1|CATC/GATG;1	A/T;0.5714|AC/GT;0.1429|CA/TG;0.1429|AT;0.0476|TA;0.0476|CATC/GATG;0.0476	f0f7f376-8c5d-4af9-b627-c1a5d6b6cdbb/e0b992d6bec14ef4b4ba4b7f07370a11.bam	b2f387ff-d7e7-4fc3-accc-2482db010efc/806db5073d623abfb8cf866664309404.bam	6091153	48	1e-05	11181	1326
RK111_C01	LI	179100	63	0.0004	A/T;54|CA/TG;4|AC/GT;2|C/G;2|AT;1	A/T;0.8571|CA/TG;0.0635|AC/GT;0.0317|C/G;0.0317|AT;0.0159	106ab72e-129f-4b72-90fb-091bf5cd2640/819c195bed072c9b84d00f6fb23f3c75.bam	aa8800ee-f0ea-4d8d-b57a-b058f4013099/13f6034648d31da39bd8855d39d1db00.bam	6964811	121	2e-05	16405	1641
RK113_C01	LI	194644	11	0.0001	A/T;4|CA/TG;3|AC/GT;2|AT;1|C/G;1	A/T;0.3636|CA/TG;0.2727|AC/GT;0.1818|AT;0.0909|C/G;0.0909	84f1371e-8d0b-4c27-aa31-2a37a2e285e2/d46a41557bad211fda2dba5879363b29.bam	4c69f283-6c7f-4f1b-992b-6f00f87e22db/375613e936b7fe77d56f09bd4625b674.bam	7452646	16	0	3170	770
RK119_C01	LI	161142	12507	0.0776	A/T;12095|C/G;185|CA/TG;54|AC/GT;53|AG/CT;38|AT;31|GA/TC;31|TA;17|AAAC/GTTT;1|AACAA/TTGTT;1	A/T;0.9671|C/G;0.0148|CA/TG;0.0043|AC/GT;0.0042|AG/CT;0.003|AT;0.0025|GA/TC;0.0025|TA;0.0014|AAAC/GTTT;0.0001|AACAA/TTGTT;0.0001	0b983aeb-2bd2-4668-a919-86d2f60f794f/2f7b69f7d62f63a3ea4e438ff39e7c8c.bam	c34c0d55-c587-455e-b65a-98ae1d26d59d/31aceb60211819d7b4e30e21ab38db91.bam	6368197	17377	0.00273	51486	77167
RK135_C01	LI	169139	52	0.0003	A/T;41|AC/GT;5|AT;2|CA/TG;2|AG/CT;1|C/G;1	A/T;0.7885|AC/GT;0.0962|AT;0.0385|CA/TG;0.0385|AG/CT;0.0192|C/G;0.0192	3d7d0512-176d-4a89-80c2-c1b4c269c5d4/1ddf92c6501d1ddda592d35ce98717b8.bam	2f393ad7-fbfb-498e-a6d6-8ca0b3b5f6ae/f6140af682e752c22d0c8727e366b55d.bam	6967757	116	2e-05	20760	1554
RK136_C01	LI	187918	39	0.0002	A/T;29|AC/GT;6|C/G;3|CA/TG;1	A/T;0.7436|AC/GT;0.1538|C/G;0.0769|CA/TG;0.0256	f806eb6f-ae0b-4620-bf88-6e3a4fcd04a8/76befafa825e445c4d094f3fc9b4df0d.bam	3551eb8d-999c-44f6-ba46-00d8e9b810ae/9dc82af243029312d10bf9923b1ea575.bam	7128554	86	1e-05	15075	1359
RK137_C01	LI	173201	58	0.0003	A/T;47|AC/GT;3|CA/TG;3|TA;1|GA/TC;1|C/G;1|AAC/GTT;1|AATGG/CCATT;1	A/T;0.8103|AC/GT;0.0517|CA/TG;0.0517|TA;0.0172|GA/TC;0.0172|C/G;0.0172|AAC/GTT;0.0172|AATGG/CCATT;0.0172	96c19f82-a1d9-4a9a-9af3-95d82118b8e2/4619b1fb55feca952f33c91589507fa9.bam	eaaf0c10-6df2-4aa3-9fc5-643511883ef9/53920d82ba35ac800f7c94ec28331017.bam	6827266	96	1e-05	11936	1355
RK140_C01	LI	194574	38	0.0002	A/T;31|AC/GT;2|AT;2|TA;2|CA/TG;1	A/T;0.8158|AC/GT;0.0526|AT;0.0526|TA;0.0526|CA/TG;0.0263	d9d41048-a230-4841-9c9c-93daf9fff5aa/9db032a6367df44026c41fc5b45caace.bam	46b7c021-6961-4936-b59d-4caf44a83be2/86bbdea3f47a4a14ab23d12f68af587f.bam	7510230	99	1e-05	16377	1348
RK145_C01	LI	180893	46	0.0003	A/T;37|AT;3|CA/TG;3|AC/GT;2|AG/CT;1	A/T;0.8043|AT;0.0652|CA/TG;0.0652|AC/GT;0.0435|AG/CT;0.0217	11f2d8c3-70a4-46d8-90ea-6bbd6e137cad/019fc1e0c930bc0579f07532b8245c9f.bam	5c9df82d-0d68-43ba-aa64-938ed2786fcd/766807534c34aa5ffd69cdd907bc335f.bam	7136182	112	2e-05	15470	1131
RK281_C01	LI	176169	56	0.0003	A/T;52|AC/GT;2|AG/CT;1|CA/TG;1	A/T;0.9286|AC/GT;0.0357|AG/CT;0.0179|CA/TG;0.0179	11f2d8c3-70a4-46d8-90ea-6bbd6e137cad/019fc1e0c930bc0579f07532b8245c9f.bam	9dd954e9-bf0d-44b9-9943-57bad50e0424/a17af0b8b641586d16bcdddfbd9f494c.bam	6945597	127	2e-05	20268	1339
RK148_C01	LI	151159	46	0.0003	A/T;40|AT;3|AC/GT;2|CA/TG;1	A/T;0.8696|AT;0.0652|AC/GT;0.0435|CA/TG;0.0217	0a976aa9-fc5d-442b-9246-c4fafb71f837/15fa9f36d07d124c89545ee8f1bd0453.bam	110f55ca-1bb4-4c38-984f-6bfb23e23f61/2d6c73aacc7cd76aad11c5caa1e2779d.bam	6196455	91	1e-05	8928	1296
RK150_C01	LI	184234	46	0.0002	A/T;41|CA/TG;3|AC/GT;1|C/G;1	A/T;0.8913|CA/TG;0.0652|AC/GT;0.0217|C/G;0.0217	b4868419-89be-4842-b799-2b9bfe5a0d42/00b80a7bc050ea75901374274dd121b3.bam	44ebb4b7-cdc7-4bf9-9749-995eae5450af/efaa63df12212ce97c6f0a3f721d1681.bam	7369671	101	1e-05	22370	2356
RK151_C01	LI	168218	87	0.0005	A/T;75|AC/GT;4|AT;3|CA/TG;3|AG/CT;1|C/G;1	A/T;0.8621|AC/GT;0.046|AT;0.0345|CA/TG;0.0345|AG/CT;0.0115|C/G;0.0115	b59b3820-f8b3-4a3a-9bfa-61b851341fe7/74021edcc8033d4cedd78b03ebedc0a6.bam	d4926d38-908e-42b1-a7a4-c9613c084383/64ddea05a2bee49e4a139db4f7ea226f.bam	6643637	154	2e-05	22992	2135
RK155_C01	LI	149263	53	0.0004	A/T;45|CA/TG;5|AC/GT;1|TA;1|C/G;1	A/T;0.8491|CA/TG;0.0943|AC/GT;0.0189|TA;0.0189|C/G;0.0189	28b9ec17-9f40-4f54-a527-4deae4021c19/db9d772e96e5adb0457c6f370d03426f.bam	6eb4aceb-dcb5-46a4-ac81-a3bc52fddd3d/45ced80f49b14aad071a6ae2df9fa9a6.bam	6004697	105	2e-05	14435	1723
RK156_C01	LI	177293	61	0.0003	A/T;51|AC/GT;6|AT;1|TA;1|CA/TG;1|C/G;1	A/T;0.8361|AC/GT;0.0984|AT;0.0164|TA;0.0164|CA/TG;0.0164|C/G;0.0164	d58c1d18-041e-4708-9315-7cb4f85ba7d7/a4699bc24690d916595acd48c616dabe.bam	9fe3821a-0bb6-49ae-9925-94b303339072/5705a1c3d47986c3058a842f5fda4be2.bam	6928829	124	2e-05	14143	1417
RK157_C01	LI	173008	37	0.0002	A/T;32|C/G;2|AT;1|AG/CT;1|GA/TC;1	A/T;0.8649|C/G;0.0541|AT;0.027|AG/CT;0.027|GA/TC;0.027	c80ea712-f2c3-420e-9a5c-ec3bca843f19/a121615f52dee6678a559af8e60c0c5d.bam	07900206-f8b1-41d7-98f5-e12a06618f07/74aab6f6a3b33c3a42001cf9948ee6db.bam	6827603	69	1e-05	9216	1520
RK159_C01	LI	185358	56	0.0003	A/T;48|CA/TG;5|TA;1|GA/TC;1|C/G;1	A/T;0.8571|CA/TG;0.0893|TA;0.0179|GA/TC;0.0179|C/G;0.0179	97f82640-9238-4f0d-bca6-d170730d78bc/6549d2179bc314cd73df6cfb60dffc2c.bam	5db9dc68-334e-4f63-9316-4e8fcae25390/792cad237dc07283adb7920e1ffd874d.bam	7264582	115	2e-05	20682	1644
RK166_C01	LI	176536	71	0.0004	A/T;64|CA/TG;4|C/G;3	A/T;0.9014|CA/TG;0.0563|C/G;0.0423	e4831ced-92a0-4240-8409-91308d35a8dc/84f8e7fe20326279de68569a36d2ad7c.bam	469e575a-fb3b-4c28-ac43-4442350661eb/840d0a76742a7084e5d79b21ffda7926.bam	6778732	139	2e-05	11485	1662
RK167_C01	LI	190954	114	0.0006	A/T;100|CA/TG;6|C/G;5|AC/GT;2|AG/CT;1	A/T;0.8772|CA/TG;0.0526|C/G;0.0439|AC/GT;0.0175|AG/CT;0.0088	83f4e934-f23f-49f4-b74f-8dbb60700ff8/04eac9deaa63b0489f03c0934ee17a7f.bam	1fce3bc9-e7dc-4b96-a4cc-1ca0f3e3d08a/a66f168e0b3091298a4a187cff02a5d8.bam	7271929	188	3e-05	14836	1672
RK169_C01	LI	196673	54	0.0003	A/T;44|AC/GT;4|AT;2|CA/TG;2|C/G;2	A/T;0.8148|AC/GT;0.0741|AT;0.037|CA/TG;0.037|C/G;0.037	04f90491-0fd5-43c9-9045-d60f274f5766/bb89951261428b54fd0478c4e7f4ceed.bam	9cab4384-168c-482a-840d-78eb42c9a2d6/359f4fff9552c1146709bb377eac62fd.bam	7563041	121	2e-05	25307	2269
RK170_C01	LI	170243	111	0.0007	A/T;103|C/G;2|AT;1|AC/GT;1|TA;1|AAAC/GTTT;1|CA/TG;1|GA/TC;1	A/T;0.9279|C/G;0.018|AT;0.009|AC/GT;0.009|TA;0.009|AAAC/GTTT;0.009|CA/TG;0.009|GA/TC;0.009	cf7e7cfb-df10-4ff5-9dde-21b4313b0b83/bfc989d1fe9affbb7233426829455214.bam	997b0adc-7c70-4b9e-8c36-a9fe83fbd7fe/bdb29502f2110989a59a385d62809b55.bam	6760329	209	3e-05	21272	2030
RK171_C01	LI	181765	38	0.0002	A/T;31|CA/TG;4|AC/GT;1|TA;1|C/G;1	A/T;0.8158|CA/TG;0.1053|AC/GT;0.0263|TA;0.0263|C/G;0.0263	3aac58a4-b468-4199-bc52-bdb79bc30f70/33f0509f52f1c8b0ea137dafd5fcdcbc.bam	8dfc9ddc-6bd9-4f08-b55a-8c7ba66df9d1/9d6cce73231ede00ae6e03834cfcc7cc.bam	7126481	59	1e-05	7845	1117
RK172_C01	LI	168273	41	0.0002	A/T;35|CA/TG;4|AC/GT;1|AT;1	A/T;0.8537|CA/TG;0.0976|AC/GT;0.0244|AT;0.0244	b29a62a1-9495-453d-be87-9663fff9dcf9/7976956689488f39d5e38b5043787eda.bam	3c02087d-77fe-43f3-b501-0849582107ad/a03863e837cbd7e183cc08923d0d2a3d.bam	6623869	79	1e-05	9506	1297
RK175_C01	LI	185340	58	0.0003	A/T;51|C/G;6|AT;1	A/T;0.8793|C/G;0.1034|AT;0.0172	7fb7f7c1-b6e2-4984-8b7c-a5002b1ec70c/1ddf1b0c325527318767571b8b076e13.bam	1a6eb0e6-fc4c-4a56-ac12-d5fe1709fac6/6abba3f621d5442ad1e893d1ea11e9c6.bam	7092646	115	2e-05	19669	1610
RK176_C01	LI	184523	37	0.0002	A/T;32|CA/TG;5	A/T;0.8649|CA/TG;0.1351	3bc968c2-6478-4e07-872c-467fba37b9de/08579cbf766d4618ca1f9965bc43f56c.bam	4d09c80b-56f1-47c7-8754-4cfcca9459c3/b7654a3588bc98f7302155eaae9345f3.bam	7222346	101	1e-05	11027	1255
RK177_C01	LI	193048	76	0.0004	A/T;60|AC/GT;6|CA/TG;4|TA;3|AT;2|C/G;1	A/T;0.7895|AC/GT;0.0789|CA/TG;0.0526|TA;0.0395|AT;0.0263|C/G;0.0132	21384236-60bc-471a-a5a8-14905665a2e8/01efa9d647975a71127865cdda4db63a.bam	ff803313-7337-4ecf-b693-f68d1759c65d/237ae7a95ec8f7313ef1bb9652326070.bam	7343153	121	2e-05	15297	1447
RK178_C01	LI	183757	50	0.0003	A/T;43|CA/TG;3|AG/CT;2|AC/GT;1|AT;1	A/T;0.86|CA/TG;0.06|AG/CT;0.04|AC/GT;0.02|AT;0.02	c2e6cccf-a58a-4461-90f1-6af13967e2f0/60a440dce04b42401dbdc42956a4c72b.bam	8bd1456d-e740-4035-a22a-1b94a6ee9549/4b490e803087576bf225903cc610c441.bam	7061412	113	2e-05	10751	1357
RK179_C01	LI	177747	12	0.0001	A/T;7|AC/GT;2|CA/TG;2|AT;1	A/T;0.5833|AC/GT;0.1667|CA/TG;0.1667|AT;0.0833	f648ffd1-ccd2-4aad-adc3-4a415e01dc87/b9d4698264567a165a47029032d3cf2d.bam	4795ec09-27a4-4f72-934b-6b2e832bc1e2/55e968ac5db2e3707239b8987701fe49.bam	6845434	16	0	5757	661
RK180_C02	LI	169209	22	0.0001	A/T;13|AC/GT;3|AT;2|CA/TG;2|TA;1|AAC/GTT;1	A/T;0.5909|AC/GT;0.1364|AT;0.0909|CA/TG;0.0909|TA;0.0455|AAC/GTT;0.0455	bcea87b2-db34-4746-818f-4d24cee4f068/ab7f199de8355098bdf06a82ca4d1f9e.bam	26634e1e-df37-4f7b-a8b7-659f5d7019cb/6e4d0bff989842f484f8bfc4c383ebbf.bam	6885986	38	1e-05	11140	1106
RK180_C01	LI	159586	42	0.0003	A/T;36|CA/TG;4|TA;1|C/G;1	A/T;0.8571|CA/TG;0.0952|TA;0.0238|C/G;0.0238	bcea87b2-db34-4746-818f-4d24cee4f068/ab7f199de8355098bdf06a82ca4d1f9e.bam	6b76fe44-6be1-46fe-bf4c-dc9e9443dbae/fd9bececebc47d975c7fef7de999aac8.bam	6613473	94	1e-05	14186	1012
RK181_C01	LI	186416	129	0.0007	A/T;114|CA/TG;5|C/G;5|AC/GT;3|AT;1|AG/CT;1	A/T;0.8837|CA/TG;0.0388|C/G;0.0388|AC/GT;0.0233|AT;0.0078|AG/CT;0.0078	fc73bfa9-2f59-4323-b49d-e5886ae71fa2/b45aa152bd529629d0ad161e1a83f9c7.bam	c0511989-7838-4cfc-914b-47643ef676dd/af97680b3c7d30247f2967d2ac72dbe5.bam	7086069	233	3e-05	22990	1818
RK183_C01	LI	173858	82	0.0005	A/T;74|AC/GT;4|CA/TG;2|TA;1|C/G;1	A/T;0.9024|AC/GT;0.0488|CA/TG;0.0244|TA;0.0122|C/G;0.0122	d0fd2b68-5cd6-436d-aaff-c6e782f70536/4223a8f661f4cd9d15f1a2b3ffd066e9.bam	ba2bfd33-eb6f-43ff-b34a-9af1b73288bf/e37c736ebb1e8e18c620b603817c8284.bam	6694063	148	2e-05	13900	1610
RK184_C01	LI	187921	57	0.0003	A/T;49|CA/TG;5|C/G;2|TA;1	A/T;0.8596|CA/TG;0.0877|C/G;0.0351|TA;0.0175	d771cef2-18b3-47b0-8862-0b301910c6a7/3ea46be9fda6df4253907969cea7d5ce.bam	9e7b2eb2-03b8-40f9-b07d-33cb5ba54ec1/c46dd226d9b4260e23ddb8d63781fd3c.bam	7204485	118	2e-05	15520	1372
RK185_C01	LI	172056	36	0.0002	A/T;28|CA/TG;3|C/G;3|AC/GT;1|AT;1	A/T;0.7778|CA/TG;0.0833|C/G;0.0833|AC/GT;0.0278|AT;0.0278	534309da-6d84-46cd-bcaa-dd81ac1950b3/6fcfe1ab8364564bcaaa0c2e5634f5b0.bam	936ff3a8-7590-4db9-a851-5d06f06830cb/a76aa4632601f4929b2406aeda6434b9.bam	6898007	77	1e-05	7560	1117
RK186_C01	LI	181950	96	0.0005	A/T;79|C/G;7|AC/GT;5|CA/TG;3|AT;2	A/T;0.8229|C/G;0.0729|AC/GT;0.0521|CA/TG;0.0313|AT;0.0208	e7bb4155-3f15-45ec-b8ae-67297fc19e02/b276d9c8eb872102d0dac91dba1a6641.bam	52b73082-9c9f-4861-8a11-406dcc1c1c77/0360d0857a2df64b62d50c2a5bd7391d.bam	7149303	169	2e-05	10297	1408
RK188_C01	LI	189089	13	0.0001	A/T;7|AC/GT;3|CA/TG;2|AT;1	A/T;0.5385|AC/GT;0.2308|CA/TG;0.1538|AT;0.0769	14dae9a9-6e03-434e-9918-2eec505345e3/a66ea9954a49a99cb638b2acff28d17d.bam	4cc2b319-86f4-4546-b478-2abad2439797/2a15b895377694539b8fb1df59833af4.bam	7395246	17	0	7605	1060
RK190_C01	LI	170511	67	0.0004	A/T;57|CA/TG;5|AC/GT;2|C/G;2|GA/TC;1	A/T;0.8507|CA/TG;0.0746|AC/GT;0.0299|C/G;0.0299|GA/TC;0.0149	850b7ed8-2b16-41e8-98c8-63f6da7d24c9/9e5e0f3cd67fc2e6298150b1f0f426a8.bam	c0c3b0b1-b469-457f-9618-102f2c28e49a/24553ea58b132575d9b704959a351cff.bam	6658902	157	2e-05	35696	2717
RK191_C01	LI	168454	37	0.0002	A/T;22|CA/TG;7|AC/GT;5|GA/TC;2|AG/CT;1	A/T;0.5946|CA/TG;0.1892|AC/GT;0.1351|GA/TC;0.0541|AG/CT;0.027	fd64d766-1dd9-4b07-8334-88db5b6f7327/cadeb31de91152a40094d9a54517c350.bam	ac9830dc-fb51-4b5f-8252-24dda59e3275/ed35f24c42a93207582a6bba2f02aba6.bam	6895726	70	1e-05	6600	1071
RK193_C01	LI	171807	68	0.0004	A/T;56|CA/TG;5|AC/GT;3|C/G;2|AT;1|GA/TC;1	A/T;0.8235|CA/TG;0.0735|AC/GT;0.0441|C/G;0.0294|AT;0.0147|GA/TC;0.0147	dafc8adc-c0c1-49d5-b807-162b80ff611c/3fbaf42ffa8af5a49f81f16857f9dd98.bam	dafc4e27-b513-43d9-bdc6-1c36d9f4990d/631b9975333570d974c869406889eea8.bam	6726828	126	2e-05	17276	1775
RK194_C01	LI	192999	38	0.0002	A/T;31|AC/GT;2|C/G;2|AT;1|TA;1|CA/TG;1	A/T;0.8158|AC/GT;0.0526|C/G;0.0526|AT;0.0263|TA;0.0263|CA/TG;0.0263	aa2ccd2f-ef66-4331-811b-6fb24e12bd6a/9894cf0e869698fcefc11753d6a86bc7.bam	0c081309-be64-4e1c-bc98-a8188390583f/de685a5c1fa9c283ccdaee62d47a9a66.bam	7410968	72	1e-05	5243	876
RK196_C01	LI	162751	35	0.0002	A/T;23|CA/TG;5|AC/GT;4|AT;1|TA;1|C/G;1	A/T;0.6571|CA/TG;0.1429|AC/GT;0.1143|AT;0.0286|TA;0.0286|C/G;0.0286	08eee4a6-eb65-416b-b14f-2733039fbae9/042c60f5912bab2ef8db43ab38ecfec0.bam	49f140f6-266f-49b9-9bf3-bf968d515fa1/c01c07b0d204c9438bf0d75743a97b40.bam	6722080	64	1e-05	6201	672
RK197_C01	LI	188712	72	0.0004	A/T;60|C/G;6|CA/TG;3|AC/GT;2|AG/CT;1	A/T;0.8333|C/G;0.0833|CA/TG;0.0417|AC/GT;0.0278|AG/CT;0.0139	8b2aa027-7c79-4c8a-97da-58de1e8139d9/953785e2341396f9fb4d328fa6ae6698.bam	82d5e3d5-4c51-4679-9ca0-7848887825e1/c0380a3a4b84c275f9d482daeb7868ec.bam	7290889	142	2e-05	10693	1361
RK198_C01	LI	179990	27	0.0002	A/T;21|AC/GT;3|CA/TG;2|GA/TC;1	A/T;0.7778|AC/GT;0.1111|CA/TG;0.0741|GA/TC;0.037	a3c68ec4-a561-4761-9a46-bc1704bafdae/c64254438cb94ccfc48e87d5a79e7c68.bam	83c20b95-bb59-4b86-a67c-b3daa25520ec/85b01a3f26054fbde17f8e0a5761c2e3.bam	7049819	41	1e-05	9033	616
RK199_C01	LI	178728	64	0.0004	A/T;56|AT;2|AC/GT;2|TA;2|CA/TG;1|C/G;1	A/T;0.875|AT;0.0313|AC/GT;0.0313|TA;0.0313|CA/TG;0.0156|C/G;0.0156	c4c7310c-62c8-4a43-a3d0-1c8acfb39782/ccba4b34a6c1af52e5929940a75c7fd8.bam	dc1c187f-2f08-49ce-b9c3-980522523816/2d1b0cf4192f61800a4d43884fc68b4e.bam	6817021	122	2e-05	19236	1861
RK200_C01	LI	169313	106	0.0006	A/T;96|AT;4|CA/TG;3|GA/TC;2|C/G;1	A/T;0.9057|AT;0.0377|CA/TG;0.0283|GA/TC;0.0189|C/G;0.0094	4c133ff7-6155-45ee-8d52-fb93ab2fb91c/d0ce4ab2b52e111a2f398dca9abfa4a3.bam	f58a9b42-1289-4351-a93a-49742265582b/8244cf64cacad36d7a5270a53c1deeab.bam	6529600	223	3e-05	25451	2159
RK201_C01	LI	183120	31	0.0002	A/T;23|AC/GT;4|CA/TG;3|TA;1	A/T;0.7419|AC/GT;0.129|CA/TG;0.0968|TA;0.0323	7af731cc-3f0f-4831-91e1-8a7150a3628a/fe7606b8c5ddfdcbc40e356da843bdb6.bam	7b82ca4f-f5b1-47a0-993b-7ed59c8e1542/eebbc03498b9d661b75249722a23f2a5.bam	7162243	79	1e-05	13762	1350
RK209_C01	LI	184178	71	0.0004	A/T;64|CA/TG;4|C/G;2|AC/GT;1	A/T;0.9014|CA/TG;0.0563|C/G;0.0282|AC/GT;0.0141	7fb813a3-b784-4aa4-ad24-cc2f65b032e9/9d9464cf9e4d3d93f7670d79d1fe9d5c.bam	80297697-248c-40ad-a38a-5b08e5369ca2/779d155d63ef5c00f34771e1c703511c.bam	6974165	142	2e-05	18150	1631
RK204_C02	LI	162628	31	0.0002	A/T;21|CA/TG;3|AT;2|AC/GT;2|C/G;2|TA;1	A/T;0.6774|CA/TG;0.0968|AT;0.0645|AC/GT;0.0645|C/G;0.0645|TA;0.0323	7fb813a3-b784-4aa4-ad24-cc2f65b032e9/9d9464cf9e4d3d93f7670d79d1fe9d5c.bam	ea02615d-4021-41a9-a29c-55209046e78c/5784681d178230c5951f6efc31a87fcf.bam	6249718	56	1e-05	9906	1279
RK206_C01	LI	169890	11	0.0001	A/T;7|CA/TG;3|AC/GT;1	A/T;0.6364|CA/TG;0.2727|AC/GT;0.0909	c32a1e4c-74fd-4959-9cb6-c2410bfc9b83/b3872cf9f5f0520719f6b962d2344c7f.bam	1d947763-3ce7-47a9-a8cc-fa6f0ef292fb/75b6eb87614f1dd3a6e5cd651f5d109c.bam	6575298	13	0	28218	6549
RK207_C01	LI	194936	87	0.0004	A/T;79|AT;2|AC/GT;2|TA;1|CA/TG;1|GA/TC;1|C/G;1	A/T;0.908|AT;0.023|AC/GT;0.023|TA;0.0115|CA/TG;0.0115|GA/TC;0.0115|C/G;0.0115	0fd46e9e-235f-4f3f-8d18-9e2730f8cbf0/111cadbe314337e7f1ab3c21c52e9813.bam	57d609ed-2ec4-4ce6-a71e-f83b980cf61d/397fed4711ede7c7ddbc11396b74174d.bam	7523998	185	2e-05	16435	1730
RK210_C01	LI	190864	103	0.0005	A/T;88|AC/GT;5|C/G;5|CA/TG;3|AT;1|TA;1	A/T;0.8544|AC/GT;0.0485|C/G;0.0485|CA/TG;0.0291|AT;0.0097|TA;0.0097	1ceae02a-2cc6-4937-8755-14dd7aa5ccab/ca4410e74a7bd82627766a57f873318d.bam	8384eb68-54d4-43f7-a411-b9a4b80b887f/64bc239132f8930cfc7af9034fe6b6fe.bam	7311285	191	3e-05	23865	1854
RK211_C01	LI	185861	55	0.0003	A/T;51|AC/GT;1|AACAA/TTGTT;1|CA/TG;1|C/G;1	A/T;0.9273|AC/GT;0.0182|AACAA/TTGTT;0.0182|CA/TG;0.0182|C/G;0.0182	5f575442-50d9-44ff-b96f-b27f245a664c/7918b44ab06925779397958dbfc1d0ce.bam	7e325d55-292c-4a90-bcd4-7cbe6ffe26d8/55ddac377438c15e33eb205a44a8baef.bam	7184073	115	2e-05	12659	1309
RK213_C01	LI	171402	12	0.0001	A/T;6|AC/GT;3|CA/TG;2|TA;1	A/T;0.5|AC/GT;0.25|CA/TG;0.1667|TA;0.0833	7e1c4713-c2bf-4f19-8af5-d2c32c029bdb/a233ff2a9e92252c8458853a18c00b9f.bam	2aec4a4c-140b-4c12-bc44-c4e0b36974bd/003db425b6c27cb63c2f24903e8de237.bam	6374239	19	0	15397	2487
RK214_C01	LI	173482	73	0.0004	A/T;64|CA/TG;4|AC/GT;3|TA;2	A/T;0.8767|CA/TG;0.0548|AC/GT;0.0411|TA;0.0274	6b363517-614d-4bfa-afbe-f9e99c742ee4/6b3327cbb0112c0b08023dd7719a2177.bam	82ee6e4d-d796-4093-bc67-4ee808308b14/8505c33e4b44c5ad8d3171f275f24b9b.bam	6746266	151	2e-05	15563	1450
RK215_C01	LI	193843	32	0.0002	A/T;23|CA/TG;5|AT;1|AC/GT;1|TA;1|C/G;1	A/T;0.7188|CA/TG;0.1563|AT;0.0313|AC/GT;0.0313|TA;0.0313|C/G;0.0313	9b0b7b27-6f84-43ac-93f1-8b06cdee34f3/91fd7fc1dda1c7d81ba75a8cdbf81698.bam	39b879d9-37ed-4ff2-bf0c-b7902d7cf00a/829d6e1ddd458a50814f514085ef5304.bam	7338934	57	1e-05	5870	861
RK216_C01	LI	185247	77	0.0004	A/T;69|CA/TG;4|C/G;2|AT;1|TA;1	A/T;0.8961|CA/TG;0.0519|C/G;0.026|AT;0.013|TA;0.013	eba5504e-46d2-4e52-b3a8-02deea4ea4d3/184dc5949a819b3fed7ed18a0379e366.bam	8ff19ad7-fc0a-446e-8632-0f6edeeaf071/b9417e890ae226e91b26effdbc95720a.bam	7058246	131	2e-05	14223	1254
RK217_C01	LI	192191	33	0.0002	A/T;26|CA/TG;4|C/G;2|AAC/GTT;1	A/T;0.7879|CA/TG;0.1212|C/G;0.0606|AAC/GTT;0.0303	a9e723f1-e642-45d9-873b-92b2039b177e/dcfe55785b288fd1ba59669c5455725f.bam	03cab894-c068-4c09-88c1-0843f2271156/3419bfac194cef29e4d22c5d21ff27f3.bam	7345856	93	1e-05	10314	1045
RK219_C01	LI	164245	60	0.0004	A/T;50|CA/TG;4|AC/GT;3|C/G;2|TA;1	A/T;0.8333|CA/TG;0.0667|AC/GT;0.05|C/G;0.0333|TA;0.0167	86c32545-40d8-4165-bd7b-9ae54aaa13ff/555454f06473cec72e8a22ff6d591936.bam	dbb44a22-62ca-4ae8-85fb-cfa4d20a8c20/5ceac1a982999281aa521da71b7d1211.bam	6479662	114	2e-05	15413	1838
RK220_C01	LI	192482	62	0.0003	A/T;50|AC/GT;6|CA/TG;2|GA/TC;2|CATC/GATG;1|C/G;1	A/T;0.8065|AC/GT;0.0968|CA/TG;0.0323|GA/TC;0.0323|CATC/GATG;0.0161|C/G;0.0161	829c9efe-8c7a-403c-9c40-b5dd7621f58a/96146df82cabf1d33c2af506c9a7ca7c.bam	8adeaeab-4277-491c-b21a-7af0987f8512/a0b6801b27c429a096583edf5b4561a2.bam	7403908	102	1e-05	10452	1151
RK221_C01	LI	195477	37	0.0002	A/T;28|AC/GT;4|TA;2|AT;1|AG/CT;1|C/G;1	A/T;0.7568|AC/GT;0.1081|TA;0.0541|AT;0.027|AG/CT;0.027|C/G;0.027	cbd0e524-944b-4e0a-899f-ce4cc8d7f318/99fdfe9d9cd85bce041b745506370d39.bam	e6ff8061-a430-4398-9608-c58d478f01ed/577479bf0c96b6fb0a2aabb0efddc36a.bam	7414261	71	1e-05	16748	1036
RK222_C01	LI	192605	52	0.0003	A/T;39|AC/GT;5|CA/TG;5|AT;1|AG/CT;1|C/G;1	A/T;0.75|AC/GT;0.0962|CA/TG;0.0962|AT;0.0192|AG/CT;0.0192|C/G;0.0192	7aa01df3-d06c-4acc-9dcf-b2ed84661435/f22d607df0f2f70a7b3a2a994dd62059.bam	ea8c233d-3679-4353-936a-b38d11e8cb18/60c1b594f48a5e791f6a8e2d24f02b61.bam	7467450	115	2e-05	10449	1248
RK223_C01	LI	195170	50	0.0003	A/T;41|AC/GT;4|CA/TG;3|C/G;2	A/T;0.82|AC/GT;0.08|CA/TG;0.06|C/G;0.04	6f933269-fa50-44d2-931d-ed7173d5c495/d93c03d9e441c06bba1116808555d48b.bam	d22aa1ac-7dbf-4636-b2c8-7bc454f4f00e/31182e00f43f2e2940f6fd4ce29e73d4.bam	7521688	103	1e-05	17446	1434
RK225_C01	LI	186355	209	0.0011	A/T;189|AG/CT;5|GA/TC;5|CA/TG;4|C/G;2|AC/GT;1|CAA/TTG;1|CAAA/TTTG;1|TCA/TGA;1	A/T;0.9043|AG/CT;0.0239|GA/TC;0.0239|CA/TG;0.0191|C/G;0.0096|AC/GT;0.0048|CAA/TTG;0.0048|CAAA/TTTG;0.0048|TCA/TGA;0.0048	2a7448ae-cb52-4a0e-b9e4-1d3b66e95019/74eb311b043fef2d058681dadfa01f14.bam	a136df66-49c0-4475-9b90-d12e15dfa959/bd968b6797b97f27288f4ae0e21cc496.bam	7170866	902	0.00013	23405	4407
RK227_C01	LI	185796	45	0.0002	A/T;38|C/G;2|AC/GT;1|TA;1|AG/CT;1|CA/TG;1|GA/TC;1	A/T;0.8444|C/G;0.0444|AC/GT;0.0222|TA;0.0222|AG/CT;0.0222|CA/TG;0.0222|GA/TC;0.0222	83d08f48-6a41-41f0-9361-45a8cabbfbad/68ed90e6a720c9eec342c58abe07bb1e.bam	3ec5b551-23d8-469d-9b58-829112fa2a37/2f9700c4ddf26305a9e17af64845931e.bam	7191808	106	1e-05	12239	1268
RK228_C01	LI	188017	89	0.0005	A/T;83|AC/GT;3|AT;1|CA/TG;1|C/G;1	A/T;0.9326|AC/GT;0.0337|AT;0.0112|CA/TG;0.0112|C/G;0.0112	dc665357-9353-4368-8252-de1455481ab8/917bfab08790976b80054a38729906dc.bam	b79fae8c-bb36-4283-b0ad-06b9838e605e/c00fa790888bf9947996dd2d434f4ef4.bam	7249595	158	2e-05	9170	1313
RK229_C01	LI	178714	30	0.0002	A/T;23|CA/TG;3|C/G;2|TA;1|AG/CT;1	A/T;0.7667|CA/TG;0.1|C/G;0.0667|TA;0.0333|AG/CT;0.0333	e811b607-002b-4640-af88-0dff8daf6e93/a8ceb35787789f77e525f0d40441db86.bam	f8270f34-83b4-4617-81e6-358dd6a950a4/813035c27709454d6dffcea4a443da3d.bam	7000234	78	1e-05	11337	1319
RK230_C01	LI	188130	82	0.0004	A/T;73|CA/TG;3|AC/GT;2|C/G;2|AT;1|AG/CT;1	A/T;0.8902|CA/TG;0.0366|AC/GT;0.0244|C/G;0.0244|AT;0.0122|AG/CT;0.0122	8ef16306-45fe-43b9-bdc4-d38cc005dff2/f9efb43e96d9e18baa2c17c779b441c3.bam	fef91ce4-53e9-42f4-87bc-73ac7b613b6e/4716e0df7d4e8128ca2f1f54f5db6a31.bam	7323604	131	2e-05	12618	1433
RK232_C01	LI	191701	59	0.0003	A/T;51|C/G;5|AT;1|CA/TG;1|GA/TC;1	A/T;0.8644|C/G;0.0847|AT;0.0169|CA/TG;0.0169|GA/TC;0.0169	c0b3703c-d171-467d-a33f-4cdcd767c16e/b16e21bff554968b9e9fcbbad349a37a.bam	9d78fc2f-d33d-459d-a12e-3369e7916261/72f6b7109433e5a02c9a9c2113206858.bam	7455831	120	2e-05	9127	1169
RK234_C01	LI	182756	28	0.0002	A/T;19|AT;4|CA/TG;2|AC/GT;1|TA;1|C/G;1	A/T;0.6786|AT;0.1429|CA/TG;0.0714|AC/GT;0.0357|TA;0.0357|C/G;0.0357	2542ae92-f0cb-403d-8233-264b005de5db/c13ae235ddac6767e7af2e19d2092804.bam	728881fc-982b-477c-abf1-055372a38c28/d1ebcf86e0f15e7f04c8a3c287902aac.bam	7267146	55	1e-05	7008	975
RK235_C01	LI	187901	71	0.0004	A/T;61|CA/TG;9|AC/GT;1	A/T;0.8592|CA/TG;0.1268|AC/GT;0.0141	61132e80-cec2-41d5-9049-f61c649d8cc4/481d40808a0ac4c2ac7322e08576f70a.bam	62cb3075-f97f-455a-8715-0055329a5c41/304fd89f2c457256167de88935c196a6.bam	7238142	148	2e-05	19612	1947
RK236_C01	LI	188892	87	0.0005	A/T;79|AC/GT;3|AT;1|TA;1|CA/TG;1|C/G;1|GA/TC;1	A/T;0.908|AC/GT;0.0345|AT;0.0115|TA;0.0115|CA/TG;0.0115|C/G;0.0115|GA/TC;0.0115	fd985006-c162-4210-94ea-9a7a4f5564c3/c0eaba4540539cc01d74a2619d793f6e.bam	bebe4ff3-b887-46a7-aec1-0380bfef3d78/fde0dc373e0ea3fadb755cf5d0c275d9.bam	7371711	157	2e-05	13772	1602
RK237_C01	LI	193015	30	0.0002	A/T;24|AC/GT;3|CA/TG;2|C/G;1	A/T;0.8|AC/GT;0.1|CA/TG;0.0667|C/G;0.0333	cab61434-040d-4877-8fee-5bdea9e104f7/77ef98a76c8f9cf57427195445dc1fef.bam	653c23b5-57b8-4633-909a-1c6e625381c3/f545aa1d53b0f4bb458651dcdcb712a3.bam	7332223	78	1e-05	11688	1115
RK240_C01	LI	187624	15	0.0001	A/T;7|CA/TG;5|AC/GT;1|AT;1|C/G;1	A/T;0.4667|CA/TG;0.3333|AC/GT;0.0667|AT;0.0667|C/G;0.0667	7def4929-d3b5-4fcf-a91c-a0a025881827/e42c41190914a59dbe732a971ea0cac6.bam	48b3987f-acdb-45a1-84f1-bcb44df13b99/89f08566a824bfc832681e212537fbfe.bam	7399554	33	0	14629	1877
RK241_C01	LI	191577	75	0.0004	A/T;67|CA/TG;4|C/G;2|AC/GT;1|AG/CT;1	A/T;0.8933|CA/TG;0.0533|C/G;0.0267|AC/GT;0.0133|AG/CT;0.0133	e5549ba6-2a3b-49e9-a7a8-857aab80b5b5/1f8184bdb88d69c40b7e4ff751e9b44c.bam	9efcd6da-0fc4-4ed7-a3a4-f185afe192c8/66ca43d44c0d21569c6d31eb163f0d0a.bam	7369973	134	2e-05	14235	1457
RK243_C01	LI	187639	38	0.0002	A/T;24|CA/TG;6|AC/GT;4|GA/TC;2|AT;1|TA;1	A/T;0.6316|CA/TG;0.1579|AC/GT;0.1053|GA/TC;0.0526|AT;0.0263|TA;0.0263	f1d684fe-c8af-45b4-a5c3-afa3e58cf35b/0cacb4bfaa63f0c988b9e6e74d137a60.bam	b87412b3-afa4-4e7d-9319-db3d772a5751/6d3909e345e1610c198d877c3a214f29.bam	7161514	65	1e-05	23068	1094
RK244_C01	LI	183948	58	0.0003	A/T;47|AC/GT;5|CA/TG;2|C/G;2|TAA/TTA;1|GA/TC;1	A/T;0.8103|AC/GT;0.0862|CA/TG;0.0345|C/G;0.0345|TAA/TTA;0.0172|GA/TC;0.0172	4796a85e-c26b-4908-ba75-0f040f5f55a9/bb5fe68e342b80f7cd208cd4fa2a40c3.bam	fefe42f5-07f8-49c3-8e59-3f6211f82f46/e3e040980251cd350b4056d6d8234a93.bam	7208096	147	2e-05	25447	1930
RK245_C01	LI	191265	45	0.0002	A/T;43|AT;1|AC/GT;1	A/T;0.9556|AT;0.0222|AC/GT;0.0222	31502b01-8d7b-4832-ad4e-f9ae90e95012/9fb445136812011ae045149ecf7f7c2e.bam	604915a8-70cb-4f8b-8715-6cba7af6ea71/f26562c8deacc964af5565f6ec4549e8.bam	7404626	109	1e-05	19571	1466
RK254_C01	LI	179823	85	0.0005	A/T;77|AC/GT;3|CA/TG;2|TAGA/TCTA;1|C/G;1|GA/TC;1	A/T;0.9059|AC/GT;0.0353|CA/TG;0.0235|TAGA/TCTA;0.0118|C/G;0.0118|GA/TC;0.0118	6c9d3b40-ca25-4792-91e5-e156bfe8f7ac/54d4cde669620c31f9585b5eb0e224eb.bam	98fd26b2-ec34-4018-98d1-901cc7b2dba0/7f520b796426b49512c0a703c722603c.bam	6962395	166	2e-05	17443	1626
RK256_C01	LI	191873	91	0.0005	A/T;80|CA/TG;4|AC/GT;3|C/G;2|AT;1|TA;1	A/T;0.8791|CA/TG;0.044|AC/GT;0.033|C/G;0.022|AT;0.011|TA;0.011	3ff005ab-37f3-46ed-91e1-2553e53fd5fa/8fd3961291c15cf7e6633132ae17d805.bam	712a6b61-0f74-4b80-accb-a189ec1ec498/e27832164b1e2b7a9bb7d287c02f93ae.bam	7463659	169	2e-05	14356	1712
RK257_C01	LI	186692	34	0.0002	A/T;26|AC/GT;2|CA/TG;2|GAA/TTC;1|AG/CT;1|C/G;1|AATGG/CCATT;1	A/T;0.7647|AC/GT;0.0588|CA/TG;0.0588|GAA/TTC;0.0294|AG/CT;0.0294|C/G;0.0294|AATGG/CCATT;0.0294	09c427d2-aa77-426c-9bf0-e003f0798eab/7374469d9e906a5d787ac3a85d35824d.bam	811b79c9-ff4b-489e-a0fa-f00af7ac6e75/184cd60fc339a1f3bce6631ca2c315f5.bam	7220924	72	1e-05	12466	1248
RK258_C01	LI	179064	20	0.0001	A/T;13|AC/GT;5|AT;1|TA;1	A/T;0.65|AC/GT;0.25|AT;0.05|TA;0.05	e49da80f-cbc0-4122-92d5-02d74b740a40/ce01ef892925de38e800ffe501054d8c.bam	8bdb4545-7d1e-426b-9d75-57d56643f473/9e8e7e322b154edbc1ccf49f3f636b5c.bam	7014463	41	1e-05	8745	956
RK260_C01	LI	158108	92	0.0006	A/T;77|AC/GT;6|CA/TG;4|C/G;2|AT;1|TA;1|AG/CT;1	A/T;0.837|AC/GT;0.0652|CA/TG;0.0435|C/G;0.0217|AT;0.0109|TA;0.0109|AG/CT;0.0109	1cd66869-e454-42e4-9794-065e8f7b5b38/51ab960cc08ebc4a3a8ff9bd4fd449bd.bam	32cb0df7-2552-416f-8bc2-14fc40fe752d/8a945a8df7e6a618162fba1c639f0098.bam	6350348	181	3e-05	15264	1966
RK261_C02	LI	193880	96	0.0005	A/T;85|CA/TG;5|C/G;3|AT;1|TA;1|GA/TC;1	A/T;0.8854|CA/TG;0.0521|C/G;0.0313|AT;0.0104|TA;0.0104|GA/TC;0.0104	f2f7fa26-6c43-4c89-9f2f-9806aecbe6ce/70d3c8d48b5e954e982ac6d0fbf3aba5.bam	ec0cb835-756d-4ec3-8158-e8ceb2511e10/a8c700b48a879ffd7cd82beda0ac1f5a.bam	7522207	185	2e-05	17956	1744
RK261_C01	LI	190572	114	0.0006	A/T;105|C/G;4|CA/TG;2|AT;1|AC/GT;1|AACA/TGTT;1	A/T;0.9211|C/G;0.0351|CA/TG;0.0175|AT;0.0088|AC/GT;0.0088|AACA/TGTT;0.0088	f2f7fa26-6c43-4c89-9f2f-9806aecbe6ce/70d3c8d48b5e954e982ac6d0fbf3aba5.bam	6af5a101-e2f1-417a-8098-90f45c67a40f/8e7decc3b0c7649efb154ea345262c54.bam	7403822	225	3e-05	16995	1960
RK262_C01	LI	196164	52	0.0003	A/T;47|CA/TG;4|AG/CT;1	A/T;0.9038|CA/TG;0.0769|AG/CT;0.0192	cdcd16e0-89e1-48d5-8fb3-f727c62f4c1e/e1adafcc2440e2414ca82bc26bdf8347.bam	75eea92c-09a1-47fd-870a-9fd0beaa4133/43f60e3287bf8915ed3881c49229ef01.bam	7574044	106	1e-05	18494	1432
RK263_C01	LI	186319	52	0.0003	A/T;38|CA/TG;6|AC/GT;5|AT;1|CATC/GATG;1|C/G;1	A/T;0.7308|CA/TG;0.1154|AC/GT;0.0962|AT;0.0192|CATC/GATG;0.0192|C/G;0.0192	0b30aada-ddda-4261-8966-affd2ae85331/f14b9e7c73706567a79aa9eae0ad70e4.bam	3282585c-1332-4c05-986a-d2cc4ba24ee3/a887a50bccb0a7f205ee3eaa7ff33155.bam	7359245	116	2e-05	17843	1511
RK264_C01	LI	194588	60	0.0003	A/T;53|AC/GT;3|C/G;2|AG/CT;1|CA/TG;1	A/T;0.8833|AC/GT;0.05|C/G;0.0333|AG/CT;0.0167|CA/TG;0.0167	0af14767-5f45-4b7d-a8ea-01a86d8fe69c/83dd93ad1e729c90da94e9037ee59862.bam	98f16a46-5b87-4d47-9080-4c600ac61f15/b53db4dfebec9b08c60bce745ef77d1a.bam	7508880	114	2e-05	20212	1736
RK265_C01	LI	191109	88	0.0005	A/T;70|C/G;5|AC/GT;4|CA/TG;4|TA;2|ATG/CAT;1|AT;1|AATGG/CCATT;1	A/T;0.7955|C/G;0.0568|AC/GT;0.0455|CA/TG;0.0455|TA;0.0227|ATG/CAT;0.0114|AT;0.0114|AATGG/CCATT;0.0114	fb266ea9-1e55-4bb9-87ec-c416534c24fa/9c70ed3652631ad5754de5f6e779514e.bam	881d084e-95ed-4fa8-a1f0-df2c70d5dc64/235047b7aaa8531d51d3caa50e95ddfc.bam	7400958	170	2e-05	20935	2055
RK266_C01	LI	195068	32	0.0002	A/T;21|CA/TG;4|AC/GT;3|AT;3|GA/TC;1	A/T;0.6563|CA/TG;0.125|AC/GT;0.0938|AT;0.0938|GA/TC;0.0313	05b7d900-8fd8-436c-877b-476e360041f4/6349d1cadea41bbb1713bfca78ba4348.bam	a92ae9f3-30eb-4577-80ee-9df9c17ff069/0bfd773cae9caedbf37ae7a4505f0d34.bam	7460332	49	1e-05	10013	961
RK268_C01	LI	195119	71	0.0004	A/T;63|AT;3|C/G;2|AC/GT;1|TA;1|CA/TG;1	A/T;0.8873|AT;0.0423|C/G;0.0282|AC/GT;0.0141|TA;0.0141|CA/TG;0.0141	0e5150b8-def1-416b-8b99-7450beada6ce/943c812a5caa03d442ff51b60a5fe6d7.bam	8c732cca-df47-4270-9036-0ec081bceb54/e7d0e885f7a064e9d0e4fa5009f19252.bam	7512593	142	2e-05	13548	1411
RK269_C01	LI	188695	996	0.0053	A/T;933|C/G;33|AC/GT;13|CA/TG;9|AG/CT;4|AT;3|TA;1	A/T;0.9367|C/G;0.0331|AC/GT;0.0131|CA/TG;0.009|AG/CT;0.004|AT;0.003|TA;0.001	9018fff8-7df8-4a35-a8b1-e6cd56d5c968/cca9cbd816742762bf78f221dd6457d1.bam	08320882-9bb6-4c33-9657-ca1818113cab/e044e7ce2d1f29bbdaf664c3ae4156c4.bam	7285683	1444	0.0002	12084	4271
RK270_C01	LI	190426	100	0.0005	A/T;89|CA/TG;6|AC/GT;3|C/G;2	A/T;0.89|CA/TG;0.06|AC/GT;0.03|C/G;0.02	089b3265-8213-4cb5-8f19-0c38d80a49ae/3b133d3e5018052411eecda79af27795.bam	fde19dc0-5339-45f6-99f5-b4187b864bf0/e04c5c23920c1aedb60c17524fb2e66a.bam	7449195	192	3e-05	21911	1974
RK272_C01	LI	179032	43	0.0002	A/T;36|CA/TG;3|AC/GT;2|TA;1|C/G;1	A/T;0.8372|CA/TG;0.0698|AC/GT;0.0465|TA;0.0233|C/G;0.0233	ce6cf142-48bf-458a-aef5-a435e90da160/6a2e14909080236225454ef58ca0cb1a.bam	017c5d40-a17e-47f5-aa37-229781a24ce1/27d310a03426b2afd3217fc891e35606.bam	7037948	69	1e-05	4975	907
RK275_C01	LI	160958	64	0.0004	A/T;59|CA/TG;2|AC/GT;1|TA;1|C/G;1	A/T;0.9219|CA/TG;0.0313|AC/GT;0.0156|TA;0.0156|C/G;0.0156	10c23b6c-9a80-4403-82aa-cde4edfe09e5/e5b3ea0bcc27b78b783457040b0df28f.bam	6c2d086c-9b2b-4160-ac6a-8f823e5b2c23/dbceff1bb7fe3091fd117b21b545c3e7.bam	6504539	103	2e-05	8500	1262
RK277_C01	LI	194135	56	0.0003	A/T;48|AC/GT;3|AT;2|CA/TG;2|C/G;1	A/T;0.8571|AC/GT;0.0536|AT;0.0357|CA/TG;0.0357|C/G;0.0179	af57c052-ef6a-4c1c-b0e1-61d880680619/6e14f9a5c86165a3f53266685228fec3.bam	160a6cc7-6784-49fb-a87e-4082368a8c34/45eec16c65b4695d1680a18047f9b1ba.bam	7545429	137	2e-05	12643	1277
RK278_C01	LI	191816	39	0.0002	A/T;31|TA;3|CA/TG;3|AC/GT;1|AT;1	A/T;0.7949|TA;0.0769|CA/TG;0.0769|AC/GT;0.0256|AT;0.0256	2398a1c7-c069-4567-b464-8b930c280d4a/d959453779806dc4311974965c3b6bb0.bam	fde7a87d-520d-4799-9e6a-5a7a2b6693ab/ca7c67691c436029141e2ed6e4f92720.bam	7511712	70	1e-05	7150	1153
RK279_C01	LI	195359	35	0.0002	A/T;27|CA/TG;3|AT;1|AC/GT;1|CATC/GATG;1|C/G;1|GA/TC;1	A/T;0.7714|CA/TG;0.0857|AT;0.0286|AC/GT;0.0286|CATC/GATG;0.0286|C/G;0.0286|GA/TC;0.0286	5a7f06fd-81e8-4a38-8ece-6f5dd5cc6636/774c87d56d1b299fc11420dfa82af30d.bam	4063404b-ad04-4a86-84e1-f0fcead82348/e0c6e2409149501f4b1c03a3e97d8ed2.bam	7562982	63	1e-05	7980	1940
RK280_C01	LI	167177	49	0.0003	A/T;41|AC/GT;4|CA/TG;4	A/T;0.8367|AC/GT;0.0816|CA/TG;0.0816	9d18dd0b-8717-4cda-a740-fae748a1d43f/d89d5e40a1c4d69fba26358baf450d6e.bam	7598deb4-4851-456c-b84a-5436bbc1957a/85f02af2793e68f932bc55896f195eed.bam	6534680	101	2e-05	14389	1701
RK282_C01	LI	188864	137	0.0007	A/T;120|C/G;7|AC/GT;4|TA;2|CA/TG;2|AG/CT;1|AAT/ATT;1	A/T;0.8759|C/G;0.0511|AC/GT;0.0292|TA;0.0146|CA/TG;0.0146|AG/CT;0.0073|AAT/ATT;0.0073	d2ef5796-4fc6-4a36-b60f-c7eadff27c93/b9dc3bc4a0ba47693dbf43b518983144.bam	02c2f3fb-4888-4f57-9962-6401eb0c5231/50e9a6dad94770c415c7eb544c34ad31.bam	7326999	267	4e-05	19055	1920
RK284_C01	LI	189437	37	0.0002	A/T;27|CA/TG;6|AC/GT;2|GA/TC;1|C/G;1	A/T;0.7297|CA/TG;0.1622|AC/GT;0.0541|GA/TC;0.027|C/G;0.027	3e81859f-8bde-400c-835b-5f9cea81fd88/57a36cccbd41f83967abc53ab4969c21.bam	4b9de74b-fd37-41a8-b700-bab7be3bcab0/21b242d2051c3bcb0e189db479b57d96.bam	7365942	61	1e-05	7896	1034
RK285_C01	LI	189125	76	0.0004	A/T;60|CA/TG;7|AC/GT;4|TA;2|C/G;2|GA/TC;1	A/T;0.7895|CA/TG;0.0921|AC/GT;0.0526|TA;0.0263|C/G;0.0263|GA/TC;0.0132	2dbf6974-29a8-409c-aea1-b91e178f05a2/98bc7cbbdc81369f5094a2096ffaaf05.bam	04156768-a664-4b26-ac5d-0503bceaf6a9/7ec36ddeb982bcca20b6168a98a0b3eb.bam	7419736	139	2e-05	8806	1533
RK288_C01	LI	165906	67	0.0004	A/T;60|AC/GT;2|CA/TG;2|GA/TC;2|C/G;1	A/T;0.8955|AC/GT;0.0299|CA/TG;0.0299|GA/TC;0.0299|C/G;0.0149	7b888447-e0b5-46e0-8093-b8ba78f30681/1ffa530d1180d8c43d7ca7eab0f63d08.bam	6f479a4e-6ec1-412b-b3d5-d455300e9e37/aeaf33aa85f04f845000cd7ff85809da.bam	6847268	137	2e-05	18916	1380
RK287_C01	LI	157001	42	0.0003	A/T;36|GA/TC;2|C/G;2|AC/GT;1|TA;1	A/T;0.8571|GA/TC;0.0476|C/G;0.0476|AC/GT;0.0238|TA;0.0238	7b888447-e0b5-46e0-8093-b8ba78f30681/1ffa530d1180d8c43d7ca7eab0f63d08.bam	f275f870-2c68-427c-a0df-bc469fcc32ab/b00f89edf34dd05de31204be4726e0be.bam	6426858	96	1e-05	21621	1699
RK289_C01	LI	192470	204	0.0011	A/T;190|CA/TG;6|C/G;5|AC/GT;2|ACAA/TTGT;1	A/T;0.9314|CA/TG;0.0294|C/G;0.0245|AC/GT;0.0098|ACAA/TTGT;0.0049	c9fd1f8b-6543-4c6d-a457-805d6e16e078/2eeabcd3d0c6c48de3c3fd77e3a43e10.bam	0757374f-d471-4531-942c-8044a27fac0c/82a631fad28430a5ca4b3180fed821f4.bam	7505816	363	5e-05	24727	2720
RK290_C01	LI	193903	14	0.0001	A/T;8|CA/TG;2|AC/GT;1|AT;1|TA;1|C/G;1	A/T;0.5714|CA/TG;0.1429|AC/GT;0.0714|AT;0.0714|TA;0.0714|C/G;0.0714	c9fd1f8b-6543-4c6d-a457-805d6e16e078/2eeabcd3d0c6c48de3c3fd77e3a43e10.bam	6c009021-6d7c-43ef-9b94-1f5cdcb1ec55/5e319c59fb692fc1de9df1128d7da803.bam	7552507	38	1e-05	8914	501
RK297_C01	LI	178909	31	0.0002	A/T;24|AC/GT;3|TA;1|CA/TG;1|GA/TC;1|C/G;1	A/T;0.7742|AC/GT;0.0968|TA;0.0323|CA/TG;0.0323|GA/TC;0.0323|C/G;0.0323	f75284f7-8a99-4878-ae43-9277e78f3662/b2e4209cf90d0d92acf2c65911a652cf.bam	c5a0de42-617f-4b7b-a808-c592118893e8/b76a2522eaf924b30972ccb8087ddf73.bam	6925594	58	1e-05	8365	743
RK298_C01	LI	193190	44	0.0002	A/T;33|AC/GT;4|CA/TG;3|C/G;2|AT;1|TA;1	A/T;0.75|AC/GT;0.0909|CA/TG;0.0682|C/G;0.0455|AT;0.0227|TA;0.0227	127c0341-d193-43f1-b24c-d73c47f6ab6c/bf120509c1780f6fadcc27afcad78c1a.bam	5744dbc4-9f84-4e2f-98b9-15fdadac6864/089c8a8d535ad2d33e8c094b74a18a5a.bam	7520808	80	1e-05	9740	1295
RK303_C01	LI	190634	11	0.0001	AC/GT;5|A/T;3|CA/TG;2|AG/CT;1	AC/GT;0.4545|A/T;0.2727|CA/TG;0.1818|AG/CT;0.0909	753d660d-f1f6-4fca-8710-62bdb368228d/407314055a4b4b1ae231a232d9609075.bam	5495f9d7-1c5e-4095-906a-16d58fa42a63/d6ead30748645077747d1e06f2451224.bam	7414812	12	0	2328	636
RK304_C01	LI	179568	19	0.0001	A/T;13|AC/GT;3|CA/TG;3	A/T;0.6842|AC/GT;0.1579|CA/TG;0.1579	3fe74e5f-bb7f-4c1e-b735-0bde5aa54f7f/6fe2ef7d5ed5cd5331b62dfc805013f3.bam	81e769f7-50f6-4a1a-ae48-46b25e34176e/79656f8415fe11d4ee4df7d5c3261193.bam	7035099	32	0	11107	1010
RK306_C01	LI	168169	69	0.0004	A/T;61|AC/GT;2|CA/TG;2|C/G;2|AT;1|GA/TC;1	A/T;0.8841|AC/GT;0.029|CA/TG;0.029|C/G;0.029|AT;0.0145|GA/TC;0.0145	96c654c5-db73-4b1c-aeb3-249274d6c704/089cb2a201ccd086aeb499ade94caa9e.bam	b847b270-3933-47f8-9ecb-82a7e9a7fd5e/e7960156d3799d1ce046ad3a7fb70df0.bam	6649298	149	2e-05	18892	1954
RK307_C01	LI	190175	84	0.0004	A/T;76|CA/TG;3|AC/GT;2|C/G;2|TA;1	A/T;0.9048|CA/TG;0.0357|AC/GT;0.0238|C/G;0.0238|TA;0.0119	4ab3e9a0-7de4-454b-9c9e-40ee90b72a9f/5d275a6e3fa69baf0f952af04350435d.bam	d5aa4f90-7a53-4665-9d8a-0a052298835a/16b2dbb1d30da5215cf19b4991a510ed.bam	7443713	130	2e-05	5457	960
RK308_C01	LI	181737	51549	0.2836	A/T;49545|C/G;711|AC/GT;384|CA/TG;371|AG/CT;186|GA/TC;167|AT;93|TA;73|ATG/CAT;4|AACA/TGTT;4	A/T;0.9611|C/G;0.0138|AC/GT;0.0074|CA/TG;0.0072|AG/CT;0.0036|GA/TC;0.0032|AT;0.0018|TA;0.0014|ATG/CAT;0.0001|AACA/TGTT;0.0001	72107e5b-e5ca-4f9b-833b-43637f543762/fb87ee796e09e2a4741a05dded7678ed.bam	ac1feab2-661d-48e9-a8b5-a58d3c78524e/0c9f69467874e2dad1435f9b320eb5df.bam	7239058	75164	0.01038	238405	257065
RK309_C01	LI	191004	24	0.0001	A/T;14|CA/TG;6|AC/GT;3|C/G;1	A/T;0.5833|CA/TG;0.25|AC/GT;0.125|C/G;0.0417	9a560a4d-447c-4950-ae52-1913b049f061/b018f6be90cae11938762ec934cb8b95.bam	11370e66-570f-4fef-94fe-9fa5d808ecce/334f452a0fc08046845d9f5e64938c02.bam	7479439	40	1e-05	12998	1401
RK310_C01	LI	184542	54	0.0003	A/T;37|CA/TG;7|C/G;4|AT;2|AC/GT;2|TA;1|GA/TC;1	A/T;0.6852|CA/TG;0.1296|C/G;0.0741|AT;0.037|AC/GT;0.037|TA;0.0185|GA/TC;0.0185	fec2f3b7-d95e-435b-a6e6-2c08f057bf4f/84382874a3698e9964e1e0825380a3d7.bam	585cf036-d778-4c43-862b-edd29602bd56/17b31c224edc1217d8c6dabaebdbc071.bam	7329710	89	1e-05	3845	998
RK316_C01	LI	137021	45	0.0003	A/T;36|CA/TG;4|AC/GT;2|AT;1|CATTC/GAATG;1|C/G;1	A/T;0.8|CA/TG;0.0889|AC/GT;0.0444|AT;0.0222|CATTC/GAATG;0.0222|C/G;0.0222	38601475-51fe-438f-9ee5-9eb18a2b5a36/c8ff382f5fb852da6aa7f51c27c356f5.bam	ea3127aa-c599-4c00-a9be-eb393ae672eb/1e4ee6a031f54daaecbc0822721fe17f.bam	6098250	84	1e-05	5818	1097
RK317_C01	LI	192758	5	0	A/T;2|AC/GT;1|AT;1|CA/TG;1	A/T;0.4|AC/GT;0.2|AT;0.2|CA/TG;0.2	22a85485-0be1-4553-9863-107709eda4a5/6e471cf23f8f6c89545f903cc2c5c539.bam	255f95fe-4f98-4944-bbb6-dad3f1614729/26c9b540ea641a0d7c0bb7204b7f1378.bam	7509047	14	0	6025	723
RK337_C01	LI	190205	55	0.0003	A/T;45|AC/GT;4|AT;3|C/G;2|CA/TG;1	A/T;0.8182|AC/GT;0.0727|AT;0.0545|C/G;0.0364|CA/TG;0.0182	2d45f60c-d70e-4bd4-aec5-216241798df6/0a776f3dd798233cfbc2c72ca19cb867.bam	89c2946a-88ad-4e58-8efc-e23d2fe5d412/083e09867e732022c89efcb3cbffe788.bam	7400842	114	2e-05	13556	1428
RK338_C01	LI	192131	54	0.0003	A/T;45|C/G;4|AC/GT;2|TA;2|CA/TG;1	A/T;0.8333|C/G;0.0741|AC/GT;0.037|TA;0.037|CA/TG;0.0185	92ac24d8-7597-430a-a72d-9545c1f627f4/1f49818e42dda339a93a745584bf1617.bam	876d1f5c-f0a0-42a6-be92-605a84e8d1b5/2e7e17c7b324f339e5293d6728d5dfd7.bam	7408623	115	2e-05	20400	1498
5a7f3c88-ef02-4e97-8009-5622245b6a09	LU	189614	54	0.0003	A/T;34|AC/GT;11|CA/TG;5|AG/CT;2|AT;1|AATGG/CCATT;1	A/T;0.6296|AC/GT;0.2037|CA/TG;0.0926|AG/CT;0.037|AT;0.0185|AATGG/CCATT;0.0185	2816802d-5e8d-4a81-82bf-88f42ff92c38/PCAWG.3fa326fb-473e-49c6-888a-8774c1beed5d.bam	55108813-99d3-4b96-b7d4-8d23554e491c/PCAWG.ab10ec7f-7dca-4615-b5d8-8cc82ae24546.bam	7573620	72	1e-05	2749	936
cd0aeed5-93a1-4287-8a88-fe6b7b5e3983	LU	198380	34	0.0002	A/T;30|AC/GT;3|C/G;1	A/T;0.8824|AC/GT;0.0882|C/G;0.0294	6851f26c-40ea-4087-bdd2-36ae14326355/PCAWG.d412d39f-9208-4414-a4a5-5027a49a80c2.bam	87bdd2cb-4541-4624-8602-271aab9f48d6/PCAWG.d1e29fad-5ab0-4a4a-9535-7f0c42620d3c.bam	7648873	68	1e-05	9467	951
3b20d548-2a7d-4031-85a1-425ca7201d7a	LU	165742	325	0.002	A/T;301|CA/TG;8|C/G;6|AC/GT;4|AG/CT;3|GA/TC;2|CATC/GATG;1	A/T;0.9262|CA/TG;0.0246|C/G;0.0185|AC/GT;0.0123|AG/CT;0.0092|GA/TC;0.0062|CATC/GATG;0.0031	73ee2d9e-03c1-4137-b258-01785d83e8d5/PCAWG.aa8cd9b0-ad0b-4190-8ef0-fe38a3d73ec4.bam	9c6ff2d2-5105-422c-bc55-3458c6b607b8/PCAWG.4939d0e5-81fb-4c65-84f2-e0a1e60705b3.bam	6988521	743	0.00011	178511	8222
49dec0c2-8e75-4f44-a253-82b2ea605890	LU	198401	81	0.0004	A/T;74|CA/TG;2|GA/TC;2|TA;1|AG/CT;1|C/G;1	A/T;0.9136|CA/TG;0.0247|GA/TC;0.0247|TA;0.0123|AG/CT;0.0123|C/G;0.0123	7e297673-f70b-4456-bfbb-405241b52e5f/PCAWG.9631ed6e-47e9-47a6-bcf1-cb7e86c5d907.bam	c14c549a-060f-48c8-92a4-1d7292fc5c3a/PCAWG.9be0695b-3b7f-40f2-805b-84f9a1cf3801.bam	7648928	171	2e-05	53097	1709
15e097e3-e468-466c-8e57-b59fba90bbf2	LU	196364	20	0.0001	A/T;11|AC/GT;2|AT;2|CA/TG;2|C/G;2|GA/TC;1	A/T;0.55|AC/GT;0.1|AT;0.1|CA/TG;0.1|C/G;0.1|GA/TC;0.05	a17e872d-4a71-41cd-b740-b5076f52d2ba/PCAWG.e98c4df4-88af-4752-8e0b-71b802589447.bam	5cb56165-00b7-4aed-b6a7-b2e49769f05e/PCAWG.22de9305-c6a1-457a-9d3c-2703db0df29e.bam	7623774	28	0	23544	1269
f5a97315-1906-4774-980e-0879c6ad368e	LU	190586	39	0.0002	A/T;27|AC/GT;3|AG/CT;3|CA/TG;3|C/G;2|GA/TC;1	A/T;0.6923|AC/GT;0.0769|AG/CT;0.0769|CA/TG;0.0769|C/G;0.0513|GA/TC;0.0256	985545f6-173e-47fd-be47-9e67b1813b60/PCAWG.21037262-db0a-4197-8e5a-b451db18c446.bam	98579430-fcbe-486f-a46e-eebe29cf9a1e/PCAWG.f5dfa3c9-ce13-4db4-91ec-3ac86ba7e579.bam	7506873	87	1e-05	71695	2819
b7f11036-7ac4-41bc-a9a4-64162725fdfc	LU	193482	70	0.0004	A/T;49|CA/TG;5|AG/CT;4|GA/TC;4|AT;3|AC/GT;2|C/G;2|TA;1	A/T;0.7|CA/TG;0.0714|AG/CT;0.0571|GA/TC;0.0571|AT;0.0429|AC/GT;0.0286|C/G;0.0286|TA;0.0143	2075c6a0-bb1b-4e37-9406-48cd774663e2/PCAWG.15292b67-fb52-44e9-bdee-6c4ab861de4b.bam	e308be0d-a60e-43e9-b62f-6a695228e366/PCAWG.2b3d194c-b20a-4cb1-8598-0b07fa7aaa8a.bam	7611667	101	1e-05	36353	1803
bd3e88b3-b37c-4641-85fa-d8125ba324ca	LU	188157	86	0.0005	A/T;70|CA/TG;5|GA/TC;4|C/G;4|AT;2|AC/GT;1	A/T;0.814|CA/TG;0.0581|GA/TC;0.0465|C/G;0.0465|AT;0.0233|AC/GT;0.0116	ddb2aa26-d7af-4fd1-b288-d212177ff49b/PCAWG.31089e68-8da7-4b5e-9098-ba08b1d89020.bam	254e2630-6735-4f4c-9437-07e203531dbe/PCAWG.e37853e0-6fb2-4d2c-9912-8b440e399be9.bam	7490657	346	5e-05	203888	6959
fa2c3620-7e82-4b12-b135-87986f0f2890	LU	167162	64	0.0004	A/T;59|CA/TG;4|AC/GT;1	A/T;0.9219|CA/TG;0.0625|AC/GT;0.0156	d040e058-b8c3-4c8b-a109-0d12686a05b0/PCAWG.419a8c27-3d0c-404a-b1a5-1b0ff17eb674.bam	0f0b82dd-7eb9-462f-8cc7-c3760cd272da/PCAWG.9d0305ff-f5bd-414d-bfe6-f5e66e312dff.bam	7030949	116	2e-05	6723	1122
199bbb0f-996c-40c1-b06d-2066f04be778	LU	173691	72	0.0004	A/T;58|AC/GT;4|C/G;4|CA/TG;2|GA/TC;2|TA;1|AG/CT;1	A/T;0.8056|AC/GT;0.0556|C/G;0.0556|CA/TG;0.0278|GA/TC;0.0278|TA;0.0139|AG/CT;0.0139	38de1790-698c-45ba-b306-a3b1e1662251/PCAWG.669fc2e9-c543-43e4-9862-08667463629f.bam	406a936e-bcf3-47c0-b97b-147b6d1239b9/PCAWG.4d5a508a-2f4f-4ff3-ac98-034622bb3990.bam	7190259	183	3e-05	43740	2399
d5443922-fea5-4ff0-bd6e-8ce04e1951d8	LU	184921	102	0.0006	A/T;80|CA/TG;11|AC/GT;5|C/G;4|AT;1|TA;1	A/T;0.7843|CA/TG;0.1078|AC/GT;0.049|C/G;0.0392|AT;0.0098|TA;0.0098	360598bc-adb8-4cee-94ee-3492eb6a4812/PCAWG.3d95af3d-2577-45f1-b519-b43245d4a9bf.bam	fee29c49-ccd6-460e-af70-c73bd12a1056/PCAWG.3d19fb14-bd8d-4a89-be98-984f69eeedaf.bam	7493225	229	3e-05	74363	3127
bce88385-4a1b-4a8c-920c-060f6a2675d4	LU	169906	127	0.0007	A/T;113|AC/GT;5|C/G;5|CA/TG;2|TA;1|GA/TC;1	A/T;0.8898|AC/GT;0.0394|C/G;0.0394|CA/TG;0.0157|TA;0.0079|GA/TC;0.0079	e0c4cc3e-eed4-43a6-aa51-786a138d6d2c/PCAWG.b9774cc1-74c1-47a5-a60a-0703e2c2ab05.bam	4c604b7f-2599-4b2b-bcd1-c279e62baab6/PCAWG.cb694f72-81b9-4ca7-8dc1-73f0dd77a03b.bam	7128118	265	4e-05	48604	2586
9c7b3ac8-1352-49cd-8a8c-df6b19f6fd64	LU	193888	45	0.0002	A/T;34|CA/TG;5|AC/GT;4|AT;1|AG/CT;1	A/T;0.7556|CA/TG;0.1111|AC/GT;0.0889|AT;0.0222|AG/CT;0.0222	6352b63c-3fcb-476a-ba81-12895690bef9/PCAWG.cd70c727-f427-4522-80aa-7341d6c3db47.bam	f3dc02b1-8175-493a-8bd0-b6ab3aae2a2a/PCAWG.a77bb578-a75d-44c9-bf02-4164c2980621.bam	7589428	54	1e-05	1071	571
[truncated: 1,449 more rows]

## Sheet: Table S3
Table S3; Correlation between the total number of SNVs/indels and the number of SNVs/indels in 1Mbp bins
	SNV		Indel
Bin start	r	p-value	r	p-value
Chr1:0	0.744418	0	0.948275	0
Chr1:1000000	0.9671	0	0.873191	0
Chr1:10000000	0.978526	0	0.949034	0
Chr1:100000000	0.981821	0	0.970577	0
Chr1:101000000	0.977901	0	0.988887	0
[truncated: 2,910 more rows]

## Sheet: Table S4
Table S4; Summary of regression on proportion of mutated samples in each microsatellite
[truncated: 148 more rows]

[truncated: 11 more sheets: Table S5, Table S6, Table S7, Table S8, Table S9, Table S10, Table S11, Table S12, Table S13, Table S14, Table S15]
